# Supplementary material
Source: publisher figshare collection journal article supplement (https://acs.figshare.com/ndownloader/files/4823542)
Supplement: Supplementary file 1 [file 4823542]

 
data_1
 
_audit_creation_method            SHELXL-2014/6
_chemical_name_systematic         ?
_chemical_name_common             ?
_chemical_melting_point           ?
_chemical_formula_moiety          ?
_chemical_formula_sum
 'H160 K10 La4 Mn9 O216 Si4 W36' 
_chemical_formula_weight          11788.77

loop_
 _atom_type_symbol
 _atom_type_description
 _atom_type_scat_dispersion_real
 _atom_type_scat_dispersion_imag
 _atom_type_scat_source
 'K'  'K'   0.2009   0.2494
 'International Tables Vol C Tables 4.2.6.8 and 6.1.1.4'
 'La'  'La'  -0.2871   2.4523
 'International Tables Vol C Tables 4.2.6.8 and 6.1.1.4'
 'Mn'  'Mn'   0.3368   0.7283
 'International Tables Vol C Tables 4.2.6.8 and 6.1.1.4'
 'O'  'O'   0.0106   0.0060
 'International Tables Vol C Tables 4.2.6.8 and 6.1.1.4'
 'Si'  'Si'   0.0817   0.0704
 'International Tables Vol C Tables 4.2.6.8 and 6.1.1.4'
 'W'  'W'  -0.8490   6.8722
 'International Tables Vol C Tables 4.2.6.8 and 6.1.1.4'
 
_space_group_crystal_system       monoclinic
_space_group_IT_number            15
_space_group_name_H-M_alt         'C 2/c'
_space_group_name_Hall            '-C 2yc'
 
_shelx_space_group_comment
;
The symmetry employed for this shelxl refinement is uniquely defined
by the following loop, which should always be used as a source of
symmetry information in preference to the above space-group names.
They are only intended as comments.
;
 
loop_
 _space_group_symop_operation_xyz
 'x, y, z'
 '-x, y, -z+1/2'
 'x+1/2, y+1/2, z'
 '-x+1/2, y+1/2, -z+1/2'
 '-x, -y, -z'
 'x, -y, z-1/2'
 '-x+1/2, -y+1/2, -z'
 'x+1/2, -y+1/2, z-1/2'
 
_cell_length_a                    33.090(2)
_cell_length_b                    12.8044(10)
_cell_length_c                    22.8273(17)
_cell_angle_alpha                 90
_cell_angle_beta                  91.3460(10)
_cell_angle_gamma                 90
_cell_volume                      9669.2(12)
_cell_formula_units_Z             2
_cell_measurement_temperature     296(2)
_cell_measurement_reflns_used     6887
_cell_measurement_theta_min       2.44
_cell_measurement_theta_max       28.27
 
_exptl_crystal_description        BLOCK
_exptl_crystal_colour             YELLOW
_exptl_crystal_density_meas       ?
_exptl_crystal_density_method     ?
_exptl_crystal_density_diffrn     4.049          
_exptl_crystal_F_000              9866
_exptl_transmission_factor_min    ?
_exptl_transmission_factor_max    ?
_exptl_crystal_size_max           0.240
_exptl_crystal_size_mid           0.210
_exptl_crystal_size_min           0.150
_exptl_absorpt_coefficient_mu     23.014
_shelx_estimated_absorpt_T_min    0.072
_shelx_estimated_absorpt_T_max    0.130
_exptl_absorpt_correction_type    MULTI-SCAN
_exptl_absorpt_correction_T_min   0.006
_exptl_absorpt_correction_T_max   0.032
_exptl_absorpt_process_details    ?
_exptl_absorpt_special_details    ?
_diffrn_ambient_temperature       296(2)
_diffrn_radiation_wavelength      0.71073
_diffrn_radiation_type            MoK\a
_diffrn_source                    ?
_diffrn_measurement_device_type   'CCD area detector'
_diffrn_measurement_method        'phi and omega scans'
_diffrn_detector_area_resol_mean  ?
_diffrn_reflns_number             28957
_diffrn_reflns_av_unetI/netI      0.1626
_diffrn_reflns_av_R_equivalents   0.2204
_diffrn_reflns_limit_h_min        -43
_diffrn_reflns_limit_h_max        42
_diffrn_reflns_limit_k_min        -12
_diffrn_reflns_limit_k_max        17
_diffrn_reflns_limit_l_min        -30
_diffrn_reflns_limit_l_max        21
_diffrn_reflns_theta_min          1.705
_diffrn_reflns_theta_max          28.404
_diffrn_reflns_theta_full         25.242
_diffrn_measured_fraction_theta_max   0.944
_diffrn_measured_fraction_theta_full  0.995
_diffrn_reflns_Laue_measured_fraction_max    0.944
_diffrn_reflns_Laue_measured_fraction_full   0.995
_diffrn_reflns_point_group_measured_fraction_max   0.944
_diffrn_reflns_point_group_measured_fraction_full  0.995
_reflns_number_total              11449
_reflns_number_gt                 7702
_reflns_threshold_expression      'I > 2\s(I)'
_reflns_Friedel_coverage          0.000
_reflns_Friedel_fraction_max      .
_reflns_Friedel_fraction_full     .
 
_reflns_special_details
;
 Reflections were merged by SHELXL according to the crystal
 class for the calculation of statistics and refinement.
 
 _reflns_Friedel_fraction is defined as the number of unique
 Friedel pairs measured divided by the number that would be
 possible theoretically, ignoring centric projections and
 systematic absences.
;
 
_computing_data_collection        ?
_computing_cell_refinement        ?
_computing_data_reduction         ?
_computing_structure_solution     ?
_computing_structure_refinement 'SHELXL-2014/6 (Sheldrick, 2014)'
_computing_molecular_graphics     ?
_computing_publication_material   ?
_refine_special_details           ?
_refine_ls_structure_factor_coef  Fsqd
_refine_ls_matrix_type            full
_refine_ls_weighting_scheme       calc
_refine_ls_weighting_details
'w=1/[\s^2^(Fo^2^)+(0.1297P)^2^] where P=(Fo^2^+2Fc^2^)/3'
_atom_sites_solution_primary      ?
_atom_sites_solution_secondary    ?
_atom_sites_solution_hydrogens    .
_refine_ls_hydrogen_treatment     undef
_refine_ls_extinction_method      none
_refine_ls_extinction_coef        .
_refine_ls_number_reflns          11449
_refine_ls_number_parameters      603
_refine_ls_number_restraints      1338
_refine_ls_R_factor_all           0.1099
_refine_ls_R_factor_gt            0.0793
_refine_ls_wR_factor_ref          0.2267
_refine_ls_wR_factor_gt           0.2034
_refine_ls_goodness_of_fit_ref    0.985
_refine_ls_restrained_S_all       0.941
_refine_ls_shift/su_max           0.000
_refine_ls_shift/su_mean          0.000
 
loop_
 _atom_site_label
 _atom_site_type_symbol
 _atom_site_fract_x
 _atom_site_fract_y
 _atom_site_fract_z
 _atom_site_U_iso_or_equiv
 _atom_site_adp_type
 _atom_site_occupancy
 _atom_site_site_symmetry_order  
 _atom_site_calc_flag
 _atom_site_refinement_flags_posn
 _atom_site_refinement_flags_adp
 _atom_site_refinement_flags_occupancy
 _atom_site_disorder_assembly
 _atom_site_disorder_group
K1 K 0.0773(2) 0.4864(5) 0.3967(3) 0.0413(15) Uani 1 1 d . . . . .
K2 K 0.0403(4) 0.0350(10) 0.5339(6) 0.038(3) Uani 0.5 1 d . . P . .
La1 La 0.16463(4) 0.22730(9) 0.37713(5) 0.0115(2) Uani 1 1 d . . . . .
Mn1 Mn 0.24553(10) 0.1176(2) 0.09634(13) 0.0120(4) Uani 1 1 d . U . . .
Mn2 Mn 0.26112(9) 0.3453(2) 0.04386(13) 0.0120(4) Uani 1 1 d . U . . .
Mn3 Mn 0.0233(5) 0.9363(10) 0.2818(6) 0.023(2) Uani 0.25 1 d . U P . .
O1 O 0.2127(4) 0.2286(11) 0.0373(6) 0.0135(9) Uani 1 1 d . U . . .
O2 O 0.0172(4) 0.2524(11) -0.0563(6) 0.013(2) Uani 1 1 d . U . . .
O3 O 0.1288(5) 0.5154(12) 0.1246(7) 0.0185(11) Uani 1 1 d . U . . .
O4 O 0.1208(5) 0.5441(11) 0.0080(6) 0.0160(11) Uani 1 1 d . U . . .
O5 O 0.0800(4) 0.1070(11) -0.0568(6) 0.0138(11) Uani 1 1 d . U . . .
O6 O 0.0634(4) 0.1926(11) 0.0457(6) 0.0149(10) Uani 1 1 d . U . . .
O7 O 0.0927(4) 0.2971(11) -0.1026(6) 0.0146(11) Uani 1 1 d . U . . .
O8 O 0.2261(4) 0.4437(11) -0.0179(6) 0.0141(10) Uani 1 1 d . U . . .
O9 O 0.2058(4) 0.2707(11) -0.0972(6) 0.0135(10) Uani 1 1 d . U . . .
O10 O 0.1518(5) 0.3315(12) -0.1833(6) 0.017(2) Uani 1 1 d . U . . .
O11 O 0.1255(4) 0.0162(11) 0.0248(6) 0.0145(10) Uani 1 1 d . U . . .
O12 O 0.0877(4) 0.0599(12) 0.1240(7) 0.0163(12) Uani 1 1 d . U . . .
O13 O 0.1400(4) 0.2212(11) -0.0175(6) 0.0144(9) Uani 1 1 d . U . . .
O14 O 0.0821(4) 0.3496(11) 0.1153(6) 0.0162(10) Uani 1 1 d . U . . .
O15 O 0.2190(4) 0.1958(11) 0.1677(6) 0.0152(9) Uani 1 1 d . U . . .
O16 O 0.0769(4) 0.3828(11) -0.0028(6) 0.0155(10) Uani 1 1 d . U . . .
O17 O 0.1895(4) 0.0476(11) -0.0410(6) 0.0136(10) Uani 1 1 d . U . . .
O18 O 0.2341(4) 0.4122(11) 0.1184(6) 0.0159(10) Uani 1 1 d . U . . .
O19 O 0.1978(4) 0.0128(11) 0.0881(6) 0.0141(10) Uani 1 1 d . U . . .
O20 O 0.2759(5) 0.0107(11) 0.1588(7) 0.017(2) Uani 1 1 d . U . . .
O21 O 0.1463(4) 0.1943(11) 0.0977(6) 0.0147(9) Uani 1 1 d . U . . .
O22 O 0.1595(4) 0.3813(11) 0.0514(6) 0.0146(9) Uani 1 1 d . U . . .
O23 O 0.1672(4) 0.3538(11) 0.1753(7) 0.0170(9) Uani 1 1 d . U . . .
O24 O 0.0263(4) 0.2009(11) 0.1567(6) 0.016(2) Uani 1 1 d . U . . .
O25 O 0.1753(5) 0.2161(12) 0.2689(7) 0.0177(13) Uani 1 1 d . U . . .
O26 O 0.1917(4) 0.5613(11) 0.0634(6) 0.0154(10) Uani 1 1 d . U . . .
O27 O 0.1850(4) 0.6208(11) -0.0545(6) 0.0156(14) Uani 1 1 d . U . . .
O28 O 0.1267(4) -0.0659(11) -0.0888(6) 0.0147(14) Uani 1 1 d . U . . .
O29 O 0.1367(5) -0.1224(12) 0.1227(7) 0.018(2) Uani 1 1 d . U . . .
O30 O 0.1991(5) 0.5620(12) 0.1871(7) 0.0197(19) Uani 1 1 d . U . . .
O31 O 0.1077(5) 0.2221(11) 0.1957(7) 0.0168(10) Uani 1 1 d . U . . .
O32 O 0.1569(5) 0.0602(11) 0.1841(6) 0.0160(10) Uani 1 1 d . U . . .
O33 O 0.0520(5) 0.5423(11) 0.0749(7) 0.019(2) Uani 1 1 d . U . . .
O34 O 0.1533(4) 0.4228(11) -0.0718(6) 0.0149(10) Uani 1 1 d . U . . .
O35 O 0.1429(4) 0.1411(11) -0.1219(6) 0.0143(12) Uani 1 1 d . U . . .
O1W O 0.2045(5) 0.0705(12) 0.3488(7) 0.022(3) Uani 1 1 d . U . . .
O2W O 0.2348(5) 0.3002(12) 0.3524(7) 0.020(2) Uani 1 1 d . U . . .
O3W O 0.2070(5) 0.1604(12) 0.4629(7) 0.022(3) Uani 1 1 d . U . . .
O4W O 0.1095(5) 0.2761(13) 0.4452(8) 0.027(2) Uani 1 1 d . U . . .
O5W O 0.1432(5) 0.4082(13) 0.3305(7) 0.023(2) Uani 1 1 d . U . . .
O6W O 0.0981(5) 0.1977(14) 0.3171(8) 0.027(2) Uani 1 1 d . U . . .
O7W O 0.0453(7) 0.7773(17) 0.3047(10) 0.045(3) Uani 1 1 d . U . . .
O8W O 0.0000 1.092(2) 0.2500 0.032(3) Uani 1 2 d S TU P . .
O9W O 0.0417(7) 1.0233(16) 0.3602(9) 0.044(3) Uani 1 1 d . U . . .
O10W O 0.2015(5) 0.7676(11) 0.0749(7) 0.0171(18) Uani 1 1 d . U . . .
O11W O 0.0175(6) 0.3957(15) 0.4582(8) 0.034(2) Uani 1 1 d . U . . .
O12W O 0.0375(6) 0.1755(15) 0.4446(8) 0.034(2) Uani 1 1 d . U . . .
O13W O 0.0315(6) 0.3436(15) 0.3239(8) 0.0346(19) Uani 1 1 d . U . . .
O14W O 0.0920(5) 0.4389(13) 0.2409(7) 0.0240(13) Uani 1 1 d . U . . .
O15W O 0.1129(6) 0.6658(14) 0.2123(7) 0.0306(18) Uani 1 1 d . U . . .
O16W O 0.2804(5) 0.4758(13) 0.2554(7) 0.0227(18) Uani 1 1 d . U . . .
O17W O 0.2747(5) 0.2522(12) 0.2535(7) 0.0210(16) Uani 1 1 d . U . . .
Si1 Si 0.16539(18) 0.2559(4) 0.0418(2) 0.0125(7) Uani 1 1 d . U . . .
W1 W 0.15249(3) 0.28816(6) -0.11171(4) 0.01155(19) Uani 1 1 d . . . . .
W2 W 0.18741(3) 0.47336(6) 0.13283(4) 0.01243(19) Uani 1 1 d . . . . .
W3 W 0.09391(3) 0.46788(6) 0.06537(4) 0.0135(2) Uani 1 1 d . . . . .
W4 W 0.16854(3) 0.21285(6) 0.19304(4) 0.0128(2) Uani 1 1 d . . . . .
W5 W 0.13676(3) 0.05231(6) -0.05254(4) 0.0127(2) Uani 1 1 d . . . . .
W6 W 0.07536(3) 0.20254(6) 0.12751(4) 0.0143(2) Uani 1 1 d . . . . .
W7 W 0.17834(2) 0.50850(6) -0.01364(4) 0.01105(19) Uani 1 1 d . . . . .
W8 W 0.06692(3) 0.24492(7) -0.03352(4) 0.0139(2) Uani 1 1 d . . . . .
W9 W 0.14511(3) 0.00933(6) 0.10578(4) 0.0158(2) Uani 1 1 d . . . . .
 
loop_
 _atom_site_aniso_label
 _atom_site_aniso_U_11
 _atom_site_aniso_U_22
 _atom_site_aniso_U_33
 _atom_site_aniso_U_23
 _atom_site_aniso_U_13
 _atom_site_aniso_U_12
K1 0.045(4) 0.028(3) 0.051(4) -0.001(3) 0.006(3) 0.000(3)
K2 0.050(8) 0.022(6) 0.043(7) 0.002(5) -0.007(6) 0.000(5)
La1 0.0192(6) 0.0025(5) 0.0127(5) 0.0003(4) -0.0037(4) -0.0005(4)
Mn1 0.0201(9) 0.0021(8) 0.0137(9) 0.0000(7) -0.0033(7) 0.0014(7)
Mn2 0.0201(9) 0.0021(8) 0.0137(9) 0.0000(7) -0.0033(7) 0.0014(7)
Mn3 0.047(5) 0.007(4) 0.013(4) 0.002(3) -0.013(4) 0.004(3)
O1 0.0205(17) 0.0044(17) 0.0153(17) -0.0001(16) -0.0036(16) 0.0014(16)
O2 0.014(4) 0.009(4) 0.016(4) 0.002(4) -0.009(4) 0.003(4)
O3 0.026(2) 0.0098(19) 0.019(2) -0.0022(19) -0.0043(19) 0.0025(19)
O4 0.023(2) 0.007(2) 0.017(2) -0.0002(19) -0.004(2) 0.002(2)
O5 0.019(2) 0.006(2) 0.016(2) -0.001(2) -0.004(2) 0.001(2)
O6 0.0207(19) 0.0076(18) 0.0162(18) -0.0006(17) -0.0040(18) 0.0016(18)
O7 0.020(2) 0.007(2) 0.017(2) 0.000(2) -0.005(2) 0.001(2)
O8 0.0213(19) 0.0050(18) 0.0157(18) -0.0009(18) -0.0042(18) 0.0019(18)
O9 0.0194(19) 0.0052(19) 0.0155(19) -0.0006(18) -0.0048(18) 0.0014(18)
O10 0.025(4) 0.010(4) 0.016(4) 0.003(4) -0.006(4) 0.004(4)
O11 0.0207(18) 0.0062(18) 0.0165(18) -0.0007(17) -0.0032(17) 0.0008(17)
O12 0.023(2) 0.008(2) 0.018(2) -0.001(2) -0.004(2) 0.002(2)
O13 0.0208(17) 0.0058(17) 0.0165(17) -0.0008(16) -0.0040(16) 0.0014(16)
O14 0.0228(18) 0.0083(18) 0.0174(18) 0.0003(17) -0.0037(17) 0.0032(17)
O15 0.0229(17) 0.0061(17) 0.0165(17) -0.0009(16) -0.0028(16) 0.0019(16)
O16 0.0212(19) 0.0074(18) 0.0175(18) -0.0014(17) -0.0053(18) 0.0024(18)
O17 0.0193(19) 0.0055(18) 0.0159(19) -0.0005(18) -0.0047(18) 0.0014(18)
O18 0.0237(19) 0.0066(18) 0.0172(18) -0.0013(17) -0.0040(17) 0.0018(17)
O19 0.021(2) 0.0052(19) 0.0161(19) -0.0005(18) -0.0024(19) 0.0016(18)
O20 0.028(4) 0.006(4) 0.017(4) 0.000(4) -0.003(4) 0.004(4)
O21 0.0216(17) 0.0060(16) 0.0161(16) -0.0010(15) -0.0040(15) 0.0017(15)
O22 0.0216(17) 0.0057(16) 0.0164(16) -0.0009(15) -0.0038(15) 0.0019(15)
O23 0.0243(18) 0.0085(17) 0.0179(17) -0.0014(16) -0.0037(16) 0.0021(16)
O24 0.023(4) 0.006(4) 0.019(4) 0.001(4) 0.004(4) 0.002(4)
O25 0.025(2) 0.010(2) 0.018(2) -0.001(2) -0.004(2) 0.001(2)
O26 0.0231(19) 0.0066(18) 0.0164(19) -0.0023(18) -0.0038(18) 0.0022(18)
O27 0.023(3) 0.006(2) 0.016(3) -0.001(2) -0.005(2) 0.003(2)
O28 0.019(3) 0.007(3) 0.018(3) 0.000(3) -0.003(3) 0.001(3)
O29 0.025(4) 0.010(4) 0.018(4) -0.002(4) -0.003(4) 0.003(4)
O30 0.029(4) 0.010(4) 0.020(4) -0.004(3) -0.003(3) 0.002(3)
O31 0.023(2) 0.0088(19) 0.0180(19) -0.0012(18) -0.0038(18) 0.0021(18)
O32 0.0231(19) 0.0077(19) 0.0169(19) -0.0018(18) -0.0043(18) 0.0011(18)
O33 0.029(4) 0.006(4) 0.020(4) 0.001(4) -0.005(4) 0.002(4)
O34 0.0214(19) 0.0065(18) 0.0167(19) -0.0003(18) -0.0044(18) 0.0026(18)
O35 0.019(2) 0.006(2) 0.017(2) -0.001(2) -0.004(2) 0.001(2)
O1W 0.031(5) 0.012(5) 0.021(5) 0.003(5) -0.007(5) 0.000(5)
O2W 0.029(4) 0.009(4) 0.021(4) -0.004(4) -0.006(4) -0.002(4)
O3W 0.034(5) 0.009(5) 0.023(5) 0.000(5) -0.003(5) -0.003(5)
O4W 0.034(5) 0.017(4) 0.030(5) -0.003(4) 0.004(4) -0.003(4)
O5W 0.032(4) 0.014(4) 0.024(4) -0.001(4) -0.002(4) 0.000(4)
O6W 0.032(4) 0.022(4) 0.028(4) 0.002(4) -0.002(4) 0.001(4)
O7W 0.064(6) 0.035(6) 0.037(6) 0.002(5) -0.007(6) 0.001(6)
O8W 0.057(7) 0.017(6) 0.022(6) 0.000 -0.011(5) 0.000
O9W 0.068(7) 0.030(6) 0.033(6) -0.002(5) -0.020(6) 0.007(5)
O10W 0.025(3) 0.009(3) 0.018(3) -0.002(3) -0.004(3) 0.004(3)
O11W 0.041(4) 0.024(4) 0.037(4) -0.001(4) 0.001(4) 0.000(4)
O12W 0.041(4) 0.025(4) 0.037(4) 0.000(4) -0.001(4) -0.001(4)
O13W 0.042(4) 0.026(4) 0.037(4) -0.001(3) -0.002(3) 0.000(3)
O14W 0.031(2) 0.016(2) 0.024(2) -0.002(2) -0.004(2) 0.004(2)
O15W 0.040(3) 0.024(3) 0.027(3) -0.005(3) -0.008(3) 0.009(3)
O16W 0.031(3) 0.015(3) 0.023(3) -0.003(3) -0.004(3) -0.002(3)
O17W 0.029(3) 0.014(3) 0.020(3) -0.002(3) -0.005(3) 0.000(3)
Si1 0.0189(14) 0.0039(13) 0.0144(13) -0.0003(12) -0.0032(12) 0.0019(12)
W1 0.0174(4) 0.0047(4) 0.0124(4) -0.0005(3) -0.0041(3) 0.0015(3)
W2 0.0209(4) 0.0032(4) 0.0129(4) -0.0021(3) -0.0034(3) -0.0005(3)
W3 0.0194(4) 0.0051(4) 0.0158(4) -0.0006(3) -0.0015(3) 0.0016(3)
W4 0.0208(4) 0.0064(4) 0.0110(4) 0.0001(3) -0.0025(3) 0.0013(3)
W5 0.0181(4) 0.0036(4) 0.0164(4) -0.0036(3) -0.0023(3) -0.0008(3)
W6 0.0197(4) 0.0073(4) 0.0157(4) -0.0001(3) -0.0016(3) -0.0004(3)
W7 0.0180(4) 0.0010(3) 0.0141(4) 0.0009(3) -0.0023(3) 0.0010(3)
W8 0.0183(4) 0.0082(4) 0.0151(4) -0.0020(3) -0.0039(3) 0.0012(3)
W9 0.0235(5) 0.0049(4) 0.0188(4) 0.0002(3) -0.0003(3) -0.0006(3)
 
_geom_special_details
;
 All esds (except the esd in the dihedral angle between two l.s. planes)
 are estimated using the full covariance matrix.  The cell esds are taken
 into account individually in the estimation of esds in distances, angles
 and torsion angles; correlations between esds in cell parameters are only
 used when they are defined by crystal symmetry.  An approximate (isotropic)
 treatment of cell esds is used for estimating esds involving l.s. planes.
;
 
loop_
 _geom_bond_atom_site_label_1
 _geom_bond_atom_site_label_2
 _geom_bond_distance
 _geom_bond_site_symmetry_2
 _geom_bond_publ_flag
La1 O1W 2.496(16) . ?
La1 O4W 2.503(17) . ?
La1 O25 2.509(16) . ?
La1 O3W 2.531(16) . ?
La1 O28 2.548(14) 6_556 ?
La1 O27 2.574(14) 6_566 ?
La1 O2W 2.576(16) . ?
La1 O6W 2.593(17) . ?
La1 O5W 2.640(16) . ?
Mn1 O19 2.079(15) . ?
Mn1 O15 2.119(15) . ?
Mn1 O9 2.153(15) 7 ?
Mn1 O8 2.187(15) 7 ?
Mn1 O20 2.203(15) . ?
Mn1 O1 2.223(14) . ?
Mn1 Mn2 3.198(4) . ?
Mn1 Mn2 3.238(4) 7 ?
Mn2 O18 2.121(15) . ?
Mn2 O17 2.137(15) 7 ?
Mn2 O1 2.192(15) . ?
Mn2 O9 2.196(14) 7 ?
Mn2 O8 2.200(14) . ?
Mn2 O1 2.270(15) 7 ?
Mn2 Mn2 3.230(6) 7 ?
Mn2 Mn1 3.238(4) 7 ?
Mn3 Mn3 2.09(3) 2 ?
Mn3 O9W 2.18(2) . ?
Mn3 O7W 2.22(3) . ?
Mn3 O8W 2.25(3) . ?
O1 Si1 1.611(16) . ?
O1 Mn2 2.270(15) 7 ?
O2 W8 1.717(14) . ?
O3 W3 1.859(15) . ?
O3 W2 2.018(15) . ?
O4 W3 1.875(15) . ?
O4 W7 2.031(15) . ?
O5 W8 1.897(14) . ?
O5 W5 2.004(14) . ?
O6 W6 1.904(14) . ?
O6 W8 1.935(15) . ?
O7 W8 1.929(15) . ?
O7 W1 1.997(15) . ?
O8 W7 1.791(14) . ?
O8 Mn1 2.187(15) 7 ?
O9 W1 1.802(14) . ?
O9 Mn1 2.153(15) 7 ?
O9 Mn2 2.196(14) 7 ?
O10 W1 1.726(15) . ?
O11 W5 1.870(15) . ?
O11 W9 1.947(15) . ?
O12 W6 1.874(15) . ?
O12 W9 2.059(15) . ?
O13 Si1 1.637(15) . ?
O13 W5 2.307(14) . ?
O13 W1 2.362(15) . ?
O13 W8 2.457(15) . ?
O14 W6 1.917(15) . ?
O14 W3 1.940(15) . ?
O15 W4 1.794(15) . ?
O16 W8 1.925(14) . ?
O16 W3 1.970(14) . ?
O17 W5 1.758(14) . ?
O17 Mn2 2.137(15) 7 ?
O18 W2 1.770(15) . ?
O19 W9 1.798(15) . ?
O21 Si1 1.637(16) . ?
O21 W4 2.294(14) . ?
O21 W9 2.377(14) . ?
O21 W6 2.464(15) . ?
O22 Si1 1.633(15) . ?
O22 W7 2.299(15) . ?
O22 W2 2.370(14) . ?
O22 W3 2.465(14) . ?
O23 W4 1.850(15) . ?
O23 W2 1.940(15) . ?
O24 W6 1.769(15) . ?
O25 W4 1.740(15) . ?
O26 W7 1.926(14) . ?
O26 W2 1.952(15) . ?
O27 W7 1.730(15) . ?
O27 La1 2.574(14) 6_565 ?
O28 W5 1.753(14) . ?
O28 La1 2.548(14) 6 ?
O29 W9 1.754(15) . ?
O30 W2 1.717(15) . ?
O31 W6 1.886(15) . ?
O31 W4 2.018(15) . ?
O32 W9 1.934(15) . ?
O32 W4 2.002(15) . ?
O33 W3 1.702(15) . ?
O34 W7 1.897(14) . ?
O34 W1 1.950(14) . ?
O35 W1 1.923(14) . ?
O35 W5 1.963(14) . ?
O8W Mn3 2.25(3) 2 ?
 
loop_
 _geom_angle_atom_site_label_1
 _geom_angle_atom_site_label_2
 _geom_angle_atom_site_label_3
 _geom_angle
 _geom_angle_site_symmetry_1
 _geom_angle_site_symmetry_3
 _geom_angle_publ_flag
O1W La1 O4W 139.4(5) . . ?
O1W La1 O25 67.1(5) . . ?
O4W La1 O25 138.4(6) . . ?
O1W La1 O3W 69.0(5) . . ?
O4W La1 O3W 90.2(6) . . ?
O25 La1 O3W 130.9(5) . . ?
O1W La1 O28 72.2(5) . 6_556 ?
O4W La1 O28 69.0(5) . 6_556 ?
O25 La1 O28 109.6(5) . 6_556 ?
O3W La1 O28 75.9(5) . 6_556 ?
O1W La1 O27 129.2(5) . 6_566 ?
O4W La1 O27 67.6(5) . 6_566 ?
O25 La1 O27 126.9(5) . 6_566 ?
O3W La1 O27 69.8(5) . 6_566 ?
O28 La1 O27 123.5(5) 6_556 6_566 ?
O1W La1 O2W 75.5(5) . . ?
O4W La1 O2W 136.0(5) . . ?
O25 La1 O2W 69.9(5) . . ?
O3W La1 O2W 78.9(5) . . ?
O28 La1 O2W 144.4(5) 6_556 . ?
O27 La1 O2W 68.6(5) 6_566 . ?
O1W La1 O6W 101.1(5) . . ?
O4W La1 O6W 75.1(6) . . ?
O25 La1 O6W 66.9(5) . . ?
O3W La1 O6W 143.8(5) . . ?
O28 La1 O6W 68.0(5) 6_556 . ?
O27 La1 O6W 129.6(5) 6_566 . ?
O2W La1 O6W 134.0(5) . . ?
O1W La1 O5W 137.8(5) . . ?
O4W La1 O5W 80.7(5) . . ?
O25 La1 O5W 72.3(5) . . ?
O3W La1 O5W 138.4(5) . . ?
O28 La1 O5W 134.8(5) 6_556 . ?
O27 La1 O5W 69.2(5) 6_566 . ?
O2W La1 O5W 80.2(5) . . ?
O6W La1 O5W 72.4(5) . . ?
O19 Mn1 O15 92.7(6) . . ?
O19 Mn1 O9 175.2(6) . 7 ?
O15 Mn1 O9 90.1(6) . 7 ?
O19 Mn1 O8 91.9(6) . 7 ?
O15 Mn1 O8 172.8(6) . 7 ?
O9 Mn1 O8 84.9(6) 7 7 ?
O19 Mn1 O20 89.5(6) . . ?
O15 Mn1 O20 89.3(6) . . ?
O9 Mn1 O20 94.4(6) 7 . ?
O8 Mn1 O20 96.2(6) 7 . ?
O19 Mn1 O1 89.9(6) . . ?
O15 Mn1 O1 87.6(5) . . ?
O9 Mn1 O1 86.3(5) 7 . ?
O8 Mn1 O1 86.9(5) 7 . ?
O20 Mn1 O1 176.8(6) . . ?
O19 Mn1 Mn2 133.1(4) . . ?
O15 Mn1 Mn2 86.0(4) . . ?
O9 Mn1 Mn2 43.2(4) 7 . ?
O8 Mn1 Mn2 86.8(4) 7 . ?
O20 Mn1 Mn2 137.2(4) . . ?
O1 Mn1 Mn2 43.2(4) . . ?
O19 Mn1 Mn2 88.4(4) . 7 ?
O15 Mn1 Mn2 132.1(4) . 7 ?
O9 Mn1 Mn2 86.9(4) 7 7 ?
O8 Mn1 Mn2 42.6(4) 7 7 ?
O20 Mn1 Mn2 138.6(4) . 7 ?
O1 Mn1 Mn2 44.5(4) . 7 ?
Mn2 Mn1 Mn2 60.25(11) . 7 ?
O18 Mn2 O17 95.9(6) . 7 ?
O18 Mn2 O1 90.5(6) . . ?
O17 Mn2 O1 173.6(6) 7 . ?
O18 Mn2 O9 92.4(6) . 7 ?
O17 Mn2 O9 94.5(6) 7 7 ?
O1 Mn2 O9 86.0(5) . 7 ?
O18 Mn2 O8 93.3(6) . . ?
O17 Mn2 O8 90.2(5) 7 . ?
O1 Mn2 O8 88.6(5) . . ?
O9 Mn2 O8 172.2(5) 7 . ?
O18 Mn2 O1 177.5(6) . 7 ?
O17 Mn2 O1 86.3(5) 7 7 ?
O1 Mn2 O1 87.3(6) . 7 ?
O9 Mn2 O1 88.7(5) 7 7 ?
O8 Mn2 O1 85.4(5) . 7 ?
O18 Mn2 Mn1 89.6(4) . . ?
O17 Mn2 Mn1 136.6(4) 7 . ?
O1 Mn2 Mn1 44.0(4) . . ?
O9 Mn2 Mn1 42.1(4) 7 . ?
O8 Mn2 Mn1 132.5(4) . . ?
O1 Mn2 Mn1 89.7(4) 7 . ?
O18 Mn2 Mn2 135.1(4) . 7 ?
O17 Mn2 Mn2 129.0(4) 7 7 ?
O1 Mn2 Mn2 44.6(4) . 7 ?
O9 Mn2 Mn2 86.4(4) 7 7 ?
O8 Mn2 Mn2 85.8(4) . 7 ?
O1 Mn2 Mn2 42.7(4) 7 7 ?
Mn1 Mn2 Mn2 60.49(11) . 7 ?
O18 Mn2 Mn1 135.5(4) . 7 ?
O17 Mn2 Mn1 84.8(4) 7 7 ?
O1 Mn2 Mn1 90.0(4) . 7 ?
O9 Mn2 Mn1 132.0(4) 7 7 ?
O8 Mn2 Mn1 42.3(4) . 7 ?
O1 Mn2 Mn1 43.3(4) 7 7 ?
Mn1 Mn2 Mn1 119.75(11) . 7 ?
Mn2 Mn2 Mn1 59.26(11) 7 7 ?
Mn3 Mn3 O9W 139.1(10) 2 . ?
Mn3 Mn3 O7W 113.3(7) 2 . ?
O9W Mn3 O7W 101.0(9) . . ?
Mn3 Mn3 O8W 62.3(5) 2 . ?
O9W Mn3 O8W 84.3(8) . . ?
O7W Mn3 O8W 174.6(9) . . ?
Si1 O1 Mn2 123.9(8) . . ?
Si1 O1 Mn1 124.2(8) . . ?
Mn2 O1 Mn1 92.8(5) . . ?
Si1 O1 Mn2 122.1(8) . 7 ?
Mn2 O1 Mn2 92.7(6) . 7 ?
Mn1 O1 Mn2 92.2(5) . 7 ?
W3 O3 W2 124.0(8) . . ?
W3 O4 W7 121.1(7) . . ?
W8 O5 W5 122.1(7) . . ?
W6 O6 W8 151.4(8) . . ?
W8 O7 W1 121.6(7) . . ?
W7 O8 Mn1 127.4(7) . 7 ?
W7 O8 Mn2 133.1(8) . . ?
Mn1 O8 Mn2 95.1(6) 7 . ?
W1 O9 Mn1 130.4(7) . 7 ?
W1 O9 Mn2 131.2(8) . 7 ?
Mn1 O9 Mn2 94.7(6) 7 7 ?
W5 O11 W9 146.9(9) . . ?
W6 O12 W9 121.2(8) . . ?
Si1 O13 W5 124.1(8) . . ?
Si1 O13 W1 123.9(8) . . ?
W5 O13 W1 91.8(5) . . ?
Si1 O13 W8 125.0(8) . . ?
W5 O13 W8 91.5(5) . . ?
W1 O13 W8 90.6(5) . . ?
W6 O14 W3 151.4(8) . . ?
W4 O15 Mn1 135.3(8) . . ?
W8 O16 W3 146.9(8) . . ?
W5 O17 Mn2 136.9(8) . 7 ?
W2 O18 Mn2 135.5(8) . . ?
W9 O19 Mn1 137.3(8) . . ?
Si1 O21 W4 124.7(8) . . ?
Si1 O21 W9 123.3(8) . . ?
W4 O21 W9 92.0(5) . . ?
Si1 O21 W6 125.6(8) . . ?
W4 O21 W6 91.1(5) . . ?
W9 O21 W6 90.2(5) . . ?
Si1 O22 W7 125.1(8) . . ?
Si1 O22 W2 123.2(8) . . ?
W7 O22 W2 92.7(5) . . ?
Si1 O22 W3 124.6(8) . . ?
W7 O22 W3 91.0(5) . . ?
W2 O22 W3 90.2(5) . . ?
W4 O23 W2 150.7(9) . . ?
W4 O25 La1 164.4(9) . . ?
W7 O26 W2 121.3(7) . . ?
W7 O27 La1 156.9(8) . 6_565 ?
W5 O28 La1 139.1(7) . 6 ?
W6 O31 W4 121.0(8) . . ?
W9 O32 W4 117.2(7) . . ?
W7 O34 W1 147.0(8) . . ?
W1 O35 W5 119.3(7) . . ?
Mn3 O8W Mn3 55.4(9) 2 . ?
O1 Si1 O22 109.9(8) . . ?
O1 Si1 O21 109.7(8) . . ?
O22 Si1 O21 108.7(8) . . ?
O1 Si1 O13 111.6(8) . . ?
O22 Si1 O13 108.5(8) . . ?
O21 Si1 O13 108.3(8) . . ?
O10 W1 O9 101.8(7) . . ?
O10 W1 O35 101.7(7) . . ?
O9 W1 O35 93.4(6) . . ?
O10 W1 O34 99.1(7) . . ?
O9 W1 O34 91.2(6) . . ?
O35 W1 O34 157.3(6) . . ?
O10 W1 O7 95.1(7) . . ?
O9 W1 O7 163.0(6) . . ?
O35 W1 O7 84.7(6) . . ?
O34 W1 O7 84.4(6) . . ?
O10 W1 O13 168.8(6) . . ?
O9 W1 O13 88.8(6) . . ?
O35 W1 O13 73.9(5) . . ?
O34 W1 O13 84.0(6) . . ?
O7 W1 O13 74.4(5) . . ?
O30 W2 O18 104.1(7) . . ?
O30 W2 O23 103.6(7) . . ?
O18 W2 O23 93.3(6) . . ?
O30 W2 O26 100.6(7) . . ?
O18 W2 O26 91.3(6) . . ?
O23 W2 O26 153.4(6) . . ?
O30 W2 O3 95.1(7) . . ?
O18 W2 O3 160.5(6) . . ?
O23 W2 O3 85.1(6) . . ?
O26 W2 O3 81.9(6) . . ?
O30 W2 O22 166.2(6) . . ?
O18 W2 O22 87.7(6) . . ?
O23 W2 O22 82.4(6) . . ?
O26 W2 O22 71.6(5) . . ?
O3 W2 O22 72.8(6) . . ?
O33 W3 O3 102.6(7) . . ?
O33 W3 O4 101.5(7) . . ?
O3 W3 O4 92.4(7) . . ?
O33 W3 O14 100.8(7) . . ?
O3 W3 O14 87.6(6) . . ?
O4 W3 O14 157.2(6) . . ?
O33 W3 O16 101.1(7) . . ?
O3 W3 O16 156.3(6) . . ?
O4 W3 O16 82.4(6) . . ?
O14 W3 O16 88.5(6) . . ?
O33 W3 O22 172.6(6) . . ?
O3 W3 O22 73.0(6) . . ?
O4 W3 O22 73.1(6) . . ?
O14 W3 O22 85.1(6) . . ?
O16 W3 O22 83.4(5) . . ?
O25 W4 O15 103.0(7) . . ?
O25 W4 O23 101.3(7) . . ?
O15 W4 O23 93.8(7) . . ?
O25 W4 O32 98.3(7) . . ?
O15 W4 O32 91.6(6) . . ?
O23 W4 O32 157.9(6) . . ?
O25 W4 O31 94.2(7) . . ?
O15 W4 O31 162.5(6) . . ?
O23 W4 O31 86.0(6) . . ?
O32 W4 O31 82.6(6) . . ?
O25 W4 O21 167.8(6) . . ?
O15 W4 O21 87.8(6) . . ?
O23 W4 O21 83.6(6) . . ?
O32 W4 O21 75.3(6) . . ?
O31 W4 O21 74.8(6) . . ?
O28 W5 O17 102.5(7) . . ?
O28 W5 O11 101.1(7) . . ?
O17 W5 O11 93.9(7) . . ?
O28 W5 O35 98.1(6) . . ?
O17 W5 O35 91.1(6) . . ?
O11 W5 O35 158.5(6) . . ?
O28 W5 O5 96.5(6) . . ?
O17 W5 O5 160.7(6) . . ?
O11 W5 O5 85.7(6) . . ?
O35 W5 O5 82.7(6) . . ?
O28 W5 O13 168.5(6) . . ?
O17 W5 O13 86.7(6) . . ?
O11 W5 O13 85.0(6) . . ?
O35 W5 O13 74.5(5) . . ?
O5 W5 O13 74.1(5) . . ?
O24 W6 O12 102.0(7) . . ?
O24 W6 O31 101.5(7) . . ?
O12 W6 O31 92.6(6) . . ?
O24 W6 O6 101.4(7) . . ?
O12 W6 O6 86.2(6) . . ?
O31 W6 O6 156.8(7) . . ?
O24 W6 O14 100.3(6) . . ?
O12 W6 O14 157.6(7) . . ?
O31 W6 O14 85.6(6) . . ?
O6 W6 O14 86.8(6) . . ?
O24 W6 O21 173.2(6) . . ?
O12 W6 O21 74.7(6) . . ?
O31 W6 O21 73.0(6) . . ?
O6 W6 O21 84.5(6) . . ?
O14 W6 O21 83.5(6) . . ?
O27 W7 O8 103.4(7) . . ?
O27 W7 O34 99.3(6) . . ?
O8 W7 O34 93.8(6) . . ?
O27 W7 O26 99.8(6) . . ?
O8 W7 O26 91.6(6) . . ?
O34 W7 O26 158.3(6) . . ?
O27 W7 O4 94.4(6) . . ?
O8 W7 O4 162.2(6) . . ?
O34 W7 O4 84.5(6) . . ?
O26 W7 O4 84.0(6) . . ?
O27 W7 O22 167.4(6) . . ?
O8 W7 O22 87.7(6) . . ?
O34 W7 O22 85.5(6) . . ?
O26 W7 O22 73.7(6) . . ?
O4 W7 O22 74.5(5) . . ?
O2 W8 O5 101.0(6) . . ?
O2 W8 O16 102.4(6) . . ?
O5 W8 O16 156.5(6) . . ?
O2 W8 O7 99.9(7) . . ?
O5 W8 O7 89.2(6) . . ?
O16 W8 O7 84.5(6) . . ?
O2 W8 O6 102.9(7) . . ?
O5 W8 O6 87.6(6) . . ?
O16 W8 O6 89.4(6) . . ?
O7 W8 O6 157.1(6) . . ?
O2 W8 O13 170.2(6) . . ?
O5 W8 O13 72.3(5) . . ?
O16 W8 O13 84.2(5) . . ?
O7 W8 O13 73.3(5) . . ?
O6 W8 O13 84.2(6) . . ?
O29 W9 O19 103.4(7) . . ?
O29 W9 O32 98.6(7) . . ?
O19 W9 O32 91.4(6) . . ?
O29 W9 O11 101.6(6) . . ?
O19 W9 O11 95.1(6) . . ?
O32 W9 O11 156.7(6) . . ?
O29 W9 O12 96.1(7) . . ?
O19 W9 O12 160.2(6) . . ?
O32 W9 O12 82.8(6) . . ?
O11 W9 O12 83.6(6) . . ?
O29 W9 O21 168.2(6) . . ?
O19 W9 O21 86.5(6) . . ?
O32 W9 O21 74.5(6) . . ?
O11 W9 O21 83.5(5) . . ?
O12 W9 O21 73.7(5) . . ?
 
_refine_diff_density_max    7.233
_refine_diff_density_min   -6.413
_refine_diff_density_rms    0.936

_shelxl_version_number 2014/6

_shelx_res_file
;
TITL 1 in P-1                    New: C2/c
CELL  0.71073   33.0900   12.8044   22.8273    90.000    91.346    90.000
ZERR 2           0.0020    0.0010    0.0017     0.000     0.001     0.000
LATT 7
SYMM             - X ,              Y ,    0.50000 - Z
SFAC
SFAC K   8.2186 12.7949  7.4398  0.7748  1.0519 213.1872  0.8659 41.6842  =
        1.4228  0.2009  0.2494 1050.0000 1.330 39.10000
SFAC
SFAC La 20.5780  2.9482 19.5990  0.2445 11.3727 18.7726  3.2872 133.1241  =
        2.1468 -0.2871  2.4523 10400.0000 1.870 138.91000
SFAC
SFAC Mn 11.2819  5.3409  7.3573  0.3432  3.0193 17.8674  2.2441 83.7544  =
        1.0896  0.3368  0.7283 3020.0000 1.400 54.94000
SFAC
SFAC O   3.0485 13.2771  2.2868  5.7011  1.5463  0.3239  0.8670 32.9089  =
        0.2508  0.0106  0.0060 32.5000 0.680 16.00000
SFAC
SFAC Si  6.2915  2.4386  3.0353 32.3337  1.9891  0.6785  1.5410 81.6938  =
        1.1407  0.0817  0.0704 310.0000 1.200 28.09000
SFAC
SFAC W  29.0818  1.7203 15.4300  9.2259 14.4327  0.3217  5.1198 57.0561  =
        9.8875 -0.8490  6.8722 28600.0000 1.370 183.84000
UNIT 12 8 18 412 8 72
omit     2   0   0
omit     4   0  16
omit     2   0  16
omit    21   3   5
omit    20   4   5
omit     3   1  16
omit    22   2   6
omit     4   0   0
omit     6   2   5
omit     2   4   0
omit     6   0   0
omit   -10   2   8
omit    -1   1   2
omit     6   4   2
omit    -4   0   2
omit     3   1   5
omit   -13   1   2
omit    -4   4   6
omit     1   1   2
omit     3   1   2
omit     1   1   6
omit   -10   0   2
omit   -13   1   1
omit    12   0   6
omit    10   0   0
omit   -14  16   3
omit    -2   6   4
omit    34   8   6
omit    21   3   6
omit    -1   3   3
omit    42   0   0
omit     4   0   2
omit   -41   1   3
omit    -6   6   2
omit    2   4   9
omit   -40   0   2
omit   -12   0   2
omit     8   2   3
omit    13   7   1
omit    29   9  12
omit   -39   1   2
omit   -20  14   8
omit  -37   1   2
omit    23   1   6
omit    15   1   0
omit   -38   0  14
omit   -8   0   2
omit    11   1   0
omit     39   1   1
L.S. 39
ACTA
BOND $H
FMAP 2
PLAN 10
simu 0.005 0.01 3.8 $o $si $Mn
isor 0.01 $mn
eadp mn1 mn2
size 0.15 0.21 0.24
TEMP    23
WGHT    0.129700
FVAR       0.01207
K1    1    0.077287    0.486351    0.396664    11.00000    0.04453    0.02816 =
         0.05131   -0.00142    0.00632    0.00023
K2    1    0.040294    0.034996    0.533942    10.50000    0.05017    0.02178 =
         0.04298    0.00172   -0.00681   -0.00046
LA1   2    0.164633    0.227301    0.377132    11.00000    0.01922    0.00250 =
         0.01268    0.00030   -0.00370   -0.00049
MN1   3    0.245527    0.117628    0.096344    11.00000    0.02007    0.00207 =
         0.01368   -0.00004   -0.00329    0.00142
MN2   3    0.261116    0.345266    0.043858    11.00000    0.02007    0.00207 =
         0.01368   -0.00004   -0.00329    0.00142
MN3   3    0.023273    0.936312    0.281788    10.25000    0.04717    0.00671 =
         0.01306    0.00195   -0.01264    0.00389
O1    4    0.212750    0.228609    0.037345    11.00000    0.02048    0.00442 =
         0.01527   -0.00013   -0.00365    0.00141
O2    4    0.017175    0.252434   -0.056288    11.00000    0.01436    0.00927 =
         0.01629    0.00158   -0.00853    0.00312
O3    4    0.128775    0.515369    0.124632    11.00000    0.02608    0.00981 =
         0.01948   -0.00222   -0.00433    0.00253
O4    4    0.120777    0.544114    0.007987    11.00000    0.02318    0.00735 =
         0.01738   -0.00019   -0.00372    0.00193
O5    4    0.080020    0.107012   -0.056757    11.00000    0.01911    0.00643 =
         0.01575   -0.00090   -0.00403    0.00086
O6    4    0.063400    0.192640    0.045711    11.00000    0.02065    0.00764 =
         0.01620   -0.00060   -0.00404    0.00157
O7    4    0.092714    0.297117   -0.102555    11.00000    0.01970    0.00718 =
         0.01676   -0.00028   -0.00480    0.00133
O8    4    0.226138    0.443728   -0.017904    11.00000    0.02125    0.00496 =
         0.01572   -0.00093   -0.00421    0.00189
O9    4    0.205829    0.270663   -0.097220    11.00000    0.01944    0.00515 =
         0.01552   -0.00063   -0.00481    0.00138
O10   4    0.151795    0.331495   -0.183312    11.00000    0.02542    0.00966 =
         0.01554    0.00254   -0.00594    0.00367
O11   4    0.125520    0.016174    0.024771    11.00000    0.02073    0.00621 =
         0.01648   -0.00070   -0.00321    0.00082
O12   4    0.087683    0.059896    0.123969    11.00000    0.02273    0.00761 =
         0.01822   -0.00132   -0.00432    0.00190
O13   4    0.140037    0.221160   -0.017457    11.00000    0.02078    0.00580 =
         0.01646   -0.00079   -0.00398    0.00145
O14   4    0.082136    0.349562    0.115265    11.00000    0.02284    0.00827 =
         0.01738    0.00027   -0.00366    0.00317
O15   4    0.219007    0.195793    0.167677    11.00000    0.02288    0.00614 =
         0.01648   -0.00085   -0.00282    0.00185
O16   4    0.076926    0.382774   -0.002783    11.00000    0.02116    0.00739 =
         0.01755   -0.00140   -0.00531    0.00240
O17   4    0.189455    0.047630   -0.041002    11.00000    0.01932    0.00545 =
         0.01592   -0.00051   -0.00474    0.00136
O18   4    0.234128    0.412217    0.118413    11.00000    0.02370    0.00655 =
         0.01722   -0.00129   -0.00398    0.00179
O19   4    0.197763    0.012820    0.088121    11.00000    0.02093    0.00518 =
         0.01609   -0.00049   -0.00242    0.00157
O20   4    0.275930    0.010691    0.158813    11.00000    0.02820    0.00569 =
         0.01731    0.00033   -0.00283    0.00395
O21   4    0.146348    0.194334    0.097654    11.00000    0.02159    0.00604 =
         0.01612   -0.00103   -0.00404    0.00174
O22   4    0.159510    0.381324    0.051364    11.00000    0.02156    0.00572 =
         0.01644   -0.00087   -0.00376    0.00188
O23   4    0.167175    0.353794    0.175344    11.00000    0.02431    0.00848 =
         0.01787   -0.00145   -0.00372    0.00212
O24   4    0.026325    0.200892    0.156738    11.00000    0.02304    0.00629 =
         0.01867    0.00073    0.00408    0.00234
O25   4    0.175313    0.216088    0.268860    11.00000    0.02544    0.00984 =
         0.01771   -0.00093   -0.00403    0.00103
O26   4    0.191740    0.561330    0.063413    11.00000    0.02313    0.00656 =
         0.01642   -0.00229   -0.00376    0.00221
O27   4    0.184976    0.620766   -0.054481    11.00000    0.02348    0.00647 =
         0.01649   -0.00150   -0.00461    0.00324
O28   4    0.126746   -0.065925   -0.088796    11.00000    0.01891    0.00742 =
         0.01775    0.00043   -0.00312    0.00141
O29   4    0.136748   -0.122431    0.122690    11.00000    0.02508    0.00972 =
         0.01832   -0.00157   -0.00297    0.00311
O30   4    0.199062    0.562013    0.187059    11.00000    0.02927    0.00958 =
         0.02011   -0.00407   -0.00337    0.00161
O31   4    0.107748    0.222148    0.195711    11.00000    0.02326    0.00880 =
         0.01801   -0.00121   -0.00383    0.00212
O32   4    0.156858    0.060159    0.184129    11.00000    0.02315    0.00769 =
         0.01687   -0.00181   -0.00430    0.00105
O33   4    0.051982    0.542341    0.074892    11.00000    0.02949    0.00638 =
         0.02031    0.00121   -0.00476    0.00235
O34   4    0.153309    0.422848   -0.071788    11.00000    0.02141    0.00653 =
         0.01665   -0.00032   -0.00442    0.00264
O35   4    0.142874    0.141082   -0.121857    11.00000    0.01942    0.00636 =
         0.01675   -0.00084   -0.00447    0.00099
O1W   4    0.204521    0.070537    0.348792    11.00000    0.03150    0.01232 =
         0.02133    0.00265   -0.00749    0.00049
O2W   4    0.234750    0.300217    0.352373    11.00000    0.02850    0.00930 =
         0.02119   -0.00398   -0.00552   -0.00160
O3W   4    0.206998    0.160401    0.462923    11.00000    0.03426    0.00910 =
         0.02349   -0.00009   -0.00348   -0.00251
O4W   4    0.109486    0.276094    0.445195    11.00000    0.03375    0.01685 =
         0.02993   -0.00350    0.00387   -0.00317
O5W   4    0.143150    0.408205    0.330525    11.00000    0.03234    0.01359 =
         0.02425   -0.00095   -0.00195   -0.00001
O6W   4    0.098117    0.197734    0.317069    11.00000    0.03214    0.02188 =
         0.02830    0.00182   -0.00249    0.00089
O7W   4    0.045334    0.777287    0.304677    11.00000    0.06381    0.03463 =
         0.03723    0.00245   -0.00723    0.00092
O8W   4    0.000000    1.091710    0.250000    10.50000    0.05715    0.01660 =
         0.02207    0.00000   -0.01079    0.00000
O9W   4    0.041748    1.023326    0.360219    11.00000    0.06846    0.02975 =
         0.03332   -0.00177   -0.01959    0.00663
O10W  4    0.201483    0.767586    0.074906    11.00000    0.02473    0.00861 =
         0.01785   -0.00209   -0.00373    0.00391
O11W  4    0.017468    0.395709    0.458176    11.00000    0.04150    0.02416 =
         0.03745   -0.00073    0.00095   -0.00024
O12W  4    0.037524    0.175547    0.444578    11.00000    0.04077    0.02464 =
         0.03669   -0.00041   -0.00148   -0.00128
O13W  4    0.031469    0.343565    0.323896    11.00000    0.04173    0.02556 =
         0.03653   -0.00071   -0.00183    0.00020
O14W  4    0.092020    0.438936    0.240949    11.00000    0.03139    0.01641 =
         0.02385   -0.00224   -0.00429    0.00404
O15W  4    0.112867    0.665800    0.212341    11.00000    0.04039    0.02393 =
         0.02704   -0.00519   -0.00789    0.00941
O16W  4    0.280401    0.475795    0.255437    11.00000    0.03073    0.01459 =
         0.02267   -0.00335   -0.00357   -0.00230
O17W  4    0.274727    0.252194    0.253526    11.00000    0.02862    0.01389 =
         0.02026   -0.00193   -0.00452   -0.00024
SI1   5    0.165386    0.255924    0.041826    11.00000    0.01886    0.00393 =
         0.01442   -0.00031   -0.00319    0.00192
W1    6    0.152491    0.288163   -0.111711    11.00000    0.01735    0.00467 =
         0.01242   -0.00047   -0.00408    0.00146
W2    6    0.187412    0.473357    0.132825    11.00000    0.02094    0.00325 =
         0.01293   -0.00208   -0.00344   -0.00050
W3    6    0.093910    0.467880    0.065373    11.00000    0.01945    0.00513 =
         0.01581   -0.00063   -0.00150    0.00157
W4    6    0.168543    0.212847    0.193039    11.00000    0.02081    0.00639 =
         0.01102    0.00005   -0.00247    0.00133
W5    6    0.136764    0.052305   -0.052539    11.00000    0.01805    0.00360 =
         0.01644   -0.00363   -0.00235   -0.00079
W6    6    0.075357    0.202538    0.127512    11.00000    0.01967    0.00730 =
         0.01574   -0.00014   -0.00163   -0.00039
W7    6    0.178341    0.508503   -0.013639    11.00000    0.01797    0.00098 =
         0.01406    0.00094   -0.00230    0.00097
W8    6    0.066925    0.244924   -0.033520    11.00000    0.01829    0.00824 =
         0.01511   -0.00198   -0.00388    0.00117
W9    6    0.145114    0.009334    0.105782    11.00000    0.02354    0.00485 =
         0.01883    0.00023   -0.00034   -0.00062
HKLF 4 1  1.0000 -2.0000  0.0000  1.0000  0.0000  0.0000  0.0000  0.0000  1.0000

REM  1 in P-1                    New: C2/c
REM R1 =  0.0793 for    7702 Fo > 4sig(Fo)  and  0.1099 for all   11449 data
REM    603 parameters refined using   1338 restraints

END

WGHT      0.1296      0.0000

REM Highest difference peak  7.233,  deepest hole -6.413,  1-sigma level  0.936
Q1    1   0.1446  0.2145  0.2016  11.00000  0.05    7.23
Q2    1   0.1759  0.2871 -0.1203  11.00000  0.05    6.68
Q3    1   0.1123  0.0454 -0.0422  11.00000  0.05    6.48
Q4    1   0.0425  0.2418 -0.0235  11.00000  0.05    6.43
Q5    1   0.1520  0.7201  0.2064  11.00000  0.05    6.37
Q6    1   0.1283  0.2850 -0.1039  11.00000  0.05    6.34
Q7    1   0.2018  0.5077 -0.0211  11.00000  0.05    6.33
Q8    1   0.1628  0.4761  0.1394  11.00000  0.05    6.15
Q9    1   0.0829  0.4064 -0.0335  11.00000  0.05    6.08
Q10   1   0.1602  0.0472 -0.0589  11.00000  0.05    5.96
;
_shelx_res_checksum   49756

_shelx_hkl_file
;
   0   0  -2  752.79    4.06
   0   0  -3    0.04    0.23
   0   0  -4  393.23    2.36
   0   0  -5    0.27    0.44
   0   0  -5   -0.12    0.61
   0   0  -6   30.79    1.19
   0   0  -6   26.19    1.85
   0   0  -7    0.35    0.55
   0   0  -7   -0.01    0.75
   0   0  -8   68.03    1.62
   0   0  -8   58.86    2.52
   0   0  -9    0.07    0.56
   0   0  -9    0.10    0.80
   0   0 -10    0.94    0.63
   0   0 -10    2.09    0.98
   0   0 -11   -0.08    0.95
   0   0 -12  732.91    9.07
   0   0  12  938.17    6.13
   0   0 -13    0.56    1.08
   0   0  13    1.59    0.87
   0   0 -14  175.40    5.17
   0   0  14  218.92    3.40
   0   0 -15    0.63    1.34
   0   0 -16  281.40    6.89
   0   0 -17    0.43    1.58
   0   0 -18   12.15    2.47
   0   0 -19   -2.43    1.51
   0   0 -20   -0.30    1.67
   0   0 -20    0.24    1.67
   0   0 -21   -1.24    1.58
   0   0 -22    2.25    1.90
   0   0 -23   -1.18    1.81
   0   0 -24    5.38    2.38
   0   0 -25   -0.56    2.01
   0   0 -26   -0.65    1.97
   0   0 -27    0.34    2.14
   0   0 -28   11.81    3.23
   0   0 -29   -0.42    2.37
   0   0 -30   12.09    3.52
   2   1   0    8.90    1.02
   2   1  -1   40.83    1.44
   2   1   1   -0.10    0.10
   2   1  -2  246.50    2.83
   2   1  -2  195.17    2.67
   2   1   2  247.71    3.09
  -2  -1  -3    1.56    0.55
   2   1  -3    2.86    0.74
   2   1  -3    2.41    0.65
   2   1   3    2.99    0.84
  -2  -1  -4   15.82    1.35
  -2  -1  -4   22.23    1.58
   2   1  -4   26.07    1.46
   2   1  -4   23.45    1.60
   2   1   4   27.93    1.79
  -2  -1  -5  135.04    2.89
  -2  -1  -5  133.90    2.61
   2   1  -5  190.83    2.63
   2   1  -5  149.09    2.95
   2   1   5  212.96    3.37
  -2  -1  -6   30.83    1.88
  -2  -1  -6   25.41    1.79
   2   1  -6   35.67    1.48
   2   1  -6   -0.05    0.19
   2   1   6   47.17    2.17
  -2  -1  -7   74.23    2.57
  -2  -1  -7   46.32    1.99
   2   1  -7   76.49    1.79
   2   1  -7   -0.05    0.23
   2   1   7  106.88    2.69
  -2  -1  -8    1.07    0.80
  -2  -1  -8    1.05    0.74
   2   1  -8    1.19    0.61
   2   1  -8    0.10    0.32
   2   1   8    1.70    0.97
  -2  -1  -9   43.64    2.38
  -2  -1  -9   18.71    1.78
   2   1  -9   17.94    1.16
   2   1  -9   -0.12    0.33
   2   1   9   61.76    2.35
  -2  -1 -10   25.28    2.23
  -2  -1 -10    7.72    1.18
   2   1 -10    0.10    0.32
   2   1  10   36.74    2.14
  -2  -1 -11   93.55    3.50
  -2  -1 -11   27.43    1.91
   2   1 -11   46.51    1.56
   2   1 -11    0.24    0.33
   2   1  11  137.47    3.25
  -2  -1 -12  201.18    5.03
  -2  -1 -12   -0.42    0.46
   2   1 -12  147.61    2.47
   2   1 -12   -0.08    0.25
   2   1  12  286.88    4.53
  -2  -1 -13   51.19    3.14
  -2  -1 -13   15.45    1.70
   2   1 -13   49.52    1.67
   2   1 -13   -0.17    0.21
   2   1  13   78.02    2.86
  -2  -1 -14  217.98    5.72
  -2  -1 -14   48.45    2.92
   2   1 -14   -0.12    0.35
   2   1  14  305.82    4.88
  -2  -1 -15   -0.69    1.34
  -2  -1 -15   -0.91    1.12
   2   1 -15   -0.26    0.28
   2   1  15    3.08    1.26
  -2  -1 -16    3.26    1.68
  -2  -1 -16    0.55    1.30
   2   1 -16    0.49    0.55
  -2  -1 -17    6.96    1.99
  -2  -1 -17    2.19    1.47
   2   1 -17    0.24    0.87
  -2  -1 -18   59.19    4.10
  -2  -1 -18   18.04    2.33
   2   1 -18   64.54    4.20
  -2  -1 -19    0.67    1.81
   2   1 -19    2.73    1.85
  -2  -1 -20   17.36    2.83
   2   1 -20   23.47    3.14
  -2  -1 -21    0.72    1.78
   2   1 -21    1.58    1.76
  -2  -1 -22    3.33    2.03
   2   1 -22    0.70    1.80
  -2  -1 -23    5.64    2.32
   2   1 -23    4.18    2.21
  -2  -1 -24   64.90    4.87
   2   1 -24   80.11    5.24
  -2  -1 -25    9.52    2.80
   2   1 -25   13.24    3.02
  -2  -1 -26  164.91    7.32
   2   1 -26  183.79    7.78
  -2  -1 -27    6.31    2.66
   2   1 -27    5.10    2.60
  -2  -1 -28    0.92    2.31
   2   1 -28    1.92    2.52
  -2  -1 -29   -0.51    2.33
   2   1 -29    1.22    2.49
  -2  -1 -30    1.21    2.52
   2   1 -30    2.06    2.60
   4   2   0 2641.18   12.90
   4   2  -1  648.50    6.49
   4   2   1  637.08    6.54
   4   2  -2  276.32    4.43
   4   2   2   -0.08    0.20
   4   2  -3  237.39    4.09
   4   2  -3  183.62    3.63
   4   2   3   -0.33    0.40
  -4  -2  -4   21.05    1.58
  -4  -2  -4   71.41    2.50
   4   2  -4   79.08    2.71
   4   2  -4   61.54    2.38
  -4  -2  -5    0.33    0.69
  -4  -2  -5    0.28    0.85
   4   2  -5    0.04    0.96
   4   2  -5   -0.27    0.40
   4   2   5   -0.43    0.61
  -4  -2  -6   -0.26    0.67
  -4  -2  -6    0.84    0.84
   4   2  -6   -0.32    0.91
   4   2  -6    0.96    0.91
   4   2   6   -0.26    0.56
  -4  -2  -7    0.93    0.79
  -4  -2  -7    1.61    0.91
   4   2  -7    1.82    0.97
   4   2  -7    2.42    0.99
   4   2   7    0.23    0.75
  -4  -2  -8   95.25    3.19
  -4  -2  -8  153.33    3.57
   4   2  -8  178.55    3.47
   4   2  -8  154.33    4.15
   4   2   8  113.32    3.42
  -4  -2  -9   11.38    1.60
  -4  -2  -9   14.22    1.65
   4   2  -9   15.78    1.73
   4   2  -9   19.08    2.07
   4   2   9   19.50    2.33
  -4  -2 -10   18.50    2.10
  -4  -2 -10   -0.39    0.45
   4   2 -10   28.32    1.87
   4   2 -10   24.32    2.43
   4   2  10   35.17    2.60
  -4  -2 -11   35.09    2.51
  -4  -2 -11   26.13    2.23
   4   2 -11   45.84    2.11
   4   2 -11   49.74    3.09
   4   2  11   56.40    2.99
  -4  -2 -12  122.30    4.20
  -4  -2 -12  143.48    3.98
   4   2 -12  132.27    3.00
   4   2 -12  179.71    5.23
   4   2  12  205.76    4.83
  -4  -2 -13  161.58    4.98
  -4  -2 -13  177.38    4.55
   4   2 -13  120.28    2.88
   4   2 -13  224.22    5.99
   4   2  13  257.16    5.43
  -4  -2 -14   22.26    2.75
  -4  -2 -14   24.62    2.73
   4   2 -14   33.22    3.13
   4   2  14   36.92    3.13
  -4  -2 -15  150.01    5.25
  -4  -2 -15  146.22    4.52
   4   2 -15  198.71    6.00
   4   2  15  244.39    5.50
  -4  -2 -16   42.99    3.50
  -4  -2 -16   47.26    3.34
   4   2 -16   60.68    4.07
   4   2  16   71.86    3.74
  -4  -2 -17   34.42    3.49
  -4  -2 -17   35.76    3.30
   4   2 -17   46.12    3.96
  -4  -2 -18    3.13    1.92
   4   2 -18    5.12    2.20
  -4  -2 -19   25.31    3.20
   4   2 -19   34.54    3.70
  -4  -2 -20    9.28    2.34
   4   2 -20   13.39    2.71
  -4  -2 -21    2.46    1.98
   4   2 -21    2.10    1.97
  -4  -2 -22   17.40    3.01
   4   2 -22   29.55    3.85
  -4  -2 -23    2.29    2.09
   4   2 -23    1.69    2.05
  -4  -2 -24   11.55    2.75
   4   2 -24   14.18    3.08
  -4  -2 -25    4.05    2.43
   4   2 -25    7.69    2.66
  -4  -2 -26    0.36    2.13
   4   2 -26    1.42    2.30
  -4  -2 -27    7.22    2.84
   4   2 -27   11.29    3.16
  -4  -2 -28   -0.71    2.19
   4   2 -28    1.71    2.59
  -4  -2 -29   18.35    3.81
   4   2 -29   19.59    3.91
   6   3   0   13.70    1.98
   6   3  -1  217.10    5.00
   6   3   1  216.62    4.99
   6   3  -2    4.29    1.56
   6   3   2   -0.22    0.46
   6   3  -3    2.06    1.46
   6   3  -3    0.16    0.96
   6   3   3    0.22    1.34
   6   3  -4   48.91    2.96
   6   3  -4   35.06    2.59
   6   3   4   45.62    3.03
   6   3  -5  419.80    6.47
   6   3  -5  328.56    6.01
   6   3   5  416.03    7.00
   6   3  -6    4.93    1.54
   6   3  -6    4.60    1.37
   6   3   6    6.19    1.75
  -6  -3  -7   33.62    2.31
   6   3  -7  122.35    3.80
   6   3  -7   98.10    3.78
   6   3   7  114.41    4.25
  -6  -3  -8   37.67    2.49
  -6  -3  -8  115.18    3.89
   6   3  -8  116.36    3.67
   6   3  -8  105.94    4.03
   6   3   8  127.63    4.51
  -6  -3  -9    8.52    1.56
  -6  -3  -9   21.31    2.52
   6   3  -9   22.84    2.36
   6   3  -9   21.06    2.61
   6   3   9   23.69    2.59
  -6  -3 -10   30.33    2.51
  -6  -3 -10   73.31    3.45
   6   3 -10   75.69    3.16
   6   3 -10   69.47    3.73
   6   3  10   77.46    3.93
  -6  -3 -11  162.69    4.92
  -6  -3 -11  334.18    6.25
   6   3 -11  358.95    5.85
   6   3 -11  330.35    7.17
   6   3  11  375.22    7.22
  -6  -3 -12   15.81    2.18
  -6  -3 -12   28.40    3.04
   6   3 -12   34.77    2.59
   6   3 -12   31.66    3.29
   6   3  12   37.28    3.46
  -6  -3 -13   16.67    2.39
  -6  -3 -13   29.79    3.14
   6   3 -13   31.03    3.35
   6   3  13   36.31    3.58
  -6  -3 -14   10.75    2.09
  -6  -3 -14   19.82    2.35
   6   3 -14   23.34    2.98
   6   3  14   24.56    2.94
  -6  -3 -15   60.81    3.90
  -6  -3 -15  109.93    4.48
   6   3 -15  112.75    5.29
   6   3  15  133.68    5.20
  -6  -3 -16    5.30    1.96
   6   3 -16    8.84    2.40
   6   3  16    8.29    2.44
  -6  -3 -17    0.30    1.54
   6   3 -17    0.56    1.86
   6   3  17   -0.57    2.06
  -6  -3 -18    6.15    2.06
   6   3 -18   14.68    2.83
  -6  -3 -19   -0.06    1.58
   6   3 -19    0.40    1.92
  -6  -3 -20    0.00    1.64
   6   3 -20    0.86    2.10
  -6  -3 -21    2.14    1.90
   6   3 -21   -0.25    2.04
  -6  -3 -22   -0.97    1.62
   6   3 -22   -0.42    2.02
  -6  -3 -23   28.36    3.86
   6   3 -23   49.41    4.78
  -6  -3 -24    9.80    2.78
   6   3 -24   18.28    3.60
  -6  -3 -25   17.57    3.33
   6   3 -25   31.55    4.50
  -6  -3 -26   13.64    3.16
   6   3 -26   27.33    4.26
  -6  -3 -27   46.89    4.79
   6   3 -27   64.55    5.67
  -6  -3 -28    1.15    2.25
   6   3 -28   -1.44    2.56
   8   4   0   53.89    3.71
   8   4  -1  455.55    8.07
   8   4   1  463.10    8.27
   8   4  -2  135.28    4.92
   8   4   2  134.82    4.91
   8   4  -3  280.59    6.49
   8   4  -3  206.38    5.51
   8   4   3    0.02    0.48
   8   4  -4   24.09    2.73
   8   4  -4   21.71    2.42
   8   4   4   29.09    3.13
   8   4  -5   15.00    2.46
   8   4  -5   13.43    2.13
   8   4   5   15.51    2.61
   8   4  -6    5.40    1.99
   8   4  -6    4.44    1.66
   8   4   6    2.72    2.07
   8   4  -7   10.98    2.17
   8   4  -7    7.52    1.98
   8   4   7    8.67    2.43
   8   4  -8  102.04    4.32
   8   4  -8   95.06    4.51
   8   4   8  106.22    4.99
   8   4  -9   13.21    2.27
   8   4  -9   12.58    2.36
   8   4   9   13.50    2.74
   8   4 -10   42.42    3.36
   8   4 -10   43.45    3.83
   8   4  10   55.41    4.24
  -8  -4 -11   14.30    2.31
   8   4 -11   59.67    3.60
   8   4 -11   47.38    3.99
   8   4  11   62.49    4.38
  -8  -4 -12    1.03    1.44
   8   4 -12    4.91    1.90
   8   4 -12    3.67    2.09
   8   4  12    3.33    2.37
  -8  -4 -13   41.14    3.31
  -8  -4 -13  143.13    5.15
   8   4 -13  132.97    5.76
   8   4  13  146.04    5.86
  -8  -4 -14   16.95    2.67
   8   4 -14   42.93    4.10
   8   4  14   48.91    4.23
  -8  -4 -15   43.08    3.47
   8   4 -15  121.50    5.75
   8   4  15  134.91    5.69
  -8  -4 -16   29.62    3.17
   8   4 -16   76.25    4.90
   8   4  16   87.52    4.94
  -8  -4 -17   49.06    3.81
   8   4 -17  124.83    6.07
   8   4  17  134.24    5.71
  -8  -4 -18    3.48    1.77
   8   4 -18    7.33    2.57
  -8  -4 -19   10.73    2.49
   8   4 -19   30.77    4.08
  -8  -4 -20    1.00    1.69
   8   4 -20    1.54    2.27
  -8  -4 -21    0.00    1.68
   8   4 -21    2.57    2.32
  -8  -4 -22    2.20    1.93
   8   4 -22    3.16    2.56
  -8  -4 -23    1.80    2.01
   8   4 -23    1.53    2.51
  -8  -4 -24    1.42    2.10
   8   4 -24    1.09    2.55
  -8  -4 -25    3.10    2.26
   8   4 -25    4.98    2.90
  -8  -4 -26    1.42    2.20
   8   4 -26   -0.95    2.54
  10   5   0   45.27    4.27
  10   5  -1   16.89    3.00
  10   5   1   16.83    3.07
  10   5  -2   61.71    4.51
  10   5   2   58.67    4.51
  10   5  -3    4.13    2.46
  10   5  -3    3.78    2.00
  10   5   3    5.40    2.48
  10   5  -4  166.55    6.12
  10   5  -4  130.02    5.28
  10   5   4  165.16    6.32
  10   5  -5   53.61    4.24
  10   5  -5   42.20    3.86
  10   5   5   51.17    4.41
  10   5  -6   12.47    2.84
  10   5  -6    8.65    2.35
  10   5   6   12.89    3.08
  10   5  -7   87.50    4.77
  10   5  -7   71.12    4.57
  10   5   7   83.00    5.20
  10   5  -8  251.96    6.92
  10   5  -8  224.92    6.95
  10   5   8  247.77    7.61
  10   5  -9   52.52    4.01
  10   5  -9   51.79    4.27
  10   5   9   50.35    4.50
  10   5 -10  374.87    8.13
  10   5 -10  339.32    8.48
  10   5  10  373.44    9.11
  10   5 -11  105.55    4.83
  10   5 -11   90.88    5.18
  10   5  11   93.34    5.34
  10   5 -12   12.50    2.73
  10   5  12   12.19    3.02
  10   5 -13   22.18    3.32
  10   5  13   22.86    3.51
  10   5 -14    3.79    2.27
  10   5  14    3.49    2.61
  10   5 -15   58.07    4.79
  10   5  15   58.13    4.75
 -10  -5 -16    4.23    1.93
  10   5 -16   18.93    3.48
  10   5  16   19.91    3.56
 -10  -5 -17   14.90    2.75
  10   5 -17   49.88    4.79
  10   5  17   55.50    4.73
 -10  -5 -18    0.77    1.73
  10   5 -18    0.09    2.30
  10   5  18    1.02    2.61
 -10  -5 -19   -0.65    1.63
  10   5 -19    5.78    2.81
 -10  -5 -20   -0.04    1.62
  10   5 -20   -1.29    2.33
 -10  -5 -21    4.15    2.09
  10   5 -21    4.33    2.89
 -10  -5 -22    4.81    2.33
  10   5 -22   22.00    4.03
 -10  -5 -23    0.17    1.89
  10   5 -23    7.34    3.32
 -10  -5 -24    5.16    2.34
  10   5 -24   15.42    3.98
  12   6   0  101.56    5.59
  12   6  -1   14.79    3.24
  12   6   1   13.42    3.16
  12   6  -2   31.81    3.95
  12   6  -2   29.67    3.57
  12   6   2   33.47    4.15
  12   6  -3   -0.58    2.36
  12   6  -3   -2.05    1.70
  12   6   3   -0.89    2.32
  12   6  -4  136.30    6.05
  12   6  -4  113.76    5.47
  12   6   4  130.92    6.23
  12   6  -5   27.61    3.69
  12   6  -5   22.77    3.23
  12   6   5   30.57    4.05
  12   6  -6   17.60    3.15
  12   6  -6   17.67    3.01
  12   6   6   18.73    3.54
  12   6  -7    4.93    2.45
  12   6  -7    6.22    2.39
  12   6   7    2.50    2.70
  12   6  -8    9.90    2.73
  12   6  -8    7.52    2.58
  12   6   8   11.78    3.24
  12   6  -9    3.23    2.36
  12   6  -9    0.71    2.13
  12   6   9    3.22    2.79
  12   6 -10    2.68    2.36
  12   6 -10   -0.28    2.12
  12   6  10   -1.00    2.47
  12   6 -11    0.28    2.18
  12   6  11    2.71    2.75
  12   6 -12   36.85    4.42
  12   6  12   40.71    4.57
  12   6 -13    7.46    2.83
  12   6  13    4.33    2.89
  12   6 -14   20.57    3.59
  12   6  14   19.33    3.72
  12   6 -15    7.11    2.92
  12   6  15    5.34    3.08
  12   6 -16  174.14    7.71
  12   6  16  172.56    7.54
  12   6 -17  120.84    6.85
  12   6  17  123.49    6.70
  12   6 -18    1.12    2.66
  12   6  18    3.30    3.07
  12   6 -19   20.98    4.17
  12   6 -20   -0.28    2.68
  12   6 -21   -2.31    2.62
  14   7   0   38.05    4.62
  14   7  -1    8.84    3.14
  14   7  -1    6.59    2.57
  14   7   1    5.01    3.01
  14   7  -2   18.85    3.65
  14   7  -2   20.26    3.28
  14   7   2   26.97    4.21
  14   7  -3    2.45    2.76
  14   7  -3    2.62    2.22
  14   7   3    0.66    2.63
  14   7  -4   29.59    4.14
  14   7  -4   21.43    3.52
  14   7   4   30.00    4.35
  14   7  -5    6.38    2.91
  14   7  -5    5.79    2.63
  14   7   5    5.38    3.02
  14   7  -6    7.41    2.91
  14   7  -6    6.14    2.65
  14   7   6    7.88    3.20
  14   7  -7    4.97    2.72
  14   7  -7    1.97    2.42
  14   7   7   -0.34    2.74
  14   7  -8   50.38    4.64
  14   7  -8   44.19    4.59
  14   7   8   49.79    5.11
  14   7  -9   21.37    3.65
  14   7  -9   21.96    3.76
  14   7   9   19.36    4.02
  14   7 -10  184.53    7.75
  14   7  10  178.34    7.98
  14   7 -11    7.98    3.13
  14   7  11    8.80    3.52
  14   7 -12   -1.32    2.41
  14   7  12    0.94    2.95
  14   7 -13    0.21    2.64
  14   7  13    2.31    3.09
  14   7 -14   29.00    4.49
  14   7  14   28.88    4.65
  14   7 -15   22.03    4.13
  14   7  15   15.38    4.14
  14   7 -16   12.69    3.70
  14   7 -17   54.24    5.81
  16   8   0    7.05    3.40
  16   8  -1   22.76    4.27
  16   8   1   22.15    4.36
  16   8  -2   23.61    4.30
  16   8  -3   30.62    4.60
  16   8  -4   46.97    5.19
  16   8  -5    9.39    3.43
  16   8  -5    4.06    2.89
  16   8  -6    0.52    2.93
  16   8  -6    4.17    2.98
  16   8  -7    1.33    2.93
  16   8  -7   -0.12    2.61
  16   8  -8    3.22    3.12
  16   8  -8   -1.18    2.63
  16   8  -9    2.33    2.96
  16   8 -10   -3.19    2.58
  -1  -1 -30    5.38    2.82
   1   0 -30   -0.70    2.42
  -1  -1 -29   18.31    3.66
   1   0 -29   20.77    3.86
  -1  -1 -28    3.97    2.58
   1   0 -28    6.33    2.77
  -1  -1 -27    3.77    2.46
   1   0 -27    2.19    2.33
  -1  -1 -26    0.87    2.14
   1   0 -26    1.79    2.19
  -1  -1 -25   12.94    2.94
   1   0 -25   13.65    3.07
  -1  -1 -24    2.34    2.15
   1   0 -24   -0.58    1.91
  -1  -1 -23   20.64    3.27
   1   0 -23   27.63    3.69
  -1  -1 -22   76.63    4.86
   1   0 -22   79.75    5.02
  -1  -1 -21   45.37    3.96
   1   0 -21   50.56    4.14
  -1  -1 -20  101.04    5.15
  -1  -1 -20   29.02    3.39
   1   0 -20  101.55    5.19
  -1  -1 -19    0.15    1.69
  -1  -1 -19    2.11    1.73
   1   0 -19   -0.16    1.71
  -1  -1 -18    0.41    1.65
  -1  -1 -18    0.76    1.50
   1   0 -18    1.58    1.70
  -1  -1 -17   83.98    4.36
  -1  -1 -17   26.86    3.05
   1   0 -17   89.03    4.48
  -1  -1 -16   12.42    2.17
  -1  -1 -16    4.12    1.56
   1   0 -16   13.30    2.24
  -1  -1 -15    1.51    1.37
  -1  -1 -15   -0.14    1.17
   1   0 -15    0.43    1.39
   1   1  14   58.21    2.31
  -1  -1 -14   43.00    3.01
  -1  -1 -14   14.14    1.76
   1   0 -14   48.14    3.20
   1   1  13   67.37    2.35
  -1  -1 -13   50.35    3.02
  -1  -1 -13   16.05    1.77
   1   0 -13   52.97    3.11
   1   1  12  273.93    3.76
  -1  -1 -12  200.27    4.97
  -1  -1 -12   66.35    2.90
   1   0 -12  202.15    5.05
   1   1  11   18.29    1.67
  -1  -1 -11   12.41    1.65
  -1  -1 -11   -0.02    0.44
   1   0 -11   14.17    1.75
   1   1  10    9.55    1.08
  -1  -1 -10    5.55    1.23
  -1  -1 -10    3.10    0.97
   1   0 -10    8.11    1.42
   1   1   9    7.94    0.99
  -1  -1  -9    5.98    1.17
  -1  -1  -9    2.24    0.87
   1   0  -9    6.19    1.21
   1   1   8   55.38    1.85
  -1  -1  -8   39.25    2.18
  -1  -1  -8   15.26    1.39
   1   0  -8   40.48    2.25
   1   1   7    1.03    0.74
  -1  -1  -7    0.54    0.75
  -1  -1  -7   -0.33    0.72
   1   0  -7    0.16    0.80
   1   1   6   66.57    1.86
  -1  -1  -6   46.85    2.04
  -1  -1  -6   13.79    1.21
   1   0  -6   56.06    2.27
   1   1   5  191.73    2.50
  -1  -1  -5  140.08    2.72
  -1  -1  -5   23.78    1.58
   1   0  -5  154.41    2.96
   1   1   4   53.16    1.42
  -1  -1  -4   39.65    1.50
   1   0  -4   44.36    0.93
   1   0  -4   40.04    1.48
   1   1   3    6.64    0.63
   1   0  -3    6.58    0.58
   1   1   2   45.06    1.06
   1   0  -2   44.65    0.84
   1   1   1   88.23    1.27
   1   0  -1  181.99    1.62
   1   1   0    0.27    0.18
   1   0   0    0.26    0.23
   1   1  -1  725.30    3.48
   1   0   1    0.02    0.08
   1   1  -2    3.21    0.42
   1   0   2    2.68    0.45
   1   1  -3   16.42    0.83
   1   0   3   22.14    1.10
  -1   0  -4    2.44    0.62
   1   1  -4    1.78    0.52
   1   1  -4    2.90    0.57
   1   0   4    2.61    0.69
  -1   0  -5  115.10    2.61
   1   1  -5   58.56    1.47
   1   1  -5    0.16    0.20
   1   0   5  155.59    2.54
  -1   0  -6    3.61    0.90
   1   1  -6    1.04    0.61
   1   1  -6    0.01    0.12
   1   0   6    4.51    0.98
  -1   0  -7   46.52    2.18
  -1   0  -7   13.05    1.50
   1   1  -7   15.73    1.12
   1   1  -7   -0.02    0.15
   1   0   7   62.38    2.08
  -1   0  -8   48.88    2.33
  -1   0  -8   16.07    1.60
   1   1  -8   27.54    1.27
   1   1  -8   -0.10    0.17
   1   0   8   66.29    2.15
  -1   0  -9    1.51    0.90
  -1   0  -9    0.50    0.74
   1   1  -9    1.55    0.61
   1   1  -9   -0.13    0.17
   1   0   9    1.27    0.87
  -1   0 -10    7.72    1.34
  -1   0 -10    2.56    0.86
   1   1 -10    8.90    0.91
   1   1 -10   -0.18    0.14
   1   0  10    9.34    1.17
  -1   0 -11    0.26    0.95
  -1   0 -11    0.86    0.84
   1   1 -11    0.84    0.64
   1   1 -11    0.03    0.21
   1   0  11    0.60    0.90
  -1   0 -12  768.82    9.35
  -1   0 -12   91.60    2.77
   1   1 -12  803.80    5.77
   1   1 -12    0.03    0.34
   1   0  12 1029.48    7.55
  -1   0 -13  411.58    7.24
   1   1 -13  447.35    4.50
   1   1 -13    0.53    0.65
   1   0  13  543.95    5.76
  -1   0 -14  519.36    8.46
  -1   0 -14  168.25    4.27
   1   1 -14  618.00    5.38
   1   0  14  714.32    6.68
  -1   0 -15   32.08    3.01
  -1   0 -15    8.78    1.55
   1   1 -15   -0.03    0.40
   1   0  15   42.47    2.48
  -1   0 -16   24.31    2.81
  -1   0 -16    7.75    1.62
   1   1 -16    0.15    0.49
  -1   0 -17   80.35    4.36
  -1   0 -17   25.10    2.92
   1   1 -17   -0.84    0.57
  -1   0 -18   11.45    2.35
  -1   0 -18    3.43    1.62
   1   1 -18   10.41    2.36
  -1   0 -19    5.36    2.12
   1   1 -19    7.29    2.23
  -1   0 -20    0.83    1.82
   1   1 -20    0.71    1.74
  -1   0 -21    9.08    2.44
   1   1 -21    5.52    2.20
  -1   0 -22    5.30    2.20
   1   1 -22    6.57    2.28
  -1   0 -23    1.52    1.99
   1   1 -23    1.45    1.90
  -1   0 -24   16.31    3.06
   1   1 -24   16.58    3.07
  -1   0 -25   28.67    3.87
   1   1 -25   32.72    4.06
  -1   0 -26    8.99    2.75
   1   1 -26    5.94    2.60
  -1   0 -27   41.13    4.54
   1   1 -27   44.50    4.65
  -1   0 -28   26.67    4.13
   1   1 -28   35.18    4.60
  -1   0 -29   14.36    3.48
   1   1 -29   10.93    3.30
  -1   0 -30   26.35    4.26
   1   1 -30   25.72    4.23
  -3  -2 -30    3.89    2.68
   3   1 -30    2.20    2.78
  -3  -2 -29    4.21    2.74
   3   1 -29    7.09    2.95
  -3  -2 -28   56.95    5.15
   3   1 -28   72.42    5.76
  -3  -2 -27    1.07    2.23
   3   1 -27    4.32    2.54
  -3  -2 -26    2.91    2.34
   3   1 -26    8.97    2.85
  -3  -2 -25    6.57    2.52
   3   1 -25    8.13    2.67
  -3  -2 -24    1.68    2.10
   3   1 -24    3.04    2.19
  -3  -2 -23   51.40    4.37
   3   1 -23   61.89    4.70
  -3  -2 -22    0.15    1.79
   3   1 -22    2.89    2.05
  -3  -2 -21    2.03    1.93
   3   1 -21    1.40    1.80
  -3  -2 -20  133.93    5.72
   3   1 -20  146.52    6.05
  -3  -2 -19    4.63    2.02
   3   1 -19    3.35    2.01
  -3  -2 -18   12.23    2.43
  -3  -2 -18   11.06    2.14
   3   1 -18   23.52    3.17
  -3  -2 -17   60.79    3.96
  -3  -2 -17   34.13    3.22
   3   1 -17   73.36    4.27
  -3  -2 -16   98.39    4.52
  -3  -2 -16   58.48    3.58
   3   1 -16   -0.26    0.44
   3   2  15    1.62    1.40
  -3  -2 -15    0.98    1.40
  -3  -2 -15    1.26    1.33
   3   1 -15   -0.43    0.33
   3   2  14   -0.41    0.86
  -3  -2 -14   24.15    2.71
  -3  -2 -14   14.98    1.88
   3   1 -14   -0.07    0.33
   3   2  13   -0.47    0.56
  -3  -2 -13    2.26    1.32
  -3  -2 -13    1.51    1.14
   3   1 -13   -0.21    0.35
  -3  -2 -12  110.72    3.94
  -3  -2 -12   74.90    3.15
   3   1 -12   39.94    1.57
   3   1 -12   68.88    3.11
   3   2  11  118.95    3.28
  -3  -2 -11   84.44    3.39
  -3  -2 -11    1.39    0.81
   3   1 -11   58.13    1.81
   3   1 -11   98.61    3.57
   3   2  10   98.51    3.10
  -3  -2 -10   59.10    2.78
  -3  -2 -10    6.59    0.99
   3   1 -10   63.99    1.89
   3   1 -10   77.98    3.22
   3   2   9   37.02    2.23
  -3  -2  -9   24.44    2.02
  -3  -2  -9   23.00    1.99
   3   1  -9   30.08    1.52
   3   1  -9   31.52    2.23
   3   2   8    0.47    1.00
  -3  -2  -8    0.83    0.80
  -3  -2  -8    1.09    0.88
   3   1  -8    1.40    0.75
   3   1  -8    0.16    0.58
   3   2   7    3.05    1.10
  -3  -2  -7    1.37    0.81
  -3  -2  -7    1.74    0.86
   3   1  -7    2.36    0.81
   3   1  -7   -0.29    0.31
   3   2   6    1.19    1.01
  -3  -2  -6    0.33    0.68
  -3  -2  -6    1.18    0.82
   3   1  -6    0.23    0.79
   3   1  -6   -0.02    0.30
   3   2   5  269.55    4.17
  -3  -2  -5  130.33    2.90
  -3  -2  -5  208.86    3.58
   3   1  -5  262.48    3.50
   3   1  -5    0.25    0.33
   3   2   4   25.82    2.07
  -3  -2  -4   10.12    1.07
  -3  -2  -4   19.64    1.86
   3   1  -4   21.42    1.75
   3   1  -4   17.82    1.55
   3   2   3   14.87    1.51
  -3  -2  -3    5.29    0.85
  -3  -2  -3   11.40    1.23
   3   1  -3   15.81    1.43
   3   1  -3   13.13    1.31
   3   2   2  194.20    3.31
  -3  -2  -2  185.75    3.31
   3   1  -2  211.69    3.44
   3   2   1   -0.03    0.19
   3   1  -1   38.73    2.11
   3   2   0  106.81    2.76
   3   1   0  111.84    2.82
   3   2  -1    2.02    1.07
   3   1   1    1.82    0.99
   3   2  -2   99.94    2.72
   3   2  -2   77.36    2.28
   3   1   2   -0.11    0.16
  -3  -1  -3   19.68    1.49
   3   2  -3   55.48    2.30
   3   2  -3   50.81    2.14
   3   1   3   64.21    2.55
  -3  -1  -4    4.12    0.87
  -3  -1  -4    9.31    1.07
   3   2  -4   11.57    1.28
   3   2  -4   10.54    1.18
   3   1   4    9.65    1.35
  -3  -1  -5   13.91    1.50
  -3  -1  -5   24.11    1.74
   3   2  -5   25.04    1.79
   3   2  -5   24.71    1.87
   3   1   5   25.33    2.02
  -3  -1  -6   54.10    2.23
  -3  -1  -6   78.00    2.32
   3   2  -6   92.04    2.42
   3   2  -6   26.86    1.62
   3   1   6  103.62    2.96
  -3  -1  -7    4.17    1.01
  -3  -1  -7    5.30    0.96
   3   2  -7    6.29    1.03
   3   2  -7   -0.21    0.51
   3   1   7    7.34    1.30
  -3  -1  -8    9.36    1.33
  -3  -1  -8   10.76    1.19
   3   2  -8   13.01    1.44
   3   2  -8   14.84    1.68
   3   1   8   14.13    1.56
  -3  -1  -9    0.12    0.84
  -3  -1  -9    1.08    0.83
   3   2  -9   -0.17    0.73
   3   2  -9    0.47    0.94
   3   1   9    0.52    0.99
  -3  -1 -10    1.78    1.02
  -3  -1 -10    1.65    0.91
   3   2 -10    1.26    0.78
   3   2 -10    2.06    1.11
   3   1  10    1.10    0.76
  -3  -1 -11   40.00    2.62
  -3  -1 -11   34.25    2.20
   3   2 -11   26.21    1.63
   3   2 -11   50.99    2.95
   3   1  11   -0.50    0.55
  -3  -1 -12   55.64    3.09
  -3  -1 -12   -0.39    0.45
   3   2 -12   21.03    1.52
   3   2 -12   68.33    3.47
  -3  -1 -13  164.19    4.94
  -3  -1 -13   78.61    3.05
   3   2 -13   41.75    1.88
   3   2 -13  203.51    5.51
   3   1  13  243.06    4.84
  -3  -1 -14  463.97    8.20
  -3  -1 -14  319.32    5.61
   3   2 -14  560.13    9.10
   3   1  14  693.06    7.93
  -3  -1 -15   59.01    3.70
  -3  -1 -15   42.25    2.96
   3   2 -15    0.49    0.66
   3   1  15   90.30    3.63
  -3  -1 -16   49.66    3.60
  -3  -1 -16   35.99    3.03
   3   2 -16    9.98    1.80
   3   1  16   81.63    3.60
  -3  -1 -17    2.75    1.77
  -3  -1 -17    1.63    1.41
   3   2 -17    4.86    1.93
  -3  -1 -18   74.44    4.41
   3   2 -18   90.66    4.91
  -3  -1 -19   -0.30    1.69
   3   2 -19    1.33    1.77
  -3  -1 -20   -0.64    1.64
   3   2 -20    0.20    1.66
  -3  -1 -21    0.39    1.74
   3   2 -21   -0.20    1.72
  -3  -1 -22    2.87    2.05
   3   2 -22    1.79    1.97
  -3  -1 -23   -0.37    1.86
   3   2 -23    2.76    2.13
  -3  -1 -24    4.70    2.36
   3   2 -24    5.50    2.46
  -3  -1 -25   82.26    5.42
   3   2 -25   91.72    5.79
  -3  -1 -26    2.65    2.33
   3   2 -26    0.74    2.11
  -3  -1 -27  111.06    6.41
   3   2 -27  135.82    7.07
  -3  -1 -28    0.44    2.27
   3   2 -28    2.16    2.44
  -3  -1 -29    5.70    2.80
   3   2 -29    4.61    2.92
  -3  -1 -30   60.81    5.60
  -5  -3 -29   13.69    3.41
   5   2 -29   16.44    3.81
  -5  -3 -28    4.11    2.57
   5   2 -28    9.90    3.23
  -5  -3 -27    1.33    2.17
   5   2 -27   -0.46    2.23
  -5  -3 -26    1.14    2.07
   5   2 -26    3.27    2.47
  -5  -3 -25    4.49    2.40
   5   2 -25   10.99    3.01
  -5  -3 -24   -1.47    1.69
   5   2 -24    1.11    2.16
  -5  -3 -23    6.76    2.46
   5   2 -23   12.92    3.09
   5   2 -22  155.71    6.85
  -5  -3 -21    0.04    1.72
   5   2 -21   -0.66    1.87
  -5  -3 -20   22.27    3.15
   5   2 -20   32.18    3.88
  -5  -3 -19   11.39    2.40
   5   2 -19   12.65    2.71
  -5  -3 -18   12.03    2.43
   5   2 -18   20.45    3.09
  -5  -3 -17   42.15    3.63
  -5  -3 -17   58.69    3.82
   5   2 -17   66.57    4.51
   5   3  16    5.06    2.07
  -5  -3 -16   -0.53    1.50
  -5  -3 -16    2.72    1.70
   5   2 -16    2.26    1.88
   5   3  15    4.32    1.98
  -5  -3 -15    1.96    1.58
  -5  -3 -15    1.36    1.57
   5   2 -15    1.58    1.83
   5   3  14    6.86    2.09
  -5  -3 -14    2.41    1.51
  -5  -3 -14    4.75    1.67
   5   2 -14    6.45    2.03
   5   3  13    9.79    2.10
  -5  -3 -13    5.30    1.63
  -5  -3 -13    6.72    1.73
   5   2 -13    8.71    2.07
   5   3  12  116.40    4.28
  -5  -3 -12   61.38    3.33
  -5  -3 -12   92.92    3.78
   5   2 -12  100.11    3.01
   5   2 -12  101.93    4.39
   5   3  11   29.04    2.88
  -5  -3 -11   13.90    1.86
  -5  -3 -11   18.84    1.98
   5   2 -11   24.90    2.05
   5   2 -11   25.22    2.75
   5   3  10   19.97    2.27
  -5  -3 -10   10.65    1.61
  -5  -3 -10   20.92    2.42
   5   2 -10   19.58    1.99
   5   2 -10   19.00    2.22
   5   3   9    0.13    1.37
  -5  -3  -9    0.58    0.93
  -5  -3  -9   -0.05    1.06
   5   2  -9    0.59    1.03
   5   2  -9    0.21    1.12
   5   3   8    8.02    1.70
  -5  -3  -8    4.10    1.12
  -5  -3  -8    5.55    1.35
   5   2  -8    8.17    1.41
   5   2  -8    6.60    1.50
   5   3   7   25.72    2.61
  -5  -3  -7   11.28    1.48
  -5  -3  -7   17.25    2.08
   5   2  -7   24.17    2.20
   5   2  -7   22.00    2.31
   5   3   6   25.07    2.54
  -5  -3  -6    7.45    1.22
  -5  -3  -6    0.09    0.68
   5   2  -6   27.88    2.27
   5   2  -6   20.62    2.13
   5   3   5   87.79    3.41
  -5  -3  -5   19.95    1.67
  -5  -3  -5   -0.70    0.45
   5   2  -5   91.85    3.13
   5   2  -5   73.40    2.99
   5   3   4   30.94    2.51
   5   2  -4   30.85    2.34
   5   2  -4   23.36    2.06
   5   3   3    5.45    1.24
   5   2  -3   12.71    1.68
   5   2  -3    5.37    1.17
   5   3   2   -0.26    0.31
   5   2  -2   60.05    2.84
   5   3   1   73.79    3.00
   5   2  -1   80.21    3.11
   5   3   0   43.76    2.61
   5   2   0   39.77    2.62
   5   3  -1  213.80    4.50
   5   2   1  204.93    4.44
   5   3  -2  248.63    4.77
   5   2   2   -0.20    0.29
   5   3  -3    1.21    1.27
   5   3  -3    0.02    0.48
   5   2   3    0.18    0.56
   5   3  -4   15.75    1.76
   5   3  -4    6.12    1.15
   5   2   4   14.09    1.81
  -5  -2  -5   34.22    2.06
   5   3  -5  143.80    3.73
   5   3  -5  114.62    3.47
   5   2   5  135.48    3.99
  -5  -2  -6    2.63    0.97
  -5  -2  -6    8.41    1.24
   5   3  -6    9.19    1.50
   5   3  -6    8.77    1.46
   5   2   6    9.83    1.77
  -5  -2  -7   87.00    3.14
  -5  -2  -7   89.76    2.81
   5   3  -7  226.14    4.44
   5   3  -7  193.06    4.70
   5   2   7  222.16    5.02
  -5  -2  -8   14.98    1.78
  -5  -2  -8   -0.08    0.46
   5   3  -8   30.51    2.30
   5   3  -8   25.71    2.53
   5   2   8   32.74    2.77
  -5  -2  -9   59.48    2.93
  -5  -2  -9   -0.77    0.51
   5   3  -9  124.13    3.46
   5   3  -9  110.30    3.99
   5   2   9  131.04    4.24
  -5  -2 -10    2.48    1.19
  -5  -2 -10    3.40    1.19
   5   3 -10    5.94    1.33
   5   3 -10    5.14    1.50
   5   2  10    4.52    1.65
  -5  -2 -11   60.47    3.21
  -5  -2 -11   99.06    3.53
   5   3 -11   96.98    3.15
   5   3 -11  104.44    4.21
   5   2  11  109.81    4.07
  -5  -2 -12  307.51    6.61
  -5  -2 -12  481.13    6.83
   5   3 -12  459.44    6.05
   5   3 -12  489.83    8.49
   5   2  12  569.60    8.23
  -5  -2 -13   48.47    3.30
  -5  -2 -13   70.21    3.44
   5   3 -13   66.41    2.73
   5   3 -13   77.04    4.13
   5   2  13   89.20    4.13
  -5  -2 -14   24.41    2.85
  -5  -2 -14   34.38    2.96
   5   3 -14   45.86    3.75
   5   2  14   49.23    3.66
  -5  -2 -15    8.46    2.05
  -5  -2 -15   12.66    2.00
   5   3 -15   20.19    2.89
   5   2  15   18.65    2.61
  -5  -2 -16    7.76    2.08
   5   3 -16    9.58    2.41
   5   2  16   13.26    2.49
  -5  -2 -17   57.79    4.01
   5   3 -17   85.03    4.92
   5   2  17  101.38    4.61
  -5  -2 -18   11.06    2.39
   5   3 -18   21.03    3.19
  -5  -2 -19   18.12    2.85
   5   3 -19   27.68    3.55
  -5  -2 -20   38.44    3.71
   5   3 -20   44.82    4.21
  -5  -2 -21   16.90    2.98
   5   3 -21   22.23    3.40
  -5  -2 -22   33.87    3.84
   5   3 -22   43.09    4.35
  -5  -2 -23   -0.35    1.83
   5   3 -23   -1.48    1.97
  -5  -2 -24   25.24    3.75
   5   3 -24   41.81    4.53
  -5  -2 -25    3.88    2.30
   5   3 -25    5.23    2.59
  -5  -2 -26    4.65    2.58
   5   3 -26    7.69    2.92
  -5  -2 -27    1.20    2.33
   5   3 -27   -0.09    2.33
  -5  -2 -28   52.55    5.15
   5   3 -28   66.72    5.76
  -5  -2 -29   -0.51    2.35
   5   3 -29    0.94    2.60
  -7  -4 -27    3.74    2.47
   7   3 -27    3.79    2.99
  -7  -4 -26   10.94    3.04
   7   3 -26   14.39    3.56
  -7  -4 -25    2.80    2.28
   7   3 -25    4.02    2.76
  -7  -4 -24    2.89    2.15
   7   3 -24    5.08    2.82
  -7  -4 -23    8.05    2.45
   7   3 -23   12.24    3.18
  -7  -4 -22    0.17    1.71
   7   3 -22   -1.77    2.04
  -7  -4 -21    1.23    1.72
   7   3 -21    1.51    2.29
  -7  -4 -20   54.50    4.15
   7   3 -20   97.96    5.72
  -7  -4 -19    2.73    1.81
   7   3 -19    3.54    2.33
  -7  -4 -18   11.09    2.36
   7   3 -18   23.81    3.50
   7   4  17    9.49    2.57
  -7  -4 -17    3.70    1.78
   7   3 -17    8.71    2.50
   7   4  16   77.11    4.52
  -7  -4 -16   26.85    3.03
   7   3 -16   57.03    4.52
   7   4  15   54.05    4.17
  -7  -4 -15   22.38    2.82
  -7  -4 -15   46.63    3.83
   7   3 -15   51.92    4.38
   7   4  14   22.59    3.11
  -7  -4 -14    9.22    2.06
  -7  -4 -14   21.72    2.65
   7   3 -14   18.42    2.89
   7   4  13    3.26    2.26
  -7  -4 -13    1.88    1.51
  -7  -4 -13    3.83    1.88
   7   3 -13    3.93    2.00
   7   4  12   42.44    3.82
  -7  -4 -12   16.02    2.36
  -7  -4 -12   42.17    3.54
   7   3 -12   38.73    2.90
   7   3 -12   36.63    3.57
   7   4  11  112.59    4.85
  -7  -4 -11   36.09    2.88
  -7  -4 -11  109.23    4.42
   7   3 -11  115.10    4.03
   7   3 -11  102.35    4.72
   7   4  10   39.57    3.64
  -7  -4 -10   11.87    1.99
  -7  -4 -10   39.65    3.34
   7   3 -10   38.12    2.97
   7   3 -10   37.54    3.44
   7   4   9   42.88    3.62
  -7  -4  -9   10.06    1.71
  -7  -4  -9   33.53    3.17
   7   3  -9   39.96    2.96
   7   3  -9   36.76    3.37
   7   4   8    8.19    2.15
   7   3  -8   13.51    2.03
   7   3  -8    8.38    1.88
   7   4   7    2.75    1.84
   7   3  -7   -0.14    1.43
   7   3  -7   -0.37    1.26
   7   4   6   21.40    2.59
   7   3  -6   22.63    2.42
   7   3  -6   21.30    2.61
   7   4   5  138.56    4.78
   7   3  -5  136.62    4.47
   7   3  -5  108.43    4.11
   7   4   4   53.94    3.51
   7   3  -4   50.78    3.28
   7   3  -4   35.50    2.78
   7   4   3  347.21    6.71
   7   3  -3  367.41    6.69
   7   4   2    1.05    0.90
   7   3  -2   21.06    2.39
   7   4   1    3.63    1.67
   7   3  -1    6.98    1.79
   7   4   0  185.69    5.17
   7   3   0  182.98    5.11
   7   4  -1  204.50    5.27
   7   3   1  208.61    5.36
   7   4  -2   10.50    2.01
   7   3   2   10.66    1.98
   7   4  -3    0.54    1.51
   7   4  -3    0.15    1.10
   7   3   3   -0.16    0.45
   7   4  -4  145.86    4.62
   7   4  -4  112.37    3.99
   7   3   4  148.23    4.83
   7   4  -5   69.62    3.54
   7   4  -5   52.87    3.18
   7   3   5   70.58    3.77
   7   4  -6   89.41    3.76
   7   4  -6   76.50    3.55
   7   3   6   95.94    4.33
   7   4  -7    0.54    1.47
   7   4  -7    1.19    1.31
   7   3   7    1.32    1.78
   7   4  -8    0.74    1.47
   7   4  -8    1.42    1.43
   7   3   8    2.11    1.91
  -7  -3  -9    0.61    1.19
   7   4  -9    5.35    1.68
   7   4  -9    3.60    1.67
   7   3   9    4.30    2.09
  -7  -3 -10   -0.21    1.14
   7   4 -10    2.62    1.57
   7   4 -10    1.28    1.61
   7   3  10    0.34    1.89
  -7  -3 -11   16.71    2.28
  -7  -3 -11   49.10    3.45
   7   4 -11   43.60    3.08
   7   4 -11   44.04    3.71
   7   3  11   41.97    3.81
  -7  -3 -12    9.96    1.99
  -7  -3 -12   31.89    3.21
   7   4 -12   31.79    2.87
   7   4 -12   29.02    3.35
   7   3  12   29.48    3.56
  -7  -3 -13    5.50    1.87
  -7  -3 -13   13.22    2.16
   7   4 -13   13.39    2.56
   7   3  13   15.14    2.78
  -7  -3 -14  100.80    4.66
   7   4 -14  215.38    6.89
   7   3  14  243.63    6.78
  -7  -3 -15   45.44    3.57
   7   4 -15   99.91    5.19
   7   3  15  114.01    5.27
  -7  -3 -16   20.28    2.82
   7   4 -16   50.00    4.18
   7   3  16   53.13    4.24
  -7  -3 -17   70.53    4.32
   7   4 -17  142.68    6.13
   7   3  17  161.65    5.92
  -7  -3 -18   12.12    2.51
   7   4 -18   25.54    3.54
  -7  -3 -19    0.05    1.60
   7   4 -19    0.35    2.02
  -7  -3 -20    3.05    2.01
   7   4 -20    9.31    2.89
  -7  -3 -21    3.56    2.05
   7   4 -21    8.51    2.81
  -7  -3 -22   26.96    3.72
   7   4 -22   52.81    4.90
  -7  -3 -23    3.06    2.16
   7   4 -23    0.58    2.28
  -7  -3 -24   40.30    4.24
   7   4 -24   74.05    5.61
  -7  -3 -25   10.41    2.86
   7   4 -25   25.44    4.12
  -7  -3 -26    1.96    2.22
   7   4 -26   -1.72    2.37
   7   4 -27   63.24    5.78
  -9  -5 -25    0.88    2.10
   9   4 -25    4.85    3.06
  -9  -5 -24    3.11    2.14
   9   4 -24    4.21    3.01
  -9  -5 -23    0.22    1.86
   9   4 -23    1.34    2.64
  -9  -5 -22   29.76    3.68
   9   4 -22   89.50    6.12
  -9  -5 -21   13.09    2.78
   9   4 -21   27.28    4.15
  -9  -5 -20    0.34    1.63
   9   4 -20   -0.49    2.24
  -9  -5 -19   17.75    3.07
   9   4 -19   46.62    4.77
  -9  -5 -18   19.92    3.02
   9   4 -18   53.80    4.86
   9   5  17   14.75    3.16
  -9  -5 -17    3.44    1.80
   9   4 -17   11.46    2.99
   9   5  16    1.84    2.50
  -9  -5 -16    0.86    1.50
   9   4 -16   -1.09    2.00
   9   5  15    3.90    2.46
  -9  -5 -15    2.31    1.59
   9   4 -15    3.36    2.21
   9   5  14    5.26    2.57
  -9  -5 -14    2.06    1.49
   9   4 -14    7.12    2.39
   9   5  13    2.94    2.41
  -9  -5 -13    1.48    1.42
   9   4 -13    3.14    2.11
   9   5  12   50.31    4.30
   9   4 -12   45.06    4.05
   9   5  11    8.57    2.75
   9   4 -11    9.08    2.33
   9   4 -11   10.37    2.56
   9   5  10   15.83    3.07
   9   4 -10    9.94    2.35
   9   4 -10   12.43    2.60
   9   5   9    1.97    2.38
   9   4  -9    1.70    1.98
   9   4  -9   -0.18    1.81
   9   5   8   -0.36    2.26
   9   4  -8   -0.68    1.87
   9   4  -8    0.07    1.72
   9   5   7   17.48    3.08
   9   4  -7   19.59    2.83
   9   4  -7   17.94    2.65
   9   5   6   43.12    3.99
   9   4  -6   37.51    3.65
   9   4  -6   33.39    3.45
   9   5   5   13.16    2.81
   9   4  -5   17.93    2.75
   9   4  -5   10.27    2.23
   9   5   4    0.38    0.80
   9   4  -4   10.36    2.53
   9   4  -4    6.94    2.00
   9   5   3    0.43    0.68
   9   4  -3    3.46    2.27
   9   5   2    0.19    0.74
   9   4  -2   90.79    4.75
   9   5   1   20.05    2.91
   9   4  -1   25.56    3.15
   9   5   0    5.71    2.39
   9   4   0    6.39    2.36
   9   5  -1   27.20    3.25
   9   4   1   25.33    3.20
   9   5  -2  405.17    8.29
   9   4   2   -0.18    0.77
   9   5  -3   29.61    3.32
   9   5  -3   21.91    2.70
   9   4   3   -0.26    0.62
   9   5  -4  160.22    5.65
   9   5  -4  134.27    4.98
   9   4   4   -0.36    0.62
   9   5  -5   16.78    2.75
   9   5  -5   13.65    2.30
   9   4   5   16.99    2.86
   9   5  -6   31.13    3.52
   9   5  -6   28.80    3.36
   9   4   6   29.98    3.72
   9   5  -7   66.11    4.09
   9   5  -7   55.57    3.99
   9   4   7   63.83    4.52
   9   5  -8   13.99    2.57
   9   5  -8   14.45    2.59
   9   4   8   11.49    2.79
   9   5  -9  163.41    5.49
   9   5  -9  152.97    5.77
   9   4   9  165.18    6.24
   9   5 -10   12.54    2.48
   9   5 -10    7.93    2.34
   9   4  10   10.24    2.86
   9   5 -11  123.27    4.95
   9   5 -11  114.06    5.35
   9   4  11  128.59    5.82
   9   5 -12   96.37    4.44
   9   5 -12   87.31    4.99
   9   4  12   88.96    5.16
  -9  -4 -13   -0.36    1.30
   9   5 -13    0.43    1.87
   9   4  13    0.17    2.30
  -9  -4 -14   -0.52    1.32
   9   5 -14   -0.27    1.88
   9   4  14    0.77    2.31
  -9  -4 -15   -0.20    1.38
   9   5 -15   -0.21    1.89
   9   4  15    1.70    2.39
  -9  -4 -16   11.00    2.43
   9   5 -16   25.06    3.56
   9   4  16   24.02    3.55
  -9  -4 -17    1.43    1.63
   9   5 -17    7.10    2.59
   9   4  17    4.59    2.66
  -9  -4 -18    6.19    2.09
   9   5 -18    9.78    2.91
   9   4  18    8.45    2.91
  -9  -4 -19   12.42    2.76
   9   5 -19   30.82    4.10
  -9  -4 -20   23.12    3.36
   9   5 -20   56.46    5.11
  -9  -4 -21   36.31    3.84
   9   5 -21   83.45    5.84
  -9  -4 -22   57.46    4.67
   9   5 -22  150.23    7.41
  -9  -4 -23   18.93    3.41
   9   5 -23   48.44    5.21
  -9  -4 -24    2.24    2.13
   9   5 -24    1.45    2.73
  -9  -4 -25    5.81    2.69
   9   5 -25   17.45    3.93
 -11  -6 -23    1.93    2.13
  11   5 -23   12.39    3.78
 -11  -6 -22    1.47    2.06
  11   5 -22    1.52    2.88
 -11  -6 -21    1.26    1.98
  11   5 -21    6.60    3.11
 -11  -6 -20    3.23    2.07
  11   5 -20   24.36    4.23
  11   5 -19    4.00    2.84
  11   6  18   36.48    4.47
  11   5 -18   35.57    4.60
  11   6  17    6.07    3.00
  11   5 -17    9.04    3.03
  11   6  16    1.71    2.69
  11   5 -16    2.17    2.46
  11   6  15   44.54    4.53
  11   5 -15   47.61    4.69
  11   6  14   -1.75    2.44
  11   5 -14   -0.16    2.16
  11   6  13    0.03    2.51
  11   5 -13    2.04    2.23
  11   6  12    2.91    2.62
  11   5 -12    4.51    2.44
  11   6  11   -0.64    2.40
  11   5 -11   -1.13    1.95
  11   5 -11    1.50    2.16
  11   6  10   44.53    4.40
  11   5 -10   53.32    4.09
  11   5 -10   45.78    4.22
  11   6   9    5.87    2.72
  11   5  -9    6.60    2.38
  11   5  -9    4.44    2.24
  11   6   8   35.10    4.12
  11   5  -8   29.70    3.49
  11   5  -8   33.68    3.72
  11   6   7   20.86    3.45
  11   5  -7   22.46    3.27
  11   5  -7   16.46    2.88
  11   6   6   21.44    3.46
  11   5  -6   19.69    3.16
  11   5  -6   21.42    3.13
  11   6   5  197.05    7.05
  11   5  -5  194.35    6.71
  11   5  -5  149.04    5.96
  11   6   4    6.77    2.80
  11   5  -4    8.94    2.82
  11   5  -4    8.46    2.42
  11   6   3  508.32   10.50
  11   5  -3  541.74   10.50
  11   5  -3  404.84    8.90
  11   6   2   46.37    4.43
  11   5  -2   49.31    4.40
  11   6   1    8.67    2.89
  11   5  -1    8.40    2.89
  11   6   0    3.56    2.67
  11   5   0    4.22    2.61
  11   6  -1  184.19    6.79
  11   5   1  172.00    6.65
  11   6  -2  101.17    5.48
  11   6  -2   75.02    4.65
  11   5   2   96.19    5.43
  11   6  -3   39.37    4.19
  11   6  -3   31.46    3.71
  11   5   3   34.23    4.17
  11   6  -4  185.80    6.65
  11   6  -4  157.11    5.84
  11   5   4  189.22    6.92
  11   6  -5   42.81    4.13
  11   6  -5   33.95    3.77
  11   5   5   40.01    4.30
  11   6  -6   32.02    3.78
  11   6  -6   28.95    3.42
  11   5   6   31.35    3.97
  11   6  -7   30.58    3.67
  11   6  -7   24.35    3.24
  11   5   7   30.99    3.96
  11   6  -8   11.02    2.62
  11   6  -8   15.40    2.83
  11   5   8   13.37    3.22
  11   6  -9  116.26    5.30
  11   6  -9  100.09    5.29
  11   5   9  116.63    5.92
  11   6 -10   17.79    2.95
  11   6 -10   14.41    2.93
  11   5  10   17.76    3.47
  11   6 -11   13.28    2.69
  11   6 -11   15.95    3.03
  11   5  11   15.02    3.28
  11   6 -12   18.80    3.23
  11   5  12   16.14    3.36
  11   6 -13   87.52    5.34
  11   5  13   93.01    5.64
  11   6 -14    1.64    2.28
  11   5  14    2.32    2.76
  11   6 -15   14.77    3.20
  11   5  15   14.01    3.42
  11   6 -16   -1.28    2.09
  11   5  16    2.40    2.78
  11   6 -17   41.38    4.66
  11   5  17   49.09    4.79
  11   6 -18    0.59    2.43
  11   5  18    1.13    2.75
  11   6 -19    4.63    2.86
 -11  -5 -20    6.51    2.44
  11   6 -20   15.92    3.71
 -11  -5 -21    1.47    1.99
  11   6 -21    3.72    2.98
 -11  -5 -22    4.06    2.31
  11   6 -22    9.25    3.50
 -11  -5 -23    2.87    2.28
  11   6 -23    5.88    3.18
  13   6 -19   53.96    5.80
  13   7  18    3.42    3.24
  13   6 -18    2.64    3.06
  13   7  17    1.99    3.08
  13   6 -17   -0.62    2.69
  13   7  16   10.81    3.56
  13   6 -16   15.78    3.72
  13   7  15   -0.05    2.89
  13   6 -15    0.65    2.64
  13   7  14    2.72    3.04
  13   6 -14    3.15    2.73
  13   7  13   12.93    3.57
  13   6 -13   12.44    3.30
  13   7  12   -0.30    2.69
  13   6 -12   -0.90    2.24
  13   7  11    5.58    3.11
  13   6 -11    5.50    2.71
  13   7  10   -2.96    2.56
  13   6 -10    0.41    2.42
  13   6 -10    1.68    2.39
  13   7   9   -0.57    2.58
  13   6  -9    4.61    2.60
  13   6  -9    2.02    2.30
  13   7   8    2.34    2.84
  13   6  -8    1.82    2.49
  13   6  -8   -0.03    2.25
  13   7   7   36.30    4.52
  13   6  -7   36.09    4.10
  13   6  -7   28.14    3.89
  13   7   6    2.22    2.72
  13   6  -6    0.61    2.52
  13   6  -6   -0.31    2.07
  13   7   5   46.93    4.65
  13   6  -5   51.66    4.65
  13   6  -5   44.58    4.45
  13   7   4    0.67    2.61
  13   6  -4   -0.47    2.50
  13   6  -4   -0.76    2.03
  13   7   3   30.36    4.16
  13   6  -3   35.13    4.35
  13   6  -3   26.52    3.60
  13   7   2    7.28    2.94
  13   6  -2    6.90    2.96
  13   6  -2    9.25    2.66
  13   7   1    8.65    3.12
  13   6  -1   11.77    3.28
  13   7   0    9.89    3.14
  13   6   0   10.71    3.18
  13   7  -1    5.33    2.80
  13   7  -1    4.62    2.32
  13   6   1    4.83    2.89
  13   7  -2    0.18    2.50
  13   7  -2   -0.02    1.94
  13   6   2    1.99    2.68
  13   7  -3   22.20    3.68
  13   7  -3   19.87    3.21
  13   6   3   26.38    3.97
  13   7  -4   21.14    3.64
  13   7  -4   17.09    3.04
  13   6   4   20.52    3.71
  13   7  -5    7.26    2.99
  13   7  -5    6.26    2.48
  13   6   5   11.16    3.20
  13   7  -6   38.42    4.26
  13   7  -6   34.48    4.15
  13   6   6   39.46    4.47
  13   7  -7    8.58    2.83
  13   7  -7    8.60    2.63
  13   6   7    6.26    3.03
  13   7  -8    4.53    2.61
  13   7  -8    1.61    2.26
  13   6   8    5.53    3.06
  13   7  -9   11.84    3.13
  13   7  -9    9.68    2.87
  13   6   9   10.41    3.35
  13   7 -10    4.32    2.59
  13   7 -10    1.58    2.40
  13   6  10    3.32    2.97
  13   7 -11   35.74    4.46
  13   6  11   36.53    4.61
  13   7 -12    0.42    2.30
  13   6  12   -2.73    2.56
  13   7 -13    7.86    3.07
  13   6  13   11.08    3.43
  13   7 -14    3.75    2.66
  13   6  14    2.43    2.97
  13   7 -15    6.18    2.97
  13   6  15    3.98    3.24
  13   7 -16    7.80    3.12
  13   6  16    6.93    3.32
  13   7 -17   45.85    5.27
  13   6  17   35.59    4.92
  13   7 -18    3.95    3.09
  13   6  18    3.56    3.35
  13   7 -19    3.65    3.11
  15   7 -14   -0.43    2.72
  15   7 -13   11.71    3.61
  15   7 -12   -0.88    2.77
  15   7 -11    1.92    2.73
  15   8  10   26.09    4.63
  15   7 -10   28.12    4.36
  15   8   9    7.01    3.42
  15   7  -9    2.94    2.83
  15   7  -9    0.94    2.58
  15   8   8    2.84    3.14
  15   7  -8    1.92    2.77
  15   7  -8   -1.40    2.42
  15   8   7   17.93    3.95
  15   7  -7   20.84    3.84
  15   7  -7   16.53    3.54
  15   8   6   49.54    5.18
  15   7  -6   48.39    4.87
  15   7  -6   45.86    4.83
  15   8   5   49.14    5.14
  15   7  -5   50.11    4.94
  15   7  -5   38.47    4.71
  15   8   4    4.64    3.03
  15   7  -4   12.32    3.46
  15   7  -4    5.23    2.80
  15   8   3  174.12    7.91
  15   7  -3  177.66    7.77
  15   7  -3  147.46    6.96
  15   8   2   93.08    6.22
  15   7  -2  100.00    6.25
  15   7  -2   76.93    5.48
  15   8   1   29.06    4.41
  15   7  -1   27.54    4.38
  15   7  -1   20.92    3.62
  15   8   0   27.52    4.25
  15   8   0   18.55    3.57
  15   7   0   23.14    4.16
  15   8  -1   11.48    3.43
  15   8  -1    9.59    3.04
  15   7   1   15.65    3.75
  15   8  -2  127.86    6.84
  15   8  -2  106.18    6.10
  15   7   2  132.75    7.10
  15   8  -3   24.57    4.12
  15   8  -3   26.14    3.99
  15   7   3   23.16    4.16
  15   8  -4   61.06    5.26
  15   8  -4   52.21    4.92
  15   7   4   58.68    5.38
  15   8  -5    1.14    2.73
  15   8  -5   -2.11    2.23
  15   7   5   -0.64    2.79
  15   8  -6   -0.39    2.69
  15   8  -6    2.11    2.61
  15   7   6    3.71    3.06
  15   8  -7   18.01    3.69
  15   8  -7   11.58    3.22
  15   7   7   15.97    3.95
  15   8  -8   13.74    3.51
  15   8  -8    8.42    3.19
  15   7   8   11.80    3.67
  15   8  -9   43.63    4.81
  15   8  -9   32.51    4.45
  15   7   9   34.52    5.02
  15   8 -10   72.34    5.85
  15   7  10   78.83    6.26
  15   8 -11   17.39    3.86
  15   8 -12   16.03    3.79
  15   8 -13   30.14    4.72
  15   8 -14   47.41    5.45
   0  -1 -30    2.05    2.68
   0  -1 -29    0.21    2.43
   0  -1 -28   12.10    3.22
   0  -1 -27    1.60    2.26
   0  -1 -26    5.65    2.49
   0  -1 -25    0.14    1.98
   0  -1 -24    0.13    1.98
   0  -1 -23    0.93    1.92
   0  -1 -22    1.98    1.90
   0  -1 -21    1.62    1.83
   0  -1 -21    0.73    1.82
   0  -1 -20  130.00    5.72
   0  -1 -20   64.41    4.26
   0  -1 -19    0.09    1.74
   0  -1 -19   -0.18    1.77
   0  -1 -18   18.80    2.78
   0  -1 -17   -0.43    1.48
   0  -1 -16   34.02    3.24
   0  -1 -15    0.06    1.32
   0  -1 -14   33.68    2.82
   0  -1 -13    0.03    1.09
   0  -1 -12   27.74    2.39
   0  -1 -11   -0.14    0.96
   0  -1 -10  259.89    4.99
   0  -1  -9    0.16    0.85
   0  -1  -8  318.02    4.88
   0  -1  -7    0.12    0.79
   0  -1  -6  157.97    3.16
   0  -1  -5   -0.09    0.62
   0  -1  -4   50.62    1.57
   0   1   2   53.79    0.64
   0   1   1    0.08    0.12
   0   1   0    0.06    0.05
   0   1  -1    0.10    0.15
   0   1  -2   41.54    0.96
   0   1  -3    0.33    0.37
   0   1  -4  325.23    2.90
   0   1  -4    0.19    0.16
   0   1  -5   -0.33    0.58
   0   1  -5    0.01    0.09
   0   1  -6   39.42    1.54
   0   1  -6    0.07    0.11
   0   1  -7    0.15    0.64
   0   1  -7    0.10    0.13
   0   1  -8   30.77    1.51
   0   1  -8    0.06    0.14
   0   1  -9    0.14    0.64
   0   1  -9   -0.02    0.17
   0   1 -10    1.04    0.71
   0   1 -10    0.16    0.32
   0   1 -11   -0.12    0.70
   0   1 -11   -0.17    0.58
   0   1 -12   11.90    1.23
   0   1 -12    6.38    1.38
   0   1 -13   -0.25    0.80
   0   1 -13   -0.39    1.00
   0   1 -14  172.20    3.41
   0   1 -14  145.02    4.76
   0   1 -15   -0.24    0.41
   0   1 -16    0.21    0.55
   0   1 -17    0.24    0.88
   0   1 -18   16.97    2.68
   0   1 -19    1.10    1.74
   0   1 -20    3.80    2.01
   0   1 -21   -0.56    1.70
   0   1 -22    6.00    2.25
   0   1 -23    0.61    1.90
   0   1 -24    8.61    2.59
   0   1 -25   -0.69    1.90
   0   1 -26   21.55    3.67
   0   1 -27    1.15    2.14
   0   1 -28  132.11    7.13
   0   1 -29    2.05    2.56
   0   1 -30   29.16    4.41
  -2  -2 -30    2.84    2.67
   2   0 -30    6.53    3.01
  -2  -2 -29   15.75    3.48
   2   0 -29   13.42    3.46
  -2  -2 -28   16.31    3.51
   2   0 -28   16.32    3.61
  -2  -2 -27   18.44    3.48
   2   0 -27   13.22    3.21
  -2  -2 -26   28.28    3.88
   2   0 -26   35.37    4.31
  -2  -2 -25   10.38    2.82
   2   0 -25   13.23    3.00
  -2  -2 -24   92.07    5.50
   2   0 -24  101.76    5.81
  -2  -2 -23    6.23    2.34
   2   0 -23    4.22    2.31
  -2  -2 -22   84.49    5.00
   2   0 -22   88.69    5.18
  -2  -2 -21   42.72    3.86
   2   0 -21   53.73    4.29
  -2  -2 -20   38.08    3.80
  -2  -2 -20   12.20    2.42
   2   0 -20   43.29    3.98
  -2  -2 -19    0.00    1.70
  -2  -2 -19   -0.18    1.68
   2   0 -19    0.83    1.82
  -2  -2 -18   17.45    2.61
  -2  -2 -18    4.55    1.88
   2   0 -18   20.71    2.95
  -2  -2 -17    4.02    1.82
  -2  -2 -17    1.04    1.58
   2   0 -17    3.50    1.86
  -2  -2 -16   39.64    3.29
  -2  -2 -16    8.29    1.80
   2   0 -16   -0.85    1.06
  -2  -2 -15    5.90    1.72
  -2  -2 -15    2.74    1.37
   2   0 -15    0.04    0.99
   2   2  14    4.98    1.31
  -2  -2 -14    5.93    1.60
  -2  -2 -14    0.57    1.12
   2   0 -14    3.20    1.49
   2   2  13    2.94    1.17
  -2  -2 -13    2.33    1.24
  -2  -2 -13    0.44    1.05
   2   0 -13    3.97    1.47
   2   2  12   31.37    2.12
  -2  -2 -12   21.89    2.26
  -2  -2 -12    4.17    1.21
   2   0 -12   24.69    2.49
   2   2  11    0.13    0.97
  -2  -2 -11    0.07    0.92
  -2  -2 -11   -0.11    0.83
   2   0 -11    0.17    1.04
   2   2  10  164.31    3.24
  -2  -2 -10  111.57    3.48
  -2  -2 -10    1.47    0.63
   2   0 -10  131.67    3.90
   2   2   9  188.66    3.33
  -2  -2  -9  121.62    3.38
  -2  -2  -9   43.88    2.27
   2   0  -9  151.37    3.94
   2   2   8  338.21    4.14
  -2  -2  -8  225.62    4.21
  -2  -2  -8   86.51    2.78
   2   0  -8  264.32    4.76
   2   2   7   21.36    1.76
  -2  -2  -7   13.03    1.51
  -2  -2  -7    8.36    1.12
   2   0  -7   16.50    1.08
   2   0  -7   12.40    1.38
   2   2   6  809.11    5.92
  -2  -2  -6  515.93    5.37
  -2  -2  -6  326.85    4.34
   2   0  -6  727.26    4.10
   2   2   5   89.59    2.44
  -2  -2  -5   55.25    2.00
  -2  -2  -5   47.08    2.22
   2   0  -5   85.46    1.83
   2   0  -5    0.04    0.41
   2   2   4  177.05    2.97
  -2  -2  -4  101.48    2.22
  -2  -2  -4  108.46    2.67
   2   0  -4  173.86    2.39
   2   0  -4   -0.01    0.20
   2   2   3   -0.48    0.78
  -2  -2  -3    0.09    0.66
   2   0  -3    0.29    0.65
   2   0  -3    0.02    0.11
   2   2   2   47.03    1.73
  -2  -2  -2   36.31    1.60
   2   0  -2   47.80    1.52
   2   0  -2    0.02    0.07
   2   2   1    1.01    0.36
  -2  -2  -1   23.58    1.13
   2   0  -1   27.64    1.33
   2   2   0   62.50    1.65
   2   0   0   68.29    1.75
   2   2  -1    0.09    0.63
   2   0   1    0.26    0.53
  -2   0  -2  240.54    3.08
   2   2  -2  684.46    4.89
  -2   0  -3    3.13    0.69
   2   2  -3    7.25    0.96
   2   2  -3    7.48    0.89
   2   0   3    6.90    1.03
  -2   0  -4  109.18    2.55
   2   2  -4  176.17    2.81
   2   2  -4  170.60    3.04
   2   0   4  185.21    3.23
  -2   0  -5   24.96    1.68
   2   2  -5   31.64    1.65
   2   2  -5   34.97    1.92
   2   0   5   37.93    2.07
  -2   0  -6   62.15    2.33
   2   2  -6   67.03    1.97
   2   2  -6   79.72    2.57
   2   0   6   88.09    2.62
  -2   0  -7    6.06    1.13
  -2   0  -7    5.51    0.83
   2   2  -7    6.22    0.92
   2   2  -7   -0.10    0.38
   2   0   7    9.93    1.28
  -2   0  -8    2.11    0.87
  -2   0  -8    2.04    0.72
   2   2  -8    1.83    0.74
   2   2  -8   -0.38    0.36
   2   0   8    4.77    1.10
  -2   0  -9   13.79    1.61
  -2   0  -9    5.79    0.92
   2   2  -9    4.38    0.83
   2   2  -9   14.99    1.85
   2   0   9   14.52    1.80
  -2   0 -10   21.49    2.14
  -2   0 -10   10.08    1.17
   2   2 -10    4.89    0.88
   2   2 -10   25.26    2.21
   2   0  10   28.74    2.08
  -2   0 -11   17.17    2.08
  -2   0 -11    7.00    1.13
   2   2 -11    6.58    0.97
   2   2 -11   19.95    2.23
   2   0  11   24.02    2.09
  -2   0 -12    0.66    1.10
  -2   0 -12    0.16    0.83
   2   2 -12    0.46    0.71
   2   2 -12    1.44    1.16
   2   0  12    0.54    1.10
  -2   0 -13   63.12    3.40
  -2   0 -13    1.31    0.60
   2   2 -13   49.98    2.00
   2   2 -13   70.69    3.51
   2   0  13   33.34    1.99
  -2   0 -14   -0.53    1.19
  -2   0 -14   -0.02    0.90
   2   2 -14    0.02    0.79
   2   2 -14    0.83    1.29
   2   0  14   -0.18    0.57
  -2   0 -15    0.04    1.36
  -2   0 -15    0.38    1.11
   2   2 -15   -0.13    0.46
   2   0  15   -0.69    0.99
  -2   0 -16   96.82    4.54
  -2   0 -16   28.51    2.76
   2   2 -16   -0.19    0.47
   2   0  16  138.93    4.00
  -2   0 -17    0.22    1.56
  -2   0 -17    1.54    1.36
   2   2 -17    1.14    1.38
  -2   0 -18    3.99    1.93
   2   2 -18    5.40    2.08
  -2   0 -19    1.74    1.78
   2   2 -19    1.37    1.81
  -2   0 -20    1.80    1.83
   2   2 -20    0.93    1.73
  -2   0 -21    2.68    1.94
   2   2 -21    3.88    2.04
  -2   0 -22   10.27    2.52
   2   2 -22    7.74    2.33
  -2   0 -23    2.52    2.09
   2   2 -23    3.37    2.10
  -2   0 -24   37.59    4.05
   2   2 -24   41.95    4.27
  -2   0 -25   14.41    3.01
   2   2 -25   16.79    3.19
   2   2 -26  253.85    8.96
  -2   0 -27    7.08    2.76
   2   2 -27    7.03    2.76
  -2   0 -28   37.24    4.56
   2   2 -28   40.87    4.77
  -2   0 -29   11.39    3.29
   2   2 -29   11.64    3.28
  -2   0 -30   27.49    4.31
   2   2 -30   31.34    4.72
  -4  -3 -29    9.21    3.09
   4   1 -29    8.76    3.22
  -4  -3 -28    3.29    2.61
   4   1 -28    6.64    3.01
  -4  -3 -27   -0.91    2.14
   4   1 -27   -2.12    2.10
  -4  -3 -26    3.61    2.45
   4   1 -26    7.38    2.81
  -4  -3 -25    0.07    1.94
   4   1 -25    0.12    2.03
  -4  -3 -24   -1.75    1.76
   4   1 -24    1.17    2.15
  -4  -3 -23    4.17    2.14
   4   1 -23    2.66    2.16
  -4  -3 -22   10.48    2.61
   4   1 -22   12.64    2.75
  -4  -3 -21    1.34    1.82
   4   1 -21    0.45    1.77
  -4  -3 -20    7.85    2.25
   4   1 -20   15.28    2.82
  -4  -3 -19  116.10    5.28
   4   1 -19  160.73    6.29
  -4  -3 -18   -2.47    1.53
  -4  -3 -18    0.50    1.68
   4   1 -18    0.57    1.80
  -4  -3 -17   15.42    2.49
  -4  -3 -17   13.65    2.27
   4   1 -17   23.70    2.99
  -4  -3 -16   12.95    2.30
  -4  -3 -16   10.40    2.04
   4   1 -16    6.18    1.73
   4   3  15   91.07    3.84
  -4  -3 -15   56.13    3.59
  -4  -3 -15   50.05    3.48
   4   1 -15   -0.07    0.53
   4   3  14  139.02    4.32
  -4  -3 -14   82.43    3.94
  -4  -3 -14   75.58    3.70
   4   1 -14   -0.29    0.41
   4   3  13   44.82    3.06
  -4  -3 -13   26.37    2.66
  -4  -3 -13   28.68    2.77
   4   1 -13    7.33    1.35
   4   3  12   71.12    3.30
  -4  -3 -12   39.98    2.80
  -4  -3 -12   43.20    2.88
   4   1 -12   52.06    2.00
   4   1 -12   62.80    3.45
   4   3  11   16.75    1.95
  -4  -3 -11    9.26    1.56
  -4  -3 -11   12.58    1.70
   4   1 -11   13.38    1.51
   4   1 -11   13.08    1.93
   4   3  10  305.50    5.34
  -4  -3 -10  179.09    4.42
  -4  -3 -10  206.36    4.57
   4   1 -10  285.09    3.95
   4   1 -10  262.63    5.72
   4   3   9    5.80    1.36
  -4  -3  -9    6.55    1.27
  -4  -3  -9    7.20    1.36
   4   1  -9   13.67    1.35
   4   1  -9   15.38    1.91
   4   3   8    0.60    0.76
  -4  -3  -8  178.83    4.02
  -4  -3  -8   -0.37    0.48
   4   1  -8  339.27    4.37
   4   1  -8  287.56    5.58
   4   3   7    0.24    0.60
  -4  -3  -7    1.23    0.79
  -4  -3  -7    0.23    0.58
   4   1  -7    1.06    0.91
   4   1  -7    1.84    1.01
  -4  -3  -6   31.20    1.84
  -4  -3  -6   60.05    2.54
   4   1  -6   75.49    2.50
   4   1  -6   51.82    2.41
   4   3   5    1.52    0.89
  -4  -3  -5    1.36    0.70
  -4  -3  -5    1.67    0.97
   4   1  -5    1.59    1.03
   4   1  -5   -0.12    0.38
   4   3   4    2.94    0.97
  -4  -3  -4    1.21    0.70
  -4  -3  -4    4.36    1.06
   4   1  -4    4.83    1.19
   4   1  -4   -0.04    0.40
   4   3   3    1.28    0.64
  -4  -3  -3   63.49    2.58
   4   1  -3   75.38    2.61
   4   1  -3   -0.04    0.40
   4   3   2   -0.08    0.30
   4   1  -2  157.90    3.49
   4   3   1    0.11    0.26
   4   1  -1    6.24    1.34
   4   3   0   47.09    2.58
   4   1   0   49.87    2.54
   4   3  -1   27.69    2.20
   4   1   1   33.99    2.37
   4   3  -2    2.02    1.14
   4   3  -2    1.43    0.81
   4   1   2   -0.15    0.21
   4   3  -3   22.13    2.02
   4   3  -3   20.44    1.74
   4   1   3   -0.08    0.35
  -4  -1  -4   11.37    1.41
   4   3  -4   36.31    2.24
   4   3  -4   29.23    1.88
   4   1   4   -0.06    0.55
  -4  -1  -5   34.04    1.96
   4   3  -5   90.36    2.86
   4   3  -5   59.99    2.35
   4   1   5   -0.42    0.58
  -4  -1  -6    1.83    0.85
  -4  -1  -6    3.00    0.91
   4   3  -6    3.15    1.08
   4   3  -6    0.71    0.69
   4   1   6   -0.06    0.89
  -4  -1  -7    2.28    0.94
  -4  -1  -7    4.67    0.99
   4   3  -7    4.76    1.15
   4   3  -7    6.67    1.28
   4   1   7    6.67    1.42
  -4  -1  -8    0.72    0.87
  -4  -1  -8    2.37    0.94
   4   3  -8    3.52    1.06
   4   3  -8    3.30    1.16
   4   1   8    3.03    1.36
  -4  -1  -9    7.01    1.35
  -4  -1  -9    9.91    1.29
   4   3  -9   13.17    1.48
   4   3  -9   11.31    1.70
   4   1   9   11.53    1.75
  -4  -1 -10    9.71    1.55
  -4  -1 -10   10.92    1.36
   4   3 -10   12.50    1.43
   4   3 -10   14.62    2.00
   4   1  10   13.31    1.87
  -4  -1 -11   25.83    2.47
  -4  -1 -11   36.68    2.19
   4   3 -11   29.22    1.98
   4   3 -11   38.20    2.93
   4   1  11   40.83    2.86
  -4  -1 -12   16.68    2.09
  -4  -1 -12   -0.59    0.42
   4   3 -12   16.70    1.76
   4   3 -12   21.93    2.71
   4   1  12   26.22    2.72
  -4  -1 -13    4.22    1.56
  -4  -1 -13    1.75    1.05
   4   3 -13    3.33    1.08
   4   3 -13    8.30    1.94
   4   1  13    6.32    1.79
  -4  -1 -14   10.69    2.04
  -4  -1 -14   14.01    1.77
   4   3 -14   16.66    2.44
   4   1  14   20.10    2.37
  -4  -1 -15  127.12    4.96
  -4  -1 -15  142.59    4.24
   4   3 -15  179.17    5.88
   4   1  15  212.80    5.39
  -4  -1 -16   53.11    3.73
   4   3 -16   73.67    4.35
   4   1  16   83.10    3.98
  -4  -1 -17   65.36    4.19
   4   3 -17   88.49    4.80
   4   1  17  105.34    4.38
  -4  -1 -18    0.88    1.75
   4   3 -18    0.44    1.81
  -4  -1 -19   75.60    4.54
   4   3 -19  102.66    5.32
  -4  -1 -20    8.76    2.32
   4   3 -20   13.27    2.75
  -4  -1 -21    0.86    1.84
   4   3 -21    0.16    1.81
  -4  -1 -22    5.60    2.29
   4   3 -22   10.48    2.74
  -4  -1 -23   -1.98    1.70
   4   3 -23   -0.45    1.92
  -4  -1 -24    3.12    2.25
   4   3 -24   -1.22    1.87
  -4  -1 -25    0.71    2.11
   4   3 -25    3.07    2.36
  -4  -1 -26   18.26    3.51
   4   3 -26   21.54    3.76
  -4  -1 -27   11.05    3.10
   4   3 -27   16.68    3.57
  -4  -1 -28   50.23    5.03
   4   3 -28   72.66    5.89
  -4  -1 -29    6.81    3.01
   4   3 -29   14.12    3.57
  -6  -4 -28   24.82    4.07
   6   2 -28   33.40    4.77
  -6  -4 -27    5.75    2.61
   6   2 -27    5.82    2.98
  -6  -4 -26    5.65    2.62
   6   2 -26    6.80    2.92
  -6  -4 -25   28.89    3.90
   6   2 -25   45.21    4.81
  -6  -4 -24    5.16    2.30
   6   2 -24    8.21    2.93
  -6  -4 -23   -1.53    1.60
   6   2 -23    1.03    2.20
  -6  -4 -22   16.66    2.98
   6   2 -22   28.63    3.88
  -6  -4 -21   90.31    5.12
   6   2 -21  151.43    6.79
  -6  -4 -20   -2.39    1.37
   6   2 -20   -0.85    1.88
  -6  -4 -19    2.30    1.80
   6   2 -19    2.02    2.07
  -6  -4 -18    0.56    1.52
   6   2 -18    0.72    1.89
  -6  -4 -17   24.16    2.98
   6   2 -17   38.31    3.95
   6   4  16   15.15    2.66
  -6  -4 -16    7.50    2.05
  -6  -4 -16    9.50    2.27
   6   2 -16   10.16    2.55
   6   4  15    9.77    2.42
  -6  -4 -15    3.92    1.73
  -6  -4 -15    8.86    2.17
   6   2 -15    7.38    2.29
   6   4  14   26.84    2.98
  -6  -4 -14   11.53    2.11
  -6  -4 -14   19.38    2.45
   6   2 -14   21.54    2.85
   6   4  13    9.24    2.27
  -6  -4 -13    4.37    1.61
  -6  -4 -13    9.08    2.01
   6   2 -13    9.72    2.21
   6   4  12   -0.52    1.77
  -6  -4 -12    0.08    1.21
  -6  -4 -12   -0.26    1.43
   6   2 -12    0.22    1.22
   6   2 -12    0.32    1.53
   6   4  11   16.49    2.44
  -6  -4 -11    7.06    1.59
  -6  -4 -11   14.38    2.10
   6   2 -11   18.26    2.27
   6   2 -11   18.05    2.47
   6   4  10   56.35    3.57
  -6  -4 -10   21.87    2.25
  -6  -4 -10   44.34    3.19
   6   2 -10   52.59    2.81
   6   2 -10   46.97    3.45
   6   4   9  147.21    4.67
  -6  -4  -9   52.67    2.82
  -6  -4  -9  129.41    4.26
   6   2  -9  151.33    4.00
   6   2  -9  129.71    4.65
   6   4   8   27.99    2.84
  -6  -4  -8    8.40    1.43
  -6  -4  -8   28.74    2.69
   6   2  -8   29.01    2.48
   6   2  -8   21.22    2.57
   6   4   7   11.23    2.03
  -6  -4  -7    2.18    1.01
  -6  -4  -7   10.76    1.69
   6   2  -7   10.25    1.73
   6   2  -7    9.89    1.76
   6   4   6  144.23    4.47
  -6  -4  -6  131.15    4.07
   6   2  -6  146.62    4.12
   6   2  -6  114.51    4.01
   6   4   5  426.27    7.01
   6   2  -5  447.13    6.58
   6   2  -5  325.67    6.13
   6   4   4   11.77    1.97
   6   2  -4   12.66    1.86
   6   2  -4   10.48    1.73
   6   4   3    0.58    1.40
   6   2  -3    0.55    1.39
   6   4   2    0.15    0.40
   6   2  -2   86.47    3.43
   6   4   1   28.64    2.56
   6   2  -1   30.58    2.68
   6   4   0   55.85    3.11
   6   2   0   52.46    3.04
   6   4  -1    6.60    1.68
   6   2   1    3.05    1.57
   6   4  -2  546.52    7.51
   6   2   2  535.57    7.54
   6   4  -3   36.93    2.80
   6   4  -3   27.91    2.31
   6   2   3   -0.36    0.42
   6   4  -4  308.26    5.74
   6   4  -4  242.12    4.95
   6   2   4  314.41    6.08
   6   4  -5   92.74    3.59
   6   4  -5   78.31    3.26
   6   2   5   90.71    3.84
   6   4  -6    0.60    1.35
   6   4  -6    0.23    1.04
   6   2   6   -0.07    1.47
  -6  -2  -7   14.42    1.79
   6   4  -7   47.42    2.89
   6   4  -7   45.16    2.86
   6   2   7   48.05    3.29
  -6  -2  -8    0.27    0.95
   6   4  -8    0.06    1.26
   6   4  -8    1.71    1.23
   6   2   8   -0.02    1.54
  -6  -2  -9    6.19    1.51
  -6  -2  -9   14.68    1.74
   6   4  -9   17.02    1.98
   6   4  -9   15.14    2.07
   6   2   9   16.54    2.39
  -6  -2 -10    7.28    1.64
  -6  -2 -10   17.43    1.95
   6   4 -10   18.92    2.32
   6   4 -10   17.63    2.36
   6   2  10   18.34    2.51
  -6  -2 -11    1.27    1.28
  -6  -2 -11    2.03    1.39
   6   4 -11    1.70    1.34
   6   4 -11    0.65    1.41
   6   2  11    0.54    1.83
  -6  -2 -12    6.44    1.71
  -6  -2 -12   12.19    1.88
   6   4 -12   13.56    1.91
   6   4 -12   12.81    2.26
   6   2  12   13.36    2.48
  -6  -2 -13   42.37    3.24
  -6  -2 -13   78.78    3.68
   6   4 -13   71.45    3.20
   6   4 -13   77.23    4.30
   6   2  13   85.77    4.34
  -6  -2 -14   40.62    3.37
   6   4 -14   73.75    4.46
   6   2  14   78.01    4.36
  -6  -2 -15   11.85    2.37
   6   4 -15   24.19    3.17
   6   2  15   28.37    3.23
  -6  -2 -16   76.67    4.37
   6   4 -16  134.14    5.81
   6   2  16  147.06    5.55
  -6  -2 -17   -0.10    1.56
   6   4 -17   -1.04    1.76
   6   2  17   -1.08    2.04
  -6  -2 -18   13.94    2.65
   6   4 -18   20.65    3.10
  -6  -2 -19    1.21    1.71
   6   4 -19    0.28    1.91
  -6  -2 -20   -0.94    1.60
   6   4 -20    0.83    2.05
  -6  -2 -21   13.95    2.76
   6   4 -21   18.79    3.28
  -6  -2 -22    6.10    2.35
   6   4 -22    6.83    2.58
  -6  -2 -23   13.59    2.96
   6   4 -23   23.93    3.83
  -6  -2 -24    5.05    2.35
   6   4 -24    7.86    2.77
  -6  -2 -25   46.73    4.60
   6   4 -25   73.21    5.67
  -6  -2 -26   13.25    3.32
   6   4 -26   20.88    3.81
  -6  -2 -27   18.53    3.59
   6   4 -27   27.23    4.31
  -6  -2 -28   10.07    3.20
   6   4 -28    9.44    3.38
  -8  -5 -26    0.38    2.16
   8   3 -26   -0.20    2.63
  -8  -5 -25   -2.18    1.73
   8   3 -25    2.45    2.66
  -8  -5 -24    0.14    1.90
   8   3 -24   -0.83    2.39
  -8  -5 -23    1.45    1.89
   8   3 -23    6.26    2.94
  -8  -5 -22    6.47    2.26
   8   3 -22   14.58    3.42
  -8  -5 -21   -0.70    1.58
   8   3 -21    0.41    2.25
  -8  -5 -20    6.53    2.20
   8   3 -20   18.16    3.42
  -8  -5 -19   57.76    4.18
   8   3 -19  162.97    7.08
  -8  -5 -18   20.52    2.94
   8   3 -18   62.12    4.89
   8   5  17    6.82    2.55
  -8  -5 -17    0.31    1.47
   8   3 -17    4.49    2.33
   8   5  16  171.92    6.16
  -8  -5 -16   50.74    3.69
   8   3 -16  146.13    6.29
   8   5  15   90.97    4.93
  -8  -5 -15   27.73    2.91
  -8  -5 -15   83.99    4.53
   8   3 -15   83.88    5.06
   8   5  14   41.94    4.04
  -8  -5 -14   16.11    2.53
  -8  -5 -14   42.82    3.90
   8   3 -14   40.61    4.10
   8   5  13    7.61    2.68
  -8  -5 -13    2.54    1.57
  -8  -5 -13    5.88    2.38
   8   3 -13    6.32    2.36
   8   5  12   32.71    3.85
  -8  -5 -12    7.38    1.82
  -8  -5 -12   32.90    3.64
   8   3 -12   26.99    3.26
   8   5  11   18.86    3.03
  -8  -5 -11    5.12    1.64
  -8  -5 -11   15.31    2.51
   8   3 -11   17.09    2.40
   8   3 -11   17.56    2.87
   8   5  10   93.39    4.87
   8   3 -10   97.75    4.18
   8   3 -10   85.41    4.61
   8   5   9   55.50    4.23
   8   3  -9   61.38    3.66
   8   3  -9   45.36    3.87
   8   5   8  225.10    6.50
   8   3  -8  219.11    5.68
   8   3  -8  183.02    5.82
   8   5   7    3.91    2.20
   8   3  -7    4.06    1.95
   8   3  -7    3.73    1.76
   8   5   6    0.63    1.94
   8   3  -6    3.33    1.89
   8   3  -6    3.10    1.64
   8   5   5   51.71    3.89
   8   3  -5   51.93    3.66
   8   3  -5   39.75    3.26
   8   5   4   93.18    4.51
   8   3  -4   89.74    4.25
   8   3  -4   60.14    3.61
   8   5   3   10.56    2.01
   8   3  -3   10.93    2.22
   8   5   2    0.77    1.09
   8   3  -2    5.99    2.04
   8   5   1   20.43    2.66
   8   3  -1   21.50    2.73
   8   5   0   21.99    2.75
   8   3   0   21.74    2.72
   8   5  -1   54.14    3.80
   8   3   1   52.97    3.73
   8   5  -2    7.74    2.18
   8   3   2    8.56    2.20
   8   5  -3   49.95    3.54
   8   5  -3   39.16    3.05
   8   3   3    0.09    0.74
   8   5  -4   -0.70    1.74
   8   5  -4    0.79    1.30
   8   3   4   -0.74    0.85
   8   5  -5  100.63    4.39
   8   5  -5   81.14    3.93
   8   3   5  101.35    4.72
   8   5  -6   19.75    2.57
   8   5  -6   21.34    2.54
   8   3   6   21.66    2.94
   8   5  -7   29.78    3.15
   8   5  -7   25.82    2.76
   8   3   7   29.48    3.56
   8   5  -8    0.03    1.69
   8   5  -8    1.27    1.56
   8   3   8   -0.35    2.04
   8   5  -9  205.70    5.63
   8   5  -9  195.21    5.90
   8   3   9  209.90    6.50
   8   5 -10    6.48    2.00
   8   5 -10    6.75    2.08
   8   3  10    4.21    2.35
  -8  -3 -11   21.91    2.74
   8   5 -11   72.27    3.86
   8   5 -11   73.20    4.41
   8   3  11   86.13    4.88
  -8  -3 -12   -0.27    1.42
   8   5 -12    2.32    1.77
   8   5 -12    5.38    2.18
   8   3  12    1.30    2.35
  -8  -3 -13    6.97    2.00
   8   5 -13   19.10    2.94
   8   3  13   22.18    3.28
  -8  -3 -14    0.45    1.48
   8   5 -14    0.11    1.82
   8   3  14    1.66    2.38
  -8  -3 -15   75.12    4.30
   8   5 -15  193.50    6.81
   8   3  15  202.18    6.71
  -8  -3 -16   22.88    3.08
   8   5 -16   47.96    4.26
   8   3  16   52.81    4.37
  -8  -3 -17   19.44    2.87
   8   5 -17   40.73    4.17
   8   3  17   42.42    4.18
  -8  -3 -18   13.46    2.72
   8   5 -18   32.50    4.05
   8   3  18   32.06    3.81
  -8  -3 -19   24.66    3.44
   8   5 -19   58.38    4.83
  -8  -3 -20    2.30    1.89
   8   5 -20    6.98    2.66
  -8  -3 -21    6.67    2.37
   8   5 -21   17.92    3.47
  -8  -3 -22   15.11    3.05
   8   5 -22   37.50    4.54
  -8  -3 -23    0.93    1.98
   8   5 -23    1.13    2.45
  -8  -3 -24    3.95    2.24
   8   5 -24    5.69    3.02
  -8  -3 -25    5.20    2.57
   8   5 -25   10.29    3.36
  -8  -3 -26   19.82    3.73
   8   5 -26   46.30    5.31
 -10  -6 -24    7.04    2.60
  10   4 -24   22.96    4.32
 -10  -6 -23    5.87    2.43
  10   4 -23   24.74    4.46
 -10  -6 -22    5.21    2.31
  10   4 -22    3.82    2.84
 -10  -6 -21   12.96    2.95
  10   4 -21   43.03    5.02
 -10  -6 -20   14.70    2.89
  10   4 -20   49.12    5.10
 -10  -6 -19    1.33    1.67
  10   4 -19    1.68    2.45
 -10  -6 -18    8.18    2.33
  10   4 -18   26.71    4.10
  10   6  17  116.07    5.91
 -10  -6 -17   28.66    3.30
  10   4 -17  115.91    6.34
  10   6  16    2.30    2.63
 -10  -6 -16   -1.00    1.36
  10   4 -16    3.89    2.48
  10   6  15  101.07    5.56
  10   4 -15   97.03    5.68
  10   6  14   39.77    4.20
  10   4 -14   47.47    4.41
  10   6  13    0.25    2.30
  10   4 -13   -0.49    1.91
  10   6  12    7.29    2.71
  10   4 -12    3.36    2.16
  10   6  11  112.79    5.60
  10   4 -11  124.76    5.07
  10   4 -11  105.47    5.47
  10   6  10    9.35    2.97
  10   4 -10   10.51    2.50
  10   4 -10   11.88    2.65
  10   6   9   21.32    3.45
  10   4  -9   17.32    2.82
  10   4  -9   17.35    2.94
  10   6   8    3.20    2.56
  10   4  -8    4.52    2.31
  10   4  -8    3.22    2.06
  10   6   7    3.73    2.66
  10   4  -7    5.62    2.45
  10   4  -7    4.11    2.09
  10   6   6    3.32    2.57
  10   4  -6    1.55    2.30
  10   4  -6    2.41    2.02
  10   6   5  197.38    6.87
  10   4  -5  199.65    6.46
  10   4  -5  152.64    5.84
  10   6   4    2.38    2.45
  10   4  -4    4.96    2.51
  10   4  -4    3.04    2.00
  10   6   3   56.82    4.50
  10   4  -3   64.89    4.55
  10   6   2   23.41    3.29
  10   4  -2   22.17    3.29
  10   6   1    1.08    2.30
  10   4  -1    1.03    2.36
  10   6   0   25.92    3.40
  10   4   0   23.60    3.32
  10   6  -1   32.82    4.02
  10   4   1   35.50    4.06
  10   6  -2  100.94    5.25
  10   6  -2   86.25    4.38
  10   4   2  105.83    5.37
  10   6  -3    0.92    2.31
  10   6  -3    1.50    1.72
  10   4   3    0.42    2.31
  10   6  -4   32.13    3.83
  10   6  -4   28.01    3.38
  10   4   4   29.85    3.62
  10   6  -5   60.35    4.37
  10   6  -5   51.80    3.87
  10   4   5   54.41    4.44
  10   6  -6   16.62    2.94
  10   6  -6   17.82    2.76
  10   4   6   15.43    3.15
  10   6  -7   -1.90    2.00
  10   6  -7   -2.18    1.68
  10   4   7    0.28    2.50
  10   6  -8    1.17    2.22
  10   6  -8    1.48    1.90
  10   4   8    2.67    2.63
  10   6  -9   42.87    3.87
  10   6  -9   41.10    3.85
  10   4   9   42.69    4.40
  10   6 -10   72.83    4.41
  10   6 -10   62.23    4.47
  10   4  10   73.38    5.03
  10   6 -11   44.27    3.77
  10   6 -11   39.34    3.93
  10   4  11   43.72    4.39
  10   6 -12    9.72    2.35
  10   6 -12    8.71    2.53
  10   4  12   11.49    3.05
  10   6 -13   10.75    2.73
  10   4  13   14.88    3.20
  10   6 -14  114.67    5.75
  10   4  14  107.47    5.73
  10   6 -15    4.29    2.35
  10   4  15    3.61    2.76
 -10  -4 -16   15.84    2.80
  10   6 -16   50.76    4.63
  10   4  16   52.61    4.71
 -10  -4 -17    3.41    1.91
  10   6 -17   11.19    3.05
  10   4  17    9.05    3.03
 -10  -4 -18   12.35    2.74
  10   6 -18   35.29    4.34
  10   4  18   32.62    4.16
 -10  -4 -19    3.28    1.95
  10   6 -19    3.14    2.51
 -10  -4 -20   16.47    3.14
  10   6 -20   39.97    4.77
 -10  -4 -21    2.78    2.11
  10   6 -21    6.58    2.92
 -10  -4 -22    8.38    2.67
  10   6 -22   25.17    4.22
 -10  -4 -23    0.24    1.92
  10   6 -23   -1.08    2.52
 -10  -4 -24    4.11    2.47
  10   6 -24   15.26    3.89
  12   5 -21    0.57    2.86
  12   5 -20   43.96    5.34
  12   5 -19    1.42    2.78
  12   5 -18   91.78    6.40
  12   7  17   23.07    4.07
  12   5 -17   19.93    3.85
  12   7  16  193.76    7.88
  12   5 -16  191.22    8.00
  12   7  15   32.49    4.43
  12   5 -15   32.80    4.32
  12   7  14    9.95    3.27
  12   5 -14    9.51    3.11
  12   7  13    0.14    2.62
  12   5 -13    0.71    2.37
  12   7  12    1.52    2.79
  12   5 -12    1.27    2.40
  12   7  11   -1.96    2.51
  12   5 -11   -0.59    2.20
  12   7  10   -0.84    2.54
  12   5 -10    0.66    2.20
  12   5 -10    0.02    2.12
  12   7   9   29.09    4.10
  12   5  -9   32.39    3.83
  12   5  -9   25.94    3.59
  12   7   8   89.28    5.60
  12   5  -8   85.29    5.01
  12   5  -8   74.92    5.04
  12   7   7   57.17    4.81
  12   5  -7   58.25    4.46
  12   5  -7   46.22    4.27
  12   7   6   59.97    4.83
  12   5  -6   56.60    4.45
  12   5  -6   45.23    4.24
  12   7   5   -1.20    2.31
  12   5  -5    0.67    2.29
  12   5  -5    0.79    1.93
  12   7   4    5.85    2.79
  12   5  -4    7.58    2.76
  12   5  -4    5.96    2.28
  12   7   3    8.58    2.84
  12   5  -3   12.55    3.05
  12   5  -3   11.57    2.67
  12   7   2   22.79    3.57
  12   5  -2   25.80    3.59
  12   7   1   19.70    3.46
  12   5  -1   17.40    3.37
  12   7   0   -2.70    2.21
  12   5   0   -0.13    2.42
  12   7  -1   15.24    3.25
  12   5   1   13.41    3.21
  12   7  -2    0.39    2.31
  12   7  -2   -0.27    1.83
  12   5   2   -1.57    2.35
  12   7  -3    5.34    2.65
  12   7  -3    4.81    2.22
  12   5   3    4.86    2.72
  12   7  -4   21.50    3.49
  12   7  -4   18.59    2.95
  12   5   4   20.35    3.45
  12   7  -5   85.98    5.14
  12   7  -5   79.60    4.83
  12   5   5   84.87    5.38
  12   7  -6   46.72    4.23
  12   7  -6   46.28    4.15
  12   5   6   46.72    4.58
  12   7  -7   33.63    3.81
  12   7  -7   31.73    3.83
  12   5   7   32.36    4.19
  12   7  -8   22.05    3.38
  12   7  -8   20.28    3.26
  12   5   8   20.95    3.71
  12   7  -9  308.46    8.43
  12   7  -9  279.09    8.26
  12   5   9  312.52    9.21
  12   7 -10    0.43    2.21
  12   7 -10   -1.00    2.01
  12   5  10   -0.61    2.62
  12   7 -11  114.18    5.61
  12   7 -11  107.34    5.88
  12   5  11  109.87    6.15
  12   7 -12   14.43    3.14
  12   5  12   13.55    3.53
  12   7 -13   11.79    3.06
  12   5  13   11.49    3.42
  12   7 -14   20.42    3.59
  12   5  14   24.31    4.08
  12   7 -15   25.21    4.02
  12   5  15   23.88    4.08
  12   7 -16   99.04    6.19
  12   5  16   90.94    6.09
  12   7 -17   51.24    5.17
  12   5  17   39.13    4.90
  12   7 -18   17.91    3.76
  12   5  18   20.29    4.04
  12   7 -19    9.18    3.34
  12   7 -20   10.57    3.42
  12   7 -21   31.32    4.82
  14   6 -17   37.11    5.23
  14   8  16    3.72    3.28
  14   6 -16    5.34    3.15
  14   8  15  112.86    6.96
  14   6 -15  107.72    6.82
  14   8  14    1.61    3.14
  14   6 -14    3.60    2.98
  14   8  13    0.33    2.99
  14   6 -13   -0.74    2.58
  14   8  12   26.58    4.37
  14   6 -12   22.81    4.15
  14   8  11   73.45    5.80
  14   6 -11   68.87    5.62
  14   8  10   13.34    3.66
  14   6 -10   12.43    3.35
  14   8   9   31.23    4.53
  14   6  -9   30.20    4.05
  14   6  -9   29.07    4.16
  14   8   8   13.09    3.61
  14   6  -8   13.11    3.21
  14   6  -8    8.71    2.93
  14   8   7    0.44    2.74
  14   6  -7    2.05    2.65
  14   6  -7    0.51    2.31
  14   8   6    9.69    3.28
  14   6  -6    9.87    3.10
  14   6  -6    9.62    3.01
  14   8   5   13.12    3.45
  14   6  -5   11.02    3.25
  14   6  -5   10.31    2.98
  14   8   4   95.94    6.03
  14   6  -4   85.84    5.70
  14   6  -4   66.44    5.10
  14   8   3   39.66    4.56
  14   6  -3   38.12    4.60
  14   6  -3   30.15    3.97
  14   8   2   47.13    4.77
  14   6  -2   46.60    4.87
  14   6  -2   35.43    4.39
  14   8   1    8.84    3.12
  14   6  -1    6.70    3.16
  14   8   0   41.85    4.59
  14   8   0   34.78    4.03
  14   6   0   39.91    4.56
  14   8  -1   18.84    3.58
  14   8  -1   12.25    2.89
  14   6   1   13.52    3.50
  14   8  -2    6.92    2.96
  14   8  -2    5.55    2.50
  14   6   2    2.74    2.92
  14   8  -3    4.37    2.90
  14   8  -3    1.91    2.32
  14   6   3    3.91    2.91
  14   8  -4    0.78    2.61
  14   8  -4    0.94    2.16
  14   6   4    3.46    2.84
  14   8  -5   16.80    3.46
  14   8  -5   11.73    3.01
  14   6   5   12.53    3.43
  14   8  -6   27.40    4.00
  14   8  -6   27.03    3.86
  14   6   6   27.96    4.31
  14   8  -7    4.30    2.73
  14   8  -7    1.48    2.40
  14   6   7    3.34    3.03
  14   8  -8    8.59    3.05
  14   8  -8    6.39    2.71
  14   6   8    3.00    3.07
  14   8  -9   22.99    3.70
  14   8  -9   29.89    4.05
  14   6   9   25.29    4.33
  14   8 -10    3.09    2.75
  14   8 -10    0.87    2.46
  14   6  10    2.06    3.13
  14   8 -11   73.67    5.67
  14   6  11   70.41    5.84
  14   8 -12   21.34    3.88
  14   6  12   14.95    3.89
  14   8 -13   10.49    3.32
  14   6  13   11.92    3.77
  14   8 -14   13.30    3.47
  14   6  14   18.75    4.30
  14   8 -15   31.24    4.53
  14   6  15   31.31    4.85
  14   8 -16    0.33    2.81
  14   8 -17    6.02    3.36
  16   7 -10    2.31    2.93
  16   7  -9    1.09    2.88
  16   7  -8    9.09    3.48
  16   7  -8   12.20    3.63
  16   7  -7   14.97    3.80
  16   7  -7   11.61    3.43
  16   7  -6   60.18    5.45
  16   7  -6   54.57    5.34
  16   7  -5    0.71    2.91
  16   7  -5    4.34    2.91
  16   7  -4   18.78    4.07
  16   7  -4   14.36    3.56
  16   7  -3   35.97    4.85
  16   7  -3   29.55    4.39
  16   7  -2    9.24    3.56
  16   7  -2    5.97    3.16
  16   7  -1    1.02    3.04
  16   7  -1   -1.30    2.57
  16   9   0    6.12    3.40
  16   7   0   10.89    3.62
  16   7   0    8.11    3.32
  16   9  -1    9.96    3.55
  16   7   1   10.64    3.79
  16   9  -2    2.52    3.02
  16   9  -3    0.61    2.88
  16   9  -4   -0.35    2.89
  16   9  -5    4.02    3.13
  16   9  -6  113.75    6.79
  16   9  -7    8.89    3.42
  16   9  -8   49.76    5.26
  16   9  -9  131.84    7.26
  -1  -2 -30    2.78    2.60
   1  -1 -30    3.38    2.73
  -1  -2 -29    8.05    3.00
   1  -1 -29   10.11    3.19
  -1  -2 -28   -0.19    2.18
   1  -1 -28   -1.48    2.16
  -1  -2 -27   15.28    3.20
   1  -1 -27   15.90    3.29
  -1  -2 -26    9.65    2.82
   1  -1 -26   10.24    2.95
  -1  -2 -25    1.96    2.17
   1  -1 -25    4.26    2.37
  -1  -2 -24    1.07    1.99
   1  -1 -24    0.78    2.01
  -1  -2 -23    1.85    1.97
   1  -1 -23    1.12    2.01
   1  -1 -23    0.56    2.03
  -1  -2 -22   19.52    3.04
   1  -1 -22   18.05    3.03
  -1  -2 -21   68.11    4.50
  -1  -2 -21   22.38    2.84
   1  -1 -21   70.56    4.61
  -1  -2 -20  198.27    6.72
  -1  -2 -20   63.34    4.20
   1  -1 -20  197.24    6.75
  -1  -2 -19   86.58    4.74
  -1  -2 -19   29.37    3.57
   1  -1 -19   88.76    4.88
  -1  -2 -18   71.07    4.21
  -1  -2 -18   22.77    2.65
   1  -1 -18   76.89    4.41
  -1  -2 -17   61.09    3.89
  -1  -2 -17   23.98    2.68
   1  -1 -17   67.44    4.08
  -1  -2 -16    3.44    1.64
  -1  -2 -16    1.41    1.46
   1  -1 -16    3.65    1.73
  -1  -2 -15    0.60    1.37
  -1  -2 -15    0.04    1.22
   1  -1 -15    1.02    1.37
   1   2  14  120.32    2.59
  -1  -2 -14   88.65    3.90
  -1  -2 -14   27.48    2.71
   1  -1 -14   94.33    4.03
   1   2  13   99.49    2.37
  -1  -2 -13   73.91    3.41
  -1  -2 -13   28.83    2.61
   1  -1 -13   76.74    3.61
   1   2  12  131.23    2.54
  -1  -2 -12   90.71    3.48
  -1  -2 -12   33.69    2.53
   1  -1 -12  100.90    3.77
   1   2  11   38.73    1.74
  -1  -2 -11   25.73    2.28
  -1  -2 -11    8.32    1.37
   1  -1 -11   31.08    2.45
   1   2  10  104.29    2.20
  -1  -2 -10   73.53    2.94
  -1  -2 -10   -0.16    0.49
   1  -1 -10   76.35    3.11
   1   2   9    0.46    0.71
  -1  -2  -9    0.93    0.85
  -1  -2  -9    0.03    0.73
   1  -1  -9    0.15    0.86
   1   2   8  174.49    2.48
  -1  -2  -8  118.45    3.10
  -1  -2  -8   41.64    2.28
   1  -1  -8  136.03    3.46
   1   2   7  315.72    3.08
  -1  -2  -7  225.32    3.85
  -1  -2  -7   66.98    2.44
   1  -1  -7  245.94    4.22
   1   2   6    1.07    0.74
  -1  -2  -6    0.60    0.72
  -1  -2  -6    0.35    0.84
   1  -1  -6    0.45    0.81
   1   2   5   24.02    1.42
  -1  -2  -5   17.21    1.51
  -1  -2  -5    4.31    0.98
   1  -1  -5   16.40    1.61
   1   2   4   39.55    1.43
  -1  -2  -4    8.30    0.97
   1  -1  -4   30.44    1.57
   1   2   3   18.54    1.07
  -1  -2  -3    5.77    0.76
   1  -1  -3   17.72    0.78
   1  -1  -3   15.37    1.06
   1   2   2    6.56    0.64
  -1   1   1  524.05    3.17
   1   2   1  526.94    3.48
  -1   1   0   17.65    0.79
   1   2   0    0.11    0.06
  -1   1  -1    0.13    0.16
   1   2  -1   35.03    1.12
  -1   1  -2    7.33    0.86
   1   2  -2    5.86    0.65
  -1   1  -3   34.48    1.38
  -1   1  -3    0.05    0.07
   1   2  -3   24.47    1.18
  -1   1  -4  155.61    2.57
  -1   1  -4    0.02    0.05
   1   2  -4   80.11    1.88
   1   2  -4  152.87    2.64
  -1   1  -5    1.24    0.80
  -1   1  -5    0.12    0.10
   1   2  -5    0.15    0.72
   1   2  -5    0.14    0.74
  -1   1  -6  737.82    5.73
  -1   1  -6    0.12    0.12
   1   2  -6  133.03    2.49
   1   2  -6  700.68    6.38
  -1   1  -7   42.55    1.90
  -1   1  -7    0.21    0.18
   1   2  -7   10.98    1.07
   1   2  -7    1.43    0.52
  -1   1  -8  113.27    2.67
  -1   1  -8    0.07    0.28
  -1   1  -8   28.50    1.57
   1   2  -8   40.90    1.68
   1   2  -8    0.01    0.31
  -1   1  -9   18.17    1.59
  -1   1  -9    0.19    0.52
  -1   1  -9    5.70    0.90
   1   2  -9    8.12    1.00
   1   2  -9   13.48    1.61
  -1   1 -10  131.60    3.01
  -1   1 -10   29.86    1.82
   1   2 -10   74.11    2.20
   1   2 -10  113.82    3.58
  -1   1 -11  186.54    3.63
  -1   1 -11  145.53    4.13
  -1   1 -11   47.16    2.18
   1   2 -11  122.12    2.74
   1   2 -11  156.79    4.32
  -1   1 -12   49.42    2.31
  -1   1 -12   40.27    2.70
  -1   1 -12   12.53    1.36
   1   2 -12   38.41    1.86
   1   2 -12   40.90    2.78
  -1   1 -13   16.04    2.04
  -1   1 -13    6.03    1.08
   1   2 -13   18.69    1.62
   1   2 -13   21.62    2.43
  -1   1 -14  155.92    4.97
  -1   1 -14    0.61    0.58
   1   2 -14  163.38    3.38
   1   2 -14  163.97    5.04
   1  -1  14  199.63    4.06
  -1   1 -15    0.21    0.55
  -1   1 -15    0.97    1.10
   1   2 -15    5.81    1.18
   1   2 -15    0.19    0.40
   1  -1  15    1.01    0.67
  -1   1 -16    0.10    0.53
  -1   1 -16   10.46    1.67
   1   2 -16    0.35    0.49
   1  -1  16    0.13    0.63
  -1   1 -17   21.51    2.67
  -1   1 -17   11.87    1.80
   1   2 -17    0.26    0.63
  -1   1 -18    5.78    2.00
   1   2 -18    4.33    1.92
  -1   1 -19    1.34    1.75
   1   2 -19    0.80    1.77
  -1   1 -20    8.51    2.29
   1   2 -20   10.80    2.44
  -1   1 -21    2.79    1.91
   1   2 -21    3.37    1.93
  -1   1 -22   21.51    3.21
   1   2 -22   16.67    2.91
  -1   1 -23    1.69    1.97
   1   2 -23    0.97    1.79
  -1   1 -24    2.36    2.08
   1   2 -24    4.74    2.27
  -1   1 -25    6.20    2.59
   1   2 -25    7.13    2.57
  -1   1 -26   16.95    3.30
   1   2 -26   19.95    3.54
  -1   1 -27    6.73    2.74
   1   2 -27    6.45    2.68
  -1   1 -28    3.86    2.55
   1   2 -28    5.97    2.75
  -1   1 -29   42.66    4.93
   1   2 -29   46.89    5.05
  -1   1 -30   -0.77    2.35
   1   2 -30    0.89    2.69
  -3  -3 -29    1.60    2.42
   3   0 -29    2.23    2.70
  -3  -3 -28   42.59    4.68
   3   0 -28   46.73    4.99
  -3  -3 -27   34.44    4.27
   3   0 -27   46.59    4.80
  -3  -3 -26   20.22    3.49
   3   0 -26   22.43    3.66
  -3  -3 -25   13.06    2.89
   3   0 -25   16.42    3.27
  -3  -3 -24    4.27    2.26
   3   0 -24    2.63    2.30
  -3  -3 -23   13.62    2.84
   3   0 -23   18.07    3.17
  -3  -3 -22   11.84    2.61
   3   0 -22   16.27    3.00
  -3  -3 -21    6.35    2.16
   3   0 -21   12.09    2.61
  -3  -3 -20   79.08    4.64
  -3  -3 -20   40.20    3.75
   3   0 -20   95.98    5.19
  -3  -3 -19   95.30    4.84
  -3  -3 -19   52.94    3.93
   3   0 -19  132.59    5.79
  -3  -3 -18  260.80    7.14
  -3  -3 -18  132.88    5.12
   3   0 -18  329.29    8.26
  -3  -3 -17   20.00    2.71
  -3  -3 -17    9.01    2.00
   3   0 -17   24.80    3.01
  -3  -3 -16   30.27    3.04
  -3  -3 -16   15.85    2.22
   3   0 -16    0.43    1.19
   3   3  15   -0.44    0.55
  -3  -3 -15  141.88    4.89
  -3  -3 -15   69.06    3.74
   3   0 -15   -0.05    0.59
  -3  -3 -14  236.90    5.89
  -3  -3 -14  117.18    4.22
   3   3  13  221.24    4.23
  -3  -3 -13  143.24    4.51
  -3  -3 -13   72.48    3.41
   3   0 -13  188.20    5.37
   3   3  12   73.96    2.92
  -3  -3 -12   46.06    2.83
  -3  -3 -12   25.89    2.50
   3   0 -12   61.04    3.31
   3   3  11    7.16    1.40
  -3  -3 -11    3.29    1.20
  -3  -3 -11    3.58    1.20
   3   0 -11    4.37    1.34
   3   3  10    0.83    1.10
  -3  -3 -10    0.14    0.88
  -3  -3 -10    0.57    0.98
   3   0 -10    0.26    0.59
   3   0 -10    0.85    1.02
   3   3   9   75.09    2.73
  -3  -3  -9   45.97    2.40
  -3  -3  -9   -0.13    0.59
   3   0  -9   65.07    1.78
   3   0  -9   18.38    1.78
   3   3   8    2.19    1.05
  -3  -3  -8    1.76    0.85
  -3  -3  -8    0.49    0.61
   3   0  -8    1.23    0.71
   3   0  -8   -0.08    0.48
   3   3   7  590.12    6.06
  -3  -3  -7  335.16    4.80
  -3  -3  -7  351.65    5.10
   3   0  -7  563.02    4.54
   3   0  -7   -0.07    0.25
   3   3   6  111.58    2.99
  -3  -3  -6   59.79    2.15
  -3  -3  -6   74.63    2.70
   3   0  -6  108.08    2.36
   3   0  -6   -0.15    0.14
   3   3   5   76.29    2.58
  -3  -3  -5   36.26    1.73
  -3  -3  -5   57.90    2.43
   3   0  -5   79.71    2.21
   3   0  -5   -0.11    0.11
   3   3   4    0.52    1.02
  -3  -3  -4   -0.15    0.57
  -3  -3  -4    1.92    0.91
   3   0  -4    0.14    0.87
   3   0  -4    0.06    0.13
   3   3   3   19.52    2.04
  -3  -3  -3    6.76    0.83
  -3  -3  -3   18.58    1.97
   3   0  -3   25.52    1.90
   3   0  -3    0.11    0.14
   3   3   2   46.91    2.38
  -3  -3  -2   36.92    2.15
   3   0  -2   47.33    2.13
   3   3   1    0.15    0.15
  -3  -3  -1   31.02    1.45
   3   0  -1   93.79    2.68
   3   3   0   40.19    2.09
   3   0   0   41.54    2.29
   3   3  -1   15.19    1.86
   3   0   1   18.25    1.97
   3   3  -2   31.96    2.10
   3   3  -2   25.76    1.61
   3   0   2   -0.02    0.19
  -3   0  -3    0.55    0.68
   3   3  -3    1.45    1.01
   3   3  -3    1.95    0.78
   3   0   3    0.63    0.50
  -3   0  -4  129.70    3.02
   3   3  -4  287.03    4.10
   3   3  -4  265.58    3.95
   3   0   4  301.30    4.56
  -3   0  -5   70.04    2.44
  -3   0  -5  125.46    2.43
   3   3  -5  128.17    2.96
   3   3  -5  120.19    2.99
   3   0   5  136.74    3.37
  -3   0  -6  311.84    4.91
  -3   0  -6  499.28    4.46
   3   3  -6  495.29    5.29
   3   3  -6  493.42    5.87
   3   0   6  560.38    6.28
  -3   0  -7    4.88    1.07
  -3   0  -7    9.09    1.02
   3   3  -7    9.78    1.23
   3   3  -7    0.00    0.46
   3   0   7   11.48    1.47
  -3   0  -8   69.85    2.83
  -3   0  -8   90.90    2.39
   3   3  -8   80.74    2.47
   3   3  -8   92.69    3.16
  -3   0  -9   68.38    2.91
  -3   0  -9   79.05    2.40
   3   3  -9   66.32    2.32
   3   3  -9   85.37    3.29
   3   0   9   -0.37    0.57
  -3   0 -10   -0.21    0.90
  -3   0 -10    0.83    0.80
   3   3 -10    0.61    0.81
   3   3 -10    0.17    1.00
   3   0  10    0.77    1.01
  -3   0 -11    6.05    1.48
  -3   0 -11    4.95    1.03
   3   3 -11    2.26    0.93
   3   3 -11    6.35    1.49
   3   0  11    9.06    1.60
  -3   0 -12   45.67    2.96
  -3   0 -12   41.92    2.29
   3   3 -12   17.11    1.63
   3   3 -12   60.36    3.28
   3   0  12   67.97    3.18
  -3   0 -13    4.56    1.47
  -3   0 -13    4.46    1.08
   3   3 -13    1.69    0.93
   3   3 -13    8.94    1.88
   3   0  13    9.59    1.77
  -3   0 -14   22.23    2.75
  -3   0 -14   -0.51    0.43
   3   3 -14    8.09    1.26
   3   3 -14   24.69    2.83
   3   0  14   30.72    2.89
  -3   0 -15   -0.34    1.45
  -3   0 -15    0.63    1.15
   3   3 -15    1.95    1.63
   3   0  15    2.07    1.67
  -3   0 -16   56.07    3.75
   3   3 -16   62.55    4.01
   3   0  16   81.88    3.81
  -3   0 -17   67.58    4.22
   3   3 -17   91.73    4.77
  -3   0 -18   23.57    3.06
   3   3 -18   28.34    3.46
  -3   0 -19    1.00    1.80
   3   3 -19    1.47    1.86
  -3   0 -20   11.18    2.46
   3   3 -20   13.19    2.67
  -3   0 -21    0.81    1.83
   3   3 -21    0.47    1.78
  -3   0 -22    4.93    2.20
   3   3 -22    6.89    2.39
  -3   0 -23   11.69    2.80
   3   3 -23   16.77    3.18
  -3   0 -24    4.04    2.29
   3   3 -24    4.65    2.37
  -3   0 -25   10.37    2.81
   3   3 -25   12.94    3.13
  -3   0 -26    2.86    2.27
   3   3 -26    1.85    2.23
  -3   0 -27   16.47    3.39
   3   3 -27   17.43    3.57
  -3   0 -28   22.63    3.88
   3   3 -28   29.33    4.29
  -3   0 -29   24.06    4.24
   3   3 -29   28.18    4.39
  -5  -4 -29   -0.31    2.20
   5   1 -29   -0.22    2.55
  -5  -4 -28    1.55    2.31
   5   1 -28    0.86    2.49
  -5  -4 -27    4.48    2.51
   5   1 -27    2.61    2.63
  -5  -4 -26    3.51    2.28
   5   1 -26    2.78    2.50
  -5  -4 -25    4.02    2.29
   5   1 -25    2.23    2.44
  -5  -4 -24   10.32    2.72
   5   1 -24   24.32    3.93
  -5  -4 -23   15.90    3.05
   5   1 -23   21.66    3.48
  -5  -4 -22    2.23    1.92
   5   1 -22    2.79    2.24
  -5  -4 -21   29.86    3.47
   5   1 -21   47.60    4.44
  -5  -4 -20   28.26    3.34
   5   1 -20   45.82    4.18
  -5  -4 -19    1.17    1.68
   5   1 -19    0.30    1.81
  -5  -4 -18    3.16    1.80
  -5  -4 -18    1.85    1.86
   5   1 -18    1.50    1.92
  -5  -4 -17   49.97    3.75
  -5  -4 -17   65.15    4.08
   5   1 -17   74.83    4.65
   5   4  16   12.74    2.32
  -5  -4 -16    4.77    1.81
  -5  -4 -16    6.69    2.08
   5   1 -16    6.56    2.20
   5   4  15   -1.19    1.69
  -5  -4 -15    0.51    1.45
  -5  -4 -15    1.51    1.66
   5   1 -15   -0.17    1.42
   5   4  14    0.07    1.74
  -5  -4 -14    0.54    1.33
  -5  -4 -14    0.09    1.52
   5   1 -14   -0.13    0.57
   5   4  13   28.28    2.98
  -5  -4 -13   14.49    2.07
  -5  -4 -13   16.01    2.16
   5   1 -13    0.29    0.61
   5   4  12   10.98    2.04
  -5  -4 -12    5.23    1.50
  -5  -4 -12    8.87    1.81
   5   1 -12   10.06    1.37
   5   1 -12    6.93    1.50
   5   4  11    5.63    1.70
  -5  -4 -11    3.84    1.31
  -5  -4 -11    4.20    1.44
   5   1 -11    6.58    1.25
   5   1 -11    4.68    1.60
   5   4  10   19.57    2.21
  -5  -4 -10    9.58    1.53
  -5  -4 -10   14.72    1.85
   5   1 -10   18.81    1.94
   5   1 -10   20.10    2.36
   5   4   9   17.70    2.10
  -5  -4  -9    7.34    1.35
  -5  -4  -9   12.69    1.75
   5   1  -9   16.76    1.95
   5   1  -9   17.56    2.17
   5   4   8   51.25    2.97
  -5  -4  -8   18.80    1.81
  -5  -4  -8   44.68    2.79
   5   1  -8   52.13    2.52
   5   1  -8   45.80    2.91
   5   4   7  148.89    4.20
  -5  -4  -7   50.61    2.38
  -5  -4  -7  123.30    3.84
   5   1  -7  149.41    3.62
   5   1  -7  117.83    3.91
   5   4   6   59.13    3.06
  -5  -4  -6   17.11    1.63
  -5  -4  -6   51.20    2.82
   5   1  -6   62.20    2.75
   5   1  -6   49.14    2.79
   5   4   5   50.44    2.88
  -5  -4  -5   10.58    1.28
  -5  -4  -5   42.42    2.63
   5   1  -5   50.52    2.58
   5   1  -5   40.82    2.52
   5   4   4    3.95    1.46
  -5  -4  -4    4.05    1.18
   5   1  -4    4.87    1.33
   5   1  -4    2.30    1.07
   5   4   3   96.20    3.37
   5   1  -3  101.47    3.25
   5   4   2    0.13    0.50
   5   1  -2  426.52    5.96
   5   4   1    0.16    0.35
   5   1  -1  574.02    6.91
   5   4   0    9.31    1.60
   5   1   0    8.33    1.55
   5   4  -1   27.06    2.36
   5   1   1   27.82    2.36
   5   4  -2    1.10    1.26
   5   4  -2    1.92    0.91
   5   1   2    3.58    1.30
   5   4  -3   38.81    2.52
   5   4  -3   29.40    1.90
   5   1   3   -0.31    0.37
   5   4  -4    3.41    1.27
   5   4  -4   -0.16    0.43
   5   1   4    3.49    1.32
   5   4  -5  102.71    3.39
   5   4  -5   80.32    2.92
   5   1   5  104.53    3.63
  -5  -1  -6  136.22    3.81
   5   4  -6  365.77    5.68
   5   4  -6  323.82    5.56
   5   1   6  372.69    6.31
  -5  -1  -7   33.09    2.31
   5   4  -7   78.77    3.09
   5   4  -7   72.23    3.13
   5   1   7   77.56    3.50
  -5  -1  -8  166.34    4.43
  -5  -1  -8  338.23    5.01
   5   4  -8  341.27    5.53
   5   4  -8  312.01    5.90
   5   1   8  360.89    6.42
  -5  -1  -9  103.01    3.74
  -5  -1  -9  187.52    3.97
   5   4  -9  185.43    4.22
   5   4  -9  179.02    4.76
   5   1   9  202.50    5.12
  -5  -1 -10  115.03    4.05
  -5  -1 -10  186.99    3.90
   5   4 -10  184.80    4.21
   5   4 -10  181.84    5.00
   5   1  10  214.69    5.33
  -5  -1 -11  134.82    4.52
  -5  -1 -11   -0.10    0.48
   5   4 -11  193.06    4.33
   5   4 -11  211.92    5.57
   5   1  11  246.41    5.75
  -5  -1 -12    7.61    1.73
  -5  -1 -12   -0.22    0.69
   5   4 -12   11.53    1.68
   5   4 -12   21.00    2.59
   5   1  12   16.51    2.36
  -5  -1 -13    4.44    1.61
  -5  -1 -13    8.89    1.58
   5   4 -13    5.30    1.38
   5   4 -13    9.32    2.08
   5   1  13    7.82    2.12
  -5  -1 -14   77.86    4.07
   5   4 -14   72.83    3.01
   5   4 -14  112.81    4.96
   5   1  14  132.27    4.85
  -5  -1 -15   10.28    2.22
   5   4 -15   13.35    2.45
   5   1  15   17.94    2.61
  -5  -1 -16   11.38    2.28
   5   4 -16   20.82    2.96
   5   1  16   21.26    2.83
  -5  -1 -17   26.51    3.29
   5   4 -17   38.12    3.86
   5   1  17   47.09    3.85
  -5  -1 -18    5.24    2.03
   5   4 -18   11.36    2.67
  -5  -1 -19    3.48    1.90
   5   4 -19    6.63    2.37
  -5  -1 -20    1.02    1.82
   5   4 -20    3.11    2.14
  -5  -1 -21   15.12    2.84
   5   4 -21   25.32    3.57
  -5  -1 -22    0.03    1.77
   5   4 -22    2.47    2.23
  -5  -1 -23    0.45    1.94
   5   4 -23   -0.06    2.04
  -5  -1 -24    1.16    2.07
   5   4 -24    1.38    2.22
  -5  -1 -25   -1.28    1.95
   5   4 -25    0.65    2.21
  -5  -1 -26   31.18    4.33
   5   4 -26   39.03    4.61
  -5  -1 -27    1.22    2.35
   5   4 -27    3.71    2.67
  -5  -1 -28    5.83    2.82
   5   4 -28    5.48    2.92
  -5  -1 -29   10.97    3.37
   5   4 -29   19.18    4.10
  -7  -5 -27   23.82    3.94
   7   2 -27   42.10    5.34
  -7  -5 -26    8.46    2.80
   7   2 -26   20.57    4.01
  -7  -5 -25    6.49    2.53
   7   2 -25   13.08    3.48
  -7  -5 -24    1.02    1.91
   7   2 -24    1.54    2.44
  -7  -5 -23    1.70    1.96
   7   2 -23    1.99    2.38
  -7  -5 -22   23.38    3.37
   7   2 -22   46.98    4.73
  -7  -5 -21    1.51    1.84
   7   2 -21    1.71    2.25
  -7  -5 -20    4.74    2.07
   7   2 -20   13.85    3.15
  -7  -5 -19   10.92    2.38
   7   2 -19   21.00    3.36
  -7  -5 -18   82.95    4.54
   7   2 -18  195.45    7.26
  -7  -5 -17   90.72    4.58
   7   2 -17  194.12    7.04
   7   5  16   44.05    3.92
  -7  -5 -16   20.50    2.81
  -7  -5 -16   39.24    3.75
   7   2 -16   37.44    4.03
   7   5  15  212.85    6.35
  -7  -5 -15   69.80    3.97
  -7  -5 -15  169.18    5.71
   7   2 -15  175.37    6.56
   7   5  14  114.51    5.09
  -7  -5 -14   40.65    3.25
  -7  -5 -14   99.24    4.78
   7   2 -14  104.16    5.29
   7   5  13   49.09    3.95
  -7  -5 -13   15.92    2.31
  -7  -5 -13   41.15    3.77
   7   2 -13   40.74    3.85
   7   5  12   -0.21    1.97
  -7  -5 -12    0.25    1.25
  -7  -5 -12    0.94    1.78
   7   2 -12    0.39    1.73
   7   5  11   14.14    2.61
  -7  -5 -11    2.82    1.38
  -7  -5 -11   10.12    2.14
   7   2 -11   13.44    2.01
   7   2 -11   12.20    2.38
   7   5  10   34.30    3.49
  -7  -5 -10    8.48    1.68
  -7  -5 -10   34.38    3.36
   7   2 -10   36.69    2.95
   7   2 -10   34.32    3.40
   7   5   9   -0.57    1.84
  -7  -5  -9    1.12    1.08
  -7  -5  -9   -0.94    1.50
   7   2  -9    0.69    1.52
   7   2  -9    0.49    1.54
   7   5   8   18.42    2.62
  -7  -5  -8   14.38    2.13
   7   2  -8   18.65    2.28
   7   2  -8   15.85    2.25
   7   5   7  181.81    5.42
  -7  -5  -7  160.38    4.91
   7   2  -7  187.14    4.89
   7   2  -7  149.32    4.98
   7   5   6  514.54    8.40
   7   2  -6  485.92    7.42
   7   2  -6  387.31    7.29
   7   5   5  261.64    6.13
   7   2  -5  261.22    5.71
   7   2  -5  195.37    5.29
   7   5   4  225.30    5.77
   7   2  -4  223.11    5.35
   7   2  -4  152.30    4.80
   7   5   3   27.73    2.91
   7   2  -3   25.92    2.79
   7   5   2   -0.08    0.39
   7   2  -2   11.96    2.05
   7   5   1   16.65    2.24
   7   2  -1   21.08    2.44
   7   5   0   76.57    3.83
   7   2   0   74.00    3.75
   7   5  -1    2.29    1.68
   7   2   1    2.20    1.68
   7   5  -2   22.81    2.80
   7   2   2   20.66    2.47
   7   5  -3    6.90    1.84
   7   5  -3    6.73    1.46
   7   2   3   -0.61    0.65
   7   5  -4   66.25    3.50
   7   5  -4   53.75    2.99
   7   2   4   64.79    3.53
   7   5  -5    6.25    1.82
   7   5  -5    4.06    1.39
   7   2   5    5.60    1.94
   7   5  -6   15.11    2.16
   7   5  -6   16.25    2.05
   7   2   6   17.47    2.48
   7   5  -7    0.98    1.51
   7   5  -7   -0.19    1.24
   7   2   7    2.37    1.88
   7   5  -8   83.86    3.77
   7   5  -8   75.39    3.84
   7   2   8   87.24    4.35
  -7  -2  -9    0.20    1.20
   7   5  -9    0.50    1.49
   7   5  -9    2.47    1.51
   7   2   9   -1.04    1.85
  -7  -2 -10    0.58    1.28
   7   5 -10    1.67    1.55
   7   5 -10    1.16    1.56
   7   2  10    1.06    2.00
  -7  -2 -11    0.09    1.32
   7   5 -11    0.09    1.48
   7   5 -11    1.36    1.61
   7   2  11    1.28    2.05
  -7  -2 -12    2.14    1.51
   7   5 -12    3.37    1.64
   7   5 -12    4.06    1.90
   7   2  12    2.83    2.18
  -7  -2 -13   -0.54    1.41
   7   5 -13    2.25    1.61
   7   5 -13    3.87    1.96
   7   2  13    1.20    2.23
  -7  -2 -14   12.50    2.33
   7   5 -14   32.58    3.73
   7   2  14   35.39    3.97
  -7  -2 -15    0.66    1.51
   7   5 -15    1.70    1.89
   7   2  15    1.70    2.26
  -7  -2 -16   82.90    4.59
   7   5 -16  161.43    6.31
   7   2  16  181.96    6.25
  -7  -2 -17    0.15    1.57
   7   5 -17    2.11    1.96
   7   2  17    2.54    2.28
  -7  -2 -18    2.13    1.78
   7   5 -18    3.95    2.25
   7   2  18    3.51    2.42
  -7  -2 -19    3.46    1.98
   7   5 -19   10.81    2.73
  -7  -2 -20   -0.48    1.66
   7   5 -20    0.32    2.10
  -7  -2 -21    0.95    1.80
   7   5 -21   -0.25    2.08
  -7  -2 -22    5.14    2.29
   7   5 -22   10.90    3.06
  -7  -2 -23   17.97    3.22
   7   5 -23   35.02    4.39
  -7  -2 -24   -0.54    1.97
   7   5 -24    1.75    2.46
  -7  -2 -25    9.54    2.87
   7   5 -25   15.06    3.57
  -7  -2 -26   -0.09    2.11
   7   5 -26   -0.73    2.43
  -7  -2 -27    2.33    2.41
   7   5 -27    2.98    2.77
  -9  -6 -25    0.41    2.05
   9   3 -25    0.85    2.71
  -9  -6 -24   -1.07    1.73
   9   3 -24    2.47    2.83
  -9  -6 -23   15.52    3.04
   9   3 -23   41.11    4.95
  -9  -6 -22    2.59    1.95
   9   3 -22    3.82    2.80
  -9  -6 -21    2.30    1.81
   9   3 -21   10.96    3.15
  -9  -6 -20   11.11    2.59
   9   3 -20   26.70    3.99
  -9  -6 -19   13.81    2.62
   9   3 -19   35.05    4.35
  -9  -6 -18   20.35    3.01
   9   3 -18   63.17    5.08
   9   6  17    0.55    2.37
  -9  -6 -17    1.53    1.59
   9   3 -17    1.79    2.26
   9   6  16   15.53    3.09
  -9  -6 -16    4.24    1.83
   9   3 -16   14.26    3.09
   9   6  15   18.64    3.25
  -9  -6 -15    4.74    1.78
  -9  -6 -15   15.01    2.71
   9   3 -15   17.42    3.10
   9   6  14   11.88    2.82
  -9  -6 -14    4.09    1.69
  -9  -6 -14   12.50    2.57
   9   3 -14    9.31    2.62
   9   6  13   -2.06    2.11
  -9  -6 -13   -0.84    1.19
  -9  -6 -13   -0.07    2.02
   9   3 -13    0.09    1.90
   9   6  12    2.24    2.39
   9   3 -12    4.32    2.22
   9   6  11   68.90    4.67
   9   3 -11   69.36    4.01
   9   3 -11   61.61    4.54
   9   6  10   44.86    4.21
   9   3 -10   39.99    3.58
   9   3 -10   37.60    4.01
   9   6   9    2.38    2.42
   9   3  -9    1.29    2.02
   9   3  -9    2.92    2.03
   9   6   8    5.78    2.57
   9   3  -8    4.66    2.19
   9   3  -8    5.96    2.20
   9   6   7  195.68    6.51
   9   3  -7  188.16    5.85
   9   3  -7  157.51    5.84
   9   6   6    5.67    2.45
   9   3  -6    5.07    2.24
   9   3  -6    3.84    1.91
   9   6   5   13.41    2.84
   9   3  -5   17.12    2.76
   9   3  -5   13.67    2.47
   9   6   4   59.25    4.02
   9   3  -4   75.17    4.37
   9   3  -4   48.02    3.79
   9   6   3    0.10    0.70
   9   3  -3  562.07    9.48
   9   6   2   -0.22    0.57
   9   3  -2  280.22    7.07
   9   6   1   -0.21    0.76
   9   3  -1   79.23    4.48
   9   6   0    2.97    2.20
   9   3   0    2.60    2.21
   9   6  -1    7.92    2.41
   9   3   1    6.32    2.41
   9   6  -2   52.26    4.05
   9   6  -2   43.17    3.42
   9   3   2   32.63    3.40
   9   6  -3    2.44    2.18
   9   6  -3    3.60    1.67
   9   3   3   -0.29    0.70
   9   6  -4   19.46    2.92
   9   6  -4   18.32    2.45
   9   3   4   -0.40    0.66
   9   6  -5   38.85    3.66
   9   6  -5   37.65    3.27
   9   3   5    0.52    1.13
   9   6  -6   24.81    3.02
   9   6  -6   25.31    2.87
   9   3   6   25.14    3.36
   9   6  -7    9.01    2.43
   9   6  -7   12.62    2.33
   9   3   7    9.74    2.81
   9   6  -8   24.12    3.02
   9   6  -8   23.27    2.95
   9   3   8   26.83    3.55
   9   6  -9  288.46    7.03
   9   6  -9  259.24    7.03
   9   3   9  295.64    7.93
   9   6 -10   63.21    4.09
   9   6 -10   54.68    4.24
   9   3  10   63.26    4.77
   9   6 -11   17.07    2.67
   9   6 -11   17.55    2.92
   9   3  11   19.73    3.35
   9   6 -12   11.92    2.38
   9   6 -12    8.99    2.47
   9   3  12   11.49    2.98
  -9  -3 -13    3.34    1.72
   9   6 -13    9.21    2.49
   9   3  13    7.94    2.78
  -9  -3 -14   11.97    2.35
   9   6 -14   41.96    3.98
   9   3  14   46.89    4.36
  -9  -3 -15    1.93    1.66
   9   6 -15    4.76    2.26
   9   3  15    4.33    2.66
  -9  -3 -16    0.90    1.58
   9   6 -16    1.16    2.12
   9   3  16    1.09    2.52
  -9  -3 -17    1.16    1.71
   9   6 -17    6.36    2.53
   9   3  17    4.09    2.77
  -9  -3 -18    4.45    2.02
   9   6 -18   13.31    3.04
   9   3  18   12.87    3.28
  -9  -3 -19    4.40    2.14
   9   6 -19    7.52    2.70
  -9  -3 -20    3.13    2.00
   9   6 -20    5.73    2.75
  -9  -3 -21    0.78    1.80
   9   6 -21    5.06    2.76
  -9  -3 -22    3.54    2.21
   9   6 -22   -0.09    2.39
  -9  -3 -23   12.51    2.96
   9   6 -23   29.16    4.44
  -9  -3 -24    2.17    2.21
   9   6 -24   -0.27    2.51
  -9  -3 -25    2.12    2.41
   9   6 -25    9.63    3.38
  11   4 -23   19.78    4.23
  11   4 -22    1.05    2.77
  11   4 -21    0.66    2.75
  11   4 -20    0.20    2.57
  11   4 -19    1.38    2.56
  11   4 -18    1.60    2.58
  11   7  17  193.35    7.47
  11   4 -17  189.18    7.90
  11   7  16   19.57    3.66
  11   4 -16   18.58    3.50
  11   7  15   48.21    4.63
  11   4 -15   43.51    4.55
  11   7  14    0.58    2.55
  11   4 -14    1.30    2.29
  11   7  13    1.05    2.62
  11   4 -13    1.45    2.23
  11   7  12   10.19    3.09
  11   4 -12   10.38    2.80
  11   7  11   -0.11    2.38
  11   4 -11   -1.23    1.94
  11   7  10    7.37    2.79
  11   4 -10    7.89    2.49
  11   4 -10    7.71    2.52
  11   7   9   -0.25    2.46
  11   4  -9    1.33    2.09
  11   4  -9    1.16    1.96
  11   7   8    8.77    2.93
  11   4  -8    9.14    2.63
  11   4  -8    5.14    2.24
  11   7   7   15.42    3.17
  11   4  -7   16.76    2.93
  11   4  -7   14.07    2.72
  11   7   6   73.24    4.99
  11   4  -6   74.94    4.79
  11   4  -6   58.56    4.35
  11   7   5   19.28    3.42
  11   4  -5   21.66    3.27
  11   4  -5   16.87    2.92
  11   7   4  176.74    6.75
  11   4  -4  166.65    6.32
  11   4  -4  128.62    5.62
  11   7   3   -1.20    2.33
  11   4  -3    3.46    2.57
  11   7   2   65.75    4.89
  11   4  -2   65.80    4.77
  11   7   1   60.80    4.78
  11   4  -1   67.47    4.79
  11   7   0   39.59    4.19
  11   4   0   35.43    4.20
  11   7  -1    8.93    2.90
  11   4   1    9.79    2.98
  11   7  -2    7.74    2.82
  11   7  -2    6.98    2.23
  11   4   2    6.78    2.86
  11   7  -3   16.74    3.17
  11   7  -3   12.52    2.52
  11   4   3   16.96    3.28
  11   7  -4    1.40    2.36
  11   7  -4    1.01    1.81
  11   4   4    2.20    2.44
  11   7  -5   23.58    3.36
  11   7  -5   20.73    2.93
  11   4   5   22.54    3.52
  11   7  -6    6.38    2.53
  11   7  -6    9.71    2.45
  11   4   6    8.16    2.86
  11   7  -7   20.71    3.12
  11   7  -7   19.06    2.96
  11   4   7   20.07    3.45
  11   7  -8    4.46    2.37
  11   7  -8    3.25    2.10
  11   4   8    4.57    2.72
  11   7  -9   12.59    2.80
  11   7  -9   14.37    2.76
  11   4   9   13.49    3.18
  11   7 -10    2.47    2.18
  11   7 -10    0.34    1.93
  11   4  10    1.46    2.63
  11   7 -11   -0.55    1.91
  11   7 -11    1.73    2.04
  11   4  11    0.06    2.50
  11   7 -12    1.79    2.09
  11   7 -12   -0.72    1.95
  11   4  12   -0.06    2.48
  11   7 -13   21.64    3.40
  11   4  13   16.54    3.54
  11   7 -14   27.69    3.83
  11   4  14   25.20    4.00
  11   7 -15   35.96    4.34
  11   4  15   35.34    4.36
  11   7 -16   69.84    5.28
  11   4  16   67.31    5.26
  11   7 -17    5.22    2.77
  11   4  17    4.40    2.97
  11   7 -18    0.73    2.41
  11   4  18    4.17    3.00
  11   7 -19    4.25    2.81
  11   7 -20    4.67    2.96
 -11  -4 -21    5.77    2.46
  11   7 -21   20.22    4.03
 -11  -4 -22    2.74    2.13
  11   7 -22    0.77    2.78
 -11  -4 -23   26.16    4.19
  11   7 -23   75.85    6.27
  13   5 -19   23.44    4.43
  13   5 -18    2.93    3.03
  13   8  17   51.01    5.25
  13   5 -17   48.80    5.33
  13   8  16   32.94    4.72
  13   5 -16   26.92    4.40
  13   8  15   40.57    4.82
  13   5 -15   35.13    4.66
  13   8  14    0.06    2.78
  13   5 -14    0.44    2.50
  13   8  13   -0.04    2.81
  13   5 -13    1.46    2.50
  13   8  12    4.32    3.01
  13   5 -12    5.34    2.78
  13   8  11   56.08    5.09
  13   5 -11   45.80    4.77
  13   8  10   52.78    4.98
  13   5 -10   43.14    4.68
  13   8   9   38.59    4.58
  13   5  -9   35.63    4.16
  13   5  -9   27.46    3.89
  13   8   8   44.95    4.70
  13   5  -8   45.70    4.43
  13   5  -8   40.91    4.44
  13   8   7   57.05    5.02
  13   5  -7   52.23    4.58
  13   5  -7   39.26    4.44
  13   8   6   54.17    4.90
  13   5  -6   52.65    4.64
  13   5  -6   42.76    4.46
  13   8   5   42.53    4.58
  13   5  -5   44.12    4.60
  13   5  -5   36.30    4.32
  13   8   4  215.69    7.95
  13   5  -4  214.71    7.74
  13   5  -4  163.46    6.79
  13   8   3  401.09   10.38
  13   5  -3  436.44   10.48
  13   5  -3  314.11    8.85
  13   8   2   26.51    3.94
  13   5  -2   23.94    3.85
  13   8   1   11.97    3.19
  13   5  -1   13.63    3.27
  13   8   0   12.88    3.19
  13   5   0   10.92    3.18
  13   8  -1   11.73    3.09
  13   8  -1    9.51    2.65
  13   5   1    7.91    3.04
  13   8  -2    4.59    2.73
  13   8  -2    2.13    2.08
  13   5   2    1.57    2.74
  13   8  -3   51.94    4.64
  13   8  -3   43.68    4.15
  13   5   3   46.18    4.61
  13   8  -4   28.38    3.97
  13   8  -4   24.96    3.45
  13   5   4   30.13    4.17
  13   8  -5    3.77    2.65
  13   8  -5    3.96    2.23
  13   5   5    2.42    2.70
  13   8  -6    0.82    2.41
  13   8  -6    0.45    2.07
  13   5   6    1.05    2.63
  13   8  -7   -0.75    2.34
  13   8  -7    0.42    2.04
  13   5   7   -1.20    2.52
  13   8  -8    2.42    2.48
  13   8  -8    1.20    2.18
  13   5   8    0.68    2.73
  13   8  -9  125.51    6.18
  13   8  -9  123.41    6.12
  13   5   9  127.44    6.70
  13   8 -10   47.36    4.50
  13   8 -10   44.87    4.59
  13   5  10   44.25    4.85
  13   8 -11    2.69    2.44
  13   8 -11    1.25    2.35
  13   5  11    2.52    2.91
  13   8 -12   51.74    4.89
  13   5  12   60.09    5.32
  13   8 -13    0.99    2.47
  13   5  13    0.72    2.85
  13   8 -14    1.26    2.45
  13   5  14    2.03    2.94
  13   8 -15    6.16    2.87
  13   5  15    7.13    3.46
  13   8 -16   -1.97    2.34
  13   5  16    1.02    3.07
  13   8 -17   -0.52    2.59
  13   5  17   -0.18    3.09
  13   8 -18    2.82    2.95
  13   5  18    7.34    3.59
  13   8 -19   30.43    4.70
  15   6 -14    8.03    3.62
  15   6 -13    2.62    3.06
  15   6 -12    0.19    2.83
  15   6 -11   51.33    5.44
  15   9  10    5.42    3.38
  15   6 -10    6.20    3.10
  15   9   9   27.04    4.59
  15   6  -9   29.72    4.50
  15   9   8    4.57    3.22
  15   6  -8    9.02    3.15
  15   6  -8    4.10    2.83
  15   9   7   23.33    4.26
  15   6  -7   21.64    3.89
  15   6  -7   14.37    3.42
  15   9   6    0.25    2.86
  15   6  -6    2.49    2.79
  15   6  -6   -0.99    2.36
  15   9   5    7.02    3.23
  15   6  -5    5.67    3.09
  15   6  -5    6.10    2.90
  15   9   4   45.02    4.93
  15   6  -4   48.62    4.98
  15   6  -4   41.25    4.72
  15   9   3    0.56    2.77
  15   6  -3    2.35    2.88
  15   6  -3    0.26    2.36
  15   9   2   55.16    5.18
  15   6  -2   61.33    5.50
  15   6  -2   40.09    4.59
  15   9   1    7.56    3.26
  15   6  -1    8.10    3.38
  15   6  -1    5.43    2.81
  15   9   0    2.84    2.86
  15   6   0    2.55    2.97
  15   9  -1   57.52    5.21
  15   6   1   51.95    5.21
  15   9  -2   12.69    3.52
  15   6   2   12.88    3.63
  15   9  -3   20.78    3.88
  15   6   3   23.46    4.27
  15   9  -4    4.41    2.96
  15   6   4    0.76    2.94
  15   9  -5   10.25    3.22
  15   6   5    8.54    3.38
  15   9  -6    7.17    3.11
  15   6   6    7.98    3.39
  15   9  -7    4.63    2.85
  15   6   7    3.08    3.14
  15   9  -8   22.77    3.93
  15   6   8   22.37    4.35
  15   9  -9   30.66    4.37
  15   6   9   23.13    4.40
  15   9 -12   -1.92    2.57
  15   9 -13    7.97    3.33
  15   9 -14    7.38    3.30
  17   7  -1    6.74    3.44
  17   7   0   23.57    4.41
   0  -2 -30    0.21    2.41
   0  -2 -29   -3.01    2.20
   0  -2 -28   25.40    3.97
   0  -2 -27   -1.46    1.97
   0  -2 -26   39.05    4.32
   0  -2 -25    2.37    2.18
   0  -2 -24   66.07    4.82
   0  -2 -23    0.18    1.91
   0  -2 -23   -0.36    1.96
   0  -2 -22   32.29    3.69
   0  -2 -22   15.04    2.72
   0  -2 -21    0.82    1.76
   0  -2 -21    1.82    1.87
   0  -2 -20  222.13    7.04
   0  -2 -20  120.79    5.32
   0  -2 -19    1.26    1.82
   0  -2 -19    1.34    1.89
   0  -2 -18   13.02    2.48
   0  -2 -18    7.97    2.18
   0  -2 -17   -0.56    1.49
   0  -2 -16  173.66    5.57
   0  -2 -15    0.60    1.34
   0  -2 -14   29.90    2.78
   0  -2 -13   -0.84    1.08
   0  -2 -12   19.78    2.24
   0  -2 -11    0.16    0.96
   0  -2 -10    2.53    1.08
   0  -2  -9    0.47    0.87
   0  -2  -8    0.96    0.84
   0  -2  -7    0.50    0.78
   0  -2  -6    3.25    0.90
   0  -2  -5    0.64    0.74
   0   2   4  420.75    2.35
   0  -2  -4  518.22    4.26
   0   2   3   -0.30    0.37
   0   2   2   22.71    0.84
   0   2   1    0.05    0.33
   0   2   0  226.36    2.29
   0   2  -1    0.03    0.21
   0   2  -2   62.26    1.50
   0   2  -3    0.49    0.56
   0   2  -4    0.43    0.68
   0   2  -4    0.63    0.59
   0   2  -5   -0.87    0.73
   0   2  -5   -0.50    0.67
   0   2  -6  225.22    3.30
   0   2  -6  311.83    4.37
   0   2  -7   -0.01    0.73
   0   2  -7    0.04    0.29
   0   2  -8    3.17    0.86
   0   2  -8   -0.07    0.28
   0   2  -9    1.58    0.79
   0   2  -9    0.38    0.56
   0   2 -10  219.67    3.71
   0   2 -10  218.87    4.75
   0   2 -11   -0.22    0.79
   0   2 -11    0.65    0.97
   0   2 -12  299.86    4.53
   0   2 -12  283.97    5.89
   0   2 -13    0.85    0.90
   0   2 -13    0.41    1.01
   0   2 -14   20.60    1.94
   0   2 -14   18.00    2.06
   0   2 -15   -0.51    1.02
   0   2 -15    0.40    0.42
   0   2 -16    0.17    0.43
   0   2 -17    0.07    0.54
   0   2 -18  494.22    9.73
   0   2 -19    2.33    1.81
   0   2 -20  323.73    8.50
   0   2 -21   -0.01    1.60
   0   2 -22   23.25    3.20
   0   2 -23    0.58    1.82
   0   2 -24    8.70    2.58
   0   2 -25    1.20    2.09
   0   2 -26   54.17    4.84
   0   2 -27    3.82    2.42
   0   2 -28    8.72    2.90
   0   2 -29    0.86    2.40
   0   2 -30    0.65    2.46
  -2  -3 -30    0.94    2.48
   2  -1 -30    0.34    2.55
  -2  -3 -29   10.11    3.15
   2  -1 -29    9.75    3.26
  -2  -3 -28    2.39    2.33
   2  -1 -28    0.92    2.40
  -2  -3 -27    0.55    2.12
   2  -1 -27    2.81    2.45
  -2  -3 -26    8.06    2.68
   2  -1 -26    9.63    2.92
  -2  -3 -25    3.63    2.23
   2  -1 -25    3.70    2.32
  -2  -3 -24   -0.41    1.87
   2  -1 -24    1.69    2.04
  -2  -3 -23    1.19    1.98
   2  -1 -23    1.05    2.03
  -2  -3 -22   41.71    3.97
   2  -1 -22   45.00    4.17
  -2  -3 -21   32.75    3.56
  -2  -3 -21    9.24    2.35
   2  -1 -21   32.11    3.68
  -2  -3 -20   19.81    2.90
  -2  -3 -20    6.42    2.19
   2  -1 -20   23.64    3.25
  -2  -3 -19   13.76    2.51
  -2  -3 -19    4.57    2.04
   2  -1 -19   18.22    2.90
  -2  -3 -18   78.51    4.42
  -2  -3 -18   23.96    2.87
   2  -1 -18   84.99    4.76
  -2  -3 -17    2.27    1.72
  -2  -3 -17    0.11    1.56
   2  -1 -17    3.58    1.89
  -2  -3 -16   38.95    3.32
  -2  -3 -16   13.80    2.17
   2  -1 -16   49.90    3.65
  -2  -3 -15   -0.19    1.26
  -2  -3 -15    0.48    1.31
   2  -1 -15   -0.08    1.47
   2   3  14   56.89    2.40
  -2  -3 -14   38.31    2.89
  -2  -3 -14   11.83    1.83
   2  -1 -14   45.74    3.23
   2   3  13   -0.41    0.98
  -2  -3 -13    0.81    1.13
  -2  -3 -13   -0.22    1.09
   2  -1 -13   -0.05    1.20
   2   3  12    0.90    1.00
  -2  -3 -12    0.59    1.04
  -2  -3 -12    1.78    1.14
   2  -1 -12    0.58    1.17
   2   3  11    5.85    1.16
  -2  -3 -11    3.67    1.16
  -2  -3 -11    1.21    1.07
   2  -1 -11    4.66    1.40
   2   3  10   27.56    1.89
  -2  -3 -10   17.18    1.98
  -2  -3 -10    4.31    1.20
   2  -1 -10   20.98    2.23
   2   3   9   43.00    1.98
  -2  -3  -9   30.85    2.07
  -2  -3  -9   -0.32    0.56
   2  -1  -9   33.37    2.40
   2   3   8  613.70    5.35
  -2  -3  -8  400.81    5.34
  -2  -3  -8  124.94    3.23
   2  -1  -8  489.85    6.44
   2   3   7   30.18    1.83
  -2  -3  -7   18.55    1.62
  -2  -3  -7    8.19    1.20
   2  -1  -7   26.57    2.08
   2   3   6 2923.40   15.00
  -2  -3  -6 1848.21    9.59
  -2  -3  -6  950.91    7.66
   2  -1  -6 2803.47   12.52
   2  -1  -6 2280.27   12.23
   2   3   5  236.24    3.43
  -2  -3  -5  153.52    2.75
  -2  -3  -5  102.76    2.91
   2  -1  -5  234.44    2.55
   2  -1  -5  192.29    3.67
   2   3   4   12.65    1.30
  -2  -3  -4    7.98    0.86
  -2  -3  -4    6.40    1.10
   2  -1  -4   14.57    1.41
   2  -1  -4   11.88    1.27
   2   3   3  105.73    2.55
  -2  -3  -3   68.24    2.28
   2  -1  -3  111.43    2.18
   2  -1  -3   81.11    2.32
   2   3   2  700.90    5.36
  -2  -3  -2   -0.06    0.13
   2  -1  -2  735.35    4.90
   2   3   1   19.37    1.40
  -2  -3  -1    0.50    0.42
   2  -1  -1   18.92    1.39
   2   3   0    0.19    0.13
  -2  -3   0   19.74    1.50
   2  -1   0   25.01    1.59
   2   3  -1    1.73    0.80
   2  -1   1    1.94    0.85
  -2   1  -2    0.05    0.07
   2   3  -2    1.02    0.86
   2  -1   2    0.14    0.14
  -2   1  -3    0.11    0.09
   2   3  -3    8.89    1.16
   2   3  -3    7.33    0.90
   2  -1   3    8.17    1.22
  -2   1  -4  194.05    3.40
  -2   1  -4    0.14    0.12
   2   3  -4  168.58    3.10
   2   3  -4  179.71    3.07
  -2   1  -5    3.30    1.01
  -2   1  -5   -0.06    0.17
   2   3  -5    2.32    0.91
   2   3  -5    2.97    0.90
  -2   1  -6 1297.63    8.68
  -2   1  -6    0.28    0.38
   2   3  -6  873.98    6.57
   2   3  -6 1180.99    8.50
  -2   1  -7  149.24    3.34
   2   3  -7   81.04    2.33
   2   3  -7  131.20    3.25
  -2   1  -8   32.26    2.03
   2   3  -8   18.50    1.53
   2   3  -8   22.62    1.86
  -2   1  -9   33.96    2.18
  -2   1  -9   26.98    1.57
   2   3  -9   12.79    1.46
   2   3  -9   43.70    2.52
   2  -1   9   48.52    2.43
  -2   1 -10  389.11    6.39
  -2   1 -10  224.80    3.40
   2   3 -10  109.28    2.78
   2   3 -10  448.64    6.76
   2  -1  10  468.44    5.92
  -2   1 -11  217.52    5.13
  -2   1 -11  108.09    2.72
   2   3 -11   68.58    2.38
   2   3 -11  249.53    5.41
   2  -1  11   -0.05    0.55
  -2   1 -12   94.67    3.72
  -2   1 -12   46.31    2.19
   2   3 -12   44.17    2.09
   2   3 -12  108.43    3.96
  -2   1 -13    9.91    1.73
  -2   1 -13    3.09    0.98
   2   3 -13    6.45    1.13
   2   3 -13   11.53    1.83
   2  -1  13   13.21    1.78
  -2   1 -14  152.91    4.99
  -2   1 -14   60.07    2.52
   2   3 -14  121.59    3.18
   2   3 -14  173.95    5.27
   2  -1  14  212.54    4.75
  -2   1 -15    0.11    0.64
  -2   1 -15   -0.34    0.48
   2   3 -15    3.07    1.08
   2   3 -15    2.52    1.55
   2  -1  15    1.79    1.55
  -2   1 -16    0.02    1.05
   2   3 -16   34.00    3.28
   2  -1  16   33.23    2.95
  -2   1 -17    0.93    1.62
   2   3 -17    1.12    1.61
  -2   1 -18    7.93    2.20
   2   3 -18    8.66    2.30
  -2   1 -19    7.23    2.23
   2   3 -19    5.33    2.13
  -2   1 -20   27.99    3.41
   2   3 -20   35.29    3.67
  -2   1 -21    2.79    1.85
   2   3 -21    2.76    2.06
  -2   1 -22   63.10    4.56
   2   3 -22   66.32    4.71
  -2   1 -23   52.65    4.42
   2   3 -23   56.51    4.63
  -2   1 -24   67.16    4.91
   2   3 -24   70.18    5.06
  -2   1 -25   11.47    2.88
   2   3 -25   14.86    3.13
  -2   1 -26   58.69    4.97
   2   3 -26   71.06    5.34
  -2   1 -27    8.49    2.82
   2   3 -27   10.57    3.03
  -2   1 -28   19.10    3.67
   2   3 -28   16.65    3.53
  -2   1 -29    4.20    2.70
   2   3 -29    4.65    2.72
  -2   1 -30    3.91    2.77
   2   3 -30    2.11    2.70
  -4  -4 -29    1.06    2.45
   4   0 -29    6.00    3.00
  -4  -4 -28    7.62    2.77
   4   0 -28    7.65    3.13
  -4  -4 -27    2.07    2.26
   4   0 -27    2.86    2.61
  -4  -4 -26   12.27    3.00
   4   0 -26   18.85    3.57
  -4  -4 -25    1.24    2.01
   4   0 -25    3.59    2.45
  -4  -4 -24   44.84    4.22
   4   0 -24   49.79    4.65
  -4  -4 -23    4.84    2.24
   4   0 -23    2.47    2.24
  -4  -4 -22   23.66    3.35
   4   0 -22   30.56    3.88
  -4  -4 -21    3.38    1.94
   4   0 -21    4.35    2.30
  -4  -4 -20   77.58    4.54
  -4  -4 -20   61.86    4.23
   4   0 -20  113.14    5.65
  -4  -4 -19   11.65    2.42
  -4  -4 -19    8.72    2.27
   4   0 -19   17.49    2.94
  -4  -4 -18   25.84    3.12
  -4  -4 -18   23.43    2.88
   4   0 -18   37.79    3.82
  -4  -4 -17   56.57    3.79
  -4  -4 -17   42.82    3.81
   4   0 -17   81.35    4.72
  -4  -4 -16   -0.84    1.39
  -4  -4 -16   -0.16    1.60
   4   0 -16    0.81    1.71
   4   4  15  134.16    4.17
  -4  -4 -15   75.77    3.92
  -4  -4 -15   62.87    3.83
   4   0 -15    0.07    0.61
   4   4  14  129.91    4.09
  -4  -4 -14   72.21    3.72
  -4  -4 -14   60.80    3.67
   4   0 -14   -0.23    0.47
   4   4  13  119.10    3.85
  -4  -4 -13   64.47    3.36
  -4  -4 -13   61.12    3.50
   4   0 -13    0.14    0.48
   4   4  12   19.95    2.47
  -4  -4 -12    8.76    1.62
  -4  -4 -12   10.55    1.75
   4   0 -12   16.08    1.41
   4   0 -12   16.73    2.25
   4   4  11   31.62    2.55
  -4  -4 -11   18.29    2.07
  -4  -4 -11   21.16    2.51
   4   0 -11   26.61    1.63
   4   0 -11    4.98    1.33
   4   4  10   70.52    2.98
  -4  -4 -10   46.26    2.56
  -4  -4 -10   48.05    2.95
   4   0 -10   80.51    2.30
   4   0 -10    0.04    0.56
   4   4   9   -0.41    0.91
  -4  -4  -9    0.53    0.85
  -4  -4  -9   -0.37    1.04
   4   0  -9    0.98    0.89
   4   0  -9   -0.25    0.25
   4   4   8   -0.58    0.63
  -4  -4  -8    8.01    1.28
  -4  -4  -8   10.63    1.55
   4   0  -8   17.40    1.75
   4   0  -8   -0.23    0.18
   4   4   7   -0.10    0.56
  -4  -4  -7    6.96    1.09
  -4  -4  -7   10.57    1.47
   4   0  -7   14.86    1.74
   4   0  -7   -0.08    0.19
   4   4   6   -0.22    0.59
  -4  -4  -6    1.81    0.76
  -4  -4  -6    0.24    0.69
   4   0  -6    6.85    1.19
   4   0  -6   -0.09    0.22
   4   4   5    4.18    0.94
  -4  -4  -5    4.04    0.83
  -4  -4  -5   -0.09    0.46
   4   0  -5   15.12    1.76
   4   0  -5    0.02    0.25
  -4  -4  -4   28.21    1.52
  -4  -4  -4   21.88    1.63
   4   0  -4  112.87    2.96
   4   0  -4   -0.15    0.22
   4   0  -3  227.45    3.94
   4   4   2    0.64    0.48
  -4  -4  -2    0.04    0.39
   4   0  -2  200.10    3.85
   4   4   1   -0.01    0.22
   4   0  -1  598.05    6.36
   4   4   0  569.78    6.37
   4   0   0  606.96    6.54
   4   4  -1    1.19    1.14
   4   0   1    1.27    1.14
   4   4  -2   37.55    2.31
   4   4  -2   33.46    1.77
   4   0   2   33.60    2.17
   4   4  -3   36.87    2.28
   4   4  -3   34.32    1.85
   4   0   3   -0.23    0.30
  -4   0  -4    6.64    1.10
   4   4  -4   23.57    2.10
   4   4  -4   20.62    1.75
   4   0   4   -0.26    0.46
  -4   0  -5   65.13    2.58
   4   4  -5  171.93    3.81
   4   4  -5  153.43    3.51
   4   0   5  144.52    3.80
  -4   0  -6   55.09    2.50
   4   4  -6  119.38    3.29
   4   4  -6   -0.16    0.45
   4   0   6  117.70    3.57
  -4   0  -7    2.55    0.99
   4   4  -7    3.28    1.15
   4   4  -7    4.13    1.14
   4   0   7    4.08    1.43
  -4   0  -8    1.13    0.94
  -4   0  -8    1.44    0.85
   4   4  -8   -0.14    0.98
   4   4  -8    1.08    1.01
   4   0   8    0.77    1.29
  -4   0  -9    4.51    1.21
  -4   0  -9    7.58    1.13
   4   4  -9    7.84    1.35
   4   4  -9    8.12    1.54
   4   0   9    9.86    1.73
  -4   0 -10   32.12    2.47
  -4   0 -10   44.71    2.22
   4   4 -10   34.35    2.19
   4   4 -10   42.53    2.80
   4   0  10   46.76    2.95
  -4   0 -11   22.36    2.43
  -4   0 -11   32.86    2.13
   4   4 -11   23.76    2.00
   4   4 -11   32.50    2.72
   4   0  11   37.45    2.94
  -4   0 -12   62.31    3.44
  -4   0 -12   80.76    2.81
   4   4 -12   52.15    2.49
   4   4 -12   80.02    3.80
   4   0  12   87.30    3.77
  -4   0 -13   19.83    2.41
  -4   0 -13   22.85    2.13
   4   4 -13   10.80    1.52
   4   4 -13   24.29    2.89
   4   0  13   31.44    3.04
  -4   0 -14    7.63    1.86
   4   4 -14    3.36    1.22
   4   4 -14   12.16    2.20
   4   0  14   12.97    2.25
  -4   0 -15   54.64    3.68
   4   4 -15   81.69    4.34
   4   0  15   91.38    4.23
  -4   0 -16   16.20    2.54
   4   4 -16   23.52    2.95
   4   0  16   34.34    3.46
  -4   0 -17   43.75    3.72
   4   4 -17   52.65    4.10
   4   0  17   63.58    3.92
  -4   0 -18  199.61    6.64
   4   4 -18  254.59    7.50
  -4   0 -19    1.40    1.78
   4   4 -19   -0.11    1.67
   4   4 -20  275.59    8.14
  -4   0 -21   92.77    5.26
   4   4 -21  121.08    5.91
  -4   0 -22    0.39    1.84
   4   4 -22    0.31    1.93
  -4   0 -23    2.76    2.13
   4   4 -23    5.21    2.38
  -4   0 -24    1.49    2.11
   4   4 -24    0.67    2.11
  -4   0 -25    1.92    2.15
   4   4 -25    2.60    2.34
  -4   0 -26   26.24    3.90
   4   4 -26   37.27    4.52
  -4   0 -27    5.03    2.67
   4   4 -27    9.59    3.09
  -4   0 -28   16.98    3.69
   4   4 -28   16.59    3.67
  -4   0 -29    0.13    2.47
   4   4 -29    3.48    2.78
  -6  -5 -28    1.54    2.27
   6   1 -28    0.14    2.54
  -6  -5 -27    0.98    2.13
   6   1 -27    3.09    2.82
  -6  -5 -26    0.11    2.02
   6   1 -26    2.07    2.57
  -6  -5 -25    0.03    1.94
   6   1 -25   -0.82    2.20
  -6  -5 -24    5.80    2.40
   6   1 -24    9.01    2.90
  -6  -5 -23   20.22    3.25
   6   1 -23   33.13    4.35
  -6  -5 -22    3.23    2.08
   6   1 -22    8.24    2.65
  -6  -5 -21   22.94    3.32
   6   1 -21   39.90    4.23
  -6  -5 -20    0.90    1.67
   6   1 -20    0.20    1.89
  -6  -5 -19   19.27    2.79
   6   1 -19   37.82    3.96
  -6  -5 -18   -1.09    1.40
  -6  -5 -18    0.95    2.07
   6   1 -18   -0.35    1.74
  -6  -5 -17    6.74    1.98
  -6  -5 -17    9.71    2.29
   6   1 -17   13.59    2.76
   6   5  16   35.58    3.56
  -6  -5 -16   15.31    2.50
  -6  -5 -16   27.15    3.00
   6   1 -16   33.69    3.92
   6   5  15    6.53    2.25
  -6  -5 -15    3.62    1.67
  -6  -5 -15    3.96    1.95
   6   1 -15    4.68    2.08
   6   5  14   30.76    3.45
  -6  -5 -14   14.23    2.20
  -6  -5 -14   27.76    3.39
   6   1 -14   30.07    3.58
   6   5  13    9.58    2.31
  -6  -5 -13    2.37    1.44
  -6  -5 -13    6.79    2.05
   6   1 -13    5.35    1.70
   6   5  12    2.26    1.88
  -6  -5 -12    1.06    1.29
  -6  -5 -12    2.04    1.72
   6   1 -12   -0.36    0.67
   6   5  11   15.30    2.41
  -6  -5 -11    5.68    1.46
  -6  -5 -11    9.77    2.00
   6   1 -11   14.93    1.78
   6   1 -11   14.93    2.20
   6   5  10   27.13    3.08
  -6  -5 -10    7.85    1.54
  -6  -5 -10   25.54    2.95
   6   1 -10   25.86    2.42
   6   1 -10   24.99    3.06
   6   5   9  164.90    4.95
  -6  -5  -9   52.23    2.70
  -6  -5  -9  140.54    4.60
   6   1  -9  174.10    4.21
   6   1  -9  148.25    4.96
   6   5   8   46.34    3.24
  -6  -5  -8   12.47    1.65
  -6  -5  -8   37.86    3.02
   6   1  -8   48.17    2.80
   6   1  -8   37.19    2.96
   6   5   7    5.96    1.82
  -6  -5  -7    0.80    0.87
  -6  -5  -7    7.47    1.62
   6   1  -7    7.19    1.59
   6   1  -7    4.75    1.50
   6   5   6  548.11    7.99
  -6  -5  -6  469.40    7.27
   6   1  -6  561.12    7.19
   6   1  -6  423.64    7.20
   6   5   5 1066.30   10.86
  -6  -5  -5  934.50    9.96
   6   1  -5 1090.82    9.93
   6   1  -5  801.16    9.51
   6   5   4  115.05    4.08
   6   1  -4  120.31    3.88
   6   1  -4   81.71    3.48
   6   5   3  108.22    3.93
   6   1  -3  104.25    3.73
   6   5   2    7.66    1.70
   6   1  -2    7.57    1.71
   6   5   1   -0.13    0.48
   6   1  -1  205.28    4.88
   6   5   0    6.66    1.70
   6   1   0    6.45    1.69
   6   5  -1   34.31    2.71
   6   1   1   31.13    2.81
   6   5  -2   16.91    2.11
   6   5  -2    0.60    0.58
   6   1   2   16.46    2.14
   6   5  -3  125.88    4.06
   6   5  -3   95.44    3.16
   6   1   3    0.00    0.45
   6   5  -4    9.99    1.79
   6   5  -4    9.48    1.46
   6   1   4    9.86    1.89
   6   5  -5    0.17    1.29
   6   5  -5    0.70    1.02
   6   1   5    0.16    1.45
   6   5  -6  293.87    5.74
   6   5  -6  252.17    5.20
   6   1   6  301.49    6.29
  -6  -1  -7  381.42    6.80
   6   5  -7 1108.07   10.63
   6   5  -7  996.09   10.28
   6   1   7 1182.29   11.97
  -6  -1  -8  121.44    4.16
   6   5  -8  319.93    5.96
   6   5  -8  293.60    6.03
   6   1   8  335.24    6.76
  -6  -1  -9  120.57    4.25
   6   5  -9  261.09    5.47
   6   5  -9  255.31    5.83
   6   1   9  298.24    6.54
  -6  -1 -10   66.26    3.47
   6   5 -10  137.75    4.19
   6   5 -10  128.45    4.54
   6   1  10  152.22    5.08
  -6  -1 -11  406.96    7.84
   6   5 -11  752.59    8.90
   6   5 -11  748.23   10.33
   6   1  11  835.67   10.74
  -6  -1 -12   35.21    3.04
  -6  -1 -12   72.90    3.36
   6   5 -12   61.35    3.23
   6   5 -12   71.34    3.99
   6   1  12   70.54    4.08
  -6  -1 -13   69.76    3.94
   6   5 -13  105.31    3.84
   6   5 -13  123.36    5.06
   6   1  13  138.84    5.19
  -6  -1 -14   12.70    2.35
   6   5 -14   15.07    2.01
   6   5 -14   17.87    2.75
   6   1  14   21.94    3.00
  -6  -1 -15    6.82    2.01
   6   5 -15   14.12    2.60
   6   1  15   14.81    2.81
  -6  -1 -16    1.96    1.80
   6   5 -16    7.50    2.31
   6   1  16    7.61    2.53
  -6  -1 -17    0.11    1.58
   6   5 -17    1.70    1.92
   6   1  17    0.04    2.11
  -6  -1 -18    3.00    1.90
   6   5 -18    2.82    2.10
   6   1  18    4.10    2.29
  -6  -1 -19   10.74    2.52
   6   5 -19   21.82    3.34
  -6  -1 -20   -1.33    1.63
   6   5 -20   -0.17    1.95
  -6  -1 -21   10.02    2.60
   6   5 -21   18.75    3.28
  -6  -1 -22    5.89    2.35
   6   5 -22   10.49    2.90
  -6  -1 -23  100.25    5.77
   6   5 -23  159.59    7.21
  -6  -1 -24   28.35    3.95
   6   5 -24   44.34    4.71
  -6  -1 -25   28.19    4.00
   6   5 -25   46.58    4.88
  -6  -1 -26    0.58    2.25
   6   5 -26    4.53    2.78
  -6  -1 -27   12.69    3.23
   6   5 -27   17.95    3.82
  -6  -1 -28   16.17    3.66
   6   5 -28   28.16    4.49
  -8  -6 -26    0.81    2.22
   8   2 -26    1.73    2.90
  -8  -6 -25    2.28    2.18
   8   2 -25    1.22    2.75
  -8  -6 -24    5.89    2.31
   8   2 -24   16.29    3.72
  -8  -6 -23    5.21    2.21
   8   2 -23   13.75    3.54
  -8  -6 -22   32.54    3.66
   8   2 -22   80.88    5.73
  -8  -6 -21    9.30    2.40
   8   2 -21   23.07    3.82
  -8  -6 -20   22.76    3.14
   8   2 -20   56.99    4.90
  -8  -6 -19   32.66    3.42
   8   2 -19   83.45    5.52
  -8  -6 -18   11.37    2.43
   8   2 -18   27.27    3.74
  -8  -6 -17   54.93    3.81
   8   2 -17  150.79    6.58
   8   6  16  121.29    5.36
  -8  -6 -16   35.97    3.22
  -8  -6 -16  103.42    5.08
   8   2 -16  106.75    5.67
   8   6  15   69.24    4.49
  -8  -6 -15   19.17    2.65
  -8  -6 -15   61.33    4.30
   8   2 -15   68.08    4.75
   8   6  14   49.86    4.10
  -8  -6 -14   17.06    2.45
  -8  -6 -14   47.22    4.07
   8   2 -14   46.21    4.24
   8   6  13   67.89    4.50
  -8  -6 -13   18.74    2.53
  -8  -6 -13   54.90    4.25
   8   2 -13   56.40    4.37
   8   6  12    2.61    2.35
  -8  -6 -12   -0.88    1.19
  -8  -6 -12    2.06    2.07
   8   2 -12    0.77    1.97
   8   6  11    5.77    2.46
  -8  -6 -11    1.65    1.36
  -8  -6 -11    2.71    2.07
   8   2 -11    5.73    1.99
   8   2 -11    5.66    2.22
   8   6  10  104.99    5.06
  -8  -6 -10   96.88    4.67
   8   2 -10  107.84    4.30
   8   2 -10   85.78    4.69
   8   6   9    2.25    2.19
  -8  -6  -9    2.43    1.86
   8   2  -9    2.07    1.88
   8   2  -9    1.33    1.74
   8   6   8   89.78    4.71
   8   2  -8   87.78    4.16
   8   2  -8   72.07    4.23
   8   6   7    2.02    2.07
   8   2  -7    1.54    1.81
   8   2  -7    0.94    1.60
   8   6   6   -1.13    1.92
   8   2  -6    1.33    1.81
   8   2  -6    0.07    1.43
   8   6   5  114.77    4.85
   8   2  -5  107.42    4.43
   8   2  -5   81.87    4.14
   8   6   4   58.30    3.89
   8   2  -4   63.40    3.87
   8   2  -4   40.95    3.49
   8   6   3  219.82    5.99
   8   2  -3  228.71    5.95
   8   6   2   -0.07    0.42
   8   2  -2   97.07    4.35
   8   6   1  372.08    7.49
   8   2  -1  401.34    7.67
   8   6   0    3.37    1.98
   8   2   0    4.60    2.03
   8   6  -1   17.20    2.52
   8   2   1   15.03    2.55
   8   6  -2  111.39    4.60
   8   6  -2   98.98    3.96
   8   2   2  119.87    4.82
   8   6  -3    0.40    1.80
   8   6  -3    0.08    1.30
   8   2   3   -0.54    0.94
   8   6  -4   83.26    4.17
   8   6  -4   69.67    3.54
   8   2   4   -0.35    0.49
   8   6  -5  101.19    4.44
   8   6  -5   86.65    3.86
   8   2   5   23.41    2.38
   8   6  -6   42.95    3.43
   8   6  -6   35.51    3.10
   8   2   6   44.44    3.81
   8   6  -7    2.00    1.83
   8   6  -7    3.09    1.63
   8   2   7    3.51    2.25
   8   6  -8   20.50    2.62
   8   6  -8   20.09    2.61
   8   2   8   21.03    3.01
   8   6  -9   36.62    3.29
   8   6  -9   34.82    3.30
   8   2   9   40.01    4.03
   8   6 -10    4.70    1.91
   8   6 -10    3.87    1.83
   8   2  10    3.83    2.42
  -8  -2 -11   11.74    2.29
   8   6 -11   28.99    3.16
   8   6 -11   31.93    3.55
   8   2  11   31.22    3.61
  -8  -2 -12    3.88    1.78
   8   6 -12   12.83    2.33
   8   6 -12    9.87    2.38
   8   2  12   10.63    2.83
  -8  -2 -13    8.84    2.18
   8   6 -13   24.46    2.74
   8   6 -13   28.23    3.38
   8   2  13   30.21    3.66
  -8  -2 -14    7.58    2.09
   8   6 -14   15.35    2.76
   8   2  14   17.59    3.18
  -8  -2 -15    3.75    1.88
   8   6 -15   15.72    2.86
   8   2  15   11.66    2.83
  -8  -2 -16    4.83    1.93
   8   6 -16   10.27    2.61
   8   2  16   11.01    2.85
  -8  -2 -17    1.30    1.66
   8   6 -17    8.10    2.49
   8   2  17   10.80    2.86
  -8  -2 -18   10.11    2.45
   8   6 -18   26.88    3.65
   8   2  18   29.49    3.77
  -8  -2 -19    0.31    1.69
   8   6 -19    0.83    2.11
  -8  -2 -20    1.41    1.91
   8   6 -20   11.06    3.05
  -8  -2 -21   62.55    4.72
   8   6 -21  131.67    6.73
  -8  -2 -22    5.76    2.44
   8   6 -22    9.76    3.06
  -8  -2 -23    2.72    2.18
   8   6 -23    3.41    2.63
  -8  -2 -24    4.33    2.40
   8   6 -24    5.72    2.92
  -8  -2 -25    5.44    2.61
   8   6 -25   15.65    3.72
  -8  -2 -26    9.33    2.90
   8   6 -26   19.88    4.05
  10   3 -24    7.19    3.41
  10   3 -23   27.97    4.52
  10   3 -22    7.42    3.14
 -10  -7 -21   -1.16    1.60
  10   3 -21    2.99    2.83
 -10  -7 -20    2.71    1.80
  10   3 -20    2.26    2.53
 -10  -7 -19    4.85    2.00
  10   3 -19   15.31    3.55
 -10  -7 -18    5.73    2.05
  10   3 -18   22.11    3.79
  10   7  17    2.53    2.54
 -10  -7 -17    0.98    1.57
  10   3 -17    0.47    2.35
  10   7  16   14.46    3.24
 -10  -7 -16    5.21    1.90
  10   3 -16   14.81    3.25
  10   7  15   34.05    4.12
  10   3 -15   34.26    4.16
  10   7  14   68.26    4.89
  10   3 -14   71.26    5.11
  10   7  13   13.30    3.06
  10   3 -13   15.82    3.13
  10   7  12   13.81    3.04
  10   3 -12   15.29    3.03
  10   7  11    3.43    2.53
  10   3 -11    4.22    2.22
  10   7  10    2.21    2.46
  10   3 -10    2.61    2.08
  10   3 -10    4.19    2.22
  10   7   9   35.22    4.15
  10   3  -9   33.28    3.59
  10   3  -9   27.54    3.37
  10   7   8    0.82    2.41
  10   3  -8    2.22    2.23
  10   3  -8    0.18    1.89
  10   7   7   10.11    2.92
  10   3  -7   13.61    2.82
  10   3  -7    7.76    2.35
  10   7   6    3.40    2.69
  10   3  -6    9.05    2.61
  10   3  -6    5.54    2.20
  10   7   5  231.99    7.32
  10   3  -5  233.24    6.87
  10   3  -5  168.65    6.11
  10   7   4   58.64    4.62
  10   3  -4   56.36    4.29
  10   3  -4   41.12    4.13
  10   7   3   59.78    4.62
  10   3  -3   58.93    4.45
  10   7   2   23.56    3.38
  10   3  -2   26.13    3.48
  10   7   1   25.41    3.48
  10   3  -1   27.20    3.55
  10   7   0   19.16    3.11
  10   3   0   15.54    3.01
  10   7  -1    5.03    2.47
  10   3   1    3.67    2.53
  10   7  -2   -0.91    2.16
  10   7  -2   -0.38    1.63
  10   3   2    0.80    2.41
  10   7  -3   47.75    4.16
  10   7  -3   38.06    3.53
  10   3   3   45.91    4.31
  10   7  -4    6.77    2.56
  10   7  -4    6.07    2.08
  10   3   4    8.22    2.71
  10   7  -5   12.81    2.76
  10   7  -5    9.98    2.29
  10   3   5   11.35    2.97
  10   7  -6    4.13    2.31
  10   7  -6    2.27    1.93
  10   3   6    4.16    2.69
  10   7  -7  154.98    5.92
  10   7  -7  146.68    5.59
  10   3   7  164.51    6.60
  10   7  -8  265.15    7.23
  10   7  -8  258.67    7.13
  10   3   8  277.68    8.09
  10   7  -9   11.02    2.60
  10   7  -9   12.09    2.60
  10   3   9   11.23    3.01
  10   7 -10  496.41    9.49
  10   7 -10  475.70    9.65
  10   3  10  488.82   10.42
  10   7 -11  275.46    7.27
  10   7 -11  262.01    7.56
  10   3  11  280.56    8.22
  10   7 -12    4.11    2.06
  10   7 -12    3.21    2.06
  10   3  12    2.59    2.55
  10   7 -13   32.38    3.79
  10   3  13   30.94    3.97
  10   7 -14    4.23    2.22
  10   3  14    0.70    2.48
  10   7 -15   23.16    3.51
  10   3  15   18.36    3.59
  10   7 -16    2.91    2.35
  10   3  16    2.91    2.77
 -10  -3 -17    2.32    1.88
  10   7 -17    8.04    2.72
  10   3  17    6.88    3.04
 -10  -3 -18    5.86    2.22
  10   7 -18   14.29    3.23
  10   3  18   12.63    3.31
 -10  -3 -19    6.79    2.40
  10   7 -19   14.80    3.36
 -10  -3 -20    2.16    2.03
  10   7 -20   -2.00    2.19
 -10  -3 -21    6.17    2.47
  10   7 -21   14.29    3.53
 -10  -3 -22   27.02    4.02
  10   7 -22   66.99    5.77
 -10  -3 -23   27.99    4.16
  10   7 -23   69.76    6.01
 -10  -3 -24   -0.60    2.09
  10   7 -24    2.16    2.85
  12   4 -21   34.60    5.11
  12   4 -20    2.89    3.10
  12   4 -19   20.09    4.15
  12   4 -18   16.99    3.78
  12   8  17   15.81    3.65
  12   4 -17   19.01    3.84
  12   8  16  247.26    8.64
  12   4 -16  227.04    8.69
  12   8  15    6.34    3.08
  12   4 -15    5.47    2.88
  12   8  14   20.90    3.80
  12   4 -14   23.32    3.91
  12   8  13    4.02    2.87
  12   4 -13    0.59    2.34
  12   8  12    9.95    3.22
  12   4 -12    7.62    2.86
  12   8  11   16.54    3.53
  12   4 -11   14.33    3.15
  12   8  10   68.59    5.17
  12   4 -10   60.70    4.88
  12   8   9    2.20    2.68
  12   4  -9    1.29    2.26
  12   4  -9    0.64    2.15
  12   8   8   13.31    3.33
  12   4  -8   12.70    2.95
  12   4  -8   12.30    2.94
  12   8   7   -0.90    2.39
  12   4  -7    0.45    2.33
  12   4  -7    2.57    2.18
  12   8   6    3.92    2.71
  12   4  -6    7.65    2.68
  12   4  -6    1.67    2.07
  12   8   5   -0.40    2.42
  12   4  -5   -0.73    2.25
  12   4  -5    0.80    1.96
  12   8   4  125.08    6.11
  12   4  -4  129.77    5.99
  12   4  -4  105.54    5.53
  12   8   3   25.36    3.66
  12   4  -3   22.13    3.41
  12   4  -3   16.98    3.10
  12   8   2   31.90    3.92
  12   4  -2   33.13    4.10
  12   8   1   30.21    3.84
  12   4  -1   29.97    3.86
  12   8   0   60.75    4.68
  12   4   0   55.64    4.65
  12   8  -1   11.58    2.98
  12   8  -1    6.84    2.35
  12   4   1    9.10    3.02
  12   8  -2   72.69    4.91
  12   8  -2   60.29    4.25
  12   4   2   65.68    5.01
  12   8  -3   58.62    4.60
  12   8  -3   48.83    4.06
  12   4   3   54.67    4.73
  12   8  -4   85.07    5.17
  12   8  -4   86.41    4.83
  12   4   4   86.21    5.41
  12   8  -5    2.95    2.49
  12   8  -5    4.89    2.16
  12   4   5    5.93    2.77
  12   8  -6   26.25    3.53
  12   8  -6   26.34    3.39
  12   4   6   24.80    3.78
  12   8  -7    3.71    2.43
  12   8  -7   -0.09    1.97
  12   4   7    0.17    2.53
  12   8  -8   20.92    3.31
  12   8  -8   19.10    3.11
  12   4   8   19.28    3.68
  12   8  -9   17.97    3.22
  12   8  -9   17.58    3.09
  12   4   9   13.20    3.39
  12   8 -10    2.70    2.32
  12   8 -10    2.45    2.21
  12   4  10    0.05    2.66
  12   8 -11   25.09    3.55
  12   8 -11   23.32    3.48
  12   4  11   22.58    3.90
  12   8 -12   63.36    4.90
  12   4  12   58.42    5.11
  12   8 -13    2.44    2.33
  12   4  13    4.15    2.97
  12   8 -14    5.02    2.65
  12   4  14    3.78    3.00
  12   8 -15   42.81    4.64
  12   4  15   37.92    4.71
  12   8 -16   -0.14    2.39
  12   4  16    2.43    3.02
  12   8 -17    5.30    2.79
  12   4  17    6.33    3.24
  12   8 -18    2.24    2.62
  12   4  18   -1.77    2.78
  12   8 -19   -0.42    2.55
  12   4  19    1.51    3.06
  12   8 -20    3.13    3.01
  12   8 -21    9.61    3.54
  14   5 -17   24.31    4.51
  14   9  16    0.50    2.99
  14   5 -16    3.05    3.00
  14   9  15   17.38    4.13
  14   5 -15   18.86    4.15
  14   9  14   36.07    4.93
  14   5 -14   40.77    5.04
  14   9  13   17.22    3.89
  14   5 -13   13.85    3.62
  14   9  12   10.03    3.44
  14   5 -12    8.00    3.21
  14   9  11    9.91    3.41
  14   5 -11    5.74    2.89
  14   9  10   23.63    4.23
  14   5 -10   17.95    3.65
  14   9   9    7.23    3.32
  14   5  -9    7.83    2.99
  14   9   8    3.05    2.88
  14   5  -8    0.55    2.54
  14   5  -8   -0.39    2.17
  14   9   7    1.80    2.77
  14   5  -7    3.63    2.69
  14   5  -7    2.86    2.46
  14   9   6   30.38    4.31
  14   5  -6   27.16    4.05
  14   5  -6   22.54    3.78
  14   9   5    4.75    2.90
  14   5  -5    4.96    2.97
  14   5  -5    3.27    2.48
  14   9   4   93.72    5.94
  14   5  -4   87.97    5.81
  14   5  -4   72.50    5.32
  14   9   3    4.90    2.88
  14   5  -3    8.30    3.17
  14   5  -3    5.71    2.66
  14   9   2   39.49    4.54
  14   5  -2   37.18    4.58
  14   5  -2   25.92    3.96
  14   9   1    5.52    2.92
  14   5  -1    5.75    3.10
  14   9   0   34.43    4.40
  14   5   0   31.41    4.36
  14   9  -1    6.09    2.92
  14   5   1    7.23    3.16
  14   9  -2    8.58    3.08
  14   5   2    4.57    3.03
  14   9  -3   49.72    4.79
  14   5   3   56.09    5.15
  14   9  -4    6.50    2.88
  14   5   4    1.45    2.79
  14   9  -5   11.91    3.25
  14   5   5   10.84    3.38
  14   9  -6   35.58    4.43
  14   5   6   32.46    4.52
  14   9  -7    1.36    2.57
  14   9  -7    1.41    2.27
  14   5   7   -2.55    2.55
  14   9  -8  158.67    7.10
  14   9  -8  150.90    6.79
  14   5   8  150.95    7.42
  14   9  -9   11.55    3.25
  14   9  -9    7.06    2.78
  14   5   9   12.20    3.66
  14   9 -10  417.15   10.73
  14   9 -10  413.37   10.70
  14   5  10  410.03   11.52
  14   9 -11   12.37    3.26
  14   5  11   15.08    3.86
  14   9 -12   -2.36    2.35
  14   5  12   -2.33    2.87
  14   9 -13    0.87    2.58
  14   5  13   -0.39    3.01
  14   9 -14   15.91    3.72
  14   5  14   13.22    4.05
  14   9 -15   22.70    4.14
  14   9 -16    0.63    2.79
  14   9 -17    6.19    3.30
  16   6 -10    5.49    3.25
  16   6  -9    5.39    3.15
  16   6  -8    2.04    2.81
  16   6  -7   -0.34    2.89
  16   6  -7    0.45    2.69
  16   6  -6    3.67    3.14
  16   6  -6    2.78    2.73
  16   6  -5   10.63    3.56
  16   6  -5   10.78    3.30
  16   6  -4   71.11    5.92
  16   6  -4   60.78    5.55
  16   6  -3    5.92    3.35
  16   6  -3    6.69    3.07
  16   6  -2   20.06    4.19
  16   6  -2   11.38    3.42
  16   6  -1    5.35    3.37
  16   6  -1    2.79    2.78
  16   6   0    4.46    3.37
  16   6   0   -0.13    2.58
  16  10  -2    3.37    3.18
  16  10  -3   94.78    6.45
  16  10  -4   18.85    4.03
  16  10  -5   51.85    5.32
  16  10  -6    3.10    3.05
  16  10  -7    3.53    3.21
  16  10  -8    7.52    3.42
  16  10  -9    3.48    3.11
  -1  -3 -30    3.95    2.75
   1  -2 -30    9.34    3.18
  -1  -3 -29    6.87    2.86
   1  -2 -29    3.72    2.78
  -1  -3 -28    3.95    2.57
   1  -2 -28    2.73    2.49
   1  -2 -27   29.80    4.18
  -1  -3 -26   86.36    5.60
   1  -2 -26   94.02    5.90
  -1  -3 -25   20.85    3.33
   1  -2 -25   28.39    3.83
  -1  -3 -24    7.49    2.45
   1  -2 -24    7.13    2.51
   1  -2 -24    7.04    2.53
  -1  -3 -23   86.86    5.20
  -1  -3 -23   33.75    3.99
   1  -2 -23   94.07    5.43
   1  -2 -23   52.82    4.50
  -1  -3 -22   80.02    4.85
  -1  -3 -22   32.39    3.86
   1  -2 -22   94.85    5.29
   1  -2 -22   57.96    4.52
  -1  -3 -21   25.65    3.29
  -1  -3 -21    8.58    2.30
   1  -2 -21   19.17    3.02
  -1  -3 -20   26.80    3.34
  -1  -3 -20    7.72    2.26
   1  -2 -20   29.18    3.54
  -1  -3 -19    3.25    1.95
  -1  -3 -19    1.89    1.90
   1  -2 -19    5.26    2.13
  -1  -3 -18    0.74    1.72
  -1  -3 -18    0.60    1.78
   1  -2 -18   -0.08    1.69
  -1  -3 -17    3.68    1.82
  -1  -3 -17    1.10    1.63
   1  -2 -17    4.61    1.95
  -1  -3 -16    5.86    1.81
  -1  -3 -16    1.71    1.54
   1  -2 -16    6.88    1.99
  -1  -3 -15    1.66    1.47
  -1  -3 -15    1.50    1.35
   1  -2 -15    4.22    1.67
  -1  -3 -14   42.12    2.97
  -1  -3 -14   17.14    2.10
   1  -2 -14   46.38    3.20
  -1  -3 -13    0.28    1.17
  -1  -3 -13   -0.32    1.07
   1  -2 -13    0.95    1.25
  -1  -3 -12   35.90    2.60
  -1  -3 -12   12.93    1.75
   1  -2 -12   41.93    2.79
   1   3  11  337.68    3.36
  -1  -3 -11  232.90    4.95
  -1  -3 -11   87.83    3.45
   1  -2 -11  256.02    5.32
   1   3  10    2.58    0.77
  -1  -3 -10    1.37    0.99
  -1  -3 -10    0.49    0.96
   1  -2 -10    1.41    1.01
   1   3   9    1.81    0.71
  -1  -3  -9    1.23    0.85
  -1  -3  -9    0.25    0.81
   1  -2  -9    2.93    1.05
   1   3   8   33.48    1.47
  -1  -3  -8   24.68    1.87
  -1  -3  -8    0.43    0.54
   1  -2  -8   27.36    2.13
   1   3   7    1.49    0.71
  -1  -3  -7    1.39    0.79
  -1  -3  -7    0.35    0.86
   1  -2  -7    0.62    0.83
   1   3   6  108.62    2.05
  -1  -3  -6   78.55    2.30
  -1  -3  -6   23.98    2.01
   1  -2  -6   86.49    2.63
   1   3   5   28.62    1.49
  -1  -3  -5   20.67    1.48
  -1  -3  -5    7.01    1.15
   1  -2  -5   23.97    1.78
  -1   2   4   19.49    1.02
   1   3   4   19.18    1.43
  -1  -3  -4    1.81    0.51
   1  -2  -4   16.96    1.58
  -1   2   3   80.98    1.53
   1   3   3   89.71    1.92
  -1  -3  -3   -0.03    0.12
   1  -2  -3   73.70    1.91
  -1   2   2   24.27    1.11
   1   3   2   25.66    1.30
  -1  -3  -2    8.73    0.90
  -1   2   1    4.65    0.67
   1   3   1    4.33    0.72
  -1  -3  -1    2.26    0.61
  -1   2   0   50.75    1.52
   1   3   0   22.42    1.06
  -1   2  -1   -0.04    0.11
   1   3  -1   20.74    1.08
  -1   2  -2    9.23    1.15
  -1   2  -2    6.41    0.73
   1   3  -2    5.88    0.85
  -1   2  -3   33.18    1.68
  -1   2  -3   26.81    1.42
   1   3  -3   22.07    1.49
  -1   2  -4    6.84    1.07
  -1   2  -4    6.05    0.93
   1   3  -4    2.54    0.94
   1   3  -4    8.05    0.97
  -1   2  -5    0.05    0.85
  -1   2  -5    0.77    0.67
   1   3  -5   -0.08    0.81
   1   3  -5    0.34    0.71
  -1   2  -6  146.32    3.08
  -1   2  -6    0.25    0.27
   1   3  -6   37.32    1.84
   1   3  -6  151.43    3.21
  -1   2  -7  262.98    4.04
  -1   2  -7    0.26    0.28
   1   3  -7   64.68    2.18
   1   3  -7  268.20    4.40
  -1   2  -8  338.99    4.67
  -1   2  -8    0.03    0.28
   1   3  -8  110.75    2.73
  -1   2  -9    9.40    1.26
  -1   2  -9    8.16    1.19
   1   3  -9    4.17    0.96
   1   3  -9    9.78    1.44
  -1   2 -10    0.50    0.91
  -1   2 -10   -0.47    0.72
   1   3 -10   -0.47    0.75
   1   3 -10   -0.77    0.80
  -1   2 -11   50.22    2.42
  -1   2 -11   44.98    2.55
   1   3 -11   31.77    1.97
   1   3 -11   50.17    2.84
  -1   2 -12  340.94    5.26
  -1   2 -12  243.68    5.44
  -1   2 -12   81.36    2.54
   1   3 -12  220.00    4.05
   1   3 -12  304.60    6.18
  -1   2 -13   16.30    1.93
  -1   2 -13    1.55    0.66
  -1   2 -13    4.61    1.04
   1   3 -13   16.20    1.75
   1   3 -13   15.62    2.11
  -1   2 -14   49.80    2.65
  -1   2 -14    0.24    0.31
  -1   2 -14   10.84    1.35
   1   3 -14   39.80    2.24
   1   3 -14   45.07    3.16
  -1   2 -15    6.57    1.52
  -1   2 -15    0.33    0.34
  -1   2 -15    0.42    0.43
   1   3 -15    7.39    1.35
   1   3 -15    3.57    1.68
  -1   2 -16    0.19    0.41
   1   3 -16    3.29    1.71
  -1   2 -17    1.78    1.12
   1   3 -17   26.18    3.23
  -1   2 -18   14.08    2.55
   1   3 -18   13.66    2.52
  -1   2 -19  118.35    5.46
   1   3 -19  122.29    5.50
  -1   2 -20   57.95    4.32
   1   3 -20   60.15    4.33
  -1   2 -21   34.07    3.71
   1   3 -21   37.08    3.72
  -1   2 -22    1.70    1.90
   1   3 -22    2.12    1.90
  -1   2 -23   73.21    4.91
   1   3 -23   80.51    5.21
  -1   2 -24   47.66    4.38
   1   3 -24   53.55    4.61
  -1   2 -25   -0.34    1.97
   1   3 -25   -1.53    1.85
  -1   2 -26    0.74    2.13
   1   3 -26   -0.20    1.99
  -1   2 -27    7.28    2.79
   1   3 -27    4.85    2.60
  -1   2 -28   53.03    5.08
   1   3 -28   55.05    5.17
  -1   2 -29    3.59    2.62
   1   3 -29    5.20    2.80
  -1   2 -30   42.32    5.06
   1   3 -30   48.62    5.27
  -3  -4 -29   -0.73    2.21
   3  -1 -29    0.05    2.49
  -3  -4 -28   18.02    3.53
   3  -1 -28   23.56    4.00
  -3  -4 -27    6.25    2.63
   3  -1 -27    8.70    3.00
  -3  -4 -26    2.14    2.10
   3  -1 -26    0.51    2.11
  -3  -4 -25   53.70    4.54
   3  -1 -25   65.83    5.09
  -3  -4 -24    4.35    2.21
   3  -1 -24    5.16    2.55
  -3  -4 -23   93.50    5.25
   3  -1 -23  118.52    6.11
  -3  -4 -22    5.79    2.17
   3  -1 -22    6.43    2.44
  -3  -4 -21    5.32    2.08
  -3  -4 -21    2.73    1.97
   3  -1 -21    7.57    2.49
  -3  -4 -20   42.30    3.68
  -3  -4 -20   17.22    2.69
   3  -1 -20   51.56    4.25
  -3  -4 -19    6.84    2.13
  -3  -4 -19    1.06    1.92
   3  -1 -19    9.99    2.54
  -3  -4 -18    0.24    1.63
  -3  -4 -18   -0.09    1.78
   3  -1 -18    1.23    1.93
  -3  -4 -17    0.52    1.57
  -3  -4 -17   -0.05    1.65
   3  -1 -17    2.09    1.87
  -3  -4 -16    4.69    1.77
  -3  -4 -16    3.41    1.74
   3  -1 -16    6.24    2.02
  -3  -4 -15   -0.86    1.30
  -3  -4 -15    0.30    1.40
   3  -1 -15   -0.29    1.54
   3   4  14   76.33    2.91
  -3  -4 -14   46.75    3.09
  -3  -4 -14   20.35    2.29
   3  -1 -14   62.21    3.79
   3   4  13   53.64    2.63
  -3  -4 -13   33.42    2.72
  -3  -4 -13   13.35    1.87
   3  -1 -13   44.83    3.26
   3   4  12    2.16    1.22
  -3  -4 -12    0.07    1.02
  -3  -4 -12    2.32    1.24
   3  -1 -12    2.14    1.41
   3   4  11  355.57    5.07
  -3  -4 -11  213.31    4.73
  -3  -4 -11  110.59    3.82
   3  -1 -11  289.25    6.08
   3   4  10   90.23    2.94
  -3  -4 -10   55.44    2.60
  -3  -4 -10   35.58    2.72
   3  -1 -10   74.49    3.40
   3   4   9   10.98    1.44
  -3  -4  -9    9.08    1.33
  -3  -4  -9    4.90    1.25
   3  -1  -9   13.13    1.21
   3  -1  -9   12.44    1.69
   3   4   8   22.37    1.94
  -3  -4  -8   13.04    1.40
  -3  -4  -8   10.84    1.44
   3  -1  -8   22.59    1.42
   3  -1  -8   19.47    1.92
   3   4   7   18.39    1.90
  -3  -4  -7    9.54    1.17
  -3  -4  -7   -0.33    0.53
   3  -1  -7   17.33    1.45
   3  -1  -7   18.08    1.81
   3   4   6    3.18    1.11
  -3  -4  -6    2.38    0.73
  -3  -4  -6    0.32    0.58
   3  -1  -6    3.88    0.89
   3  -1  -6    3.25    1.01
   3   4   5   51.49    2.37
  -3  -4  -5   25.85    1.43
  -3  -4  -5   31.72    2.00
   3  -1  -5   52.56    1.96
   3  -1  -5   37.79    2.21
   3   4   4   28.79    2.02
  -3  -4  -4   12.14    1.12
  -3  -4  -4   23.54    1.86
   3  -1  -4   31.83    1.85
   3  -1  -4   25.85    1.94
   3   4   3   58.86    2.43
  -3  -4  -3   15.89    1.28
   3  -1  -3   65.03    2.35
   3   4   2   10.40    1.39
  -3  -4  -2   -0.10    0.14
   3  -1  -2   12.03    1.36
   3   4   1    4.56    0.75
  -3  -4  -1    0.13    0.27
   3  -1  -1   40.73    2.24
   3   4   0    0.21    0.19
  -3  -4   0   52.90    2.46
   3  -1   0   61.25    2.52
   3   4  -1   84.23    2.78
   3  -1   1   84.94    2.76
   3   4  -2    0.29    1.00
   3   4  -2    0.66    0.65
   3  -1   2   -0.12    0.88
  -3   1  -3   -0.05    0.17
   3   4  -3   22.23    1.89
   3   4  -3   20.30    1.55
   3  -1   3   -0.09    0.19
  -3   1  -4    0.13    0.39
   3   4  -4    7.50    1.24
   3   4  -4    7.78    1.04
   3  -1   4   -0.03    0.47
  -3   1  -5    3.16    0.76
   3   4  -5   17.81    1.79
   3   4  -5   16.61    1.63
   3  -1   5    9.40    1.21
  -3   1  -6  238.49    4.45
   3   4  -6  365.83    4.99
   3   4  -6  383.74    5.19
  -3   1  -7   47.67    2.36
   3   4  -7   61.66    2.43
   3   4  -7    0.13    0.44
   3  -1   7   -0.41    0.65
  -3   1  -8   76.58    2.98
  -3   1  -8  109.05    2.25
   3   4  -8   80.96    2.67
   3   4  -8  104.75    3.33
   3  -1   8   69.25    2.86
  -3   1  -9  100.81    3.51
  -3   1  -9  137.01    2.59
   3   4  -9   98.76    2.95
   3   4  -9  130.96    3.81
   3  -1   9  159.41    4.07
  -3   1 -10   -0.49    0.87
  -3   1 -10   -0.13    0.71
   3   4 -10    0.09    0.87
   3   4 -10   -0.23    1.00
   3  -1  10    0.72    1.25
  -3   1 -11  165.67    4.68
  -3   1 -11  182.91    3.24
   3   4 -11   82.51    2.78
   3   4 -11  201.86    5.05
   3  -1  11  224.21    4.92
  -3   1 -12   23.67    2.43
  -3   1 -12   27.86    1.96
   3   4 -12    7.89    1.29
   3   4 -12   34.82    2.82
   3  -1  12   32.24    2.73
  -3   1 -13    0.67    1.23
  -3   1 -13    0.92    0.90
   3   4 -13    0.26    0.94
   3   4 -13    1.59    1.38
   3  -1  13    0.81    1.46
   3   4 -14   25.33    2.11
   3   4 -14   90.15    4.19
   3  -1  14   93.08    3.91
  -3   1 -15    0.35    1.10
   3   4 -15    0.75    1.09
   3   4 -15    1.40    1.52
   3  -1  15    1.09    1.66
  -3   1 -16   15.51    2.40
   3   4 -16   26.75    3.19
   3  -1  16   26.96    3.10
  -3   1 -17    0.00    1.60
   3   4 -17    1.02    1.70
   3  -1  17    0.10    1.85
  -3   1 -18   38.91    3.68
   3   4 -18   50.28    4.05
  -3   1 -19   19.75    2.93
   3   4 -19   28.34    3.45
  -3   1 -20    5.37    2.10
   3   4 -20    9.25    2.38
  -3   1 -21    1.58    1.86
   3   4 -21    5.05    2.15
  -3   1 -22   12.67    2.71
   3   4 -22   18.16    3.11
  -3   1 -23    9.05    2.63
   3   4 -23   13.62    2.93
  -3   1 -24    5.38    2.37
   3   4 -24    6.74    2.54
  -3   1 -25   34.38    4.19
   3   4 -25   35.98    4.32
  -3   1 -26    0.11    2.19
   3   4 -26    0.80    2.23
  -3   1 -27   13.19    3.28
   3   4 -27   18.07    3.61
  -3   1 -28    1.88    2.50
   3   4 -28    3.38    2.67
  -3   1 -29    1.65    2.56
   3   4 -29   -1.52    2.37
  -5  -5 -29    6.65    2.73
   5   0 -29    2.83    2.84
  -5  -5 -28    4.00    2.50
   5   0 -28    2.39    2.75
  -5  -5 -27    3.77    2.48
   5   0 -27    3.97    2.76
  -5  -5 -26   66.03    5.00
   5   0 -26  100.76    6.36
  -5  -5 -25    2.26    2.03
   5   0 -25    3.72    2.55
  -5  -5 -24    0.39    1.85
   5   0 -24    1.67    2.30
  -5  -5 -23    0.43    1.86
   5   0 -23   -0.45    2.04
  -5  -5 -22  156.09    6.34
   5   0 -22  240.19    8.30
  -5  -5 -21    5.17    2.10
   5   0 -21    6.24    2.45
  -5  -5 -20    1.25    1.71
   5   0 -20    2.94    2.09
  -5  -5 -19    3.84    1.84
  -5  -5 -19    6.15    2.11
   5   0 -19    5.85    2.22
  -5  -5 -18   27.28    3.13
  -5  -5 -18   32.50    3.65
   5   0 -18   43.89    4.07
  -5  -5 -17    9.97    2.21
  -5  -5 -17   12.19    2.48
   5   0 -17   23.73    3.28
  -5  -5 -16   15.49    2.41
  -5  -5 -16   17.02    2.64
   5   0 -16   21.91    3.01
   5   5  15   -0.78    1.71
  -5  -5 -15    0.43    1.37
  -5  -5 -15   -0.31    1.60
   5   0 -15    0.10    1.63
   5   5  14   48.22    3.38
  -5  -5 -14   22.96    2.58
  -5  -5 -14   29.41    3.30
   5   0 -14    0.32    0.63
   5   5  13   19.91    2.41
  -5  -5 -13    6.89    1.69
  -5  -5 -13   10.27    2.00
   5   0 -13   -0.76    0.41
   5   5  12  256.66    5.62
  -5  -5 -12  115.76    4.04
  -5  -5 -12  155.34    4.92
   5   0 -12   -0.37    0.34
   5   5  11   78.23    3.54
  -5  -5 -11   35.62    2.50
  -5  -5 -11   52.43    3.37
   5   0 -11   76.00    2.62
   5   0 -11   -0.18    0.35
   5   5  10   -0.55    1.40
  -5  -5 -10    1.52    1.03
  -5  -5 -10    1.66    1.33
   5   0 -10    1.52    1.09
   5   0 -10   -0.21    0.28
   5   5   9   62.79    3.23
  -5  -5  -9   25.32    2.04
  -5  -5  -9   45.10    3.01
   5   0  -9   62.87    2.61
   5   0  -9   -0.12    0.28
   5   5   8   68.83    3.28
  -5  -5  -8   26.85    1.94
  -5  -5  -8   57.07    3.11
   5   0  -8   75.86    2.83
   5   5   7   16.65    2.00
  -5  -5  -7    5.90    1.16
  -5  -5  -7   13.16    1.76
   5   0  -7   18.46    2.12
   5   0  -7    4.56    0.99
   5   5   6  255.16    5.24
  -5  -5  -6   62.26    2.35
  -5  -5  -6  195.94    4.73
   5   0  -6  267.21    4.63
   5   0  -6  149.00    4.16
   5   5   5  138.28    4.04
  -5  -5  -5  112.09    3.74
   5   0  -5  141.90    3.63
   5   0  -5   98.61    3.39
   5   5   4   16.07    1.92
  -5  -5  -4   14.63    1.76
   5   0  -4   16.77    1.77
   5   0  -4   11.83    1.59
   5   5   3    4.05    1.37
  -5  -5  -3    2.31    1.14
   5   0  -3    2.22    1.25
   5   5   2   89.17    3.29
   5   0  -2   92.98    3.24
   5   5   1    0.06    0.32
   5   0  -1   27.33    2.32
   5   5   0    9.34    1.59
   5   0   0   11.53    1.69
   5   5  -1   14.17    1.79
   5   0   1   16.77    1.92
   5   5  -2   13.52    1.78
   5   5  -2   15.67    1.65
   5   0   2   16.23    1.92
   5   5  -3   10.46    1.64
   5   5  -3    9.79    1.26
   5   0   3   -0.32    0.29
   5   5  -4   60.64    2.92
   5   5  -4   45.82    2.16
   5   0   4   57.46    2.98
   5   5  -5    0.52    1.20
   5   5  -5    0.22    0.57
   5   0   5    1.86    1.38
  -5   0  -6    2.66    1.05
   5   5  -6    5.42    1.45
   5   5  -6    6.27    1.31
   5   0   6    5.17    1.61
  -5   0  -7   39.89    2.50
   5   5  -7   77.24    3.22
   5   5  -7   77.20    3.15
   5   0   7   82.54    3.58
  -5   0  -8  326.08    6.25
   5   5  -8  660.91    7.86
   5   5  -8  618.00    7.99
   5   0   8  694.06    8.89
  -5   0  -9  116.27    4.05
   5   5  -9  188.97    4.45
   5   5  -9  192.44    4.93
   5   0   9  221.17    5.44
  -5   0 -10    8.65    1.66
   5   5 -10   12.91    1.74
   5   5 -10   13.38    1.97
   5   0  10   12.43    2.12
  -5   0 -11   54.30    3.25
  -5   0 -11   97.35    3.07
   5   5 -11   77.30    3.19
   5   5 -11   86.48    3.86
   5   0  11  101.53    4.31
  -5   0 -12  245.61    6.24
  -5   0 -12  397.91    5.49
   5   5 -12  292.42    5.50
   5   5 -12  371.01    7.40
   5   0  12  415.18    7.56
  -5   0 -13    1.42    1.49
   5   5 -13    3.74    1.42
   5   5 -13    6.35    1.89
   5   0  13    5.80    2.07
  -5   0 -14    1.51    1.55
   5   5 -14    3.61    1.39
   5   5 -14    4.96    1.87
   5   0  14    4.52    2.08
  -5   0 -15    6.86    2.00
   5   5 -15   10.36    2.33
   5   0  15   10.94    2.48
  -5   0 -16    8.90    2.20
   5   5 -16   17.82    2.86
   5   0  16   17.85    2.84
  -5   0 -17    4.89    2.02
   5   5 -17    8.54    2.39
   5   0  17    9.83    2.57
  -5   0 -18    1.59    1.74
   5   5 -18    5.53    2.22
   5   0  18    4.97    2.30
  -5   0 -19  105.99    5.33
   5   5 -19  156.64    6.32
  -5   0 -20   57.93    4.41
   5   5 -20   89.36    5.22
  -5   0 -21  127.70    6.08
   5   5 -21  166.94    6.85
  -5   0 -22   63.10    4.75
   5   5 -22  100.12    5.72
  -5   0 -23    3.77    2.23
   5   5 -23    3.20    2.35
  -5   0 -24   36.85    4.16
   5   5 -24   45.20    4.62
  -5   0 -25   22.31    3.71
   5   5 -25   30.89    4.19
  -5   0 -26    1.71    2.33
   5   5 -26    2.67    2.64
  -5   0 -27   16.86    3.68
   5   5 -27   24.11    4.28
  -5   0 -28   16.96    3.64
   5   5 -28   26.64    4.38
  -7  -6 -27    6.90    2.73
   7   1 -27    9.11    3.42
  -7  -6 -26   19.11    3.52
   7   1 -26   40.62    4.98
  -7  -6 -25   11.73    2.81
   7   1 -25   27.01    4.23
  -7  -6 -24   13.87    3.01
   7   1 -24   31.61    4.48
  -7  -6 -23   10.80    2.76
   7   1 -23   27.32    4.00
  -7  -6 -22    2.38    1.87
   7   1 -22    2.40    2.31
  -7  -6 -21    2.01    1.76
   7   1 -21    1.46    2.21
  -7  -6 -20    6.36    2.16
   7   1 -20   18.46    3.33
  -7  -6 -19   -0.19    1.55
   7   1 -19    3.13    2.24
  -7  -6 -18    0.42    1.49
  -7  -6 -18    0.72    2.15
   7   1 -18    0.82    1.99
  -7  -6 -17    1.98    1.56
  -7  -6 -17    3.04    2.20
   7   1 -17    1.39    1.97
   7   6  16    0.26    2.06
  -7  -6 -16   -0.45    1.31
  -7  -6 -16   -0.03    2.04
   7   1 -16    1.59    1.90
   7   6  15    2.01    2.24
  -7  -6 -15    0.74    1.40
  -7  -6 -15    2.16    1.97
   7   1 -15    3.59    2.10
   7   6  14    0.41    2.20
  -7  -6 -14    1.07    1.44
  -7  -6 -14    2.54    2.00
   7   1 -14    1.71    1.96
   7   6  13   64.80    4.22
  -7  -6 -13   18.79    2.42
  -7  -6 -13   57.65    4.19
   7   1 -13   56.49    4.23
   7   6  12    3.20    2.14
  -7  -6 -12    0.48    1.27
  -7  -6 -12    1.94    1.85
   7   1 -12    0.84    1.82
   7   6  11    6.14    2.24
  -7  -6 -11    1.34    1.22
  -7  -6 -11    4.86    1.97
   7   1 -11    5.28    1.67
   7   1 -11    3.67    1.91
   7   6  10  167.97    5.48
  -7  -6 -10   39.09    2.66
  -7  -6 -10  141.45    5.10
   7   1 -10  165.08    4.58
   7   1 -10  138.27    5.29
   7   6   9    2.17    1.97
  -7  -6  -9    0.79    1.07
  -7  -6  -9    4.50    1.82
   7   1  -9    4.24    1.76
   7   1  -9    5.13    1.82
   7   6   8   67.53    3.98
  -7  -6  -8   59.72    3.72
   7   1  -8   66.45    3.52
   7   1  -8   54.92    3.62
   7   6   7   14.84    2.44
  -7  -6  -7   10.25    2.02
   7   1  -7   13.14    2.08
   7   1  -7   11.05    2.06
   7   6   6   29.76    3.09
  -7  -6  -6   26.64    3.03
   7   1  -6   31.56    2.91
   7   1  -6   23.09    2.77
   7   6   5  204.06    5.58
   7   1  -5  211.28    5.20
   7   1  -5  143.01    4.77
   7   6   4  271.53    6.30
   7   1  -4  272.49    5.80
   7   6   3   48.04    3.43
   7   1  -3   48.87    3.31
   7   6   2    3.81    1.67
   7   1  -2    3.98    1.73
   7   6   1    0.45    0.88
   7   1  -1  124.85    4.43
   7   6   0   13.61    2.15
   7   1   0   11.56    2.12
   7   6  -1  175.99    5.09
   7   1   1  183.15    5.23
   7   6  -2   35.23    3.03
   7   6  -2   27.62    2.35
   7   1   2   34.86    3.09
   7   6  -3   29.73    2.80
   7   6  -3   25.22    2.36
   7   1   3   32.03    3.02
   7   6  -4   38.84    3.04
   7   6  -4   34.24    2.63
   7   1   4   -0.11    0.49
   7   6  -5   18.47    2.37
   7   6  -5   19.46    2.09
   7   1   5   17.60    2.51
   7   6  -6   84.93    3.84
   7   6  -6   71.03    3.44
   7   1   6   84.19    4.18
   7   6  -7    2.42    1.59
   7   6  -7    2.15    1.34
   7   1   7    1.22    1.87
   7   6  -8   17.44    2.32
   7   6  -8   15.17    2.10
   7   1   8   19.02    2.80
  -7  -1  -9    2.55    1.41
   7   6  -9    6.38    1.81
   7   6  -9    7.31    1.81
   7   1   9    5.83    2.25
  -7  -1 -10    1.71    1.46
   7   6 -10    9.50    1.98
   7   6 -10   10.32    2.11
   7   1  10    9.17    2.44
  -7  -1 -11   12.15    2.15
   7   6 -11   22.40    2.74
   7   6 -11   28.85    3.25
   7   1  11   25.70    3.17
  -7  -1 -12   23.23    2.86
   7   6 -12   48.52    3.31
   7   6 -12   52.67    3.79
   7   1  12   56.39    4.28
  -7  -1 -13   33.98    3.30
   7   6 -13   63.11    3.56
   7   6 -13   66.00    4.28
   7   1  13   72.51    4.57
  -7  -1 -14   -0.60    1.54
   7   6 -14    0.59    1.55
   7   6 -14    0.00    1.82
   7   1  14    0.11    2.31
  -7  -1 -15   33.27    3.35
   7   6 -15   63.72    4.47
   7   1  15   75.74    4.78
  -7  -1 -16    1.07    1.63
   7   6 -16    2.15    1.98
   7   1  16    0.47    2.32
  -7  -1 -17    2.78    1.79
   7   6 -17    7.11    2.30
   7   1  17    7.50    2.57
  -7  -1 -18   11.21    2.54
   7   6 -18   24.85    3.41
   7   1  18   20.77    3.18
  -7  -1 -19    5.32    2.12
   7   6 -19   13.80    2.92
  -7  -1 -20    6.51    2.32
   7   6 -20   11.59    2.87
  -7  -1 -21    2.11    1.94
   7   6 -21    5.64    2.55
  -7  -1 -22    0.14    1.84
   7   6 -22    1.66    2.29
  -7  -1 -23   12.33    2.89
   7   6 -23   20.84    3.69
  -7  -1 -24   61.71    4.99
   7   6 -24   94.38    6.18
  -7  -1 -25   26.92    4.13
   7   6 -25   44.00    4.99
  -7  -1 -26   10.52    3.05
   7   6 -26   20.50    3.88
  -7  -1 -27   -0.07    2.26
   7   6 -27    2.81    2.88
   9   2 -25   24.81    4.55
   9   2 -24    1.39    2.69
   9   2 -23   19.41    3.88
  -9  -7 -22   21.65    3.45
   9   2 -22   70.72    5.74
  -9  -7 -21   17.11    3.05
   9   2 -21   54.39    5.13
  -9  -7 -20    2.43    1.78
   9   2 -20   10.16    3.08
  -9  -7 -19    2.16    1.71
   9   2 -19    1.95    2.45
  -9  -7 -18   -0.61    1.42
   9   2 -18    2.90    2.46
  -9  -7 -17    6.01    1.99
   9   2 -17   24.50    3.67
   9   7  16   41.43    4.02
  -9  -7 -16    9.47    2.20
  -9  -7 -16   27.57    3.40
   9   2 -16   32.21    3.99
   9   7  15   10.31    2.81
  -9  -7 -15    1.43    1.46
  -9  -7 -15    8.35    2.49
   9   2 -15    9.96    2.73
   9   7  14   -0.77    2.10
  -9  -7 -14    0.63    1.31
  -9  -7 -14    0.89    2.13
   9   2 -14    0.48    1.98
   9   7  13   -1.98    2.09
  -9  -7 -13   -0.50    1.20
  -9  -7 -13    0.84    2.04
   9   2 -13    0.81    2.07
   9   7  12  101.54    5.19
  -9  -7 -12   98.47    5.14
   9   2 -12   94.81    5.30
   9   7  11   28.79    3.55
  -9  -7 -11   27.70    3.30
   9   2 -11   31.92    3.80
   9   7  10   -0.58    2.36
   9   2 -10    1.11    2.01
   9   2 -10    1.60    2.01
   9   7   9  194.39    6.54
   9   2  -9  203.74    5.94
   9   2  -9  158.81    6.07
   9   7   8   20.91    3.23
   9   2  -8   22.26    2.96
   9   2  -8   15.34    2.69
   9   7   7    0.31    2.24
   9   2  -7   -0.92    1.96
   9   2  -7    0.55    1.77
   9   7   6   69.85    4.64
   9   2  -6   75.44    4.33
   9   2  -6   60.58    4.23
   9   7   5  175.98    6.14
   9   2  -5  182.31    5.84
   9   2  -5  135.68    5.38
   9   7   4   58.84    4.38
   9   2  -4   56.82    4.09
   9   2  -4   40.41    3.75
   9   7   3   -0.19    0.70
   9   2  -3   12.53    2.62
   9   7   2    0.24    0.63
   9   2  -2  156.24    5.66
   9   7   1    0.64    0.80
   9   2  -1    0.74    2.18
   9   7   0    6.79    2.31
   9   2   0    8.54    2.56
   9   7  -1   44.99    3.85
   9   2   1   44.40    3.98
   9   7  -2    1.95    2.19
   9   7  -2    2.51    1.57
   9   2   2    1.20    2.21
   9   7  -3   76.01    4.41
   9   7  -3   64.02    3.72
   9   2   3   -0.48    1.14
   9   7  -4    2.29    2.15
   9   7  -4    2.36    1.61
   9   2   4   -0.11    0.66
   9   7  -5    2.23    2.17
   9   7  -5    3.53    1.71
   9   2   5   -0.07    0.94
   9   7  -6   14.55    2.65
   9   7  -6   12.48    2.27
   9   2   6   11.38    2.86
   9   7  -7   25.91    3.11
   9   7  -7   25.05    2.90
   9   2   7   26.21    3.49
   9   7  -8   39.37    3.67
   9   7  -8   33.74    3.51
   9   2   8   36.95    4.21
   9   7  -9  131.26    5.25
   9   7  -9  131.00    5.31
   9   2   9  134.80    5.91
   9   7 -10    0.22    1.93
   9   7 -10    0.69    1.81
   9   2  10    1.28    2.51
   9   7 -11  149.22    5.47
   9   7 -11  149.74    5.78
   9   2  11  165.25    6.43
   9   7 -12   49.99    3.73
   9   7 -12   51.90    4.11
   9   2  12   48.53    4.39
   9   7 -13   22.90    2.83
   9   7 -13   21.37    3.14
   9   2  13   26.47    3.55
  -9  -2 -14    4.35    1.87
   9   7 -14   10.10    2.60
   9   2  14   10.25    2.92
  -9  -2 -15    1.74    1.68
   9   7 -15    3.23    2.13
   9   2  15    6.19    2.75
  -9  -2 -16    2.63    1.86
   9   7 -16    3.93    2.30
   9   2  16    1.08    2.58
  -9  -2 -17    3.18    1.92
   9   7 -17    2.15    2.27
   9   2  17   -1.70    2.40
  -9  -2 -18    3.89    2.01
   9   7 -18    7.78    2.76
   9   2  18    7.44    2.98
  -9  -2 -19    0.54    1.79
   9   7 -19    0.24    2.18
   9   2  19    2.48    2.63
  -9  -2 -20   23.71    3.61
   9   7 -20   57.78    5.11
  -9  -2 -21   36.32    4.07
   9   7 -21   78.40    5.72
  -9  -2 -22   64.14    5.04
   9   7 -22  152.22    7.43
  -9  -2 -23   10.61    3.07
   9   7 -23   26.36    4.29
  -9  -2 -24    0.26    2.11
   9   7 -24    1.72    2.73
  -9  -2 -25   38.34    4.58
   9   7 -25   67.47    5.95
  11   3 -23    2.38    3.00
  11   3 -22    1.53    2.92
  11   3 -21    0.98    2.77
  11   3 -20    5.53    3.02
  11   3 -19    3.33    2.74
  11   3 -18    5.62    2.77
  11   8  17   -1.22    2.47
  11   3 -17   -1.27    2.27
  11   8  16   -1.24    2.47
  11   3 -16    2.14    2.48
  11   8  15   10.18    3.06
  11   3 -15    8.87    3.04
  11   8  14    1.53    2.57
  11   3 -14   -0.69    2.26
  11   8  13   57.72    4.78
  11   3 -13   50.05    4.78
  11   8  12    2.45    2.61
  11   3 -12    1.77    2.28
  11   8  11   20.43    3.51
  11   3 -11   14.47    3.00
  11   8  10   52.88    4.57
  11   3 -10   55.58    4.24
  11   3 -10   40.79    4.16
  11   8   9   26.20    3.73
  11   3  -9   25.29    3.30
  11   3  -9   20.67    3.27
  11   8   8    3.55    2.58
  11   3  -8    4.34    2.40
  11   3  -8    3.20    2.12
  11   8   7    3.47    2.50
  11   3  -7    1.03    2.24
  11   3  -7    1.07    1.91
  11   8   6    1.73    2.38
  11   3  -6   -1.06    2.22
  11   3  -6   -0.86    1.84
  11   8   5   37.17    4.17
  11   3  -5   39.12    4.02
  11   3  -5   30.51    3.71
  11   8   4   62.51    4.75
  11   3  -4   70.67    4.76
  11   3  -4   50.65    4.29
  11   8   3   60.43    4.65
  11   3  -3   60.94    4.58
  11   8   2   60.44    4.63
  11   3  -2   67.44    4.81
  11   8   1   34.64    4.04
  11   3  -1   35.24    4.19
  11   8   0   33.14    4.00
  11   3   0   34.65    4.22
  11   8  -1   11.96    2.96
  11   8  -1    9.81    2.31
  11   3   1    9.60    2.94
  11   8  -2    6.79    2.67
  11   8  -2    7.99    2.22
  11   3   2    7.37    2.84
  11   8  -3    0.72    2.30
  11   8  -3    0.80    1.75
  11   3   3    0.24    2.50
  11   8  -4   22.25    3.33
  11   8  -4   20.07    2.81
  11   3   4   23.68    3.53
  11   8  -5   16.40    3.07
  11   8  -5   17.77    2.74
  11   3   5   15.33    3.21
  11   8  -6    7.01    2.56
  11   8  -6    5.70    2.16
  11   3   6    2.30    2.60
  11   8  -7    0.22    2.08
  11   8  -7   -1.48    1.69
  11   3   7   -0.28    2.48
  11   8  -8    0.26    2.09
  11   8  -8    0.72    1.84
  11   3   8    0.38    2.46
  11   8  -9   19.36    3.10
  11   8  -9   17.77    2.95
  11   3   9   20.92    3.63
  11   8 -10   -0.68    1.98
  11   8 -10    0.65    1.91
  11   3  10    2.50    2.64
  11   8 -11    5.45    2.34
  11   8 -11    4.65    2.27
  11   3  11    6.59    2.91
  11   8 -12    2.98    2.19
  11   8 -12    1.75    2.11
  11   3  12    3.40    2.84
  11   8 -13  114.82    5.87
  11   3  13  116.33    6.26
  11   8 -14    6.88    2.61
  11   3  14    6.87    3.05
  11   8 -15   74.56    5.27
  11   3  15   75.71    5.61
  11   8 -16   35.69    4.29
  11   3  16   38.68    4.68
  11   8 -17   43.99    4.69
  11   3  17   43.30    4.78
  11   8 -18   -1.16    2.25
  11   3  18    0.84    2.79
  11   8 -19    8.47    3.11
  11   3  19    5.52    3.12
  11   8 -20   36.41    4.81
 -11  -3 -21    0.33    1.96
  11   8 -21    0.69    2.70
 -11  -3 -22    6.32    2.70
  11   8 -22   34.80    4.88
  11   8 -23   85.65    6.56
  13   4 -19    3.91    3.25
  13   4 -18    0.40    2.78
  13   9  17    4.21    3.19
  13   4 -17    3.44    3.03
  13   9  16    8.71    3.35
  13   4 -16    5.43    3.23
  13   9  15    7.03    3.30
  13   4 -15    8.60    3.21
  13   9  14    5.36    3.07
  13   4 -14    2.44    2.79
  13   9  13   19.74    3.84
  13   4 -13   16.46    3.62
  13   9  12  104.67    6.26
  13   4 -12  100.19    6.19
  13   9  11   18.06    3.73
  13   4 -11   15.01    3.44
  13   9  10   32.92    4.46
  13   4 -10   33.01    4.29
  13   9   9  168.16    7.37
  13   4  -9  166.95    6.73
  13   4  -9  148.49    6.89
  13   9   8    2.47    2.76
  13   4  -8    6.63    2.82
  13   4  -8    4.85    2.57
  13   9   7    3.58    2.89
  13   4  -7    4.66    2.74
  13   4  -7    4.23    2.55
  13   9   6    4.84    2.92
  13   4  -6    7.69    2.90
  13   4  -6    3.79    2.44
  13   9   5   82.30    5.48
  13   4  -5   90.70    5.55
  13   4  -5   68.50    5.04
  13   9   4  108.83    6.07
  13   4  -4  109.28    5.96
  13   4  -4   81.19    5.35
  13   9   3    2.97    2.79
  13   4  -3    5.26    2.88
  13   4  -3    2.44    2.34
  13   9   2   98.59    5.80
  13   4  -2   98.29    5.79
  13   9   1   24.62    3.82
  13   4  -1   24.74    3.87
  13   9   0    0.07    2.45
  13   4   0   -0.17    2.58
  13   9  -1   46.60    4.49
  13   4   1   49.41    4.73
  13   9  -2    1.72    2.54
  13   4   2   -1.35    2.62
  13   9  -3   42.44    4.37
  13   9  -3   36.42    4.01
  13   4   3   37.34    4.52
  13   9  -4    8.69    2.91
  13   9  -4    3.31    2.28
  13   4   4    6.07    3.05
  13   9  -5   11.40    3.09
  13   9  -5    8.52    2.57
  13   4   5    8.09    3.12
  13   9  -6    6.68    2.84
  13   9  -6    6.50    2.44
  13   4   6    3.89    2.83
  13   9  -7   34.86    4.20
  13   9  -7   30.29    3.75
  13   4   7   31.97    4.39
  13   9  -8   45.67    4.45
  13   9  -8   39.12    4.20
  13   4   8   40.29    4.74
  13   9  -9   24.80    3.73
  13   9  -9   19.39    3.32
  13   4   9   23.40    4.09
  13   9 -10    3.71    2.55
  13   9 -10   -0.48    2.24
  13   4  10    2.55    2.96
  13   9 -11   39.80    4.29
  13   9 -11   44.84    4.55
  13   4  11   40.69    4.83
  13   9 -12    7.31    2.76
  13   4  12    9.75    3.47
  13   9 -13   21.69    3.78
  13   4  13   25.21    4.35
  13   9 -14   -1.22    2.31
  13   4  14   -1.28    2.85
  13   9 -15    4.71    2.86
  13   4  15    3.91    3.20
  13   9 -16   -0.91    2.43
  13   4  16   -1.24    3.01
  13   9 -17   21.99    4.03
  13   4  17   15.70    4.00
  13   9 -18   19.54    4.00
  13   4  18   19.70    4.27
  13   9 -19    7.21    3.30
  15   5 -14    0.87    2.97
  15   5 -13   20.78    4.45
  15   5 -12   31.84    4.74
  15   5 -11   57.51    5.65
  15  10  10   10.51    3.70
  15   5 -10    7.99    3.32
  15  10   9   43.11    5.12
  15   5  -9   36.55    4.77
  15  10   8   15.60    3.92
  15   5  -8   13.32    3.47
  15   5  -8   14.29    3.60
  15  10   7    3.16    3.05
  15   5  -7    1.61    2.85
  15   5  -7    2.91    2.69
  15  10   6   33.74    4.69
  15   5  -6   32.54    4.47
  15   5  -6   26.31    4.13
  15  10   5   43.88    4.97
  15   5  -5   39.84    4.76
  15   5  -5   30.77    4.44
  15  10   4    1.44    2.81
  15   5  -4    1.65    2.88
  15   5  -4   -1.53    2.25
  15  10   3   59.90    5.32
  15   5  -3   77.86    5.88
  15   5  -3   54.20    5.00
  15  10   2   60.72    5.37
  15   5  -2   66.30    5.55
  15   5  -2   46.40    5.02
  15  10   1   17.45    3.82
  15   5  -1   16.36    3.71
  15   5  -1   11.73    3.29
  15  10   0   30.02    4.45
  15   5   0   22.21    4.12
  15  10  -1    0.07    2.65
  15   5   1    0.79    2.98
  15  10  -2    4.75    2.99
  15   5   2    4.40    3.12
  15  10  -3   12.63    3.46
  15   5   3   11.74    3.69
  15  10  -4    4.68    3.00
  15   5   4    1.85    2.96
  15  10  -5    1.35    2.75
  15   5   5    1.27    2.86
  15  10  -6    2.44    2.88
  15   5   6    2.97    3.04
  15  10  -7    0.52    2.63
  15   5   7    0.13    2.89
  15  10  -8    7.60    3.10
  15   5   8    6.62    3.47
  15  10  -9   36.22    4.71
  15   5   9   35.09    4.94
  15  10 -10    8.77    3.19
  17   6   0    5.99    3.30
   0  -3 -30   88.08    6.30
   0  -3 -29    1.56    2.50
   0  -3 -28   18.50    3.57
   0  -3 -27    0.90    2.25
   0  -3 -26   51.90    4.66
   0  -3 -25   -0.43    1.91
   0  -3 -24    0.03    1.95
   0  -3 -24    1.57    2.14
   0  -3 -23   -0.63    1.86
   0  -3 -23   -0.74    1.88
   0  -3 -22    6.32    2.33
   0  -3 -22    2.55    2.09
   0  -3 -21   -0.94    1.71
   0  -3 -21    1.74    1.92
   0  -3 -20    4.85    2.09
   0  -3 -20    2.00    2.02
   0  -3 -19    0.56    1.82
   0  -3 -19    0.46    1.83
   0  -3 -18   54.16    3.99
   0  -3 -18   28.02    3.08
   0  -3 -17    1.20    1.67
   0  -3 -17   -1.19    1.57
   0  -3 -16   37.21    3.32
   0  -3 -16   21.44    2.71
   0  -3 -15    0.26    1.41
   0  -3 -14  220.66    5.60
   0  -3 -13   -0.10    1.16
   0  -3 -12  135.54    4.20
   0  -3 -11   -0.83    0.93
   0  -3 -10  161.50    4.03
   0  -3  -9    0.94    0.88
   0  -3  -8   31.98    2.04
   0  -3  -7   -0.01    0.73
   0   3   6    1.18    0.52
   0  -3  -6    1.47    0.79
   0   3   5   -0.49    0.57
   0  -3  -5    0.77    0.73
   0   3   4   25.40    1.23
   0  -3  -4   54.97    1.81
   0   3   3   -0.10    0.60
   0  -3  -3   -0.44    0.76
   0   3   2    0.11    0.58
   0  -3  -2    0.13    0.63
   0   3   1   -0.29    0.55
   0   3   0   70.33    1.80
   0   3  -1    0.11    0.12
   0   3  -3   -0.29    0.75
   0   3  -3   -0.04    0.55
   0   3  -4   11.46    1.23
   0   3  -4   21.29    1.59
   0   3  -5   -0.03    0.80
   0   3  -5    0.21    0.65
   0   3  -6  153.62    3.17
   0   3  -6  264.48    4.17
   0   3  -7   -0.03    0.78
   0   3  -7    0.03    0.49
   0   3  -8   39.22    2.03
   0   3  -8   30.17    1.91
   0   3  -9    0.84    0.84
   0   3  -9    0.37    0.79
   0   3 -10  267.11    4.45
   0   3 -10  313.88    5.73
   0   3 -11    0.25    0.87
   0   3 -11   -0.21    0.93
   0   3 -12   20.70    1.92
   0   3 -12   18.76    2.31
   0   3 -13    0.37    0.98
   0   3 -13    0.14    1.09
   0   3 -14   29.03    2.24
   0   3 -14   29.58    2.84
   0   3 -15   -0.91    1.07
   0   3 -15    0.28    1.27
   0   3 -16  116.35    3.69
   0   3 -16  102.21    4.39
   0   3 -17   -0.85    1.46
   0   3 -18    1.39    1.78
   0   3 -19   -0.15    1.73
   0   3 -20   66.05    4.42
   0   3 -21   -0.42    1.59
   0   3 -22    1.15    1.77
   0   3 -23   -0.20    1.78
   0   3 -24   76.89    5.24
   0   3 -25    1.49    2.11
   0   3 -26    8.52    2.72
   0   3 -27   -0.15    2.15
   0   3 -28   23.14    3.97
   0   3 -29   -0.76    2.35
   0   3 -30   20.95    4.03
  -2  -4 -30    0.47    2.34
   2  -2 -30   -0.02    2.52
  -2  -4 -29    5.67    2.78
   2  -2 -29    2.26    2.66
  -2  -4 -28    3.19    2.47
   2  -2 -28    7.28    2.96
  -2  -4 -27    3.04    2.39
   2  -2 -27    0.48    2.31
  -2  -4 -26   18.97    3.32
   2  -2 -26   21.65    3.68
   2  -2 -26   12.14    3.18
  -2  -4 -25   54.31    4.60
   2  -2 -25   69.58    5.17
  -2  -4 -24   52.64    4.40
   2  -2 -24   55.17    4.63
  -2  -4 -23    0.72    1.92
  -2  -4 -23    0.08    2.07
   2  -2 -23    2.92    2.18
  -2  -4 -22    7.92    2.35
  -2  -4 -22    4.74    2.23
   2  -2 -22   11.14    2.67
  -2  -4 -21   37.36    3.70
  -2  -4 -21   16.00    2.68
   2  -2 -21   44.15    4.02
  -2  -4 -20  130.01    5.49
  -2  -4 -20   53.15    4.19
   2  -2 -20  147.82    6.05
  -2  -4 -19    2.60    1.83
  -2  -4 -19    0.83    1.88
   2  -2 -19    3.12    2.01
  -2  -4 -18   56.13    3.96
  -2  -4 -18   24.99    2.91
   2  -2 -18   66.80    4.38
  -2  -4 -17    0.96    1.59
  -2  -4 -17    1.81    1.75
   2  -2 -17   -0.38    1.64
  -2  -4 -16   35.33    3.14
  -2  -4 -16   14.69    2.27
   2  -2 -16   40.34    3.60
  -2  -4 -15    5.52    1.67
  -2  -4 -15    2.05    1.54
   2  -2 -15    7.36    1.96
  -2  -4 -14   24.29    2.55
  -2  -4 -14   10.55    1.86
   2  -2 -14   31.81    2.98
   2   4  13    4.23    1.07
  -2  -4 -13    3.15    1.24
  -2  -4 -13    0.44    1.24
   2  -2 -13    4.09    1.52
   2   4  12  191.45    3.37
  -2  -4 -12  122.38    3.91
  -2  -4 -12   42.61    2.94
   2  -2 -12  155.02    4.71
   2   4  11    9.75    1.23
  -2  -4 -11    5.63    1.30
  -2  -4 -11    1.31    1.16
   2  -2 -11    8.74    1.65
   2   4  10   81.49    2.42
  -2  -4 -10   53.05    2.58
  -2  -4 -10   18.45    2.27
   2  -2 -10   57.96    2.94
   2   4   9   50.77    2.07
  -2  -4  -9   34.79    2.09
  -2  -4  -9   14.67    1.71
   2  -2  -9   37.30    2.41
   2   4   8  425.74    4.59
  -2  -4  -8  275.64    4.40
  -2  -4  -8   92.20    3.17
   2  -2  -8  330.96    5.41
   2   4   7    4.64    1.04
  -2  -4  -7    3.65    0.88
  -2  -4  -7   -0.02    0.52
   2  -2  -7    4.24    1.10
   2   4   6  491.18    4.87
  -2  -4  -6  314.66    3.97
  -2  -4  -6   50.38    2.13
   2  -2  -6  479.66    3.57
   2  -2  -6  375.76    5.25
   2   4   5   20.42    1.76
  -2  -4  -5   12.66    1.23
  -2  -4  -5    5.04    0.88
   2  -2  -5   20.33    1.39
   2  -2  -5   16.93    1.71
   2   4   4   53.81    2.14
  -2  -4  -4   -0.06    0.22
   2  -2  -4   56.33    1.88
   2  -2  -4   42.29    2.13
   2   4   3    0.59    0.98
  -2  -4  -3   -0.01    0.14
   2  -2  -3    1.77    0.94
   2  -2  -3    1.52    0.85
  -2   2   2   81.41    2.17
   2   4   2   83.04    2.51
  -2  -4  -2   53.67    2.23
  -2   2   1    9.06    1.11
   2   4   1    9.10    1.25
  -2  -4  -1    7.78    1.13
  -2   2   0   52.87    1.96
   2   4   0    0.15    0.14
  -2  -4   0   44.66    2.15
  -2   2  -1    0.87    0.67
   2   4  -1    0.73    0.83
  -2  -4   1    2.35    0.93
  -2   2  -2    0.05    0.19
  -2   2  -2  118.82    2.66
   2   4  -2  294.40    4.12
  -2   2  -3   10.68    1.30
  -2   2  -3    6.48    1.00
   2   4  -3    7.97    1.21
   2   4  -3    9.03    0.95
  -2   2  -4   17.66    1.69
  -2   2  -4    3.23    0.65
   2   4  -4   14.54    1.68
   2   4  -4   16.99    1.54
  -2   2  -5    0.14    0.93
  -2   2  -5    0.17    0.22
   2   4  -5    0.38    0.88
   2   4  -5    0.81    0.71
  -2   2  -6    0.63    0.93
  -2   2  -6    0.10    0.22
   2   4  -6    0.20    0.86
   2   4  -6    0.72    0.75
  -2   2  -7    0.79    1.00
  -2   2  -7   -0.20    0.23
   2   4  -7    0.00    0.80
   2   4  -7    0.75    0.72
  -2   2  -8   38.01    2.24
  -2   2  -8    1.35    0.52
   2   4  -8   13.25    1.58
   2   4  -8   24.95    1.93
  -2   2  -9   25.71    2.11
  -2   2  -9   11.44    1.34
   2   4  -9    7.18    1.16
   2   4  -9   22.74    2.13
  -2   2 -10   23.82    2.15
  -2   2 -10   13.42    1.46
   2   4 -10    6.33    1.17
   2   4 -10   22.24    2.18
  -2   2 -11   11.21    1.59
  -2   2 -11    0.23    0.30
  -2   2 -11    4.90    0.82
   2   4 -11    2.73    1.03
   2   4 -11   11.44    1.77
  -2   2 -12   32.35    2.38
  -2   2 -12    0.16    0.27
  -2   2 -12   15.50    1.59
   2   4 -12   11.32    1.43
   2   4 -12   32.39    2.70
  -2   2 -13    1.19    1.23
  -2   2 -13    0.21    0.25
  -2   2 -13    0.61    0.78
   2   4 -13    0.61    1.00
   2   4 -13    1.14    1.26
  -2   2 -14    0.55    0.39
   2   4 -14   15.95    1.72
   2   4 -14   26.30    2.80
   2  -2  14   29.09    2.85
  -2   2 -15    0.33    0.35
   2   4 -15   16.43    1.76
   2   4 -15   24.02    2.92
   2  -2  15   28.70    3.00
  -2   2 -16    0.82    0.55
   2   4 -16   88.43    4.46
   2  -2  16  107.46    4.18
  -2   2 -17   -0.58    1.47
   2   4 -17    0.44    1.63
   2  -2  17    0.66    1.72
  -2   2 -18   -0.88    1.57
   2   4 -18   -1.07    1.66
  -2   2 -19    1.04    1.70
   2   4 -19    1.81    1.80
  -2   2 -20   60.26    4.32
   2   4 -20   66.16    4.49
  -2   2 -21    3.92    2.03
   2   4 -21    4.51    2.09
  -2   2 -22  132.94    6.14
   2   4 -22  147.29    6.46
  -2   2 -23    8.29    2.52
   2   4 -23   10.98    2.71
  -2   2 -24   -0.24    1.89
   2   4 -24    2.66    2.19
  -2   2 -25   35.01    4.13
   2   4 -25   49.03    4.67
  -2   2 -26  102.28    6.10
   2   4 -26  113.41    6.44
  -2   2 -27    8.32    2.81
   2   4 -27   10.91    3.04
  -2   2 -28    9.88    3.18
   2   4 -28   14.03    3.42
  -2   2 -29   10.06    3.23
   2   4 -29   10.12    3.25
  -4  -5 -29    7.09    2.89
   4  -1 -29   14.87    3.76
  -4  -5 -28   10.53    2.97
   4  -1 -28   15.35    3.73
  -4  -5 -27   36.29    4.29
   4  -1 -27   53.02    5.18
  -4  -5 -26    9.66    2.75
   4  -1 -26   12.57    3.27
  -4  -5 -25    1.05    2.01
   4  -1 -25    1.67    2.33
  -4  -5 -24    1.10    1.93
   4  -1 -24    2.33    2.33
  -4  -5 -23    1.46    1.94
   4  -1 -23    0.16    2.17
  -4  -5 -22    2.08    1.88
   4  -1 -22    2.25    2.21
  -4  -5 -21   -2.27    1.43
  -4  -5 -21   -0.80    1.88
   4  -1 -21   -0.18    1.99
  -4  -5 -20    0.99    1.65
  -4  -5 -20    0.67    1.83
   4  -1 -20    2.57    2.06
  -4  -5 -19   28.16    3.22
  -4  -5 -19   15.06    2.61
   4  -1 -19   39.63    3.91
  -4  -5 -18   12.19    2.36
  -4  -5 -18    9.69    2.30
   4  -1 -18   20.97    3.12
  -4  -5 -17   23.46    2.85
  -4  -5 -17   16.33    2.66
   4  -1 -17   37.33    3.84
  -4  -5 -16   14.75    2.34
  -4  -5 -16   11.53    2.25
   4  -1 -16   18.82    2.84
  -4  -5 -15    9.27    1.97
  -4  -5 -15    5.29    1.83
   4  -1 -15   13.90    2.48
   4   5  14  128.24    3.99
  -4  -5 -14   66.81    3.55
  -4  -5 -14   53.56    3.70
   4  -1 -14  100.12    4.68
   4   5  13   88.32    3.46
  -4  -5 -13   47.37    2.99
  -4  -5 -13   39.91    3.25
   4  -1 -13   74.29    4.02
   4   5  12  160.55    4.20
  -4  -5 -12   88.64    3.51
  -4  -5 -12   74.79    3.75
   4  -1 -12  130.88    4.77
   4   5  11  389.03    5.98
  -4  -5 -11  200.90    4.68
  -4  -5 -11  180.54    4.93
   4  -1 -11  345.08    3.82
   4  -1 -11  307.72    6.55
   4   5  10  237.55    4.69
  -4  -5 -10  131.36    3.70
  -4  -5 -10  138.42    4.32
   4  -1 -10  255.81    3.52
   4  -1 -10  217.29    5.41
   4   5   9    2.99    1.17
  -4  -5  -9    2.36    0.98
  -4  -5  -9    2.81    1.27
   4  -1  -9    4.57    1.06
   4  -1  -9    5.75    1.48
  -4  -5  -8  114.48    3.13
  -4  -5  -8  151.65    4.26
   4  -1  -8  248.66    3.75
   4  -1  -8  193.90    4.81
   4   5   7   -0.37    0.63
  -4  -5  -7    7.72    1.12
  -4  -5  -7   11.38    1.61
   4  -1  -7   21.80    1.79
   4  -1  -7   16.52    1.86
   4   5   6   -0.18    0.56
  -4  -5  -6   -0.04    0.62
  -4  -5  -6    0.62    1.02
   4  -1  -6    0.75    0.94
   4  -1  -6    1.07    0.95
   4   5   5    0.12    0.58
  -4  -5  -5    0.28    0.60
  -4  -5  -5    0.05    0.98
   4  -1  -5    0.99    0.99
   4  -1  -5    0.27    0.86
   4   5   4    0.04    0.58
  -4  -5  -4   33.73    1.48
  -4  -5  -4   55.39    2.58
   4  -1  -4  127.31    3.16
   4  -1  -4   82.00    3.00
   4   5   3    0.20    0.57
  -4  -5  -3   -0.08    0.38
   4  -1  -3   50.44    2.47
   4   5   2    0.00    0.49
  -4  -5  -2    0.35    0.34
   4  -1  -2    4.36    1.26
   4   5   1    0.33    0.37
  -4  -5  -1    0.05    0.18
   4  -1  -1   14.79    1.66
   4   5   0    0.31    0.24
   4  -1   0  296.23    4.90
   4   5  -1  304.61    5.05
   4   5  -1  254.44    3.39
   4  -1   1  319.40    5.15
   4   5  -2    9.25    1.49
   4   5  -2    8.66    1.01
   4  -1   2    9.38    1.52
   4   5  -3   21.11    2.12
   4   5  -3   18.49    1.60
   4  -1   3   -0.04    0.25
   4   5  -4   31.28    2.32
   4   5  -4   27.91    1.80
   4  -1   4   -0.28    0.49
  -4   1  -5   11.18    1.42
   4   5  -5   23.41    2.11
   4   5  -5   22.06    1.77
   4  -1   5   26.06    2.29
  -4   1  -6   23.22    1.92
   4   5  -6   42.98    2.49
   4   5  -6    1.88    0.64
   4  -1   6   44.07    2.67
  -4   1  -7   69.72    2.97
   4   5  -7  121.85    3.53
   4   5  -7  130.21    3.59
   4  -1   7  133.58    4.04
  -4   1  -8  101.86    3.55
   4   5  -8  160.15    3.94
   4   5  -8  172.54    4.29
   4  -1   8  181.47    4.63
  -4   1  -9    0.47    0.98
   4   5  -9    1.56    1.11
   4   5  -9    0.85    1.09
   4  -1   9    0.73    1.39
  -4   1 -10  158.90    4.64
  -4   1 -10  255.76    3.67
   4   5 -10  183.87    4.24
   4   5 -10  236.70    5.37
   4  -1  10  260.13    5.63
  -4   1 -11    3.69    1.36
  -4   1 -11    7.12    1.08
   4   5 -11    3.86    1.23
   4   5 -11    7.20    1.61
   4  -1  11    8.27    1.85
  -4   1 -12   10.29    1.86
   4   5 -12   10.63    1.57
   4   5 -12   19.30    2.34
   4  -1  12   16.79    2.28
  -4   1 -13   20.74    2.57
   4   5 -13   13.42    1.76
   4   5 -13   28.35    3.05
   4  -1  13   37.80    3.20
  -4   1 -14    7.43    1.79
   4   5 -14    5.52    1.42
   4   5 -14   19.27    2.59
   4  -1  14   16.59    2.49
  -4   1 -15   17.58    2.53
   4   5 -15    7.03    1.51
   4   5 -15   22.87    2.85
   4  -1  15   28.50    3.34
  -4   1 -16   11.82    2.32
   4   5 -16   20.82    2.86
   4  -1  16   25.89    2.94
  -4   1 -17    3.29    1.92
   4   5 -17    6.98    2.23
   4  -1  17    6.12    2.28
  -4   1 -18    0.28    1.65
   4   5 -18    1.67    1.89
   4  -1  18    2.54    2.11
  -4   1 -19    1.90    1.84
   4   5 -19    2.25    1.96
  -4   1 -20   49.66    4.08
   4   5 -20   65.20    4.59
  -4   1 -21   14.77    2.80
   4   5 -21   23.29    3.36
  -4   1 -22    8.45    2.49
   4   5 -22   20.32    3.37
  -4   1 -23   11.82    2.79
   4   5 -23   12.96    3.00
  -4   1 -24   14.91    3.22
   4   5 -24   20.38    3.54
  -4   1 -25    0.05    2.06
   4   5 -25    4.71    2.47
  -4   1 -26   12.59    3.25
   4   5 -26    9.14    3.07
  -4   1 -27    8.32    2.92
   4   5 -27   13.92    3.37
  -4   1 -28   22.70    4.01
   4   5 -28   30.70    4.53
  -4   1 -29    0.93    2.41
   4   5 -29    2.10    2.68
  -6  -6 -28   -0.24    2.12
   6   0 -28    2.66    2.85
  -6  -6 -27   11.07    2.96
   6   0 -27   18.98    3.92
  -6  -6 -26    3.05    2.22
   6   0 -26    6.36    2.97
  -6  -6 -25  110.90    6.00
   6   0 -25  213.50    8.63
  -6  -6 -24    6.40    2.39
   6   0 -24   16.15    3.52
  -6  -6 -23    0.93    1.83
   6   0 -23    2.98    2.44
  -6  -6 -22   21.07    3.11
   6   0 -22   45.70    4.53
  -6  -6 -21   92.04    5.02
   6   0 -21  191.95    7.48
  -6  -6 -20   26.52    3.23
   6   0 -20   52.42    4.48
  -6  -6 -19    3.93    1.87
  -6  -6 -19    3.21    2.14
   6   0 -19    5.85    2.34
  -6  -6 -18   11.39    2.28
  -6  -6 -18   15.02    2.65
   6   0 -18   16.32    2.99
  -6  -6 -17    7.73    1.94
  -6  -6 -17    4.79    2.20
   6   0 -17    7.29    2.30
  -6  -6 -16    5.51    1.84
  -6  -6 -16    7.38    2.25
   6   0 -16    9.08    2.50
   6   6  15   25.54    2.90
  -6  -6 -15   10.41    2.05
  -6  -6 -15   18.03    2.75
   6   0 -15   25.72    3.29
   6   6  14   17.28    2.59
  -6  -6 -14    6.41    1.73
  -6  -6 -14   13.72    2.50
   6   0 -14   11.67    2.38
   6   6  13   25.49    3.14
  -6  -6 -13    7.78    1.74
  -6  -6 -13   17.09    2.51
   6   0 -13   -0.03    0.68
   6   6  12    2.31    1.88
  -6  -6 -12    1.12    1.23
  -6  -6 -12    0.17    1.64
   6   0 -12   -0.14    0.49
   6   6  11    7.41    2.07
  -6  -6 -11    2.11    1.23
  -6  -6 -11    7.30    1.97
   6   0 -11    6.84    1.55
   6   0 -11    0.02    0.50
   6   6  10   73.57    3.84
  -6  -6 -10   20.56    2.09
  -6  -6 -10   51.45    3.63
   6   0 -10   74.77    3.17
   6   0 -10    0.01    0.46
   6   6   9  384.99    7.07
  -6  -6  -9  100.49    3.42
  -6  -6  -9  297.46    6.48
   6   0  -9  391.20    5.92
   6   0  -9  252.84    6.03
   6   6   8  187.99    5.13
  -6  -6  -8   52.33    2.52
  -6  -6  -8  144.96    4.71
   6   0  -8  180.48    4.32
   6   0  -8  149.53    4.75
   6   6   7    7.35    1.86
  -6  -6  -7    2.22    0.91
  -6  -6  -7    4.70    1.63
   6   0  -7    7.98    1.64
   6   0  -7    6.78    1.62
   6   6   6   33.57    2.94
  -6  -6  -6   30.31    2.84
   6   0  -6   33.67    2.68
   6   0  -6   27.85    2.69
   6   6   5   16.00    2.21
  -6  -6  -5   13.53    1.93
   6   0  -5   18.82    2.05
   6   0  -5   11.09    1.77
   6   6   4   -1.81    1.46
  -6  -6  -4   -1.34    1.17
   6   0  -4    0.68    1.35
   6   6   3   31.72    2.83
  -6  -6  -3   31.58    2.83
   6   0  -3   35.98    2.77
   6   6   2    6.83    1.72
   6   0  -2    7.05    1.70
   6   6   1    0.61    0.46
   6   0  -1  193.73    4.79
   6   6   0   15.88    2.03
   6   0   0   14.32    2.08
   6   6  -1   49.29    3.02
   6   6  -1   37.51    2.22
   6   0   1   45.52    3.11
   6   6  -2  167.98    4.65
   6   6  -2  107.06    2.98
   6   0   2  165.84    4.77
   6   6  -3   -0.55    1.36
   6   6  -3    0.00    0.45
   6   0   3   -0.20    1.37
   6   6  -4  131.60    4.25
   6   6  -4  113.96    3.39
   6   0   4    0.98    0.66
   6   6  -5   13.52    1.98
   6   6  -5   11.56    1.59
   6   0   5   13.89    2.10
   6   6  -6   43.70    2.93
   6   6  -6   36.22    2.57
   6   0   6   46.00    3.26
  -6   0  -7    1.95    1.16
   6   6  -7    7.84    1.72
   6   6  -7    7.25    1.50
   6   0   7    8.40    2.05
  -6   0  -8    9.06    1.65
   6   6  -8   22.58    2.59
   6   6  -8   25.31    2.52
   6   0   8   27.28    3.14
  -6   0  -9   67.14    3.45
   6   6  -9  135.58    4.31
   6   6  -9  138.65    4.45
   6   0   9  155.44    5.17
  -6   0 -10    5.26    1.58
   6   6 -10   11.61    1.93
   6   6 -10   13.22    2.08
   6   0  10   16.79    2.58
  -6   0 -11   39.23    3.09
   6   6 -11   67.34    3.46
   6   6 -11   71.05    3.80
   6   0  11   79.45    4.29
  -6   0 -12   16.00    2.34
   6   6 -12   29.94    2.78
   6   6 -12   36.99    3.36
   6   0  12   32.74    3.59
  -6   0 -13   26.95    2.99
   6   6 -13   34.16    2.83
   6   6 -13   46.40    3.72
   6   0  13   49.40    3.94
  -6   0 -14    3.52    1.77
   6   6 -14    5.16    1.63
   6   6 -14    4.30    2.00
   6   0  14    9.56    2.55
  -6   0 -15   33.62    3.41
   6   6 -15   53.78    4.09
   6   0  15   61.60    4.29
  -6   0 -16   53.84    4.02
   6   6 -16   85.55    4.85
   6   0  16  102.45    5.06
  -6   0 -17    0.64    1.63
   6   6 -17    3.36    2.00
   6   0  17    3.07    2.30
  -6   0 -18    5.36    2.10
   6   6 -18   11.37    2.61
   6   0  18    9.98    2.61
  -6   0 -19    0.34    1.67
   6   6 -19    1.38    1.96
  -6   0 -20   26.13    3.58
   6   6 -20   45.55    4.29
  -6   0 -21    6.05    2.36
   6   6 -21    8.17    2.69
  -6   0 -22   25.92    3.63
   6   6 -22   39.98    4.32
  -6   0 -23   22.72    3.57
   6   6 -23   36.42    4.34
  -6   0 -24    2.74    2.31
   6   6 -24    4.53    2.59
  -6   0 -25   73.36    5.42
   6   6 -25  104.23    6.40
  -6   0 -26    1.99    2.32
   6   6 -26    5.30    2.80
  -6   0 -27    9.48    3.03
   6   6 -27   16.11    3.66
  -6   0 -28    8.51    3.08
   6   6 -28   18.31    4.00
   8   1 -26   12.74    3.64
   8   1 -25    0.58    2.70
  -8  -7 -24    2.28    2.00
   8   1 -24    0.63    2.58
  -8  -7 -23    1.14    1.92
   8   1 -23    3.08    2.70
  -8  -7 -22    5.52    2.19
   8   1 -22   10.63    3.13
  -8  -7 -21    2.08    1.80
   8   1 -21    0.85    2.27
  -8  -7 -20   18.90    3.05
   8   1 -20   45.19    4.64
  -8  -7 -19    0.15    1.53
   8   1 -19    3.78    2.35
  -8  -7 -18    4.97    1.88
  -8  -7 -18    8.87    2.61
   8   1 -18    5.79    2.45
  -8  -7 -17    3.79    1.71
  -8  -7 -17   12.14    2.81
   8   1 -17   13.34    2.96
   8   7  16  142.11    5.65
  -8  -7 -16   34.60    3.10
  -8  -7 -16  121.16    5.54
   8   1 -16  112.74    5.70
   8   7  15    5.05    2.44
  -8  -7 -15    1.86    1.46
  -8  -7 -15    7.21    2.33
   8   1 -15    8.34    2.47
   8   7  14   40.67    3.87
  -8  -7 -14   10.34    2.00
  -8  -7 -14   41.88    4.10
   8   1 -14   39.69    3.99
   8   7  13   71.21    4.50
  -8  -7 -13   17.97    2.37
  -8  -7 -13   58.67    4.38
   8   1 -13   60.20    4.54
   8   7  12   18.20    3.04
  -8  -7 -12    3.83    1.54
  -8  -7 -12   12.57    2.66
   8   1 -12   14.72    2.81
   8   7  11  321.86    7.68
  -8  -7 -11   92.56    3.90
  -8  -7 -11  279.13    7.27
   8   1 -11  271.51    7.62
   8   7  10   -1.74    2.09
  -8  -7 -10   -0.84    1.85
   8   1 -10    0.88    1.78
   8   1 -10    1.88    1.96
   8   7   9    0.59    2.10
  -8  -7  -9    1.48    1.88
   8   1  -9    1.23    1.81
   8   1  -9    1.41    1.80
   8   7   8   90.40    4.73
  -8  -7  -8   72.07    4.31
   8   1  -8   83.94    4.11
   8   1  -8   70.32    4.40
   8   7   7   37.75    3.81
  -8  -7  -7   36.98    3.63
   8   1  -7   38.25    3.39
   8   1  -7   30.88    3.49
   8   7   6    1.70    2.08
   8   1  -6    1.51    1.90
   8   1  -6    1.65    1.64
   8   7   5    7.93    2.34
   8   1  -5    8.88    2.20
   8   1  -5    5.08    1.91
   8   7   4  218.59    6.28
   8   1  -4  209.49    5.71
   8   7   3    8.96    2.30
   8   1  -3   12.35    2.38
   8   1  -2   78.37    4.12
   8   7   1    0.48    0.57
   8   1  -1   -1.27    1.83
   8   7   0   18.31    2.58
   8   1   0   16.13    2.58
   8   7  -1  250.45    6.38
   8   7  -1  210.62    5.05
   8   1   1  252.70    6.45
   8   7  -2  137.74    5.05
   8   7  -2  125.42    4.07
   8   1   2  144.41    5.30
   8   7  -3   58.73    3.83
   8   7  -3   54.35    3.15
   8   7  -4   14.95    2.51
   8   7  -4   13.45    1.97
   8   1   4   -0.48    0.49
   8   7  -5  187.23    5.72
   8   7  -5  169.14    4.88
   8   1   5   -0.04    0.65
   8   7  -6   48.16    3.67
   8   7  -6   40.19    3.23
   8   1   6   49.55    3.76
   8   7  -7   33.04    3.33
   8   7  -7   30.87    3.10
   8   1   7   37.60    3.92
   8   7  -8  241.42    6.29
   8   7  -8  226.29    5.96
   8   1   8  257.95    7.14
   8   7  -9   62.02    3.87
   8   7  -9   60.08    3.82
   8   1   9   63.14    4.52
   8   7 -10   46.98    3.59
   8   7 -10   40.68    3.57
   8   1  10   49.76    4.33
  -8  -1 -11   12.30    2.23
   8   7 -11   23.59    2.81
   8   7 -11   29.11    3.41
   8   1  11   31.98    3.68
  -8  -1 -12    6.85    1.99
   8   7 -12   13.81    2.40
   8   7 -12   14.65    2.62
   8   1  12   13.33    3.05
  -8  -1 -13   21.74    2.96
   8   7 -13   41.29    3.37
   8   7 -13   44.95    3.95
   8   1  13   46.29    4.31
  -8  -1 -14    2.38    1.73
   8   7 -14    5.80    2.22
   8   1  14    4.48    2.58
  -8  -1 -15    5.83    2.03
   8   7 -15   14.13    2.76
   8   1  15   17.80    3.23
  -8  -1 -16    0.12    1.53
   8   7 -16   -0.55    1.80
   8   1  16    2.44    2.45
  -8  -1 -17   21.79    3.28
   8   7 -17   38.27    4.07
   8   1  17   39.32    4.25
  -8  -1 -18    0.84    1.74
   8   7 -18    0.80    2.04
   8   1  18    2.41    2.50
  -8  -1 -19   -0.97    1.60
   8   7 -19    3.93    2.37
   8   1  19    3.80    2.68
  -8  -1 -20    1.86    1.92
   8   7 -20    0.92    2.23
  -8  -1 -21    0.71    1.91
   8   7 -21    2.77    2.40
  -8  -1 -22    4.18    2.33
   8   7 -22    1.73    2.43
  -8  -1 -23    1.84    2.16
   8   7 -23    3.46    2.63
  -8  -1 -24    6.20    2.61
   8   7 -24    3.96    2.75
  -8  -1 -25    0.39    2.08
   8   7 -25    0.12    2.56
  -8  -1 -26    7.13    2.81
   8   7 -26   15.97    3.79
  10   2 -24  102.63    7.01
  10   2 -23    0.45    2.78
  10   2 -22  141.18    7.61
  10   2 -21   40.51    5.02
  10   2 -20   -1.64    2.29
  10   2 -19    0.46    2.43
  10   2 -18   -3.12    2.06
  10   2 -17    8.75    2.91
  10   8  16    2.36    2.62
 -10  -8 -16    4.75    2.43
  10   2 -16    5.89    2.72
  10   8  15   47.67    4.38
 -10  -8 -15   43.92    4.36
  10   2 -15   41.49    4.48
  10   8  14   24.16    3.55
 -10  -8 -14   22.43    3.29
  10   2 -14   18.66    3.30
  10   8  13    4.30    2.62
  10   2 -13   -0.55    2.07
  10   8  12    9.25    2.83
  10   2 -12    7.24    2.60
  10   8  11    3.26    2.44
  10   2 -11    4.16    2.16
  10   8  10   96.69    5.28
  10   2 -10   97.89    4.72
  10   2 -10   78.91    4.90
  10   8   9   16.46    3.17
  10   2  -9   18.51    2.89
  10   2  -9   16.51    2.89
  10   8   8   -0.41    2.41
  10   2  -8   -1.01    2.08
  10   2  -8   -0.63    1.82
  10   8   7   -0.70    2.39
  10   2  -7   -0.19    2.22
  10   2  -7    0.79    1.93
  10   8   6    0.69    2.41
  10   2  -6    0.01    2.20
  10   2  -6    1.30    1.94
  10   8   5    0.01    2.42
  10   2  -5    0.67    2.27
  10   2  -5    0.61    1.94
  10   8   4   11.58    2.91
  10   2  -4   14.94    2.96
  10   2  -4    9.89    2.59
  10   8   3   -0.75    2.23
  10   2  -3    1.52    2.36
  10   8   2   20.56    3.18
  10   2  -2   19.52    3.23
  10   8   1   19.79    3.16
  10   2  -1   22.32    3.33
  10   8   0  101.01    5.21
  10   2   0  104.00    5.35
  10   8  -1   54.74    4.27
  10   8  -1   43.50    3.55
  10   2   1   55.26    4.46
  10   8  -2   40.94    3.99
  10   8  -2   46.43    3.61
  10   2   2   46.81    4.41
  10   8  -3   80.19    4.82
  10   8  -3   74.24    4.09
  10   2   3   80.22    5.00
  10   8  -4   90.85    4.98
  10   8  -4   95.66    4.49
  10   2   4   93.49    5.32
  10   8  -5   14.16    2.89
  10   8  -5   11.54    2.32
  10   2   5   14.30    3.08
  10   8  -6    8.96    2.60
  10   8  -6    7.77    2.14
  10   2   6    8.23    2.83
  10   8  -7   29.00    3.47
  10   8  -7   27.74    3.16
  10   2   7   27.36    3.76
  10   8  -8    2.20    2.21
  10   8  -8    6.65    2.16
  10   2   8    5.24    2.79
  10   8  -9   82.12    4.63
  10   8  -9   79.64    4.57
  10   2   9   84.11    5.25
  10   8 -10   33.80    3.68
  10   8 -10   35.43    3.71
  10   2  10   38.32    4.33
  10   8 -11   14.07    2.69
  10   8 -11   19.97    2.94
  10   2  11   18.09    3.41
  10   8 -12   -0.10    1.84
  10   8 -12    1.71    1.96
  10   2  12    2.97    2.62
  10   8 -13    5.76    2.17
  10   8 -13    5.88    2.29
  10   2  13    4.56    2.70
  10   8 -14   41.17    4.16
  10   2  14   40.75    4.46
  10   8 -15   59.28    4.76
  10   2  15   65.23    5.07
  10   8 -16   12.84    2.97
  10   2  16   14.18    3.44
 -10  -2 -17    1.25    1.79
  10   8 -17   -0.34    2.15
  10   2  17   -0.17    2.67
 -10  -2 -18    0.42    1.74
  10   8 -18    2.58    2.37
  10   2  18   -2.91    2.52
 -10  -2 -19   11.96    2.85
  10   8 -19   28.41    4.14
  10   2  19   27.93    4.12
 -10  -2 -20    6.99    2.63
  10   8 -20   24.88    4.04
 -10  -2 -21    3.70    2.25
  10   8 -21    5.77    2.94
 -10  -2 -22    0.56    1.97
  10   8 -22    1.14    2.59
 -10  -2 -23   17.90    3.55
  10   8 -23   48.06    5.35
 -10  -2 -24    1.13    2.32
  10   8 -24   -0.37    2.77
  12   3 -21   19.07    4.26
  12   3 -20    9.20    3.49
  12   3 -19    7.22    3.29
  12   3 -18   21.24    4.18
  12   3 -17   67.27    5.67
  12   9  16   29.41    4.26
  12   3 -16   24.05    4.12
  12   9  15    4.03    2.90
  12   3 -15    0.53    2.40
  12   9  14   80.22    5.47
  12   3 -14   79.21    5.83
  12   9  13    4.28    2.86
  12   3 -13    5.00    2.66
  12   9  12    6.77    3.03
  12   3 -12    7.06    2.85
  12   9  11   77.23    5.34
  12   3 -11   67.95    5.16
  12   9  10   45.70    4.63
  12   3 -10   43.04    4.44
  12   9   9    8.85    3.09
  12   3  -9   10.73    2.87
  12   3  -9    6.65    2.62
  12   9   8    4.35    2.80
  12   3  -8    3.24    2.52
  12   3  -8    1.80    2.19
  12   9   7   18.86    3.51
  12   3  -7   20.66    3.31
  12   3  -7   13.26    2.97
  12   9   6    2.90    2.56
  12   3  -6    2.95    2.45
  12   3  -6   -0.04    1.97
  12   9   5   13.11    3.15
  12   3  -5   16.10    3.18
  12   3  -5    9.11    2.57
  12   9   4   33.51    4.03
  12   3  -4   42.28    4.25
  12   3  -4   29.63    3.79
  12   9   3   47.63    4.40
  12   3  -3   45.89    4.38
  12   9   2   18.85    3.36
  12   3  -2   20.02    3.41
  12   9   1   32.45    3.96
  12   3  -1   29.26    3.90
  12   9   0    0.38    2.30
  12   3   0   -0.83    2.39
  12   9  -1   25.92    3.67
  12   9  -1   22.91    3.06
  12   3   1   25.40    3.80
  12   9  -2  179.71    6.93
  12   9  -2  162.19    5.85
  12   3   2  176.24    7.03
  12   9  -3    8.48    2.82
  12   9  -3    6.64    2.15
  12   3   3    9.63    3.07
  12   9  -4   19.77    3.42
  12   9  -4   17.77    2.86
  12   3   4   20.58    3.56
  12   9  -5   80.28    5.13
  12   9  -5   79.05    4.62
  12   3   5   78.10    5.27
  12   9  -6    5.12    2.57
  12   9  -6    7.55    2.37
  12   3   6    4.80    2.75
  12   9  -7    9.24    2.72
  12   9  -7    7.86    2.48
  12   3   7    8.71    3.07
  12   9  -8   45.12    4.27
  12   9  -8   48.73    4.26
  12   3   8   43.84    4.63
  12   9  -9  159.57    6.54
  12   9  -9  166.65    6.52
  12   3   9  152.99    6.98
  12   9 -10   52.52    4.45
  12   9 -10   52.49    4.47
  12   3  10   55.00    5.03
  12   9 -11   60.13    4.68
  12   9 -11   51.53    4.53
  12   3  11   49.42    4.89
  12   9 -12  126.29    5.94
  12   9 -12  119.90    5.96
  12   3  12  119.13    6.50
  12   9 -13   15.73    3.16
  12   3  13   15.61    3.67
  12   9 -14   21.94    3.57
  12   3  14   23.38    4.16
  12   9 -15   12.50    3.17
  12   3  15    5.11    3.15
  12   9 -16    6.63    2.83
  12   3  16    2.50    3.09
  12   9 -17   19.41    3.73
  12   3  17   13.38    3.81
  12   9 -18   -1.47    2.38
  12   3  18    0.36    3.04
  12   9 -19    7.67    3.22
  12   3  19    5.37    3.52
  12   9 -20    8.71    3.34
  12   9 -21   32.44    4.78
  14   4 -17   17.44    4.20
  14  10  16    4.88    3.13
  14   4 -16   -0.16    2.90
  14  10  15   48.63    5.21
  14   4 -15   33.33    4.87
  14  10  14   28.72    4.59
  14   4 -14   27.82    4.64
  14  10  13   16.74    3.91
  14   4 -13   21.68    4.13
  14  10  12   -0.31    2.78
  14   4 -12   -1.80    2.51
  14  10  11    7.52    3.25
  14   4 -11    4.11    2.84
  14  10  10   33.35    4.65
  14   4 -10   29.73    4.25
  14  10   9   32.12    4.51
  14   4  -9   30.43    4.39
  14  10   8    9.84    3.36
  14   4  -8    5.77    2.92
  14   4  -8    4.31    2.67
  14  10   7   -0.95    2.58
  14   4  -7   -0.29    2.50
  14   4  -7    3.00    2.43
  14  10   6    3.34    2.84
  14   4  -6   -0.55    2.59
  14   4  -6    2.32    2.39
  14  10   5   10.37    3.32
  14   4  -5    8.52    3.14
  14   4  -5    6.11    2.63
  14  10   4   16.84    3.64
  14   4  -4   18.67    3.72
  14   4  -4   10.49    2.94
  14  10   3    1.82    2.57
  14   4  -3    1.10    2.81
  14   4  -3   -0.43    2.19
  14  10   2   20.71    3.78
  14   4  -2   18.97    3.73
  14   4  -2   18.37    3.50
  14  10   1   17.69    3.62
  14   4  -1   10.78    3.37
  14  10   0  164.01    7.32
  14   4   0  162.03    7.35
  14  10  -1   28.29    4.12
  14   4   1   27.40    4.20
  14  10  -2   18.86    3.67
  14   4   2   11.44    3.43
  14  10  -3  220.46    8.23
  14   4   3  213.49    8.33
  14  10  -4    1.43    2.61
  14   4   4    1.41    2.85
  14  10  -5   42.33    4.63
  14   4   5   44.64    4.89
  14  10  -6   10.30    3.23
  14   4   6   10.05    3.48
  14  10  -7   49.74    4.82
  14   4   7   43.45    4.95
  14  10  -8   11.26    3.15
  14   4   8    8.07    3.40
  14  10  -9   20.33    3.75
  14   4   9   21.97    4.31
  14  10 -10   65.96    5.26
  14   4  10   75.03    5.98
  14  10 -11    2.52    2.70
  14   4  11   -0.11    3.03
  14   4  12    2.39    3.16
  14   4  13    3.99    3.38
  14   4  14    5.37    3.61
  16   5 -10   70.71    6.25
  16   5  -9   26.06    4.49
  16   5  -8   22.23    4.28
  16   5  -7    2.92    3.17
  16   5  -7   -0.01    2.73
  16   5  -6    3.49    3.20
  16   5  -6   -0.64    2.57
  16   5  -5    1.50    2.99
  16   5  -5   -0.30    2.52
  16   5  -4   34.80    4.91
  16   5  -4   23.60    4.20
  16   5  -3    8.14    3.62
  16   5  -3    9.18    3.29
  16   5  -2    3.90    3.33
  16   5  -2    5.24    2.90
  16   5  -1    4.75    3.26
  16   5  -1    1.42    2.70
  -1  -4 -30    9.83    3.17
   1  -3 -30    6.32    3.10
  -1  -4 -29    1.78    2.45
   1  -3 -29    1.82    2.55
  -1  -4 -28   17.66    3.54
   1  -3 -28   18.76    3.62
  -1  -4 -27   13.17    3.03
   1  -3 -27   16.70    3.38
  -1  -4 -26    4.27    2.34
   1  -3 -26    8.67    2.81
  -1  -4 -25   10.78    2.79
   1  -3 -25   16.37    3.20
   1  -3 -25    8.51    2.76
  -1  -4 -24   46.38    4.26
  -1  -4 -24   22.58    3.39
   1  -3 -24   47.39    4.38
   1  -3 -24   29.62    3.75
  -1  -4 -23    4.48    2.15
  -1  -4 -23    5.26    2.41
   1  -3 -23    4.15    2.26
   1  -3 -23    4.13    2.43
  -1  -4 -22   31.53    3.60
  -1  -4 -22   17.47    2.89
   1  -3 -22   42.66    4.06
   1  -3 -22   29.77    3.65
  -1  -4 -21   53.63    4.11
  -1  -4 -21   19.97    2.94
   1  -3 -21   58.07    4.30
   1  -3 -21   43.21    4.22
  -1  -4 -20  167.35    6.14
  -1  -4 -20   70.79    4.66
   1  -3 -20  190.96    6.63
  -1  -4 -19   58.74    4.13
  -1  -4 -19   21.87    2.97
   1  -3 -19   65.66    4.36
  -1  -4 -18   89.51    4.59
  -1  -4 -18   34.05    3.76
   1  -3 -18   96.07    4.81
  -1  -4 -17    5.39    1.93
  -1  -4 -17    2.80    1.77
   1  -3 -17    7.06    2.09
  -1  -4 -16   14.68    2.30
  -1  -4 -16    6.73    1.96
   1  -3 -16   18.90    2.61
  -1  -4 -15   16.72    2.32
  -1  -4 -15    4.38    1.72
   1  -3 -15   14.10    2.28
  -1  -4 -14    3.23    1.47
  -1  -4 -14    1.51    1.40
   1  -3 -14    5.15    1.72
  -1  -4 -13  101.28    3.86
  -1  -4 -13   37.30    3.03
   1  -3 -13  116.18    4.25
  -1  -4 -12    1.75    1.18
  -1  -4 -12    0.70    1.16
   1  -3 -12    1.72    1.25
  -1  -4 -11   29.76    2.33
  -1  -4 -11    9.25    1.62
   1  -3 -11   30.33    2.47
   1   4  10   14.96    1.29
  -1  -4 -10   11.80    1.54
  -1  -4 -10    3.38    1.24
   1  -3 -10   12.33    1.64
   1   4   9    0.26    0.69
  -1  -4  -9    0.27    0.81
  -1  -4  -9    0.33    0.96
   1  -3  -9   -0.18    0.87
   1   4   8    0.71    0.70
  -1  -4  -8    1.02    0.81
  -1  -4  -8    0.40    0.94
   1  -3  -8    1.03    0.89
   1   4   7  250.59    3.07
  -1  -4  -7  191.51    3.50
  -1  -4  -7   -0.01    0.44
   1  -3  -7  207.15    3.97
  -1   3   6   63.50    1.37
   1   4   6   69.20    1.91
  -1  -4  -6   52.24    1.95
  -1  -4  -6   -0.06    0.33
   1  -3  -6   59.66    2.34
  -1   3   5    1.65    0.61
   1   4   5    0.11    0.76
  -1  -4  -5    1.33    0.67
  -1  -4  -5   -0.04    0.15
   1  -3  -5    0.81    0.77
  -1   3   4   16.49    1.24
   1   4   4   18.49    1.51
  -1  -4  -4   -0.08    0.31
   1  -3  -4   20.15    1.61
  -1   3   3    3.84    0.81
   1   4   3    4.35    0.97
  -1  -4  -3    2.23    1.00
   1  -3  -3    4.03    0.88
  -1   3   2   41.34    1.67
   1   4   2   50.57    1.91
  -1  -4  -2   20.74    1.95
  -1   3   1    2.87    0.86
   1   4   1    3.44    0.94
  -1  -4  -1    1.92    0.83
  -1   3   0  219.55    3.27
   1   4   0  223.85    3.32
  -1  -4   0  199.93    3.08
  -1   3  -1    6.19    0.81
   1   4  -1    0.29    0.13
  -1  -4   1   32.51    1.77
  -1   3  -2    0.06    0.26
  -1   3  -2   27.63    1.50
   1   4  -2   27.96    1.81
  -1  -4   2   46.15    1.86
  -1   3  -3  119.22    2.83
  -1   3  -3  103.89    2.47
   1   4  -3   73.04    2.37
   1   4  -3  153.05    2.53
  -1   3  -4  167.77    3.33
  -1   3  -4  162.80    3.12
   1   4  -4   76.54    2.48
   1   4  -4  212.23    3.22
  -1   3  -5  340.80    4.71
  -1   3  -5  350.92    4.71
   1   4  -5  104.99    2.79
   1   4  -5  418.48    4.76
  -1   3  -6  543.17    6.01
  -1   3  -6  509.57    5.94
   1   4  -6  196.50    3.67
   1   4  -6  632.49    6.25
  -1   3  -7   90.26    2.84
  -1   3  -7    0.02    0.39
   1   4  -7   26.87    1.90
   1   4  -7   91.73    2.76
  -1   3  -8   21.27    1.88
  -1   3  -8   16.89    1.84
   1   4  -8    7.05    1.20
   1   4  -8   13.42    1.49
  -1   3  -9   17.71    1.86
  -1   3  -9   15.62    1.85
   1   4  -9    7.22    1.23
   1   4  -9   20.33    2.00
  -1   3 -10   29.10    2.13
  -1   3 -10   28.41    2.29
   1   4 -10   13.19    1.51
   1   4 -10   26.67    2.35
  -1   3 -11   22.40    2.03
  -1   3 -11   22.04    2.25
   1   4 -11   13.46    1.54
   1   4 -11   24.26    2.34
  -1   3 -12   46.42    2.55
  -1   3 -12   38.30    2.76
   1   4 -12   29.14    2.11
   1   4 -12   42.67    2.86
  -1   3 -13    4.06    1.31
  -1   3 -13    4.00    1.43
  -1   3 -13    1.58    0.82
   1   4 -13    3.17    1.14
   1   4 -13    3.14    1.43
  -1   3 -14   19.75    2.27
  -1   3 -14   15.47    2.16
   1   4 -14   14.40    1.71
   1   4 -14   22.32    2.57
  -1   3 -15   24.40    2.46
  -1   3 -15    0.92    0.76
   1   4 -15   17.98    2.14
   1   4 -15   20.40    2.56
  -1   3 -16   11.01    1.83
  -1   3 -16    4.54    1.31
   1   4 -16    9.10    1.64
   1   4 -16    8.47    2.03
  -1   3 -17   24.73    2.65
  -1   3 -17   15.45    2.52
   1   4 -17   21.26    2.89
  -1   3 -18    1.01    1.74
   1   4 -18    0.73    1.75
  -1   3 -19   83.87    4.79
   1   4 -19   89.93    4.94
  -1   3 -20   19.03    2.87
   1   4 -20   19.78    2.98
  -1   3 -21    0.82    1.77
   1   4 -21   -1.08    1.57
  -1   3 -22   71.69    4.84
   1   4 -22   69.73    4.81
  -1   3 -23   32.48    3.86
   1   4 -23   40.19    4.17
  -1   3 -24   15.72    2.99
   1   4 -24   18.95    3.35
  -1   3 -25   10.98    2.74
   1   4 -25    8.91    2.72
  -1   3 -26   10.72    2.99
   1   4 -26    9.14    2.79
  -1   3 -27    8.62    2.77
   1   4 -27   11.33    3.08
  -1   3 -28   11.48    3.11
   1   4 -28   17.11    3.54
  -1   3 -29    1.61    2.46
   1   4 -29   -0.17    2.35
  -3  -5 -29    3.71    2.66
   3  -2 -29    9.13    3.21
  -3  -5 -28    4.96    2.62
   3  -2 -28    6.58    2.92
  -3  -5 -27    3.34    2.36
   3  -2 -27    3.43    2.66
  -3  -5 -26    0.01    2.10
   3  -2 -26    3.37    2.41
  -3  -5 -25    0.89    2.02
   3  -2 -25    1.54    2.18
  -3  -5 -24    0.92    1.88
   3  -2 -24    1.92    2.16
  -3  -5 -23   38.33    3.85
   3  -2 -23   58.25    4.75
  -3  -5 -22    4.28    2.05
  -3  -5 -22    2.65    2.12
   3  -2 -22    3.38    2.25
  -3  -5 -21   26.65    3.32
  -3  -5 -21   13.96    2.82
   3  -2 -21   31.81    3.75
  -3  -5 -20   75.24    4.43
  -3  -5 -20   32.20    3.80
   3  -2 -20  101.86    5.38
  -3  -5 -19   52.17    3.78
  -3  -5 -19   22.97    3.07
   3  -2 -19   65.79    4.56
  -3  -5 -18  120.35    5.06
  -3  -5 -18   50.00    4.10
   3  -2 -18  158.68    6.12
  -3  -5 -17   -0.71    1.54
  -3  -5 -17   -0.85    1.66
   3  -2 -17    0.50    1.81
  -3  -5 -16   20.60    2.54
  -3  -5 -16    6.99    2.03
   3  -2 -16   31.21    3.51
  -3  -5 -15   -0.24    1.32
  -3  -5 -15    0.59    1.57
   3  -2 -15    0.51    1.68
   3   5  14   10.36    1.58
  -3  -5 -14    8.05    1.74
  -3  -5 -14    2.83    1.63
   3  -2 -14    6.72    1.93
   3   5  13    1.44    1.23
  -3  -5 -13    0.80    1.17
  -3  -5 -13   -0.22    1.34
   3  -2 -13    2.44    1.50
   3   5  12   83.98    2.96
  -3  -5 -12   50.48    2.84
  -3  -5 -12   21.57    2.27
   3  -2 -12   68.15    3.58
   3   5  11   62.26    2.65
  -3  -5 -11   36.80    2.37
  -3  -5 -11   15.71    1.95
   3  -2 -11   49.18    3.09
   3   5  10    7.58    1.37
  -3  -5 -10    6.05    1.24
  -3  -5 -10    2.91    1.30
   3  -2 -10    8.09    1.60
   3   5   9  126.89    3.27
  -3  -5  -9   74.19    2.68
  -3  -5  -9   41.01    2.81
   3  -2  -9  100.72    3.63
   3   5   8    8.22    1.34
  -3  -5  -8    3.55    0.93
  -3  -5  -8    3.52    1.21
   3  -2  -8    8.15    0.97
   3  -2  -8    6.73    1.39
   3   5   7  460.17    5.59
  -3  -5  -7  242.93    3.83
  -3  -5  -7  196.31    4.48
   3  -2  -7  459.40    4.29
   3  -2  -7  342.45    5.67
   3   5   6    4.68    1.16
  -3  -5  -6    3.58    0.79
  -3  -5  -6    1.52    1.00
   3  -2  -6    6.05    1.00
   3  -2  -6    4.43    1.11
   3   5   5   38.31    2.19
  -3  -5  -5   17.74    1.22
  -3  -5  -5   -0.17    0.42
   3  -2  -5   39.27    1.94
   3  -2  -5   27.28    2.04
   3   5   4    0.39    1.00
  -3  -5  -4    0.02    0.47
  -3  -5  -4    0.08    0.33
   3  -2  -4   -0.16    0.88
   3  -2  -4   -0.24    0.79
   3   5   3    0.59    0.99
  -3  -5  -3    0.01    0.20
   3  -2  -3    0.58    0.95
   3   5   2   68.49    2.55
   3  -2  -2   71.78    2.55
  -3  -5  -1   41.78    2.42
   3  -2  -1   55.36    2.46
   3   5   0    0.28    0.18
  -3  -5   0  586.91    6.28
   3  -2   0  685.44    6.63
   3   5  -1  174.41    3.62
  -3  -5   1  191.83    3.84
   3  -2   1  217.06    4.13
   3   5  -2  170.86    3.72
   3  -2   2  181.22    3.90
   3   5  -3  109.92    3.15
   3   5  -3  110.78    2.37
   3  -2   3    0.25    0.22
  -3   2  -4  663.26    7.14
  -3   2  -4    0.29    0.29
   3   5  -4  611.26    6.64
   3   5  -4  624.06    5.58
  -3   2  -5  321.01    5.18
  -3   2  -5    0.14    0.29
   3   5  -5  283.86    4.72
   3   5  -5  303.57    4.30
  -3   2  -6  178.97    4.08
  -3   2  -6    0.15    0.32
   3   5  -6  139.51    3.50
   3   5  -6  163.45    3.51
  -3   2  -7    1.78    1.16
  -3   2  -7    0.47    0.41
   3   5  -7    1.58    1.02
   3   5  -7    0.30    0.45
  -3   2  -8    0.35    0.33
   3   5  -8    0.89    1.03
   3   5  -8    1.09    0.98
   3  -2   8    1.84    1.32
  -3   2  -9    0.34    0.30
   3   5  -9   13.08    1.55
   3   5  -9   19.68    2.06
   3  -2   9   24.44    2.53
  -3   2 -10    0.29    0.22
   3   5 -10    0.55    0.98
   3   5 -10    0.69    1.08
   3  -2  10    1.43    1.43
  -3   2 -11    0.27    0.27
  -3   2 -11    4.58    0.82
   3   5 -11    2.94    1.11
   3   5 -11    4.43    1.40
   3  -2  11    7.87    1.74
  -3   2 -12    0.18    0.28
   3   5 -12   21.76    2.07
   3   5 -12   86.04    3.80
   3  -2  12   93.67    3.86
  -3   2 -13    0.62    0.36
   3   5 -13   19.79    2.11
   3   5 -13   61.97    3.51
   3  -2  13   74.66    3.69
  -3   2 -14    0.52    0.37
   3   5 -14   71.88    3.07
   3   5 -14  215.90    5.94
   3  -2  14  246.98    5.87
  -3   2 -15    0.52    0.50
   3   5 -15    2.21    1.27
   3   5 -15    4.75    1.83
   3  -2  15    5.67    2.00
  -3   2 -16    0.31    1.29
   3   5 -16    4.66    1.85
   3  -2  16    1.18    1.89
  -3   2 -17    0.33    1.53
   3   5 -17   -0.75    1.55
   3  -2  17    0.25    1.88
  -3   2 -18    2.70    1.85
   3   5 -18    4.19    2.07
  -3   2 -19    3.83    1.89
   3   5 -19    0.06    1.74
  -3   2 -20   69.72    4.57
   3   5 -20   79.61    4.88
  -3   2 -21    1.86    1.93
   3   5 -21    0.54    1.92
  -3   2 -22   16.69    2.97
   3   5 -22   19.31    3.20
  -3   2 -23   47.57    4.34
   3   5 -23   58.45    4.71
  -3   2 -24   10.40    2.76
   3   5 -24   19.50    3.42
  -3   2 -25   -0.54    1.94
   3   5 -25    2.48    2.29
  -3   2 -26    7.50    2.75
   3   5 -26   11.51    3.02
  -3   2 -27    5.40    2.70
   3   5 -27    3.75    2.57
  -3   2 -28    2.58    2.51
   3   5 -28    8.45    3.09
  -3   2 -29    9.99    3.22
   3   5 -29    9.66    3.28
  -5  -6 -28   14.53    3.22
   5  -1 -28   31.67    4.73
  -5  -6 -27    4.14    2.33
   5  -1 -27    3.36    2.80
  -5  -6 -26    4.70    2.37
   5  -1 -26    6.60    2.88
  -5  -6 -25   23.99    3.69
   5  -1 -25   30.55    4.39
  -5  -6 -24   34.72    3.91
   5  -1 -24   59.82    5.13
  -5  -6 -23   60.44    4.50
   5  -1 -23   99.94    5.96
  -5  -6 -22   50.06    4.15
   5  -1 -22   86.77    5.60
  -5  -6 -21   70.77    4.50
  -5  -6 -21   93.75    5.23
   5  -1 -21  133.08    6.36
  -5  -6 -20   66.74    4.24
  -5  -6 -20   73.00    4.74
   5  -1 -20  118.80    5.91
  -5  -6 -19    9.43    2.17
  -5  -6 -19    6.46    2.25
   5  -1 -19   11.76    2.73
  -5  -6 -18    0.21    1.52
  -5  -6 -18    0.98    1.89
   5  -1 -18    1.94    1.96
  -5  -6 -17   24.91    2.98
  -5  -6 -17   18.61    2.86
   5  -1 -17   32.23    3.83
  -5  -6 -16   -0.81    1.40
  -5  -6 -16   -1.02    1.82
   5  -1 -16    0.30    1.84
   5   6  15   49.39    3.46
  -5  -6 -15   18.94    2.42
  -5  -6 -15   19.42    2.69
   5  -1 -15   36.20    3.73
   5   6  14   33.34    3.22
  -5  -6 -14   16.84    2.29
  -5  -6 -14   18.27    2.58
   5  -1 -14   23.97    2.93
   5   6  13  322.02    6.26
  -5  -6 -13  133.18    4.40
  -5  -6 -13  174.83    5.55
   5  -1 -13    0.06    1.08
   5   6  12  320.55    6.16
  -5  -6 -12  134.65    4.21
  -5  -6 -12  180.79    5.47
   5  -1 -12    1.39    0.92
   5   6  11  136.71    4.43
  -5  -6 -11   52.85    2.83
  -5  -6 -11   74.36    3.90
   5  -1 -11  126.98    3.12
   5  -1 -11   87.08    3.99
   5   6  10    1.25    1.48
  -5  -6 -10   -0.17    0.91
  -5  -6 -10    2.38    1.47
   5  -1 -10    1.49    1.15
   5  -1 -10    1.17    1.36
   5   6   9    1.22    1.43
  -5  -6  -9    0.30    0.85
  -5  -6  -9   -0.30    1.25
   5  -1  -9    0.70    1.12
   5  -1  -9   -0.33    1.16
   5   6   8   98.22    3.67
  -5  -6  -8   29.07    1.92
  -5  -6  -8   64.91    3.39
   5  -1  -8  100.60    3.08
   5  -1  -8   83.33    3.63
   5   6   7    5.95    1.63
  -5  -6  -7    2.08    0.86
  -5  -6  -7    4.01    1.44
   5  -1  -7    6.81    1.42
   5  -1  -7    5.32    1.42
   5   6   6  107.88    3.76
  -5  -6  -6   32.68    1.75
  -5  -6  -6   83.17    3.58
   5  -1  -6  114.05    3.36
   5  -1  -6   76.45    3.30
   5   6   5   11.66    1.81
  -5  -6  -5    8.47    1.59
   5  -1  -5   12.81    1.67
   5  -1  -5    6.00    1.36
   5   6   4    0.59    1.26
  -5  -6  -4    1.05    1.16
   5  -1  -4    1.37    1.22
   5   6   3   -0.96    1.20
  -5  -6  -3   -0.31    1.04
   5  -1  -3    0.11    1.17
   5   6   2    6.97    1.54
  -5  -6  -2    5.31    1.28
   5  -1  -2    8.72    1.59
   5   6   1    1.11    1.04
   5  -1  -1    0.32    1.22
   5   6   0    0.20    0.30
   5  -1   0    0.84    1.30
   5   6  -1    0.55    1.23
   5   6  -1    0.24    0.69
   5  -1   1    0.81    1.28
   5   6  -2    3.53    1.43
   5   6  -2    3.28    0.90
   5  -1   2    4.19    1.50
   5   6  -3   73.31    3.23
   5   6  -3   63.61    2.39
   5  -1   3   67.70    3.09
   5   6  -4    3.44    1.43
   5   6  -4    3.79    1.02
   5  -1   4   -0.37    0.57
   5   6  -5    2.12    1.35
   5   6  -5   -0.11    0.41
   5  -1   5    2.34    1.50
  -5   1  -6   81.30    3.23
   5   6  -6  208.84    4.83
   5   6  -6  181.85    4.10
   5  -1   6  205.22    5.09
  -5   1  -7    7.89    1.49
   5   6  -7   17.04    1.96
   5   6  -7   16.48    1.78
   5  -1   7   17.80    2.29
  -5   1  -8    9.20    1.57
   5   6  -8   18.37    2.05
   5   6  -8   19.38    2.21
   5  -1   8   20.94    2.43
  -5   1  -9   10.70    1.71
   5   6  -9   21.11    2.36
   5   6  -9   22.00    2.41
   5  -1   9   24.17    2.62
  -5   1 -10   43.98    2.99
   5   6 -10   57.34    3.00
   5   6 -10   67.80    3.47
   5  -1  10   75.17    3.87
  -5   1 -11   36.34    2.97
   5   6 -11   46.57    2.81
   5   6 -11   54.32    3.28
   5  -1  11   59.99    3.76
  -5   1 -12   25.09    2.76
   5   6 -12   23.93    2.45
   5   6 -12   32.37    3.08
   5  -1  12   35.36    3.44
  -5   1 -13   15.91    2.44
   5   6 -13   13.17    1.93
   5   6 -13   20.00    2.61
   5  -1  13   23.52    2.91
  -5   1 -14   13.24    2.32
   5   6 -14   13.19    1.93
   5   6 -14   22.94    2.87
   5  -1  14   23.08    2.95
  -5   1 -15    0.94    1.58
   5   6 -15    0.54    1.35
   5   6 -15    0.52    1.63
   5  -1  15   -0.75    2.04
  -5   1 -16   27.28    3.37
   5   6 -16   36.16    3.66
   5  -1  16   41.71    3.97
  -5   1 -17   21.07    3.02
   5   6 -17   31.85    3.59
   5  -1  17   32.99    3.80
  -5   1 -18    0.39    1.62
   5   6 -18    2.07    1.90
   5  -1  18    4.08    2.30
  -5   1 -19   29.19    3.51
   5   6 -19   44.54    4.06
  -5   1 -20   -1.01    1.64
   5   6 -20    0.02    1.85
  -5   1 -21   -0.24    1.77
   5   6 -21    0.45    1.98
  -5   1 -22   76.19    5.12
   5   6 -22   90.53    5.58
  -5   1 -23    4.61    2.32
   5   6 -23    8.17    2.72
  -5   1 -24   17.18    3.22
   5   6 -24   18.74    3.51
  -5   1 -25    9.29    2.92
   5   6 -25   12.52    3.20
  -5   1 -26    1.38    2.32
   5   6 -26    4.38    2.57
  -5   1 -27   -2.08    2.05
   5   6 -27   -1.54    2.32
  -5   1 -28    6.66    3.01
   5   6 -28   13.89    3.61
   7   0 -27    5.06    3.16
   7   0 -26   20.32    4.08
  -7  -7 -25    4.74    2.32
   7   0 -25    7.78    3.16
  -7  -7 -24    3.88    2.17
   7   0 -24    9.81    3.11
  -7  -7 -23    1.12    1.90
   7   0 -23    6.12    2.81
  -7  -7 -22   21.65    3.20
   7   0 -22   49.97    4.75
  -7  -7 -21    2.32    1.86
   7   0 -21    4.64    2.50
  -7  -7 -20    1.99    1.77
   7   0 -20    5.11    2.42
  -7  -7 -19    2.29    1.71
  -7  -7 -19    4.32    2.57
   7   0 -19    3.72    2.29
  -7  -7 -18   26.26    2.99
  -7  -7 -18   55.77    4.40
   7   0 -18   61.12    4.73
  -7  -7 -17    0.09    1.31
  -7  -7 -17   -0.74    2.14
   7   0 -17   -1.97    1.65
  -7  -7 -16    0.18    1.33
  -7  -7 -16   -0.11    1.91
   7   0 -16    0.15    1.79
   7   7  15   22.12    2.99
  -7  -7 -15    8.22    1.94
  -7  -7 -15   14.90    2.77
   7   0 -15   18.83    2.99
   7   7  14    1.74    2.19
  -7  -7 -14    0.40    1.34
  -7  -7 -14    0.61    2.01
   7   0 -14    0.14    1.87
   7   7  13  144.36    5.42
  -7  -7 -13   35.16    2.84
  -7  -7 -13  102.34    5.05
   7   0 -13  115.67    5.35
   7   7  12   38.24    3.74
  -7  -7 -12   10.27    1.82
  -7  -7 -12   30.51    3.63
   7   0 -12   29.73    3.55
   7   7  11   -0.13    1.94
  -7  -7 -11    1.03    1.16
  -7  -7 -11    1.11    1.83
   7   0 -11    0.03    0.83
   7   7  10  196.95    5.90
  -7  -7 -10   62.71    3.06
  -7  -7 -10  163.33    5.59
   7   0 -10  213.86    5.07
   7   0 -10   -0.06    0.60
   7   7   9  333.61    7.21
  -7  -7  -9  103.40    3.57
  -7  -7  -9  273.17    6.73
   7   0  -9  338.48    6.20
   7   0  -9   -0.47    0.47
   7   7   8  417.61    7.87
  -7  -7  -8  351.66    7.38
   7   0  -8  430.90    6.92
   7   0  -8   -0.12    0.55
   7   7   7  259.62    6.39
  -7  -7  -7  218.01    5.99
   7   0  -7  259.36    5.61
   7   0  -7  167.41    5.16
   7   7   6    2.76    1.89
  -7  -7  -6    5.55    1.83
   7   0  -6    6.05    1.82
   7   0  -6    2.93    1.53
   7   7   5    3.02    1.86
  -7  -7  -5    1.14    1.51
   7   0  -5    1.95    1.63
   7   0  -5    2.12    1.46
   7   7   4   57.87    3.58
   7   0  -4   57.90    3.42
   7   7   3   -0.17    1.63
   7   0  -3    0.86    1.59
   7   7   2   -0.59    1.52
   7   0  -2    0.70    1.57
   7   7   1    0.25    0.38
   7   0  -1   16.82    2.35
   7   7   0   97.51    4.07
   7   0   0  101.52    4.15
   7   7  -1  154.92    4.87
   7   7  -1   60.39    2.63
   7   0   1  156.57    5.01
   7   7  -2   15.38    2.26
   7   7  -2   13.00    1.68
   7   0   2   15.02    2.34
   7   7  -3  660.65    9.29
   7   7  -3  596.08    7.39
   7   0   3  655.90    9.42
   7   7  -4  533.29    8.45
   7   7  -4  484.01    6.89
   7   0   4    0.22    0.71
   7   7  -5  151.37    4.90
   7   7  -5  130.62    4.04
   7   0   5  142.47    4.93
   7   7  -6   25.78    2.92
   7   7  -6   27.60    2.67
   7   0   6   24.56    2.87
   7   7  -7   -2.07    1.47
   7   7  -7    0.61    1.30
   7   0   7    0.80    1.86
   7   7  -8   98.78    4.25
   7   7  -8   99.95    4.10
   7   0   8  105.93    4.88
  -7   0  -9   -0.54    1.25
   7   7  -9   -0.85    1.57
   7   7  -9    0.60    1.39
   7   0   9   -0.38    2.03
  -7   0 -10   -0.43    1.28
   7   7 -10    1.09    1.60
   7   7 -10    0.12    1.44
   7   0  10    1.15    2.16
  -7   0 -11    2.67    1.56
   7   7 -11   -0.32    1.53
   7   7 -11    2.00    1.65
   7   0  11    0.09    2.21
  -7   0 -12    3.26    1.75
   7   7 -12    5.50    1.85
   7   7 -12    8.35    2.15
   7   0  12    8.10    2.56
  -7   0 -13   14.61    2.51
   7   7 -13   29.62    3.06
   7   7 -13   30.72    3.50
   7   0  13   31.84    3.92
  -7   0 -14   62.20    4.08
   7   7 -14  101.50    4.27
   7   7 -14  121.60    5.34
   7   0  14  136.16    5.73
  -7   0 -15   20.44    2.96
   7   7 -15   38.49    3.80
   7   0  15   35.77    3.97
  -7   0 -16    5.36    2.10
   7   7 -16   11.79    2.57
   7   0  16   13.10    2.88
  -7   0 -17    8.39    2.33
   7   7 -17   18.16    3.04
   7   0  17   18.82    3.16
  -7   0 -18    1.39    1.83
   7   7 -18   -0.06    1.90
   7   0  18   -2.01    2.14
  -7   0 -19    9.16    2.49
   7   7 -19   18.73    3.25
   7   0  19   18.35    3.29
  -7   0 -20   44.85    4.17
   7   7 -20   78.71    5.23
  -7   0 -21   30.46    3.70
   7   7 -21   43.94    4.49
  -7   0 -22    4.76    2.46
   7   7 -22    7.72    2.81
  -7   0 -23   24.41    3.71
   7   7 -23   47.45    4.79
  -7   0 -24    8.72    2.83
   7   7 -24   12.56    3.19
  -7   0 -25    0.65    2.23
   7   7 -25    0.02    2.43
  -7   0 -26    2.21    2.36
   7   7 -26    3.81    2.82
  -7   0 -27    0.90    2.32
   7   7 -27    1.92    2.75
   9   1 -25    2.06    2.95
   9   1 -24    7.77    3.22
   9   1 -23  149.62    7.70
   9   1 -22   27.87    4.40
   9   1 -21   26.76    4.24
   9   1 -20    9.32    3.11
   9   1 -19    8.70    2.85
   9   1 -18    1.18    2.32
  -9  -8 -17    1.72    2.43
   9   1 -17   -1.29    2.00
   9   8  16   11.04    2.88
  -9  -8 -16    3.30    1.63
  -9  -8 -16    7.27    2.58
   9   1 -16    9.33    2.77
   9   8  15    4.41    2.50
  -9  -8 -15    1.93    1.47
  -9  -8 -15    4.63    2.50
   9   1 -15    4.31    2.38
   9   8  14    4.62    2.45
  -9  -8 -14    1.20    1.37
  -9  -8 -14    6.96    2.49
   9   1 -14    9.14    2.67
   9   8  13   25.13    3.42
  -9  -8 -13    9.27    1.92
  -9  -8 -13   27.03    3.37
   9   1 -13   23.31    3.36
   9   8  12  134.48    5.69
  -9  -8 -12  112.73    5.44
   9   1 -12  110.49    5.56
   9   8  11  260.75    7.47
  -9  -8 -11  214.48    6.92
   9   1 -11  201.36    6.95
   9   8  10   65.19    4.63
  -9  -8 -10   56.74    4.49
   9   1 -10   69.24    4.18
   9   1 -10   61.04    4.52
   9   8   9   29.71    3.65
  -9  -8  -9   27.47    3.37
   9   1  -9   29.58    3.52
   9   1  -9   27.33    3.46
   9   8   8   22.71    3.35
   9   1  -8   23.30    2.99
   9   1  -8   17.66    2.85
   9   8   7  100.40    5.17
   9   1  -7  102.62    4.76
   9   1  -7   85.95    4.83
   9   8   6   55.76    4.32
   9   1  -6   60.59    4.10
   9   1  -6   40.24    3.78
   9   8   5    8.60    2.62
   9   1  -5    8.28    2.42
   9   1  -5    5.63    2.14
   9   8   4   46.60    3.96
   9   1  -4   46.92    3.96
   9   8   3   92.36    4.65
   9   1  -3   96.03    4.79
   9   8   2    0.15    0.64
   9   1  -2   50.08    4.11
   9   8   1    0.44    0.61
   9   1  -1   82.94    4.72
   9   8   0   -1.18    1.08
   9   1   0   23.89    3.19
   9   8  -1    0.85    2.06
   9   8  -1   -0.07    1.37
   9   1   1    1.12    2.22
   9   8  -2   23.80    3.11
   9   8  -2   22.26    2.42
   9   1   2   20.93    3.14
   9   8  -3   -0.19    2.01
   9   8  -3    1.55    1.48
   9   1   3    2.14    2.27
   9   8  -4    5.66    2.34
   9   8  -4    6.86    1.82
   9   1   4   -0.59    1.26
   9   8  -5   21.13    2.97
   9   8  -5   21.78    2.51
   9   1   5    3.03    1.73
   9   8  -6    2.19    2.12
   9   8  -6    2.36    1.70
   9   1   6    1.00    2.30
   9   8  -7   19.63    2.95
   9   8  -7   20.63    2.67
   9   1   7   21.37    3.28
   9   8  -8   12.73    2.66
   9   8  -8   13.21    2.36
   9   1   8   11.43    2.96
   9   8  -9  104.45    4.95
   9   8  -9  107.75    4.87
   9   1   9  112.87    5.68
   9   8 -10   52.98    3.96
   9   8 -10   59.23    4.11
   9   1  10   55.78    4.71
   9   8 -11    7.84    2.24
   9   8 -11    6.87    2.23
   9   1  11    6.04    2.74
   9   8 -12   14.36    2.58
   9   8 -12   11.57    2.48
   9   1  12   12.61    3.06
   9   8 -13    3.39    1.89
   9   8 -13    4.46    2.14
   9   1  13    4.66    2.61
  -9  -1 -14    9.88    2.39
   9   8 -14   24.46    3.31
   9   1  14   22.68    3.52
  -9  -1 -15   10.10    2.41
   9   8 -15   23.61    3.33
   9   1  15   19.24    3.49
  -9  -1 -16   23.58    3.30
   9   8 -16   59.80    4.68
   9   1  16   62.94    4.91
  -9  -1 -17   22.01    3.28
   9   8 -17   46.21    4.42
   9   1  17   55.66    4.82
  -9  -1 -18   11.85    2.67
   9   8 -18   33.80    4.11
   9   1  18   28.39    4.01
  -9  -1 -19    7.00    2.46
   9   8 -19   15.80    3.23
   9   1  19   17.65    3.51
  -9  -1 -20    0.95    1.97
   9   8 -20    3.58    2.48
  -9  -1 -21    2.20    2.09
   9   8 -21    4.17    2.60
  -9  -1 -22   17.60    3.45
   9   8 -22   39.87    4.68
  -9  -1 -23    0.68    2.10
   9   8 -23    3.09    2.76
  -9  -1 -24    0.64    2.11
   9   8 -24    1.97    2.73
  -9  -1 -25    4.77    2.60
   9   8 -25    1.89    2.85
  11   2 -22   17.07    4.05
  11   2 -21    5.05    3.07
  11   2 -20    4.35    2.98
  11   2 -19    0.42    2.57
  11   2 -18    9.99    3.36
  11   2 -17    7.73    2.92
  11   9  16   20.26    3.53
  11   2 -16   24.81    4.03
  11   9  15    2.44    2.63
  11   2 -15    1.37    2.42
  11   9  14    6.28    2.79
  11   2 -14    5.83    2.76
  11   9  13   87.35    5.34
  11   2 -13   72.62    5.29
  11   9  12   28.30    3.84
  11   2 -12   25.58    3.78
  11   9  11    6.51    2.80
  11   2 -11    5.27    2.57
  11   9  10  193.07    7.10
  11   2 -10  167.96    6.88
  11   9   9   98.16    5.48
  11   2  -9   97.79    5.13
  11   2  -9   78.52    5.07
  11   9   8   75.92    5.01
  11   2  -8   75.89    4.67
  11   2  -8   59.03    4.65
  11   9   7   -1.02    2.22
  11   2  -7    1.56    2.28
  11   2  -7    1.21    1.97
  11   9   6   30.87    3.79
  11   2  -6   34.03    3.84
  11   2  -6   22.66    3.26
  11   9   5    8.61    2.76
  11   2  -5    9.78    2.79
  11   2  -5    5.73    2.24
  11   9   4    5.96    2.63
  11   2  -4    2.78    2.51
  11   2  -4    3.95    2.20
  11   9   3    1.72    2.47
  11   2  -3    5.91    2.70
  11   9   2   -0.95    2.18
  11   2  -2    0.38    2.42
  11   9   1    9.14    2.82
  11   2  -1   11.26    2.98
  11   9   0    8.42    2.79
  11   9   0    6.15    2.07
  11   2   0    4.06    2.72
  11   9  -1   37.18    3.99
  11   9  -1   29.76    3.34
  11   2   1   36.15    4.20
  11   9  -2    3.71    2.50
  11   9  -2    2.18    1.76
  11   2   2    5.88    2.79
  11   9  -3  326.53    8.56
  11   9  -3  309.95    7.24
  11   2   3  330.58    8.81
  11   9  -4    4.37    2.45
  11   9  -4    3.31    1.92
  11   2   4    2.93    2.59
  11   9  -5    1.26    2.23
  11   9  -5    0.15    1.70
  11   2   5   -0.90    2.32
  11   9  -6   12.14    2.78
  11   9  -6   11.74    2.42
  11   2   6   12.58    3.04
  11   9  -7   26.23    3.50
  11   9  -7   22.76    3.00
  11   2   7   18.94    3.45
  11   9  -8   10.96    2.78
  11   9  -8   12.48    2.60
  11   2   8   10.65    3.09
  11   9  -9   53.64    4.28
  11   9  -9   46.64    4.05
  11   2   9   52.14    4.76
  11   9 -10    1.64    2.13
  11   9 -10    2.63    2.07
  11   2  10    0.63    2.66
  11   9 -11   57.54    4.37
  11   9 -11   55.96    4.37
  11   2  11   58.92    4.98
  11   9 -12    3.99    2.22
  11   9 -12    2.13    2.04
  11   2  12    1.41    2.74
  11   9 -13   18.74    3.20
  11   2  13   14.73    3.49
  11   9 -14   99.64    5.64
  11   2  14  106.94    6.15
  11   9 -15   23.95    3.60
  11   2  15   17.46    3.70
  11   9 -16  101.43    5.89
  11   2  16  104.31    6.22
  11   9 -17    8.80    2.87
  11   2  17    8.97    3.32
  11   9 -18   10.28    3.11
  11   2  18    6.38    3.26
  11   9 -19   18.24    3.73
  11   2  19   14.29    3.86
  11   9 -20    2.80    2.69
  11   9 -21  102.08    6.62
 -11  -2 -22    2.97    2.33
  11   9 -22   -1.05    2.63
  13   3 -19    3.92    3.22
  13   3 -18    1.85    2.96
  13   3 -17   35.82    5.01
  13  10  16   22.42    4.08
  13   3 -16   17.77    3.79
  13  10  15   26.18    4.21
  13   3 -15   22.02    4.15
  13  10  14    3.89    2.92
  13   3 -14    3.31    2.74
  13  10  13   -0.17    2.60
  13   3 -13   -0.58    2.48
  13  10  12   11.50    3.35
  13   3 -12    8.42    3.01
  13  10  11  161.34    7.29
  13   3 -11  146.06    7.11
  13  10  10  101.15    6.12
  13   3 -10   77.19    5.58
  13  10   9   48.59    4.76
  13   3  -9   40.34    4.54
  13  10   8   79.84    5.56
  13   3  -8   84.41    5.40
  13   3  -8   66.72    5.24
  13  10   7   27.94    4.04
  13   3  -7   32.28    4.14
  13   3  -7   20.20    3.56
  13  10   6    3.75    2.75
  13   3  -6    5.91    2.80
  13   3  -6    1.32    2.24
  13  10   5   93.46    5.81
  13   3  -5   91.48    5.61
  13   3  -5   65.34    5.05
  13  10   4   64.92    5.04
  13   3  -4   66.31    5.06
  13   3  -4   53.26    4.76
  13  10   3  128.36    6.45
  13   3  -3  134.63    6.51
  13   3  -3   82.18    5.48
  13  10   2   10.25    3.14
  13   3  -2   10.47    3.23
  13  10   1   36.21    4.24
  13   3  -1   37.53    4.51
  13  10   0    0.90    2.46
  13   3   0    2.01    2.75
  13  10  -1   11.26    3.12
  13   3   1    7.96    3.18
  13  10  -2   17.42    3.41
  13   3   2   16.14    3.62
  13  10  -3   72.41    5.18
  13   3   3   67.09    5.27
  13  10  -4   34.68    4.20
  13   3   4   26.48    4.10
  13  10  -5   11.01    3.05
  13   3   5   12.89    3.41
  13  10  -6    1.18    2.51
  13   3   6   -0.71    2.69
  13  10  -7    4.06    2.60
  13   3   7    4.10    2.90
  13  10  -8   33.66    4.18
  13   3   8   36.08    4.59
  13  10  -9   37.25    4.28
  13   3   9   31.69    4.49
  13  10 -10    7.11    2.79
  13   3  10    6.35    3.20
  13  10 -11    3.16    2.52
  13   3  11    2.58    3.00
  13   3  12   28.16    4.39
  13   3  13    0.12    2.87
  13   3  14   41.28    5.15
  13  10 -15   47.73    5.02
  13   3  15   36.55    4.96
  13  10 -16    2.88    2.68
  13   3  16   -0.38    3.11
  13  10 -17   63.15    5.63
  13   3  17   51.87    5.66
  13  10 -18    3.86    3.03
  13  10 -19   -1.54    2.55
  15   4 -13   -1.15    2.84
  15   4 -12   40.78    5.24
  15   4 -11   16.23    3.87
  15   4 -10   53.41    5.41
  15  11   9   13.37    3.76
  15   4  -9   10.91    3.41
  15  11   8    5.53    3.29
  15   4  -8    4.01    2.94
  15  11   7   20.56    4.18
  15   4  -7   19.14    3.82
  15   4  -7   16.04    3.69
  15  11   6    9.84    3.44
  15   4  -6    7.87    3.38
  15   4  -6    4.56    2.84
  15  11   5   17.15    3.87
  15   4  -5   17.42    3.84
  15   4  -5   13.72    3.43
  15  11   4   11.42    3.48
  15   4  -4    7.21    3.27
  15   4  -4    7.94    2.98
  15  11   3   36.39    4.76
  15   4  -3   36.27    4.77
  15   4  -3   26.51    4.12
  15  11   2   20.30    3.92
  15   4  -2   14.79    3.76
  15   4  -2   11.05    3.24
  15  11   1   -1.96    2.60
  15   4  -1    1.01    2.91
  15  11   0    2.30    2.91
  15   4   0    3.16    3.04
  15  11  -1    2.19    2.77
  15   4   1   -1.38    2.84
  15  11  -2    9.10    3.30
  15   4   2    3.69    3.16
  15  11  -3   70.52    5.60
  15   4   3   51.29    5.31
  15  11  -4   66.18    5.47
  15   4   4   58.51    5.50
  15  11  -5    3.47    2.92
  15   4   5    1.91    3.05
  15  11  -6   12.85    3.55
  15   4   6   12.03    3.73
  15  11  -7    2.88    2.77
  15   4   7    3.03    3.27
  15  11  -8   39.56    4.93
  15   4   8   37.02    5.12
  15  11  -9   17.91    3.74
  15  11 -10   20.42    3.85
   0  -4 -30   16.24    3.63
   0  -4 -29    2.54    2.45
   0  -4 -28    9.75    2.99
   0  -4 -27    1.06    2.26
   0  -4 -26   13.84    3.13
   0  -4 -25    0.06    2.07
   0  -4 -25   -0.62    2.15
   0  -4 -24   30.13    3.76
   0  -4 -24   14.91    3.10
   0  -4 -23   -0.01    1.89
   0  -4 -23    1.76    2.24
   0  -4 -22    2.90    2.07
   0  -4 -22    2.23    2.17
   0  -4 -21   -0.74    1.66
   0  -4 -21    1.48    1.90
   0  -4 -20    0.77    1.75
   0  -4 -20   -0.11    1.85
   0  -4 -19    0.14    1.72
   0  -4 -19   -0.46    1.87
   0  -4 -18   -0.32    1.66
   0  -4 -18    2.81    1.98
   0  -4 -17   -1.33    1.49
   0  -4 -17    0.56    1.73
   0  -4 -16   34.14    3.15
   0  -4 -16   19.54    2.71
   0  -4 -15    0.94    1.47
   0  -4 -15   -0.51    1.55
   0  -4 -14    9.37    1.90
   0  -4 -14    9.09    1.97
   0  -4 -13   -0.10    1.20
   0  -4 -13    0.13    1.35
   0  -4 -12  358.81    6.41
   0  -4 -11   -0.40    1.01
   0  -4 -10   47.77    2.58
   0  -4  -9    0.34    0.86
   0   4   8   24.54    1.06
   0  -4  -8   73.81    2.64
   0   4   7    0.14    0.56
   0  -4  -7    0.58    0.77
   0  -4  -7    0.50    0.39
   0   4   6   14.90    1.13
   0  -4  -6   46.10    1.98
   0  -4  -6    0.22    0.18
   0   4   5    0.32    0.66
   0  -4  -5    0.29    0.67
   0  -4  -5   -0.06    0.84
   0   4   4   38.23    1.57
   0  -4  -4  117.52    2.40
   0  -4  -4   63.53    2.67
   0   4   3   -0.37    0.76
   0  -4  -3   -0.43    0.89
   0   4   2   89.41    2.29
   0  -4  -2  101.04    2.78
   0   4   1   -0.30    0.83
   0  -4  -1    0.28    0.81
   0   4   0  109.51    2.57
   0  -4   0  133.59    2.59
   0   4  -1    0.10    0.31
   0   4  -2    0.48    0.42
   0   4  -2   54.07    1.66
   0   4  -3   -0.45    0.91
   0   4  -3   -0.01    0.58
   0   4  -4  126.04    2.71
   0   4  -5   -0.15    0.88
   0   4  -5    0.28    0.65
   0   4  -6  242.41    4.20
   0   4  -6  484.28    5.68
   0   4  -7    0.54    0.89
   0   4  -7   -0.01    0.39
   0   4  -8  102.14    3.06
   0   4  -8  158.73    3.84
   0   4  -9    1.04    0.96
   0   4  -9    0.25    0.86
   0   4 -10   47.79    2.46
   0   4 -10   59.55    2.97
   0   4 -11   -0.90    0.87
   0   4 -11    0.08    1.00
   0   4 -12    1.73    1.07
   0   4 -12    5.17    1.45
   0   4 -13    0.10    1.03
   0   4 -13   -0.31    1.11
   0   4 -14  141.38    4.01
   0   4 -14  152.32    5.06
   0   4 -15    0.25    1.23
   0   4 -15    0.73    1.40
   0   4 -16   49.29    2.92
   0   4 -16   48.17    3.63
   0   4 -17   -0.44    1.32
   0   4 -17   -0.34    1.55
   0   4 -18  911.75   13.24
   0   4 -19    1.09    1.74
   0   4 -20  557.00   11.11
   0   4 -21    1.84    1.87
   0   4 -22   47.32    4.31
   0   4 -23   -0.33    1.83
   0   4 -24    4.97    2.42
   0   4 -25    0.12    2.07
   0   4 -26    7.19    2.76
   0   4 -27   -1.29    2.14
   0   4 -28    5.09    2.69
   0   4 -29    0.21    2.42
  -2  -5 -29    1.15    2.37
   2  -3 -29   -0.11    2.51
  -2  -5 -28    1.51    2.33
   2  -3 -28    2.21    2.60
  -2  -5 -27    9.62    2.87
   2  -3 -27   11.55    3.16
   2  -3 -27    7.86    3.04
  -2  -5 -26   22.09    3.50
   2  -3 -26   25.76    3.83
   2  -3 -26   21.24    3.73
  -2  -5 -25    3.06    2.19
   2  -3 -25    1.98    2.21
   2  -3 -25    1.13    2.47
  -2  -5 -24    1.40    1.93
  -2  -5 -24    0.15    2.23
   2  -3 -24    2.22    2.22
  -2  -5 -23   12.01    2.65
  -2  -5 -23    8.31    2.60
   2  -3 -23   10.28    2.78
  -2  -5 -22   33.26    3.55
  -2  -5 -22   20.77    3.13
   2  -3 -22   40.87    4.11
  -2  -5 -21    2.14    1.88
  -2  -5 -21    2.06    2.10
   2  -3 -21    3.87    2.10
  -2  -5 -20   20.16    2.88
  -2  -5 -20    8.96    2.46
   2  -3 -20   23.61    3.32
  -2  -5 -19    1.55    1.73
  -2  -5 -19    0.20    1.94
   2  -3 -19    0.49    1.85
  -2  -5 -18   -0.25    1.64
  -2  -5 -18   -0.14    1.83
   2  -3 -18    0.38    1.85
  -2  -5 -17   -0.90    1.51
  -2  -5 -17   -0.06    1.76
   2  -3 -17   -0.03    1.73
  -2  -5 -16   99.41    4.35
  -2  -5 -16   48.62    3.82
   2  -3 -16  117.17    4.96
  -2  -5 -15   10.93    2.05
  -2  -5 -15    4.54    1.79
   2  -3 -15   11.67    2.29
  -2  -5 -14  113.77    4.19
  -2  -5 -14   47.80    3.52
   2  -3 -14  138.46    4.92
   2   5  13   16.11    1.69
  -2  -5 -13    8.10    1.63
  -2  -5 -13    5.84    1.68
   2  -3 -13   12.15    1.99
   2   5  12    1.72    0.96
  -2  -5 -12    1.40    1.14
  -2  -5 -12    1.74    1.33
   2  -3 -12    1.19    1.24
   2   5  11    7.43    1.15
  -2  -5 -11    5.33    1.29
  -2  -5 -11    1.76    1.26
   2  -3 -11    7.48    1.61
   2   5  10  174.76    3.25
  -2  -5 -10  103.29    3.20
  -2  -5 -10   52.63    3.08
   2  -3 -10  134.43    4.10
   2   5   9    7.09    1.15
  -2  -5  -9    3.64    1.02
  -2  -5  -9    0.87    1.16
   2  -3  -9    6.61    1.41
   2   5   8  296.19    4.08
  -2  -5  -8  175.37    3.47
  -2  -5  -8   85.64    3.35
   2  -3  -8  222.53    4.58
   2   5   7    0.40    0.88
  -2  -5  -7    0.76    0.69
  -2  -5  -7    0.26    0.93
   2  -3  -7   -0.06    0.65
   2  -3  -7    1.29    0.94
   2   5   6 1198.12    7.88
  -2  -5  -6  722.30    5.67
  -2  -5  -6    0.08    0.42
   2  -3  -6 1157.34    6.22
   2  -3  -6  906.28    8.13
  -2   3   5   93.47    2.12
   2   5   5   88.19    2.52
  -2  -5  -5   56.89    1.72
  -2  -5  -5   -0.05    0.27
   2  -3  -5   68.50    2.51
  -2   3   4   12.37    1.33
   2   5   4   14.29    1.60
  -2  -5  -4   -0.18    0.16
   2  -3  -4   10.71    1.27
  -2   3   3   17.86    1.50
   2   5   3   14.13    1.66
  -2  -5  -3    9.15    1.30
  -2   3   2   99.79    2.50
   2   5   2   97.54    2.72
  -2  -5  -2   60.71    2.53
  -2   3   1   13.68    1.55
   2   5   1   12.61    1.38
  -2  -5  -1   10.83    1.32
  -2   3   0  105.62    2.73
  -2  -5   0   87.85    2.76
  -2   3  -1    7.47    1.12
   2   5  -1    0.17    0.16
  -2  -5   1    6.10    1.12
  -2   3  -2   -0.03    0.17
   2   5  -2   28.65    2.00
  -2  -5   2   33.61    2.08
  -2   3  -3    1.15    0.84
  -2   3  -3    1.60    0.75
   2   5  -3    1.98    1.02
   2   5  -3    1.66    0.63
  -2   3  -4    2.76    1.05
  -2   3  -4    2.63    0.78
   2   5  -4    2.48    1.02
   2   5  -4    3.89    0.80
  -2   3  -5   13.47    1.52
  -2   3  -5    0.16    0.37
   2   5  -5    9.83    1.37
   2   5  -5   14.12    1.44
  -2   3  -6  413.76    5.75
   2   5  -6  237.09    4.31
   2   5  -6  435.25    5.31
  -2   3  -7  114.38    3.37
  -2   3  -7   90.42    3.04
   2   5  -7   53.39    2.44
   2   5  -7   68.18    2.42
  -2   3  -8    1.33    1.09
  -2   3  -8   -0.07    0.76
   2   5  -8    0.50    0.92
   2   5  -8    0.47    0.82
  -2   3  -9   53.86    2.70
  -2   3  -9   46.23    2.58
   2   5  -9   16.96    1.86
   2   5  -9   56.65    2.79
  -2   3 -10  283.33    5.32
  -2   3 -10  237.49    5.31
   2   5 -10   98.76    3.21
   2   5 -10  277.56    5.48
  -2   3 -11   15.11    1.85
  -2   3 -11   14.48    1.90
   2   5 -11    7.05    1.36
   2   5 -11   14.50    1.86
  -2   3 -12  393.47    6.47
  -2   3 -12  331.01    6.72
   2   5 -12  137.63    3.76
   2   5 -12  383.90    7.00
  -2   3 -13  102.70    3.79
  -2   3 -13   86.40    3.94
   2   5 -13   39.24    2.53
   2   5 -13   96.73    4.07
  -2   3 -14  127.86    4.22
   2   5 -14   58.19    2.93
   2   5 -14  115.01    4.62
  -2   3 -15   65.46    3.44
  -2   3 -15    1.28    0.69
   2   5 -15   38.60    2.70
   2   5 -15   60.60    3.78
  -2   3 -16   68.89    3.53
  -2   3 -16   49.14    3.40
   2   5 -16   43.52    2.79
   2   5 -16   59.80    3.94
  -2   3 -17    0.22    1.60
   2   5 -17    0.16    1.66
   2  -3  17    2.63    1.93
  -2   3 -18    0.00    1.64
   2   5 -18    1.60    1.87
  -2   3 -19    0.75    1.71
   2   5 -19    0.70    1.75
  -2   3 -20    4.63    2.03
   2   5 -20    6.60    2.24
  -2   3 -21    9.05    2.41
   2   5 -21    7.40    2.38
  -2   3 -22   25.06    3.43
   2   5 -22   25.84    3.51
  -2   3 -23    4.61    2.26
   2   5 -23    5.71    2.34
  -2   3 -24   20.49    3.37
   2   5 -24   18.11    3.23
  -2   3 -25    5.72    2.42
   2   5 -25    7.33    2.61
  -2   3 -26   27.59    3.87
   2   5 -26   40.90    4.50
  -2   3 -27   14.35    3.24
   2   5 -27   17.32    3.58
  -2   3 -28    0.14    2.31
   2   5 -28    2.98    2.55
  -2   3 -29   -3.33    2.15
   2   5 -29   -1.25    2.40
  -4  -6 -29    8.08    3.04
   4  -2 -29   11.69    3.59
  -4  -6 -28    1.08    2.34
   4  -2 -28    3.50    2.94
  -4  -6 -27    6.29    2.53
   4  -2 -27    6.40    2.89
  -4  -6 -26    3.39    2.27
   4  -2 -26   10.94    3.10
  -4  -6 -25    8.33    2.61
   4  -2 -25    7.41    2.86
  -4  -6 -24   14.09    2.92
   4  -2 -24   22.97    3.84
  -4  -6 -23    1.13    1.85
   4  -2 -23    0.12    2.19
  -4  -6 -22    0.93    1.77
  -4  -6 -22   -0.28    2.05
   4  -2 -22    1.99    2.23
  -4  -6 -21    1.49    1.70
  -4  -6 -21    1.38    2.15
   4  -2 -21    1.91    2.11
  -4  -6 -20    0.71    1.52
  -4  -6 -20    0.47    1.97
   4  -2 -20    0.18    1.89
  -4  -6 -19   13.64    2.48
  -4  -6 -19    7.45    2.35
   4  -2 -19   16.37    2.86
  -4  -6 -18    1.04    1.62
  -4  -6 -18    0.44    1.95
   4  -2 -18    1.54    1.94
  -4  -6 -17    1.07    1.60
  -4  -6 -17    0.79    1.93
   4  -2 -17    3.61    2.06
  -4  -6 -16    4.81    1.79
  -4  -6 -16    3.02    1.94
   4  -2 -16    6.63    2.20
  -4  -6 -15   -0.06    1.35
  -4  -6 -15   -0.29    1.64
   4  -2 -15    1.13    1.75
   4   6  14   20.72    2.58
  -4  -6 -14   11.20    1.92
  -4  -6 -14    8.05    2.07
   4  -2 -14   16.64    2.58
   4   6  13    0.27    1.47
  -4  -6 -13    1.43    1.24
  -4  -6 -13    0.75    1.48
   4  -2 -13    0.11    1.55
   4   6  12  251.84    5.04
  -4  -6 -12  124.11    3.98
  -4  -6 -12   97.13    4.25
   4  -2 -12  195.45    5.63
   4   6  11  371.26    5.94
  -4  -6 -11  183.26    4.41
  -4  -6 -11  156.88    4.91
   4  -2 -11  297.89    6.55
   4   6  10   10.64    1.69
  -4  -6 -10    6.32    1.26
  -4  -6 -10    5.58    1.53
   4  -2 -10   10.55    1.20
   4  -2 -10    8.15    1.74
   4   6   9   26.78    2.33
  -4  -6  -9   14.85    1.66
  -4  -6  -9   14.70    1.98
   4  -2  -9   28.94    1.85
   4  -2  -9   24.40    2.55
   4   6   8  147.50    3.88
  -4  -6  -8   62.45    2.35
  -4  -6  -8   81.17    3.56
   4  -2  -8  153.89    3.18
   4  -2  -8  118.04    3.99
   4   6   7   33.23    2.39
  -4  -6  -7   13.99    1.39
  -4  -6  -7   21.20    2.51
   4  -2  -7   38.49    2.15
   4  -2  -7   28.44    2.45
   4   6   6   44.26    2.46
  -4  -6  -6   16.80    1.34
  -4  -6  -6   38.90    2.73
   4  -2  -6   57.30    2.46
   4  -2  -6   38.49    2.61
   4   6   5    4.22    1.26
  -4  -6  -5    1.40    0.62
  -4  -6  -5    3.09    1.22
   4  -2  -5    6.39    1.23
   4  -2  -5    5.11    1.26
   4   6   4   57.88    2.61
  -4  -6  -4   49.14    2.59
   4  -2  -4   76.04    2.83
   4   6   3    6.39    1.37
  -4  -6  -3   -0.30    0.32
   4  -2  -3    8.74    1.42
   4   6   2  110.90    3.35
   4  -2  -2  119.93    3.36
   4   6   1    0.51    0.52
  -4  -6  -1   58.63    2.83
   4  -2  -1   77.29    2.97
   4   6   0    0.05    0.29
  -4  -6   0  428.18    6.12
   4  -2   0  513.90    6.47
   4   6  -1  543.06    6.81
   4   6  -1  486.80    4.25
   4  -2   1  572.96    6.98
   4   6  -2   23.93    2.27
   4   6  -2   19.95    1.50
   4  -2   2   21.13    2.24
   4   6  -3    8.26    1.48
   4   6  -3    7.11    0.99
   4  -2   3    3.31    1.19
   4   6  -4   46.68    2.62
   4   6  -4   48.40    2.05
   4  -2   4    0.23    0.54
   4   6  -5  427.56    6.30
   4   6  -5  408.79    5.20
   4  -2   5  451.16    6.76
  -4   2  -6    0.15    0.31
   4   6  -6   65.30    2.95
   4   6  -6   34.77    1.93
   4  -2   6   72.78    3.41
  -4   2  -7    0.24    0.26
   4   6  -7   15.55    1.84
   4   6  -7   14.61    1.61
   4  -2   7   14.44    2.04
  -4   2  -8    0.29    0.24
   4   6  -8   12.69    1.71
   4   6  -8   13.88    1.71
   4  -2   8   16.22    2.14
  -4   2  -9    0.34    0.24
   4   6  -9   55.39    2.83
   4   6  -9   70.85    3.13
   4  -2   9   81.50    3.71
  -4   2 -10    0.31    0.24
   4   6 -10    9.23    1.59
   4   6 -10   12.67    1.82
   4  -2  10   13.50    2.15
  -4   2 -11    0.46    0.46
   4   6 -11    3.26    1.29
   4   6 -11    4.22    1.47
   4  -2  11    2.06    1.71
  -4   2 -12    0.58    0.37
   4   6 -12    0.00    1.14
   4   6 -12   -1.70    1.16
   4  -2  12   -0.36    1.67
  -4   2 -13    0.49    0.39
   4   6 -13    7.59    1.59
   4   6 -13   21.51    2.59
   4  -2  13   21.44    2.69
  -4   2 -14    1.21    0.63
   4   6 -14    6.37    1.55
   4   6 -14   19.33    2.63
   4  -2  14   18.87    2.65
  -4   2 -15    0.59    1.27
   4   6 -15    1.82    1.36
   4   6 -15    5.38    1.90
   4  -2  15    4.19    2.11
  -4   2 -16    0.90    1.61
   4   6 -16    3.11    1.86
   4  -2  16    5.38    2.24
  -4   2 -17  302.89    8.02
   4   6 -17  396.58    8.86
   4  -2  17  453.64    8.48
  -4   2 -18  322.88    8.46
   4   6 -18  427.35    9.43
   4  -2  18  492.54    8.90
  -4   2 -19    5.53    2.02
   4   6 -19    8.96    2.36
  -4   2 -20  110.91    5.58
   4   6 -20  156.04    6.39
  -4   2 -21  100.08    5.47
   4   6 -21  139.26    6.32
  -4   2 -22   30.51    3.81
   4   6 -22   36.54    4.15
  -4   2 -23    2.73    2.11
   4   6 -23    1.08    2.15
  -4   2 -24    6.34    2.57
   4   6 -24    7.88    2.72
  -4   2 -25    3.12    2.29
   4   6 -25    1.04    2.27
  -4   2 -26   16.22    3.40
   4   6 -26   16.97    3.55
  -4   2 -27    2.42    2.42
   4   6 -27    2.94    2.60
  -4   2 -28   10.37    3.16
   4   6 -28   13.23    3.42
  -4   2 -29    7.00    3.01
   4   6 -29    4.62    2.90
   6  -1 -28   32.05    4.83
  -6  -7 -27    6.88    2.70
   6  -1 -27    8.12    3.25
  -6  -7 -26   15.35    3.09
   6  -1 -26   26.14    4.37
  -6  -7 -25    9.15    2.67
   6  -1 -25   18.03    3.74
  -6  -7 -24    0.17    1.79
   6  -1 -24    0.33    2.27
  -6  -7 -23    7.58    2.36
   6  -1 -23   14.66    3.35
  -6  -7 -22    2.44    1.86
   6  -1 -22    2.51    2.37
  -6  -7 -21   23.15    3.18
  -6  -7 -21   41.19    4.31
   6  -1 -21   47.48    4.56
  -6  -7 -20    1.29    1.65
  -6  -7 -20    2.71    2.27
   6  -1 -20    3.84    2.37
  -6  -7 -19    2.90    1.70
  -6  -7 -19    3.48    2.26
   6  -1 -19    3.89    2.19
  -6  -7 -18   14.07    2.43
  -6  -7 -18   15.28    2.78
   6  -1 -18   21.53    3.29
  -6  -7 -17    0.19    1.43
  -6  -7 -17    3.52    2.12
   6  -1 -17    5.92    2.23
  -6  -7 -16   78.22    4.00
  -6  -7 -16  135.49    5.63
   6  -1 -16  184.93    6.66
   6   7  15    4.81    2.14
  -6  -7 -15    2.07    1.51
  -6  -7 -15    2.35    2.04
   6  -1 -15    4.14    2.11
   6   7  14  152.86    5.14
  -6  -7 -14   48.56    3.17
  -6  -7 -14   92.50    4.85
   6  -1 -14  116.87    5.30
   6   7  13    1.11    1.88
  -6  -7 -13    0.35    1.24
  -6  -7 -13    2.29    1.90
   6  -1 -13    2.73    1.87
   6   7  12    9.67    2.30
  -6  -7 -12    1.96    1.32
  -6  -7 -12    7.52    2.09
   6  -1 -12    0.03    0.95
   6   7  11    6.45    2.03
  -6  -7 -11    2.02    1.22
  -6  -7 -11    3.09    1.83
   6  -1 -11   -0.48    0.57
   6   7  10    1.97    1.77
  -6  -7 -10    0.11    0.95
  -6  -7 -10    1.13    1.67
   6  -1 -10    2.05    1.45
   6  -1 -10   -0.49    0.47
   6   7   9  437.24    7.50
  -6  -7  -9  137.48    3.77
  -6  -7  -9  321.43    6.98
   6  -1  -9  444.31    6.28
   6   7   8  142.69    4.66
  -6  -7  -8   51.02    2.40
  -6  -7  -8  115.45    4.54
   6  -1  -8  147.31    4.04
   6  -1  -8   99.94    4.07
   6   7   7  176.07    5.00
  -6  -7  -7   61.41    2.46
  -6  -7  -7  137.25    4.75
   6  -1  -7  181.97    4.43
   6  -1  -7   89.05    3.82
   6   7   6  146.20    4.62
  -6  -7  -6  108.31    4.27
   6  -1  -6  143.83    4.11
   6   7   5  190.45    5.13
  -6  -7  -5  156.58    4.84
   6  -1  -5  184.26    4.58
   6  -1  -5    0.18    0.52
   6   7   4    5.21    1.72
  -6  -7  -4    3.52    1.48
   6  -1  -4    4.30    1.56
   6   7   3   52.81    3.25
  -6  -7  -3   46.13    3.18
   6  -1  -3   61.10    3.22
   6   7   2   44.18    3.05
   6  -1  -2   42.45    3.01
   6   7   1   53.38    3.09
   6  -1  -1   55.21    3.27
   6   7   0    0.27    0.57
   6  -1   0    3.69    1.64
   6   7  -1    1.93    1.49
   6   7  -1    2.96    0.97
   6  -1   1    2.94    1.65
   6   7  -2   38.96    2.99
   6   7  -2   35.30    2.15
   6  -1   2   42.66    3.10
   6   7  -3   27.46    2.71
   6   7  -3   16.95    1.62
   6  -1   3   22.69    2.69
   6   7  -4    2.05    1.50
   6   7  -4   -0.60    0.50
   6  -1   4   -0.22    0.44
   6   7  -5   52.81    3.23
   6   7  -5   50.23    2.64
   6  -1   5   56.67    3.47
   6   7  -6   25.60    2.71
   6   7  -6   27.81    2.38
   6  -1   6   24.02    2.98
   6   7  -7  347.29    6.63
   6   7  -7  355.66    6.17
   6  -1   7  372.54    7.28
  -6   1  -8    0.39    1.11
   6   7  -8    0.17    1.37
   6   7  -8    1.33    1.20
   6  -1   8    0.74    1.80
  -6   1  -9   28.95    2.65
   6   7  -9   56.74    3.31
   6   7  -9   58.02    3.28
   6  -1   9   68.64    4.06
  -6   1 -10   11.27    2.04
   6   7 -10   17.70    2.27
   6   7 -10   18.68    2.31
   6  -1  10   22.19    2.85
  -6   1 -11   39.55    3.16
   6   7 -11   63.71    3.47
   6   7 -11   73.38    3.89
   6  -1  11   85.40    4.52
  -6   1 -12   25.11    2.89
   6   7 -12   38.95    3.01
   6   7 -12   51.60    3.60
   6  -1  12   55.55    4.12
  -6   1 -13   68.20    4.04
   6   7 -13   87.54    3.93
   6   7 -13  118.07    4.90
   6  -1  13  133.18    5.44
  -6   1 -14   28.88    3.21
   6   7 -14   38.06    3.00
   6   7 -14   54.96    3.88
   6  -1  14   59.19    4.38
  -6   1 -15   68.46    4.28
   6   7 -15   69.89    3.65
   6   7 -15  113.12    5.17
   6  -1  15  124.59    5.42
  -6   1 -16   -0.36    1.56
   6   7 -16    0.24    1.77
   6  -1  16    0.23    2.19
  -6   1 -17    1.63    1.71
   6   7 -17    0.75    1.76
   6  -1  17    2.05    2.35
  -6   1 -18    2.32    1.77
   6   7 -18    3.04    1.97
   6  -1  18    1.96    2.32
  -6   1 -19    6.93    2.30
   6   7 -19    9.28    2.54
   6  -1  19   10.50    2.83
  -6   1 -20    1.26    1.86
   6   7 -20    1.24    2.05
  -6   1 -21   15.68    3.03
   6   7 -21   25.06    3.59
  -6   1 -22    2.49    2.11
   6   7 -22    3.49    2.32
  -6   1 -23   35.98    4.11
   6   7 -23   51.01    4.85
  -6   1 -24    3.97    2.39
   6   7 -24    6.96    2.75
  -6   1 -25   23.89    3.84
   6   7 -25   42.66    4.74
  -6   1 -26   39.85    4.64
   6   7 -26   54.61    5.30
  -6   1 -27   19.27    3.83
   6   7 -27   31.89    4.60
   8   0 -26    0.99    2.88
   8   0 -25   11.77    3.52
   8   0 -24   -1.80    2.37
   8   0 -23   17.51    3.72
   8   0 -22    0.40    2.25
   8   0 -21   31.20    4.30
   8   0 -20    3.69    2.45
  -8  -8 -19    3.43    2.50
   8   0 -19   -0.31    2.14
  -8  -8 -18    3.57    1.74
  -8  -8 -18    5.33    2.58
   8   0 -18    9.61    2.80
  -8  -8 -17    0.48    1.39
  -8  -8 -17    1.01    2.29
   8   0 -17    1.11    2.03
  -8  -8 -16   10.04    2.08
  -8  -8 -16   37.58    4.10
   8   0 -16   37.02    4.03
   8   8  15    3.71    2.32
  -8  -8 -15    1.26    1.35
  -8  -8 -15    4.82    2.43
   8   0 -15    2.81    2.11
   8   8  14   22.23    3.08
  -8  -8 -14    8.03    1.86
  -8  -8 -14   20.30    3.04
   8   0 -14   18.20    3.00
   8   8  13    2.33    2.26
  -8  -8 -13    1.22    1.31
  -8  -8 -13    3.33    2.19
   8   0 -13   -1.09    1.80
   8   8  12    1.16    2.23
  -8  -8 -12   -0.71    1.16
  -8  -8 -12    2.22    2.13
   8   0 -12    0.79    1.86
   8   8  11  209.35    6.46
  -8  -8 -11   67.69    3.38
  -8  -8 -11  164.37    6.11
   8   0 -11  169.60    6.34
   8   8  10   58.01    4.18
  -8  -8 -10   48.40    4.15
   8   0 -10   58.82    3.74
   8   0 -10   46.83    3.99
   8   8   9   -1.22    2.04
  -8  -8  -9    0.20    1.97
   8   0  -9   -0.35    1.83
   8   0  -9   -0.18    1.72
   8   8   8   -0.43    2.08
  -8  -8  -8   -0.29    1.83
   8   0  -8   -0.34    1.81
   8   0  -8    1.12    1.58
   8   8   7   42.12    3.81
  -8  -8  -7   39.65    3.86
   8   0  -7   44.62    3.50
   8   8   6   70.59    4.31
  -8  -8  -6   58.65    4.19
   8   0  -6   67.99    3.90
   8   8   5   14.99    2.63
   8   0  -5   17.82    2.64
   8   0  -5    7.73    1.85
   8   8   4   32.97    3.52
   8   0  -4   33.39    3.49
   8   8   3    3.00    2.02
   8   0  -3    3.30    2.05
   8   8   2    1.65    0.95
   8   0  -2   20.15    2.74
   8   8   1    0.62    0.47
   8   0  -1   27.10    3.38
   8   8   0    1.18    0.67
   8   0   0   76.48    4.33
   8   8  -1  549.22    9.21
   8   8  -1  503.87    7.06
   8   0   1  570.27    9.42
   8   8  -2  412.91    8.15
   8   8  -2  362.19    6.19
   8   0   2  404.15    8.11
   8   8  -3    6.72    2.16
   8   8  -3    4.33    1.51
   8   0   3    4.65    2.06
   8   8  -4  345.09    7.55
   8   8  -4  323.59    6.15
   8   0   4   -0.51    0.64
   8   8  -5  807.95   11.10
   8   8  -5  763.36    9.33
   8   0   5   -0.75    0.57
   8   8  -6    7.02    2.18
   8   8  -6    9.41    1.88
   8   0   6    0.00    0.83
   8   8  -7   12.79    2.50
   8   8  -7   10.76    2.01
   8   0   7   11.86    2.76
   8   8  -8   17.06    2.62
   8   8  -8   17.64    2.42
   8   0   8   17.15    2.95
   8   8  -9  101.42    4.63
   8   8  -9  102.84    4.49
   8   0   9  102.93    5.23
   8   8 -10    6.90    2.10
   8   8 -10    6.64    1.99
   8   0  10    4.37    2.57
   8   8 -11    0.52    1.83
   8   8 -11    1.84    1.79
   8   0  11    0.25    2.40
  -8   0 -12    2.29    1.70
   8   8 -12    6.79    2.10
   8   8 -12    7.40    2.14
   8   0  12    6.52    2.64
  -8   0 -13   10.51    2.33
   8   8 -13   19.77    2.69
   8   8 -13   18.40    2.83
   8   0  13   27.11    3.61
  -8   0 -14    6.53    2.11
   8   8 -14   17.63    2.53
   8   8 -14   23.02    3.11
   8   0  14   20.90    3.34
  -8   0 -15    2.66    1.81
   8   8 -15    4.48    2.15
   8   0  15    5.74    2.66
  -8   0 -16   51.13    4.07
   8   8 -16  101.21    5.31
   8   0  16  110.70    5.65
  -8   0 -17  224.61    7.60
   8   8 -17  445.00   10.11
   8   0  17  476.45   10.30
  -8   0 -18    4.65    2.19
   8   8 -18   14.12    2.97
   8   0  18   12.58    3.14
  -8   0 -19   13.67    2.86
   8   8 -19   33.86    4.09
   8   0  19   34.52    4.13
  -8   0 -20    1.59    1.96
   8   8 -20    3.68    2.42
  -8   0 -21   54.08    4.63
   8   8 -21  112.08    6.22
  -8   0 -22   -0.59    1.91
   8   8 -22   -0.25    2.22
  -8   0 -23    2.17    2.25
   8   8 -23    4.06    2.59
  -8   0 -24   -0.66    2.15
   8   8 -24   -0.65    2.32
  -8   0 -25    2.75    2.44
   8   8 -25    3.32    2.80
  -8   0 -26    4.01    2.62
   8   8 -26    8.65    3.30
  10   1 -24    0.97    2.91
  10   1 -23   52.27    5.54
  10   1 -22    9.77    3.46
  10   1 -21    3.37    2.84
  10   1 -20    0.92    2.50
  10   1 -19   -0.60    2.27
  10   1 -18   17.95    3.50
 -10  -9 -17    5.43    2.67
  10   1 -17    2.56    2.43
  10   9  16  100.27    5.40
 -10  -9 -16   95.04    5.55
  10   1 -16   85.72    5.67
  10   9  15    5.62    2.71
 -10  -9 -15    6.53    2.75
  10   1 -15    4.63    2.57
  10   9  14   83.86    5.03
 -10  -9 -14   72.87    5.08
  10   1 -14   65.99    5.04
  10   9  13   21.68    3.41
 -10  -9 -13   17.72    3.14
  10   1 -13   19.48    3.34
  10   9  12    1.92    2.33
 -10  -9 -12    3.88    2.46
  10   1 -12    2.15    2.18
  10   9  11    7.44    2.67
  10   1 -11    4.71    2.29
  10   9  10   52.91    4.34
  10   1 -10   42.88    4.21
  10   9   9  150.47    6.16
  10   1  -9  162.85    5.73
  10   1  -9  116.64    5.68
  10   9   8   14.77    3.08
  10   1  -8   14.59    2.80
  10   1  -8   12.35    2.72
  10   9   7   35.82    3.99
  10   1  -7   34.51    3.78
  10   1  -7   22.55    3.23
  10   9   6    0.49    2.42
  10   1  -6    2.53    2.38
  10   1  -6    3.38    2.14
  10   9   5   16.02    3.11
  10   1  -5   17.51    3.06
  10   1  -5   12.76    2.74
  10   9   4    8.03    2.78
  10   1  -4    7.32    2.74
  10   9   3   30.40    3.71
  10   1  -3   29.82    3.57
  10   9   2    0.16    2.21
  10   1  -2    0.17    2.35
  10   9   1    5.96    2.55
  10   1  -1    6.02    2.79
  10   9   0   22.40    3.27
  10   9   0   19.11    2.51
  10   1   0   24.40    3.50
  10   9  -1   25.59    3.43
  10   9  -1   22.03    2.59
  10   1   1   24.89    3.52
  10   9  -2   18.34    3.16
  10   9  -2   17.97    2.46
  10   1   2   17.65    3.24
  10   9  -3  109.41    5.41
  10   9  -3  106.83    4.52
  10   1   3  110.27    5.55
  10   9  -4    9.90    2.77
  10   9  -4    7.80    2.09
  10   1   4   10.35    3.03
  10   9  -5   27.57    3.53
  10   9  -5   21.54    2.69
  10   1   5   26.18    3.66
  10   9  -6   53.79    4.31
  10   9  -6   54.87    3.82
  10   1   6   56.28    4.65
  10   9  -7   58.23    4.34
  10   9  -7   55.02    3.90
  10   1   7   52.49    4.62
  10   9  -8   25.07    3.29
  10   9  -8   23.48    2.91
  10   1   8   25.62    3.70
  10   9  -9    1.35    2.00
  10   9  -9    1.67    1.75
  10   1   9    0.85    2.51
  10   9 -10   69.91    4.45
  10   9 -10   67.14    4.36
  10   1  10   63.56    4.88
  10   9 -11   61.82    4.25
  10   9 -11   63.16    4.39
  10   1  11   60.45    4.82
  10   9 -12   12.97    2.59
  10   9 -12   13.66    2.65
  10   1  12   14.72    3.28
  10   9 -13   22.67    3.03
  10   9 -13   22.93    3.32
  10   1  13   20.41    3.61
  10   9 -14    7.31    2.43
  10   1  14   11.52    3.22
  10   9 -15   36.43    4.09
  10   1  15   35.81    4.35
  10   9 -16   63.96    4.88
  10   1  16   60.48    5.12
  10   9 -17    0.25    2.17
  10   1  17    0.12    2.71
 -10  -1 -18   -0.82    1.66
  10   9 -18    0.85    2.18
  10   1  18   -0.34    2.68
 -10  -1 -19    0.79    1.94
  10   9 -19   -2.00    2.03
  10   1  19   -2.25    2.64
 -10  -1 -20    3.38    2.20
  10   9 -20    3.78    2.68
 -10  -1 -21    3.26    2.33
  10   9 -21    6.16    2.90
 -10  -1 -22   29.11    4.19
  10   9 -22   75.59    5.96
 -10  -1 -23    1.68    2.26
  10   9 -23    2.44    2.83
 -10  -1 -24    1.04    2.27
  12   2 -21   39.33    5.39
  12   2 -20   13.78    3.93
  12   2 -19   -1.51    2.63
  12   2 -18    5.76    2.98
  12   2 -17    2.18    2.74
  12  10  16    4.08    2.86
  12   2 -16    3.34    2.79
  12  10  15   -1.61    2.55
  12   2 -15    3.02    2.64
  12  10  14    1.27    2.60
  12   2 -14    1.97    2.63
  12  10  13    5.85    2.79
  12   2 -13   -1.44    2.26
  12  10  12   18.01    3.50
  12   2 -12   13.05    3.22
  12  10  11    1.10    2.59
  12   2 -11    1.95    2.43
  12  10  10   36.32    4.31
  12   2 -10   24.08    3.65
  12  10   9    0.47    2.42
  12   2  -9   -1.75    2.01
  12  10   8   -0.28    2.40
  12   2  -8   -0.21    2.32
  12   2  -8    0.47    2.12
  12  10   7    2.90    2.65
  12   2  -7    2.78    2.48
  12   2  -7    0.49    2.16
  12  10   6   50.47    4.56
  12   2  -6   48.19    4.41
  12   2  -6   34.06    4.10
  12  10   5   18.63    3.45
  12   2  -5   19.48    3.37
  12   2  -5   12.63    2.95
  12  10   4    0.11    2.39
  12   2  -4    1.04    2.45
  12   2  -4   -0.22    2.04
  12  10   3   27.96    3.84
  12   2  -3   33.94    4.19
  12  10   2    1.16    2.36
  12   2  -2    0.04    2.49
  12  10   1    1.07    2.29
  12   2  -1    0.50    2.43
  12  10   0    2.29    2.45
  12   2   0    1.07    2.54
  12  10  -1  126.33    6.07
  12   2   1  122.15    6.11
  12  10  -2  352.58    9.36
  12   2   2  351.52    9.42
  12  10  -3   38.65    4.23
  12   2   3   41.90    4.51
  12  10  -4  377.45    9.61
  12   2   4  367.20    9.77
  12  10  -5   35.12    4.11
  12   2   5   23.75    3.81
  12  10  -6   29.15    3.80
  12   2   6   23.38    3.79
  12  10  -7    0.95    2.31
  12   2   7    0.17    2.66
  12  10  -8   19.86    3.31
  12   2   8   14.91    3.51
  12  10  -9   36.13    4.09
  12   2   9   32.32    4.27
  12  10 -10   11.59    2.94
  12  10 -10   10.95    2.69
  12   2  10    9.00    3.22
  12  10 -11   11.41    2.87
  12  10 -11    8.54    2.64
  12   2  11    7.58    3.22
  12  10 -12    1.43    2.18
  12  10 -12   -0.10    2.08
  12   2  12    0.98    2.84
  12  10 -13   19.60    3.33
  12   2  13   16.61    3.78
  12  10 -14   41.46    4.53
  12   2  14   41.77    4.88
  12  10 -15    6.83    2.77
  12   2  15    5.18    3.25
  12  10 -16  183.90    7.62
  12   2  16  177.96    8.00
  12  10 -17   26.42    4.09
  12   2  17   30.10    4.65
  12  10 -18    5.76    2.98
  12   2  18   -0.20    3.09
  12  10 -19    7.26    3.06
  12   2  19    5.14    3.44
  12  10 -20   39.28    5.02
  14  11  16   -0.31    3.06
  14   3 -16    1.80    3.18
  14  11  15    1.96    3.01
  14   3 -15    0.39    2.97
  14  11  14   13.23    3.78
  14   3 -14   12.24    3.80
  14  11  13   19.65    4.07
  14   3 -13   13.80    3.69
  14  11  12   40.22    4.85
  14   3 -12   29.61    4.50
  14  11  11    1.19    2.78
  14   3 -11    2.23    2.72
  14  11  10  158.16    7.53
  14   3 -10  139.32    7.23
  14  11   9    4.48    3.07
  14   3  -9    5.94    2.87
  14  11   8   -0.92    2.68
  14   3  -8    0.98    2.42
  14  11   7    3.44    2.91
  14   3  -7    1.74    2.73
  14   3  -7    1.37    2.32
  14  11   6   10.03    3.31
  14   3  -6   13.06    3.37
  14   3  -6    9.34    2.96
  14  11   5    8.63    3.18
  14   3  -5    6.21    3.07
  14   3  -5    5.38    2.74
  14  11   4    9.52    3.15
  14   3  -4    8.88    3.25
  14   3  -4    8.43    2.81
  14  11   3   59.79    5.12
  14   3  -3   44.04    4.77
  14   3  -3   36.83    4.46
  14  11   2    8.22    3.05
  14   3  -2    5.90    3.09
  14  11   1   18.56    3.64
  14   3  -1   17.53    3.80
  14  11   0   -1.11    2.53
  14   3   0    1.24    2.91
  14  11  -1   35.02    4.49
  14   3   1   39.00    4.78
  14  11  -2    3.31    2.80
  14   3   2    3.70    3.07
  14  11  -3   26.05    4.08
  14   3   3   20.30    4.02
  14  11  -4    1.50    2.63
  14   3   4    1.96    3.05
  14  11  -5    4.81    2.86
  14   3   5    5.01    3.16
  14  11  -6   68.72    5.30
  14   3   6   63.08    5.46
  14  11  -7   12.16    3.31
  14   3   7   13.69    3.73
  14  11  -8    6.15    2.97
  14   3   8    2.79    3.08
  14  11  -9   86.35    5.76
  14   3   9   86.32    6.24
  14  11 -10   20.46    3.66
  14   3  10   18.11    4.01
  14  11 -11   38.91    4.50
  14   3  11   32.23    4.87
  14   3  12    1.03    3.15
  14   3  13    1.79    3.33
  16   4  -9   -0.31    2.78
  16   4  -8    4.07    3.19
  16   4  -7    0.27    2.75
  16   4  -6   58.31    5.64
  16   4  -6   38.88    5.24
  16   4  -5    1.67    3.21
  16   4  -5    0.56    2.75
  16   4  -4    3.92    3.34
  16   4  -4    1.38    2.71
  16   4  -3    9.33    3.71
  16   4  -3    2.36    2.79
  16   4  -2    1.95    3.28
  16   4  -2   -0.50    2.52
  16   4  -1    2.12    2.77
  -1  -5 -29   22.67    3.86
   1  -4 -29   28.32    4.33
  -1  -5 -28   54.93    4.98
   1  -4 -28   61.37    5.28
  -1  -5 -27   63.31    5.04
   1  -4 -27   70.62    5.50
   1  -4 -27   37.47    4.50
  -1  -5 -26  112.80    6.11
   1  -4 -26  124.04    6.54
   1  -4 -26   76.42    5.65
  -1  -5 -25    5.73    2.45
  -1  -5 -25    4.69    2.65
   1  -4 -25    7.93    2.68
   1  -4 -25    3.03    2.51
  -1  -5 -24    8.94    2.56
  -1  -5 -24    2.00    2.36
   1  -4 -24    8.38    2.70
   1  -4 -24    3.75    2.49
  -1  -5 -23    4.34    2.16
  -1  -5 -23    0.78    2.14
   1  -4 -23    3.53    2.23
   1  -4 -23    2.77    2.36
  -1  -5 -22    2.99    2.01
  -1  -5 -22    2.96    2.17
   1  -4 -22    3.50    2.13
   1  -4 -22    3.12    2.32
  -1  -5 -21    1.79    1.87
  -1  -5 -21    1.43    2.01
   1  -4 -21    2.03    1.91
   1  -4 -21    1.42    2.20
  -1  -5 -20    0.59    1.68
  -1  -5 -20    0.60    2.01
   1  -4 -20    0.96    1.79
   1  -4 -20    1.46    2.19
  -1  -5 -19   54.82    4.00
  -1  -5 -19   21.81    3.02
   1  -4 -19   59.07    4.19
  -1  -5 -18    0.63    1.73
  -1  -5 -18    0.47    1.88
   1  -4 -18   -1.06    1.71
  -1  -5 -17  119.05    4.89
  -1  -5 -17   52.03    4.15
   1  -4 -17  132.85    5.32
  -1  -5 -16    2.55    1.65
  -1  -5 -16    0.39    1.69
   1  -4 -16    4.04    1.86
  -1  -5 -15   74.77    3.83
  -1  -5 -15   35.35    3.55
   1  -4 -15   86.76    4.17
  -1  -5 -14   -1.29    1.25
  -1  -5 -14   -0.36    1.41
   1  -4 -14   -0.34    1.38
  -1  -5 -13   24.94    2.56
  -1  -5 -13    7.74    1.77
   1  -4 -13   27.65    2.75
  -1  -5 -12    4.74    1.35
  -1  -5 -12    2.01    1.34
   1  -4 -12    3.78    1.40
   1   5  11   57.31    1.75
  -1  -5 -11   47.93    2.68
  -1  -5 -11   17.66    2.10
   1  -4 -11   54.78    2.91
   1   5  10    2.91    0.82
  -1  -5 -10    2.55    1.10
  -1  -5 -10    0.20    1.12
   1  -4 -10    1.69    1.08
   1   5   9   12.53    1.33
  -1  -5  -9    9.34    1.35
  -1  -5  -9    3.54    1.25
   1  -4  -9   10.02    1.49
   1   5   8    0.65    0.74
  -1  -5  -8    0.59    0.77
  -1  -5  -8   -0.20    0.94
   1  -4  -8    0.03    0.85
  -1   4   7   52.94    1.52
   1   5   7   62.36    1.97
  -1  -5  -7   50.63    2.08
  -1  -5  -7    2.46    0.76
   1  -4  -7   54.40    2.41
  -1   4   6   31.58    1.40
   1   5   6   38.17    1.73
  -1  -5  -6   35.22    1.74
  -1  -5  -6    0.05    0.23
   1  -4  -6   37.46    2.08
  -1   4   5   41.45    1.60
   1   5   5   53.34    1.95
  -1  -5  -5   45.89    1.67
   1  -4  -5   52.42    2.13
  -1   4   4    9.47    1.03
   1   5   4    9.10    1.14
  -1  -5  -4    4.98    1.15
   1  -4  -4    8.88    1.09
  -1   4   3    4.11    0.92
   1   5   3    5.33    1.03
  -1  -5  -3    2.33    1.03
   1  -4  -3    5.83    0.95
  -1   4   2  151.17    2.91
   1   5   2  193.84    3.41
  -1  -5  -2   87.25    2.85
  -1   4   1   20.12    1.66
   1   5   1   24.83    1.79
  -1  -5  -1   16.19    1.98
  -1   4   0    3.08    0.97
   1   5   0    2.54    1.00
  -1  -5   0    2.21    0.95
  -1   4  -1   51.19    2.06
   1   5  -1    0.26    0.14
  -1  -5   1   65.40    2.28
  -1   4  -2    0.06    0.17
  -1   4  -2   30.69    1.60
   1   5  -2    2.29    0.68
  -1  -5   2   52.49    2.07
  -1   4  -3   24.84    1.76
  -1   4  -3   24.45    1.56
   1   5  -3   12.55    1.43
   1   5  -3   34.53    1.50
  -1  -5   3   35.09    1.78
  -1   4  -4   31.98    2.00
  -1   4  -4   37.00    1.81
   1   5  -4   14.09    1.66
   1   5  -4   46.81    1.84
  -1   4  -5    9.97    1.38
  -1   4  -5   10.76    1.25
   1   5  -5    3.03    1.10
   1   5  -5   11.54    1.41
  -1   4  -6  165.59    3.78
   1   5  -6   81.26    2.83
   1   5  -6  223.33    3.94
  -1   4  -7   28.38    2.07
  -1   4  -7   30.15    2.00
   1   5  -7   13.47    1.54
   1   5  -7    7.34    1.04
  -1   4  -8  127.95    3.55
  -1   4  -8  131.54    3.67
   1   5  -8   59.93    2.60
   1   5  -8  147.14    3.70
  -1   4  -9    8.54    1.46
  -1   4  -9   10.47    1.59
   1   5  -9    3.97    1.22
   1   5  -9   10.32    1.54
  -1   4 -10    5.62    1.34
  -1   4 -10    6.29    1.38
   1   5 -10    3.11    1.18
   1   5 -10    7.44    1.41
  -1   4 -11   22.49    2.17
  -1   4 -11   22.19    2.30
   1   5 -11   10.56    1.54
   1   5 -11   22.14    2.37
  -1   4 -12    3.33    1.29
  -1   4 -12    1.73    1.22
   1   5 -12    0.85    1.07
   1   5 -12    2.70    1.29
  -1   4 -13   59.57    3.00
  -1   4 -13   56.91    3.36
   1   5 -13   37.87    2.54
   1   5 -13   59.90    3.37
  -1   4 -14    4.21    1.49
  -1   4 -14    3.77    1.62
   1   5 -14    2.65    1.28
   1   5 -14    2.91    1.55
  -1   4 -15    0.47    1.36
  -1   4 -15   -0.75    1.43
   1   5 -15    0.83    1.24
   1   5 -15    0.72    1.42
  -1   4 -16    2.19    1.53
  -1   4 -16    0.49    1.53
   1   5 -16    0.14    1.27
   1   5 -16    1.27    1.59
  -1   4 -17   31.51    2.93
  -1   4 -17   24.91    3.08
   1   5 -17   29.46    2.66
   1   5 -17   35.12    3.52
  -1   4 -18    6.84    2.20
   1   5 -18    3.32    1.94
  -1   4 -19   89.13    4.96
   1   5 -19   97.87    5.10
  -1   4 -20    0.01    1.69
   1   5 -20    0.16    1.68
  -1   4 -21    9.73    2.42
   1   5 -21   10.07    2.48
  -1   4 -22   10.98    2.69
   1   5 -22   12.06    2.79
  -1   4 -23   54.10    4.50
   1   5 -23   58.41    4.71
  -1   4 -24   44.22    4.32
   1   5 -24   40.35    4.32
  -1   4 -25   48.27    4.59
   1   5 -25   53.01    4.83
  -1   4 -26   34.11    4.26
   1   5 -26   47.54    4.75
  -1   4 -27   17.69    3.55
   1   5 -27   18.89    3.67
  -1   4 -28   17.27    3.65
   1   5 -28   15.90    3.57
  -1   4 -29    2.45    2.63
   1   5 -29    5.65    2.92
  -3  -6 -29    2.09    2.49
   3  -3 -29    3.08    2.83
  -3  -6 -28  115.09    6.47
   3  -3 -28  148.56    7.63
   3  -3 -28  104.82    6.71
  -3  -6 -27   33.30    4.09
   3  -3 -27   43.04    4.83
   3  -3 -27   36.68    4.74
  -3  -6 -26   10.66    2.79
   3  -3 -26   18.81    3.53
  -3  -6 -25    0.41    1.88
   3  -3 -25    0.32    2.14
  -3  -6 -24    2.10    1.97
  -3  -6 -24   -1.74    2.10
   3  -3 -24    0.68    2.16
  -3  -6 -23    5.90    2.19
  -3  -6 -23    3.49    2.43
   3  -3 -23    8.82    2.73
  -3  -6 -22    0.56    1.77
  -3  -6 -22   -0.12    2.11
   3  -3 -22   -0.39    1.97
  -3  -6 -21    7.93    2.26
  -3  -6 -21    2.66    2.26
   3  -3 -21   10.92    2.68
  -3  -6 -20   28.51    3.24
  -3  -6 -20   12.49    2.66
   3  -3 -20   33.89    3.80
  -3  -6 -19    1.36    1.67
  -3  -6 -19   -3.18    1.70
   3  -3 -19   -0.30    1.78
  -3  -6 -18   11.97    2.39
  -3  -6 -18    5.77    2.30
   3  -3 -18   18.88    3.06
  -3  -6 -17   69.25    3.98
  -3  -6 -17   32.32    3.83
   3  -3 -17   89.15    4.83
  -3  -6 -16   27.80    2.97
  -3  -6 -16   15.08    2.61
   3  -3 -16   35.07    3.59
  -3  -6 -15    0.06    1.29
  -3  -6 -15   -1.71    1.55
   3  -3 -15   -1.05    1.56
  -3  -6 -14   14.23    2.08
  -3  -6 -14    6.28    1.94
   3  -3 -14   18.35    2.55
   3   6  13   -0.58    1.12
  -3  -6 -13    0.99    1.15
  -3  -6 -13   -0.59    1.38
   3  -3 -13    0.02    1.41
   3   6  12  108.05    3.21
  -3  -6 -12   56.98    2.90
  -3  -6 -12   28.22    3.06
   3  -3 -12   83.62    3.90
   3   6  11    1.43    1.13
  -3  -6 -11    1.94    1.03
  -3  -6 -11    0.67    1.30
   3  -3 -11    3.17    1.45
   3   6  10   42.55    2.38
  -3  -6 -10   24.72    2.02
  -3  -6 -10   12.49    1.88
   3  -3 -10   34.54    2.80
   3   6   9   18.46    1.95
  -3  -6  -9    9.47    1.28
  -3  -6  -9    6.01    1.49
   3  -3  -9   17.31    1.45
   3  -3  -9   17.38    2.04
   3   6   8   39.31    2.29
  -3  -6  -8   19.29    1.60
  -3  -6  -8   14.48    1.89
   3  -3  -8   37.15    1.84
   3  -3  -8   25.98    2.45
   3   6   7    8.77    1.39
  -3  -6  -7    3.90    0.83
  -3  -6  -7    3.24    1.27
   3  -3  -7    8.78    1.15
   3  -3  -7    6.39    1.34
   3   6   6   -0.73    0.97
  -3  -6  -6    0.03    0.53
  -3  -6  -6   -0.09    0.96
   3  -3  -6    1.01    0.89
   3  -3  -6    1.45    0.97
   3   6   5   42.32    2.24
  -3  -6  -5   17.77    1.13
  -3  -6  -5   -0.03    0.45
   3  -3  -5   41.68    2.05
   3  -3  -5   25.59    2.10
   3   6   4   34.32    2.17
  -3  -6  -4   -0.16    0.22
   3  -3  -4   34.92    2.12
   3  -3  -4   19.99    1.94
   3   6   3   29.49    2.04
  -3  -6  -3   19.06    2.09
   3  -3  -3   30.42    2.08
  -3   3   2   78.62    2.56
  -3  -6  -2   58.19    2.75
  -3   3   1    0.66    0.88
   3   6   1    0.59    0.54
  -3  -6  -1   -0.31    0.94
  -3   3   0   44.15    2.21
   3   6   0    0.47    0.39
  -3  -6   0   33.85    2.35
  -3   3  -1   -0.72    0.50
   3   6  -1    0.37    0.21
  -3  -6   1   91.26    3.02
  -3   3  -2   -0.22    0.36
   3   6  -2  107.60    3.22
  -3   3  -3   -0.03    0.23
   3   6  -3    6.34    1.36
   3   6  -3    6.81    0.87
  -3   3  -4    4.53    1.22
  -3   3  -4    2.37    0.78
   3   6  -4    3.00    1.16
   3   6  -4    3.11    0.80
  -3   3  -5    1.00    1.08
  -3   3  -5    0.70    0.74
   3   6  -5    0.41    1.02
   3   6  -5    0.51    0.70
  -3   3  -6  226.53    4.80
  -3   3  -6  131.94    3.68
   3   6  -6  181.53    4.18
   3   6  -6  223.81    4.02
  -3   3  -7   71.31    3.11
  -3   3  -7   37.67    2.32
   3   6  -7   49.07    2.60
   3   6  -7   -0.19    0.40
  -3   3  -8   52.46    2.87
  -3   3  -8   36.95    2.42
   3   6  -8   33.89    2.35
   3   6  -8   52.50    2.62
  -3   3  -9  114.27    3.83
  -3   3  -9   79.14    3.33
   3   6  -9   57.98    2.76
   3   6  -9  106.07    3.55
  -3   3 -10    1.16    1.26
  -3   3 -10    1.08    1.03
   3   6 -10    0.35    1.04
   3   6 -10    0.55    1.03
  -3   3 -11   51.84    3.05
  -3   3 -11   41.79    2.93
   3   6 -11   15.34    1.82
   3   6 -11   48.44    2.99
  -3   3 -12    7.03    1.77
  -3   3 -12    6.05    1.60
   3   6 -12    2.71    1.27
   3   6 -12    7.55    1.72
  -3   3 -13    0.30    0.50
   3   6 -13   47.19    2.85
   3   6 -13  135.13    4.80
  -3   3 -14    0.73    0.57
   3   6 -14   70.99    3.29
   3   6 -14  180.55    5.56
   3  -3  14  203.94    5.64
   3   6 -15   18.11    2.12
   3   6 -15   50.58    3.66
   3  -3  15   52.61    3.83
  -3   3 -16    5.19    1.91
   3   6 -16    2.92    1.49
   3   6 -16    8.85    2.26
   3  -3  16    9.24    2.39
  -3   3 -17   27.84    3.25
   3   6 -17   30.22    3.45
   3  -3  17   40.77    3.85
  -3   3 -18  107.44    5.14
   3   6 -18  130.74    5.63
   3  -3  18  154.09    5.48
  -3   3 -19    2.05    1.81
   3   6 -19    5.17    2.14
  -3   3 -20    2.48    1.83
   3   6 -20    1.84    1.91
  -3   3 -21    9.36    2.50
   3   6 -21   12.65    2.76
  -3   3 -22   42.73    4.12
   3   6 -22   49.64    4.42
  -3   3 -23    9.15    2.62
   3   6 -23   16.18    3.08
  -3   3 -24    5.18    2.39
   3   6 -24    6.06    2.51
  -3   3 -25    1.97    2.15
   3   6 -25    2.22    2.34
  -3   3 -26    3.29    2.36
   3   6 -26    2.05    2.33
  -3   3 -27    3.45    2.57
   3   6 -27    3.08    2.54
  -3   3 -28    0.49    2.40
   3   6 -28    0.79    2.41
  -3   3 -29   32.68    4.63
   3   6 -29   36.77    4.82
  -5  -7 -28    0.64    2.24
   5  -2 -28    2.47    2.85
  -5  -7 -27    9.10    2.82
   5  -2 -27   21.25    4.05
  -5  -7 -26   58.01    4.75
   5  -2 -26  105.04    6.61
  -5  -7 -25    6.08    2.41
   5  -2 -25   11.44    3.22
  -5  -7 -24   10.18    2.58
   5  -2 -24   19.13    3.60
  -5  -7 -23    2.36    1.98
   5  -2 -23    0.02    2.24
  -5  -7 -22    0.03    1.76
  -5  -7 -22    0.43    2.13
   5  -2 -22    1.96    2.33
  -5  -7 -21    4.08    1.94
  -5  -7 -21    2.29    2.29
   5  -2 -21    9.81    2.77
  -5  -7 -20    3.17    1.84
  -5  -7 -20    2.82    2.22
   5  -2 -20    4.87    2.42
  -5  -7 -19   54.82    3.78
  -5  -7 -19   60.61    4.44
   5  -2 -19  106.87    5.55
  -5  -7 -18   -1.30    1.29
  -5  -7 -18   -0.67    1.93
   5  -2 -18   -0.48    1.80
  -5  -7 -17   56.67    3.68
  -5  -7 -17   63.96    4.40
   5  -2 -17  108.53    5.48
  -5  -7 -16   73.34    3.91
  -5  -7 -16   75.93    4.62
   5  -2 -16  136.62    5.82
  -5  -7 -15    5.89    1.78
  -5  -7 -15    7.70    2.28
   5  -2 -15   12.77    2.63
   5   7  14    7.34    1.94
  -5  -7 -14    3.51    1.50
  -5  -7 -14    3.16    1.96
   5  -2 -14    3.47    1.94
   5   7  13    2.17    1.77
  -5  -7 -13   -0.06    1.24
  -5  -7 -13    0.40    1.73
   5  -2 -13    1.29    1.74
   5   7  12   23.59    2.91
  -5  -7 -12    9.35    1.68
  -5  -7 -12   14.39    2.40
   5  -2 -12   19.14    2.65
   5   7  11   67.42    3.59
  -5  -7 -11   21.41    2.15
  -5  -7 -11   37.08    3.40
   5  -2 -11   54.60    3.70
   5   7  10    0.72    1.49
  -5  -7 -10   -0.69    0.87
  -5  -7 -10   -0.51    1.44
   5  -2 -10    0.13    1.15
   5  -2 -10    0.67    1.40
   5   7   9    0.86    1.43
  -5  -7  -9   -0.14    0.80
  -5  -7  -9    0.55    1.43
   5  -2  -9    0.70    1.17
   5  -2  -9    1.44    1.32
   5   7   8    5.34    1.63
  -5  -7  -8    3.29    0.96
  -5  -7  -8    5.75    1.65
   5  -2  -8    7.84    1.47
   5  -2  -8    6.06    1.64
   5   7   7   81.72    3.47
  -5  -7  -7   27.71    1.70
  -5  -7  -7   53.78    3.29
   5  -2  -7   87.15    3.11
   5  -2  -7   59.49    3.26
   5   7   6    0.98    1.36
  -5  -7  -6    0.81    0.65
  -5  -7  -6    0.27    1.28
   5  -2  -6    1.25    1.23
   5  -2  -6    1.33    1.18
   5   7   5   78.50    3.39
  -5  -7  -5   62.80    3.39
   5  -2  -5   86.04    3.27
   5  -2  -5   57.73    3.27
   5   7   4   95.03    3.62
  -5  -7  -4   74.35    3.52
   5  -2  -4  100.27    3.50
   5   7   3   13.60    1.91
  -5  -7  -3    7.71    1.44
   5  -2  -3   15.30    1.92
   5   7   2  118.29    3.91
  -5  -7  -2   -0.04    0.32
   5  -2  -2  127.04    3.89
   5   7   1    0.18    1.23
  -5  -7  -1    1.20    1.19
   5  -2  -1    0.45    1.35
   5   7   0    0.37    0.40
   5   7   0   42.02    1.76
   5  -2   0   50.58    3.02
   5   7  -1   56.91    2.97
   5   7  -1   50.14    1.95
   5  -2   1   58.79    3.11
   5   7  -2    0.29    1.29
   5   7  -2    2.43    0.84
   5  -2   2    2.16    1.45
   5   7  -3   34.83    2.75
   5   7  -3   35.77    1.95
   5  -2   3   41.82    2.87
   5   7  -4    9.13    1.78
   5   7  -4    9.39    1.22
   5  -2   4   -0.26    0.29
   5   7  -5  132.85    4.17
   5   7  -5   91.46    2.78
   5  -2   5  133.80    4.34
  -5   2  -6    0.24    0.20
   5   7  -6   61.65    3.14
   5   7  -6   22.41    1.84
   5  -2   6   71.34    3.62
  -5   2  -7    0.22    0.24
   5   7  -7    8.13    1.69
   5   7  -7    8.95    1.46
   5  -2   7   10.80    2.07
  -5   2  -8    0.20    0.26
   5   7  -8  156.12    4.53
   5   7  -8  176.71    4.46
   5  -2   8  188.43    5.35
  -5   2  -9   -0.13    0.40
   5   7  -9   -0.63    1.22
   5   7  -9    0.58    1.14
   5  -2   9    0.34    1.64
  -5   2 -10    0.30    0.49
   5   7 -10    2.68    1.41
   5   7 -10    2.14    1.34
   5  -2  10    1.89    1.85
  -5   2 -11    1.03    0.52
   5   7 -11   -0.31    1.27
   5   7 -11    0.37    1.35
   5  -2  11    1.59    1.85
  -5   2 -12    0.18    0.44
   5   7 -12   20.98    2.50
   5   7 -12   31.11    3.09
   5  -2  12   34.87    3.50
  -5   2 -13    0.49    0.60
   5   7 -13   -0.14    1.36
   5   7 -13    0.16    1.48
   5  -2  13    0.78    2.02
  -5   2 -14    4.08    1.73
   5   7 -14    2.67    1.56
   5   7 -14    8.49    2.13
   5  -2  14    8.82    2.40
  -5   2 -15    1.81    1.69
   5   7 -15    0.07    1.37
   5   7 -15    0.58    1.72
   5  -2  15    0.97    2.13
  -5   2 -16    4.68    2.00
   5   7 -16    5.94    2.17
   5  -2  16    6.81    2.57
  -5   2 -17   -0.76    1.57
   5   7 -17    1.60    1.82
   5  -2  17   -0.90    2.22
  -5   2 -18   37.37    3.66
   5   7 -18   55.60    4.22
   5  -2  18   66.74    4.42
  -5   2 -19   52.79    4.18
   5   7 -19   73.43    4.77
   5  -2  19   83.03    4.78
  -5   2 -20    8.26    2.41
   5   7 -20   16.21    3.06
  -5   2 -21    2.76    2.04
   5   7 -21    5.17    2.27
  -5   2 -22    6.75    2.45
   5   7 -22   14.60    3.05
  -5   2 -23   32.32    3.95
   5   7 -23   47.74    4.63
  -5   2 -24   12.06    3.02
   5   7 -24   17.76    3.44
  -5   2 -25   24.12    3.83
   5   7 -25   46.25    4.77
  -5   2 -26   12.81    3.20
   5   7 -26   28.13    4.25
  -5   2 -27   19.02    3.77
   5   7 -27   29.06    4.27
  -5   2 -28    9.26    3.12
   5   7 -28   18.92    3.93
   7  -1 -27    6.47    3.25
   7  -1 -26   -0.07    2.67
   7  -1 -25   10.31    3.40
   7  -1 -24   19.59    3.74
   7  -1 -23    0.52    2.34
   7  -1 -22    3.64    2.53
   7  -1 -21    0.52    2.17
  -7  -8 -20    8.67    2.23
  -7  -8 -20   22.29    3.46
   7  -1 -20   25.17    3.77
  -7  -8 -19    2.77    1.68
  -7  -8 -19    4.43    2.37
   7  -1 -19    4.72    2.47
  -7  -8 -18   20.72    2.81
  -7  -8 -18   46.76    4.37
   7  -1 -18   57.79    4.69
  -7  -8 -17    1.28    1.44
  -7  -8 -17    4.70    2.37
   7  -1 -17    1.38    2.04
  -7  -8 -16   10.54    2.09
  -7  -8 -16   16.85    2.91
   7  -1 -16   25.69    3.40
   7   8  15  100.63    4.69
  -7  -8 -15   28.67    2.73
  -7  -8 -15   66.64    4.59
   7  -1 -15   70.15    4.64
   7   8  14   43.98    3.81
  -7  -8 -14   13.24    2.12
  -7  -8 -14   31.73    3.93
   7  -1 -14   37.52    3.99
   7   8  13   11.96    2.62
  -7  -8 -13    2.78    1.45
  -7  -8 -13    5.48    2.35
   7  -1 -13    8.66    2.45
   7   8  12   71.03    4.23
  -7  -8 -12   20.66    2.36
  -7  -8 -12   49.72    4.15
   7  -1 -12   59.22    4.32
   7   8  11  105.04    4.74
  -7  -8 -11   34.36    2.54
  -7  -8 -11   76.54    4.64
   7  -1 -11   60.38    4.06
   7   8  10   22.75    2.93
  -7  -8 -10    7.51    1.49
  -7  -8 -10   17.67    2.77
   7  -1 -10   25.31    2.89
   7  -1 -10   -0.06    0.59
   7   8   9   29.67    3.37
  -7  -8  -9    8.11    1.46
  -7  -8  -9   22.72    2.84
   7  -1  -9   29.13    2.99
   7  -1  -9   -0.52    0.48
   7   8   8    6.59    2.22
  -7  -8  -8    6.00    2.11
   7  -1  -8    9.55    2.02
   7  -1  -8   -0.15    0.49
   7   8   7   -1.45    1.81
  -7  -8  -7    3.09    1.84
   7  -1  -7    2.22    1.73
   7  -1  -7    0.24    0.45
   7   8   6   28.29    3.24
  -7  -8  -6   19.59    2.57
   7  -1  -6   28.19    3.01
   7  -1  -6   -0.06    0.40
   7   8   5   69.09    3.86
  -7  -8  -5   64.61    4.00
   7  -1  -5   78.55    3.78
   7  -1  -5   -0.26    0.32
   7   8   4   54.27    3.65
  -7  -8  -4   46.56    3.60
   7  -1  -4   58.02    3.45
   7   8   3   95.15    4.25
   7  -1  -3   94.47    4.07
   7   8   2   96.03    4.24
   7  -1  -2   92.16    4.09
   7   8   1    5.23    1.77
   7  -1  -1    5.76    1.94
   7   8   0    1.73    0.99
   7   8   0  141.24    3.41
   7  -1   0  172.12    5.25
   7   8  -1    1.54    1.66
   7   8  -1    0.12    0.49
   7  -1   1    0.65    1.67
   7   8  -2   69.70    3.87
   7   8  -2   -0.27    0.50
   7  -1   2   67.66    3.86
   7   8  -3   70.45    3.78
   7   8  -3   62.19    2.84
   7  -1   3   65.27    3.84
   7   8  -4    9.29    2.08
   7   8  -4    9.86    1.61
   7  -1   4    9.47    2.00
   7   8  -5   66.81    3.87
   7   8  -5   66.82    3.22
   7  -1   5    0.14    0.63
   7   8  -6  226.60    5.98
   7   8  -6  217.66    5.04
   7  -1   6  226.70    6.10
   7   8  -7   24.41    3.02
   7   8  -7   24.82    2.71
   7  -1   7   29.63    3.51
   7   8  -8   20.23    2.61
   7   8  -8   20.43    2.31
   7  -1   8   19.87    2.95
   7   8  -9   61.62    3.73
   7   8  -9   64.92    3.62
   7  -1   9   67.15    4.47
  -7   1 -10    1.84    1.52
   7   8 -10    0.85    1.64
   7   8 -10    1.58    1.59
   7  -1  10    2.90    2.35
  -7   1 -11    9.31    2.16
   7   8 -11   18.76    2.55
   7   8 -11   20.64    2.65
   7  -1  11   22.47    3.19
  -7   1 -12   -0.44    1.46
   7   8 -12   -0.64    1.56
   7   8 -12   -1.39    1.58
   7  -1  12   -0.96    2.29
  -7   1 -13   38.73    3.55
   7   8 -13   67.64    3.87
   7   8 -13   85.19    4.53
   7  -1  13   88.52    5.07
  -7   1 -14   48.93    3.84
   7   8 -14   68.33    3.86
   7   8 -14   85.61    4.63
   7  -1  14   91.86    5.17
  -7   1 -15   95.21    4.95
   7   8 -15  122.17    4.73
   7   8 -15  169.16    6.10
   7  -1  15  181.68    6.53
  -7   1 -16   33.58    3.53
   7   8 -16   66.23    4.46
   7  -1  16   71.42    4.75
  -7   1 -17    1.43    1.78
   7   8 -17    0.68    1.91
   7  -1  17    3.52    2.51
  -7   1 -18   36.10    3.72
   7   8 -18   63.69    4.60
   7  -1  18   65.85    4.84
  -7   1 -19   67.60    4.77
   7   8 -19  126.18    6.08
   7  -1  19  132.46    6.06
  -7   1 -20    0.14    1.81
   7   8 -20   -0.02    1.95
  -7   1 -21   16.09    3.13
   7   8 -21   29.80    3.93
  -7   1 -22   10.92    2.80
   7   8 -22   18.94    3.53
  -7   1 -23    3.01    2.25
   7   8 -23    8.96    2.88
  -7   1 -24    2.23    2.31
   7   8 -24    7.89    2.81
  -7   1 -25    0.85    2.21
   7   8 -25    0.54    2.48
  -7   1 -26   -0.06    2.29
   7   8 -26    1.97    2.70
  -7   1 -27    7.61    3.05
   9   0 -25   19.22    4.09
   9   0 -24    0.32    2.78
   9   0 -23   16.91    3.89
   9   0 -22    0.41    2.64
   9   0 -21   23.99    3.99
   9   0 -20    6.17    2.76
  -9  -9 -19   32.74    3.99
   9   0 -19   43.75    4.59
  -9  -9 -18   10.94    2.91
   9   0 -18   16.52    3.29
  -9  -9 -17    1.17    2.42
   9   0 -17    2.03    2.19
  -9  -9 -16  170.08    6.80
   9   0 -16  167.89    7.05
   9   9  15    8.72    2.63
  -9  -9 -15    4.26    2.51
   9   0 -15    8.43    2.64
   9   9  14    0.45    2.23
  -9  -9 -14    0.66    2.27
   9   0 -14   -0.20    1.95
   9   9  13    0.22    2.17
  -9  -9 -13    1.21    2.24
   9   0 -13   -0.97    1.91
   9   9  12   61.47    4.47
  -9  -9 -12   45.13    4.23
   9   0 -12   40.78    4.02
   9   9  11   27.73    3.52
  -9  -9 -11   23.43    3.26
   9   0 -11   21.90    3.27
   9   9  10    1.19    2.37
  -9  -9 -10    3.64    2.34
   9   0 -10    1.74    2.01
   9   9   9   47.02    4.17
  -9  -9  -9   47.31    4.44
   9   0  -9   52.50    3.93
   9   0  -9   45.32    4.24
   9   9   8    0.46    2.30
  -9  -9  -8   -1.42    1.97
   9   0  -8    0.78    2.08
   9   0  -8    0.35    1.86
   9   9   7   38.41    4.04
   9   0  -7   28.97    3.24
   9   0  -7   27.78    3.40
   9   9   6    0.37    2.24
   9   0  -6    2.18    2.14
   9   0  -6    0.21    1.78
   9   9   5   19.67    3.12
   9   0  -5   25.48    3.18
   9   0  -5   14.49    2.70
   9   9   4  167.74    6.12
   9   0  -4  163.63    5.75
   9   9   3    0.30    2.18
   9   0  -3    3.13    2.26
   9   0  -2  169.56    5.95
   9   9   1    0.62    0.65
   9   0  -1    7.52    2.56
   9   9   0    0.09    1.03
   9   9   0   16.47    2.12
   9   0   0   17.98    3.07
   9   9  -1   12.54    2.71
   9   9  -1   14.18    2.03
   9   0   1   10.69    2.69
   9   9  -2   -0.16    2.02
   9   9  -2    0.16    1.39
   9   0   2    0.69    2.22
   9   9  -3    1.72    2.14
   9   9  -3    1.89    1.48
   9   0   3    0.53    2.28
   9   9  -4    2.29    2.17
   9   9  -4    4.59    1.67
   9   0   4    3.65    2.38
   9   9  -5   47.64    4.00
   9   9  -5   41.78    3.33
   9   0   5   39.58    4.06
   9   9  -6    3.26    2.21
   9   9  -6    1.30    1.61
   9   0   6    4.22    2.49
   9   9  -7   69.90    4.46
   9   9  -7   68.77    3.89
   9   0   7   68.11    4.78
   9   9  -8   68.99    4.42
   9   9  -8   72.11    4.07
   9   0   8   73.84    5.02
   9   9  -9    1.75    2.01
   9   9  -9    1.51    1.75
   9   0   9    0.31    2.48
   9   9 -10    0.04    1.88
   9   9 -10    0.96    1.73
   9   0  10   -1.24    2.33
   9   9 -11    6.52    2.18
   9   9 -11    6.90    2.20
   9   0  11    4.00    2.61
   9   9 -12   35.97    3.52
   9   9 -12   31.44    3.55
   9   0  12   33.12    3.99
   9   9 -13   11.48    2.38
   9   9 -13   14.85    2.76
   9   0  13   16.88    3.20
   9   9 -14   30.29    3.36
   9   9 -14   35.52    3.82
   9   0  14   36.46    4.30
  -9   0 -15    4.30    2.08
   9   9 -15   12.41    2.74
   9   0  15    9.78    3.01
  -9   0 -16   24.84    3.39
   9   9 -16   64.53    4.70
   9   0  16   63.13    5.05
  -9   0 -17    3.18    2.05
   9   9 -17    5.65    2.45
   9   0  17    7.37    3.07
  -9   0 -18   60.67    4.63
   9   9 -18  136.72    6.43
   9   0  18  131.45    6.45
  -9   0 -19    0.61    1.85
   9   9 -19   -1.66    2.01
   9   0  19    0.89    2.67
  -9   0 -20    0.34    1.90
   9   9 -20    4.49    2.55
  -9   0 -21    1.70    2.15
   9   9 -21   -0.28    2.32
  -9   0 -22   12.54    3.16
   9   9 -22   25.33    4.01
  -9   0 -23   -0.29    2.10
   9   9 -23    0.95    2.56
  -9   0 -24    1.13    2.31
   9   9 -24    5.04    2.89
  -9   0 -25    5.96    2.82
  11   1 -22   -0.44    2.83
  11   1 -21   10.55    3.58
  11   1 -20    8.70    3.30
  11   1 -19    4.45    2.94
  11   1 -18   59.17    5.34
 -11 -10 -17    9.09    2.96
  11   1 -17    4.65    2.81
  11  10  16    4.40    2.69
 -11 -10 -16    4.89    2.79
  11   1 -16    2.39    2.60
  11  10  15  161.58    6.81
 -11 -10 -15  128.63    6.52
  11   1 -15  134.56    6.81
  11  10  14    2.86    2.45
  11   1 -14    0.67    2.46
  11  10  13    2.99    2.54
  11   1 -13    2.80    2.37
  11  10  12    3.07    2.56
  11   1 -12    0.95    2.29
  11  10  11  286.18    8.51
  11   1 -11  231.08    8.05
  11  10  10    0.47    2.44
  11   1 -10    1.00    2.14
  11  10   9  126.31    6.07
  11   1  -9  135.97    5.73
  11   1  -9   88.55    5.38
  11  10   8    0.40    2.34
  11   1  -8    2.65    2.35
  11   1  -8    3.52    2.11
  11  10   7   15.32    3.19
  11   1  -7   20.84    3.26
  11   1  -7   12.58    2.87
  11  10   6   34.47    3.98
  11   1  -6   32.58    3.87
  11   1  -6   26.26    3.48
  11  10   5    4.36    2.47
  11   1  -5   -0.70    2.27
  11   1  -5    0.95    1.99
  11  10   4   24.90    3.60
  11   1  -4   30.47    3.72
  11  10   3    9.22    2.78
  11   1  -3    6.93    2.75
  11  10   2    7.24    2.60
  11   1  -2    9.78    2.85
  11  10   1    1.10    2.27
  11   1  -1    2.31    2.54
  11  10   0   44.99    4.15
  11   1   0   40.71    4.31
  11  10  -1   46.20    4.24
  11   1   1   49.17    4.53
  11  10  -2    4.81    2.47
  11   1   2    3.00    2.58
  11  10  -3   28.69    3.67
  11   1   3   32.58    4.10
  11  10  -4    9.32    2.79
  11   1   4    7.70    2.88
  11  10  -5   10.04    2.70
  11   1   5   12.04    3.07
  11  10  -6    8.49    2.63
  11   1   6    6.71    2.75
  11  10  -7   16.06    3.04
  11   1   7   14.37    3.20
  11  10  -8    2.66    2.21
  11  10  -8    3.61    1.97
  11   1   8    3.74    2.72
  11  10  -9   17.95    3.03
  11  10  -9   21.31    3.06
  11   1   9   14.99    3.44
  11  10 -10   21.60    3.20
  11  10 -10   18.48    2.95
  11   1  10   19.59    3.60
  11  10 -11   19.87    3.17
  11  10 -11   18.02    2.99
  11   1  11   19.18    3.69
  11  10 -12   -0.59    2.05
  11  10 -12    2.27    1.99
  11   1  12   -0.12    2.59
  11  10 -13    9.68    2.62
  11  10 -13    9.37    2.65
  11   1  13    9.64    3.24
  11  10 -14   20.95    3.31
  11   1  14   21.89    3.92
  11  10 -15  226.89    7.83
  11   1  15  225.25    8.34
  11  10 -16   96.49    5.74
  11   1  16  100.49    6.21
  11  10 -17   87.08    5.67
  11   1  17   81.56    5.88
  11  10 -18    6.19    2.76
  11   1  18    6.13    3.30
  11  10 -19   98.08    6.19
  11   1  19   86.06    6.17
  11  10 -20   10.42    3.22
  11   1  20    3.67    3.33
  11  10 -21   11.07    3.32
  11  10 -22   11.51    3.59
  13   2 -19    2.37    3.17
  13   2 -18    4.30    3.11
  13   2 -17   19.12    4.06
  13  11  16   25.96    4.32
  13   2 -16   17.22    3.94
  13  11  15    3.05    2.91
  13   2 -15    2.25    2.83
  13  11  14    2.32    2.87
  13   2 -14    2.67    2.80
  13  11  13   21.55    3.95
  13   2 -13   16.98    3.71
  13  11  12   34.77    4.54
  13   2 -12   24.61    4.02
  13  11  11   45.06    4.75
  13   2 -11   39.66    4.64
  13  11  10    4.11    2.86
  13   2 -10    1.69    2.46
  13  11   9   78.19    5.63
  13   2  -9   60.03    5.16
  13  11   8   11.32    3.30
  13   2  -8   12.92    3.21
  13   2  -8    6.05    2.71
  13  11   7   12.77    3.35
  13   2  -7   15.03    3.38
  13   2  -7    9.80    2.96
  13  11   6    1.66    2.58
  13   2  -6    0.93    2.62
  13   2  -6   -0.72    2.08
  13  11   5    1.79    2.66
  13   2  -5    2.13    2.67
  13   2  -5    3.26    2.40
  13  11   4   16.88    3.48
  13   2  -4   13.11    3.32
  13   2  -4   11.47    3.06
  13  11   3    0.54    2.55
  13   2  -3   -3.66    2.47
  13  11   2    6.23    2.80
  13   2  -2    7.59    3.04
  13  11   1   50.18    4.69
  13   2  -1   52.19    4.89
  13  11   0    2.59    2.56
  13   2   0   -1.65    2.61
  13  11  -1    8.71    2.92
  13   2   1    7.36    3.12
  13  11  -2   15.05    3.37
  13   2   2   22.70    3.93
  13  11  -3   15.95    3.43
  13   2   3   15.51    3.62
  13  11  -4   42.51    4.52
  13   2   4   43.03    4.72
  13  11  -5   18.03    3.43
  13   2   5   13.74    3.54
  13  11  -6   11.90    3.14
  13   2   6    9.50    3.32
  13  11  -7  109.21    6.02
  13   2   7  110.07    6.39
  13  11  -8    1.79    2.47
  13   2   8    1.37    2.84
  13  11  -9   13.71    3.21
  13   2   9   12.84    3.67
  13  11 -10    5.01    2.58
  13   2  10    5.14    3.14
  13  11 -11   45.72    4.50
  13   2  11   42.41    5.03
  13  11 -12    0.88    2.41
  13   2  12    0.10    2.90
  13   2  13   -0.16    3.04
  13   2  14   24.74    4.58
  13   2  15    9.71    3.76
  13   2  16   30.51    4.99
  15   3 -13   -0.46    2.80
  15   3 -12   32.24    4.91
  15   3 -11   61.21    5.85
  15   3 -10    7.41    3.30
  15   3  -9   43.95    5.23
  15  12   8    9.03    3.56
  15   3  -8    5.71    3.05
  15  12   7   37.26    4.97
  15   3  -7   36.69    4.76
  15   3  -7   28.51    4.49
  15  12   6    5.64    3.14
  15   3  -6    3.58    3.16
  15   3  -6    2.09    2.68
  15  12   5    0.31    2.69
  15   3  -5   -0.23    2.96
  15   3  -5   -1.91    2.44
  15  12   4   -2.35    2.48
  15   3  -4   -0.93    2.82
  15   3  -4    1.63    2.61
  15  12   3    6.83    3.19
  15   3  -3    5.27    3.31
  15   3  -3    4.14    2.76
  15  12   2    2.96    2.86
  15   3  -2   -0.05    2.92
  15   3  -2   -1.24    2.22
  15  12   1   33.89    4.66
  15   3  -1   36.45    4.84
  15  12   0    6.68    3.19
  15   3   0   10.47    3.64
  15  12  -1    6.13    3.11
  15   3   1    3.59    3.27
  15  12  -2   80.19    5.89
  15   3   2   86.62    6.25
  15  12  -3    4.43    2.94
  15   3   3    5.35    3.39
  15  12  -4   16.62    3.74
  15   3   4   14.07    3.99
  15  12  -5    3.54    2.87
  15   3   5   -0.60    3.04
  15  12  -6    2.21    2.88
  15   3   6    0.02    3.13
  15  12  -7    0.58    2.55
  15   3   7    2.49    3.23
  15  12  -8   28.18    4.27
  15  12  -9   23.22    4.03
  15  12 -10    8.09    3.20
  15  12 -11    3.44    2.85
   0  -5 -29   -0.08    2.31
   0  -5 -28    0.64    2.27
   0  -5 -27    1.17    2.28
   0  -5 -27    1.38    2.63
   0  -5 -26   78.04    5.35
   0  -5 -26   47.14    5.02
   0  -5 -25    1.11    2.11
   0  -5 -25    0.80    2.39
   0  -5 -24   11.68    2.83
   0  -5 -24    7.34    2.75
   0  -5 -23    1.22    1.98
   0  -5 -23    0.54    2.24
   0  -5 -22   -0.96    1.67
   0  -5 -22   -0.24    2.11
   0  -5 -21   -2.41    1.54
   0  -5 -21    1.72    2.03
   0  -5 -20    0.03    1.70
   0  -5 -20    1.66    2.02
   0  -5 -19   -0.21    1.69
   0  -5 -19    0.06    1.92
   0  -5 -18   81.77    4.52
   0  -5 -18   48.25    4.33
   0  -5 -17    0.02    1.63
   0  -5 -17    0.41    1.89
   0  -5 -16    8.91    2.11
   0  -5 -16    5.09    2.05
   0  -5 -15   -0.35    1.44
   0  -5 -15   -0.53    1.60
   0  -5 -14 1337.35   13.08
   0  -5 -14  812.87   11.01
   0  -5 -13    0.35    1.26
   0  -5 -13    3.55    1.62
   0  -5 -12  557.34    7.86
   0  -5 -12  324.25    6.77
   0  -5 -11    0.56    1.05
   0  -5 -11   -0.02    1.24
   0  -5 -10    4.97    1.28
   0  -5 -10    4.39    1.44
   0   5   9    0.13    0.63
   0  -5  -9   -0.64    0.96
   0  -5  -9   -0.16    1.11
   0   5   8    5.85    0.85
   0  -5  -8   12.11    1.43
   0  -5  -8    4.75    1.15
   0   5   7    0.64    0.69
   0  -5  -7   -0.37    0.71
   0  -5  -7    0.33    0.27
   0   5   6    1.70    0.78
   0  -5  -6    6.09    1.00
   0  -5  -6    2.87    1.10
   0   5   5   -0.02    0.76
   0  -5  -5    0.36    0.67
   0  -5  -5    0.47    0.98
   0   5   4   80.10    2.26
   0  -5  -4  189.32    2.94
   0  -5  -4   96.73    3.11
   0   5   3   -0.17    0.80
   0  -5  -3    0.48    0.61
   0  -5  -3   -0.41    0.87
   0   5   2   97.36    2.60
   0  -5  -2   95.54    2.91
   0   5   1   -0.28    0.88
   0  -5  -1   -0.57    0.85
   0   5   0  102.25    2.78
   0  -5   0  114.62    2.74
   0   5  -1    0.36    0.55
   0  -5   1    0.60    0.76
   0   5  -2    0.08    0.20
   0   5  -2   33.51    1.48
   0  -5   2   28.41    1.63
   0   5  -3    0.53    0.92
   0   5  -3    0.76    0.60
   0   5  -4    2.85    1.08
   0   5  -4    9.51    1.10
   0   5  -5    0.31    0.95
   0   5  -5    0.40    0.65
   0   5  -6    9.17    1.43
   0   5  -6   19.66    1.68
   0   5  -7    0.57    0.97
   0   5  -7    0.05    0.44
   0   5  -8   16.25    1.93
   0   5  -8   28.84    2.18
   0   5  -9    0.73    1.05
   0   5  -9    0.03    0.90
   0   5 -10  233.34    4.88
   0   5 -10  342.54    6.19
   0   5 -11    0.39    1.04
   0   5 -11    0.26    1.05
   0   5 -12   13.01    1.74
   0   5 -12   20.92    2.34
   0   5 -13   -0.84    1.07
   0   5 -13    0.60    1.22
   0   5 -14    1.80    1.35
   0   5 -14   -0.15    1.31
   0   5 -15    0.34    1.27
   0   5 -15   -0.49    1.37
   0   5 -16   39.61    2.90
   0   5 -16   43.36    3.71
   0   5 -17    1.23    1.52
   0   5 -17   -0.36    1.65
   0   5 -18   29.00    3.55
   0   5 -19    0.27    1.68
   0   5 -20  205.66    7.09
   0   5 -21    0.32    1.74
   0   5 -22   12.78    2.76
   0   5 -23    0.75    1.97
   0   5 -24   29.23    4.00
   0   5 -25    0.73    2.16
   0   5 -26   10.85    2.97
   0   5 -27   -0.69    2.09
   0   5 -28    9.49    3.07
   0   5 -29    1.02    2.53
  -2  -6 -29    0.99    2.17
   2  -4 -29    0.30    2.57
  -2  -6 -28   16.01    3.34
   2  -4 -28   17.40    3.65
   2  -4 -28   14.45    3.62
  -2  -6 -27    2.61    2.30
   2  -4 -27    2.14    2.49
   2  -4 -27    3.45    2.72
  -2  -6 -26   33.58    4.00
   2  -4 -26   31.04    4.18
   2  -4 -26   22.66    3.85
  -2  -6 -25   12.93    2.81
  -2  -6 -25    7.93    2.98
   2  -4 -25   17.02    3.35
   2  -4 -25   14.05    3.27
  -2  -6 -24    7.37    2.42
  -2  -6 -24    4.51    2.60
   2  -4 -24    9.58    2.79
   2  -4 -24    4.95    2.65
  -2  -6 -23    1.85    1.91
  -2  -6 -23   -1.62    2.15
   2  -4 -23    2.52    2.15
  -2  -6 -22   21.66    3.18
  -2  -6 -22   11.48    2.82
   2  -4 -22   19.65    3.28
  -2  -6 -21    1.44    1.81
  -2  -6 -21    3.35    2.27
   2  -4 -21    6.39    2.37
  -2  -6 -20   13.74    2.53
  -2  -6 -20    8.63    2.52
   2  -4 -20   18.93    3.00
  -2  -6 -19   27.38    3.12
  -2  -6 -19   20.94    3.02
   2  -4 -19   35.11    3.67
  -2  -6 -18   -0.16    1.60
  -2  -6 -18   -1.70    1.84
   2  -4 -18    1.07    1.89
  -2  -6 -17   16.83    2.54
  -2  -6 -17    9.61    2.37
   2  -4 -17   23.21    3.12
  -2  -6 -16  143.08    4.97
  -2  -6 -16   85.35    4.76
   2  -4 -16  174.59    5.80
  -2  -6 -15    3.47    1.60
  -2  -6 -15    2.36    1.83
   2  -4 -15    6.55    1.97
  -2  -6 -14   24.53    2.58
  -2  -6 -14   14.75    2.40
   2  -4 -14   33.85    3.24
  -2  -6 -13    6.92    1.60
  -2  -6 -13    2.78    1.60
   2  -4 -13    7.99    1.86
   2   6  12   35.49    1.96
  -2  -6 -12   21.69    2.21
  -2  -6 -12   12.25    2.03
   2  -4 -12   26.95    2.79
   2   6  11   -0.34    0.89
  -2  -6 -11    0.09    0.95
  -2  -6 -11   -0.43    1.24
   2  -4 -11    1.02    1.22
   2   6  10    5.22    1.11
  -2  -6 -10    3.20    1.08
  -2  -6 -10    1.76    1.28
   2  -4 -10    3.97    1.35
   2   6   9   53.91    2.26
  -2  -6  -9   33.17    2.04
  -2  -6  -9   17.91    2.03
   2  -4  -9   40.00    2.58
   2   6   8    3.36    1.06
  -2  -6  -8    2.12    0.87
  -2  -6  -8    2.34    1.20
   2  -4  -8    4.51    0.86
   2  -4  -8    3.34    1.20
  -2   4   7  110.30    2.28
   2   6   7  111.56    2.88
  -2  -6  -7   71.00    2.20
  -2  -6  -7   37.95    2.65
   2  -4  -7   82.60    2.98
  -2   4   6   12.06    1.29
   2   6   6   12.68    1.56
  -2  -6  -6    8.17    0.95
  -2  -6  -6   -0.30    0.32
   2  -4  -6   10.15    1.35
  -2   4   5    9.53    1.10
   2   6   5    9.81    1.29
  -2  -6  -5    6.74    0.79
  -2  -6  -5   -0.43    0.45
   2  -4  -5    8.58    1.26
  -2   4   4   85.70    2.36
   2   6   4   89.08    2.71
  -2  -6  -4   35.76    2.38
   2  -4  -4   62.53    2.44
  -2   4   3   46.06    1.96
   2   6   3   47.79    2.26
  -2  -6  -3   23.51    2.11
  -2   4   2    0.62    0.84
   2   6   2    0.28    0.90
  -2  -6  -2    0.62    0.92
  -2   4   1   42.44    2.05
   2   6   1   46.89    2.26
  -2  -6  -1   32.59    2.24
  -2   4   0  254.98    4.24
   2   6   0    0.15    0.44
  -2  -6   0  221.38    4.04
  -2   4  -1   -0.07    0.58
   2   6  -1    0.47    0.28
  -2  -6   1    0.70    0.90
  -2   4  -2    0.03    0.34
   2   6  -2    4.16    0.91
  -2  -6   2   15.23    1.85
  -2   4  -3    0.05    0.21
  -2   4  -3    3.86    0.87
   2   6  -3    4.26    1.17
   2   6  -3    5.91    0.79
  -2  -6   3    6.38    1.10
  -2   4  -4    6.78    1.31
  -2   4  -4    1.68    0.72
   2   6  -4    5.56    1.25
   2   6  -4    8.83    1.01
  -2   4  -5    1.19    1.05
  -2   4  -5    0.35    0.46
   2   6  -5    0.33    0.99
   2   6  -5    1.89    0.76
  -2   4  -6    7.68    1.38
  -2   4  -6    6.06    1.12
   2   6  -6    3.30    1.16
   2   6  -6    7.50    1.12
  -2   4  -7   40.41    2.50
  -2   4  -7   32.70    2.20
   2   6  -7   16.68    1.93
   2   6  -7    2.54    0.69
  -2   4  -8   69.73    3.04
  -2   4  -8   53.70    2.71
   2   6  -8   23.56    2.18
   2   6  -8   71.60    2.85
  -2   4  -9    4.01    1.34
  -2   4  -9    2.63    1.08
   2   6  -9    2.29    1.19
   2   6  -9    3.18    1.15
  -2   4 -10    3.75    1.36
  -2   4 -10    3.35    1.25
   2   6 -10    1.82    1.15
   2   6 -10    3.84    1.28
  -2   4 -11   36.99    2.66
  -2   4 -11   30.19    2.59
   2   6 -11   11.89    1.69
   2   6 -11   35.87    2.73
  -2   4 -12  391.90    6.82
  -2   4 -12  352.50    7.08
   2   6 -12  154.47    4.27
   2   6 -12  396.84    7.23
  -2   4 -13    1.65    1.42
  -2   4 -13    2.92    1.48
   2   6 -13   -1.14    1.08
   2   6 -13    2.03    1.48
  -2   4 -14    1.84    1.49
  -2   4 -14   -1.21    1.28
   2   6 -14    1.95    1.34
   2   6 -14    0.73    1.40
  -2   4 -15    5.59    1.80
  -2   4 -15    6.15    1.88
   2   6 -15    4.25    1.51
   2   6 -15    5.94    1.89
  -2   4 -16    2.41    1.68
  -2   4 -16    1.73    1.66
   2   6 -16    1.64    1.40
   2   6 -16    2.00    1.67
  -2   4 -17    0.81    1.67
  -2   4 -17    0.74    1.77
   2   6 -17   -1.28    1.54
  -2   4 -18   73.72    3.96
  -2   4 -18   57.19    4.20
   2   6 -18   69.27    4.40
  -2   4 -19    5.64    2.13
   2   6 -19    7.12    2.15
  -2   4 -20   84.66    4.98
   2   6 -20  100.21    5.26
  -2   4 -21    2.73    1.95
   2   6 -21    1.43    1.91
  -2   4 -22  135.00    6.29
   2   6 -22  145.50    6.49
  -2   4 -23    1.34    2.05
   2   6 -23    3.42    2.27
  -2   4 -24    0.59    1.97
   2   6 -24   -0.25    1.98
  -2   4 -25    2.00    2.33
   2   6 -25    1.63    2.17
  -2   4 -26    1.82    2.27
   2   6 -26    2.46    2.36
  -2   4 -27    5.16    2.64
   2   6 -27    6.75    2.81
  -2   4 -28   16.81    3.62
   2   6 -28   17.75    3.68
  -2   4 -29    6.20    2.96
   2   6 -29    4.72    2.80
  -4  -7 -28    3.11    2.37
   4  -3 -28    2.32    2.74
  -4  -7 -27   41.04    4.44
   4  -3 -27   64.88    5.61
  -4  -7 -26   26.44    3.79
   4  -3 -26   41.41    4.82
  -4  -7 -25    2.93    2.10
   4  -3 -25    3.06    2.53
  -4  -7 -24    2.83    2.06
   4  -3 -24   -0.05    2.26
  -4  -7 -23    2.60    1.96
  -4  -7 -23    1.84    2.37
   4  -3 -23    2.58    2.36
  -4  -7 -22    4.90    2.10
  -4  -7 -22    2.78    2.36
   4  -3 -22    4.73    2.49
  -4  -7 -21   -0.54    1.54
  -4  -7 -21   -1.32    2.02
   4  -3 -21    2.18    2.15
  -4  -7 -20    2.80    1.77
  -4  -7 -20   -0.83    1.97
   4  -3 -20    3.35    2.12
  -4  -7 -19    9.68    2.16
  -4  -7 -19    4.81    2.31
   4  -3 -19   12.64    2.74
  -4  -7 -18    8.28    2.08
  -4  -7 -18    4.96    2.26
   4  -3 -18   13.33    2.70
  -4  -7 -17   24.01    2.98
  -4  -7 -17   16.67    2.83
   4  -3 -17   41.60    3.94
  -4  -7 -16    1.04    1.49
  -4  -7 -16    0.93    1.93
   4  -3 -16    2.99    2.06
  -4  -7 -15  150.80    4.86
  -4  -7 -15   94.26    4.89
   4  -3 -15  244.35    6.95
  -4  -7 -14  287.64    6.15
  -4  -7 -14  189.26    6.03
   4  -3 -14  493.02    9.23
   4   7  13   45.42    2.94
  -4  -7 -13   24.47    2.52
  -4  -7 -13   15.92    2.47
   4  -3 -13   33.66    3.31
   4   7  12  399.60    6.24
  -4  -7 -12  181.82    4.58
  -4  -7 -12  134.66    5.04
   4  -3 -12  296.77    6.84
   4   7  11  179.26    4.50
  -4  -7 -11   81.85    3.12
  -4  -7 -11   64.44    3.82
   4  -3 -11  138.11    4.81
   4   7  10   13.06    1.84
  -4  -7 -10    7.91    1.32
  -4  -7 -10    5.68    1.67
   4  -3 -10   14.25    1.38
   4  -3 -10   13.70    2.07
   4   7   9    4.55    1.44
  -4  -7  -9    3.31    0.95
  -4  -7  -9    2.33    1.38
   4  -3  -9    5.29    1.14
   4  -3  -9    4.84    1.51
   4   7   8    0.93    1.24
  -4  -7  -8    0.22    0.71
  -4  -7  -8    0.38    1.28
   4  -3  -8    0.42    1.02
   4  -3  -8    0.31    1.11
   4   7   7    5.36    1.46
  -4  -7  -7    3.01    0.80
  -4  -7  -7    4.20    1.46
   4  -3  -7    7.31    1.32
   4  -3  -7    4.80    1.35
   4   7   6   20.64    2.19
  -4  -7  -6    6.78    0.89
  -4  -7  -6   15.34    1.94
   4  -3  -6   26.68    2.23
   4  -3  -6   17.80    2.02
   4   7   5    8.64    1.58
  -4  -7  -5    2.48    0.62
  -4  -7  -5    3.73    1.32
   4  -3  -5    7.12    1.36
   4  -3  -5    4.67    1.31
   4   7   4  122.20    3.70
  -4  -7  -4   -0.27    0.26
   4  -3  -4  131.08    3.53
   4   7   3   21.17    2.23
  -4  -7  -3    7.93    1.41
   4  -3  -3   20.24    2.10
   4   7   2    0.76    1.17
  -4  -7  -2    1.00    1.12
   4  -3  -2   -0.29    1.18
   4   7   1   23.01    2.25
  -4  -7  -1   18.78    2.31
   4  -3  -1   24.66    2.40
   4   7   0   11.89    1.57
  -4  -7   0   11.07    1.60
   4  -3   0   10.53    1.69
   4   7  -1    0.48    0.26
  -4  -7   1   68.71    3.00
   4  -3   1   80.82    3.32
   4   7  -2    2.26    1.21
   4   7  -2    0.20    0.59
   4  -3   2    1.55    1.32
   4   7  -3   10.83    1.69
   4   7  -3   10.88    1.09
   4  -3   3   11.86    1.85
   4   7  -4   24.14    2.36
   4   7  -4   23.86    1.70
   4  -3   4    0.37    0.33
  -4   3  -5    2.68    1.01
   4   7  -5    5.11    1.47
   4   7  -5    5.86    1.10
   4  -3   5    6.28    1.67
  -4   3  -6    8.47    1.40
   4   7  -6   16.55    1.96
   4   7  -6   18.43    1.65
   4  -3   6   20.89    2.32
  -4   3  -7   11.48    1.64
   4   7  -7   17.20    1.99
   4   7  -7   13.60    1.54
   4  -3   7   20.83    2.36
  -4   3  -8   86.13    3.51
   4   7  -8  119.33    3.87
   4   7  -8  147.04    3.93
   4  -3   8  155.93    4.79
  -4   3  -9   11.19    1.72
   4   7  -9   12.16    1.83
   4   7  -9   17.64    2.16
   4  -3   9   19.85    2.49
  -4   3 -10  207.93    5.51
   4   7 -10  191.10    4.84
   4   7 -10  307.05    6.03
   4  -3  10  320.21    6.70
  -4   3 -11    1.47    1.18
   4   7 -11    0.84    1.26
   4   7 -11    2.09    1.33
   4  -3  11    2.40    1.79
  -4   3 -12    0.17    0.41
   4   7 -12    7.88    1.68
   4   7 -12   17.06    2.30
   4  -3  12   16.67    2.55
  -4   3 -13    0.34    0.51
   4   7 -13    7.12    1.69
   4   7 -13   19.05    2.47
   4  -3  13   18.88    2.75
  -4   3 -14    0.57    0.63
   4   7 -14   -0.31    1.27
   4   7 -14    1.97    1.64
   4  -3  14    2.81    2.07
  -4   3 -15    5.79    1.90
   4   7 -15    1.99    1.46
   4   7 -15    6.00    1.98
   4  -3  15    7.96    2.39
  -4   3 -16   35.82    3.53
   4   7 -16   17.04    2.27
   4   7 -16   44.40    3.75
   4  -3  16   47.77    4.06
  -4   3 -17    4.53    1.97
   4   7 -17    5.34    2.09
   4  -3  17    5.52    2.43
  -4   3 -18    8.27    2.29
   4   7 -18   10.10    2.42
   4  -3  18   14.68    2.76
  -4   3 -19    7.28    2.28
   4   7 -19    7.65    2.33
  -4   3 -20   39.48    3.89
   4   7 -20   51.66    4.25
  -4   3 -21   44.32    4.15
   4   7 -21   56.94    4.53
  -4   3 -22   26.75    3.78
   4   7 -22   38.71    4.18
  -4   3 -23    1.76    2.07
   4   7 -23    1.53    2.14
  -4   3 -24    7.67    2.65
   4   7 -24    8.92    2.80
  -4   3 -25    3.21    2.28
   4   7 -25    4.23    2.54
  -4   3 -26   17.34    3.51
   4   7 -26   26.40    4.06
  -4   3 -27    1.34    2.35
   4   7 -27    2.28    2.51
  -4   3 -28   24.13    4.14
   4   7 -28   29.02    4.35
   6  -2 -27    4.43    3.05
   6  -2 -26    1.16    2.69
   6  -2 -25   63.04    5.56
   6  -2 -24   46.57    4.94
   6  -2 -23    4.18    2.55
  -6  -8 -22   61.05    4.92
   6  -2 -22   86.80    5.68
  -6  -8 -21   -0.09    1.60
  -6  -8 -21    0.56    2.32
   6  -2 -21    0.36    2.14
  -6  -8 -20    1.83    1.73
  -6  -8 -20    1.70    2.30
   6  -2 -20    7.95    2.68
  -6  -8 -19   56.04    3.82
  -6  -8 -19   87.78    5.13
   6  -2 -19  131.13    6.21
  -6  -8 -18    2.90    1.59
  -6  -8 -18    4.13    2.31
   6  -2 -18    2.25    2.18
  -6  -8 -17   33.03    3.00
  -6  -8 -17   59.04    4.45
   6  -2 -17   83.99    5.02
  -6  -8 -16   14.04    2.25
  -6  -8 -16   23.89    3.25
   6  -2 -16   33.57    3.81
  -6  -8 -15   11.94    2.08
  -6  -8 -15   18.35    2.93
   6  -2 -15   35.06    3.79
   6   8  14  124.92    4.81
  -6  -8 -14   35.75    2.89
  -6  -8 -14   69.27    4.63
   6  -2 -14   87.06    5.00
   6   8  13    1.10    1.87
  -6  -8 -13    0.12    1.20
  -6  -8 -13   -0.12    1.90
   6  -2 -13    1.13    1.87
   6   8  12    0.02    1.79
  -6  -8 -12    0.62    1.13
  -6  -8 -12    0.19    1.89
   6  -2 -12    2.21    1.86
   6   8  11    7.93    2.13
  -6  -8 -11    3.17    1.25
  -6  -8 -11    4.48    2.03
   6  -2 -11    6.44    2.02
   6   8  10   74.62    3.93
  -6  -8 -10   27.83    2.20
  -6  -8 -10   50.59    3.89
   6  -2 -10   81.90    3.28
   6  -2 -10   56.76    3.83
   6   8   9   21.78    2.64
  -6  -8  -9    7.85    1.31
  -6  -8  -9   15.11    2.43
   6  -2  -9   21.90    2.18
   6  -2  -9   16.27    2.43
   6   8   8   15.49    2.36
  -6  -8  -8    6.34    1.17
  -6  -8  -8   11.13    2.19
   6  -2  -8   17.08    2.08
   6  -2  -8   13.22    2.17
   6   8   7  120.60    4.39
  -6  -8  -7   93.89    4.37
   6  -2  -7  129.01    4.01
   6  -2  -7   90.56    4.12
   6   8   6   55.75    3.41
  -6  -8  -6   42.20    3.37
   6  -2  -6   53.99    3.06
   6  -2  -6   34.86    2.98
   6   8   5  188.14    5.20
  -6  -8  -5  150.86    4.99
   6  -2  -5  190.92    4.78
   6  -2  -5  128.66    4.57
   6   8   4    4.07    1.68
  -6  -8  -4    2.30    1.51
   6  -2  -4    3.40    1.60
   6   8   3  136.58    4.56
  -6  -8  -3  108.18    4.10
   6  -2  -3  136.94    4.41
   6   8   2    0.77    1.48
  -6  -8  -2    0.04    0.32
   6  -2  -2   -0.82    1.45
   6   8   1  164.28    4.88
   6  -2  -1  165.28    4.81
   6   8   0    0.49    0.42
   6   8   0   21.88    1.73
   6  -2   0   29.09    2.94
   6   8  -1   97.78    3.93
   6   8  -1   79.99    2.52
   6  -2   1   96.34    4.03
   6   8  -2   54.71    3.37
   6   8  -2   51.76    2.30
   6  -2   2   54.78    3.36
   6   8  -3   47.83    3.25
   6   8  -3   41.73    2.24
   6  -2   3   44.28    3.33
   6   8  -4   10.08    2.00
   6   8  -4    1.35    0.66
   6  -2   4    8.85    1.93
   6   8  -5   12.22    2.07
   6   8  -5    6.36    1.23
   6  -2   5    1.61    0.95
   6   8  -6    2.08    1.54
   6   8  -6    1.99    1.14
   6  -2   6    3.42    1.82
   6   8  -7   42.18    3.14
   6   8  -7   42.46    2.76
   6  -2   7   45.29    3.50
  -6   2  -8    0.40    0.39
   6   8  -8   11.15    2.05
   6   8  -8    9.49    1.71
   6  -2   8   12.73    2.41
  -6   2  -9    0.49    0.44
   6   8  -9   14.30    2.20
   6   8  -9   17.08    2.17
   6  -2   9   15.27    2.65
  -6   2 -10    0.42    0.50
   6   8 -10    0.60    1.51
   6   8 -10    1.65    1.45
   6  -2  10    0.36    2.04
  -6   2 -11    0.98    0.68
   6   8 -11  141.98    4.82
   6   8 -11  176.18    5.30
   6  -2  11  184.60    6.09
  -6   2 -12   29.00    2.80
   6   8 -12   46.87    3.29
   6   8 -12   59.39    3.75
   6  -2  12   67.88    4.42
  -6   2 -13   36.50    3.38
   6   8 -13   47.39    3.33
   6   8 -13   64.88    4.02
   6  -2  13   67.36    4.56
  -6   2 -14    5.23    1.93
   6   8 -14    5.24    1.84
   6   8 -14    8.08    2.22
   6  -2  14    7.25    2.64
  -6   2 -15   16.05    2.69
   6   8 -15   12.74    2.21
   6   8 -15   22.80    3.02
   6  -2  15   27.74    3.52
  -6   2 -16   -0.59    1.47
   6   8 -16   -0.17    1.73
   6  -2  16    0.01    2.17
  -6   2 -17    1.49    1.71
   6   8 -17    2.39    1.89
   6  -2  17    1.39    2.26
  -6   2 -18   10.18    2.46
   6   8 -18   19.73    3.06
   6  -2  18   19.91    3.25
  -6   2 -19    0.24    1.72
   6   8 -19    2.95    2.12
   6  -2  19    1.83    2.41
  -6   2 -20   84.69    5.21
   6   8 -20  138.83    6.31
  -6   2 -21   12.96    2.88
   6   8 -21   22.85    3.55
  -6   2 -22   63.38    4.88
   6   8 -22   95.98    5.81
  -6   2 -23    8.74    2.72
   6   8 -23   17.95    3.43
  -6   2 -24    4.78    2.44
   6   8 -24    6.25    2.71
  -6   2 -25    3.89    2.55
   6   8 -25    7.66    2.83
  -6   2 -26    3.40    2.62
   6   8 -26    8.67    2.97
  -6   2 -27    3.96    2.58
   6   8 -27    4.03    2.78
   8  -1 -26    1.38    2.86
   8  -1 -25   -1.13    2.63
   8  -1 -24    2.61    2.79
   8  -1 -23    9.96    3.25
   8  -1 -22    9.23    3.13
   8  -1 -21    7.23    2.85
  -8  -9 -20    1.41    2.51
   8  -1 -20    1.41    2.30
  -8  -9 -19    4.41    2.68
   8  -1 -19    5.19    2.59
  -8  -9 -18   19.86    3.38
   8  -1 -18   20.71    3.51
  -8  -9 -17   28.09    3.68
   8  -1 -17   30.85    3.98
  -8  -9 -16   27.21    3.50
   8  -1 -16   36.94    4.08
   8   9  15  190.12    6.25
  -8  -9 -15  142.84    6.14
   8  -1 -15  157.89    6.54
   8   9  14   10.63    2.62
  -8  -9 -14    7.65    2.48
   8  -1 -14   10.33    2.61
   8   9  13   71.22    4.43
  -8  -9 -13   45.15    4.27
   8  -1 -13   55.67    4.45
   8   9  12   30.35    3.69
  -8  -9 -12   24.83    3.41
   8  -1 -12   27.01    3.44
   8   9  11  137.85    5.57
  -8  -9 -11  107.88    5.47
   8  -1 -11  105.61    5.33
   8   9  10   40.31    3.94
  -8  -9 -10   24.95    3.23
   8  -1 -10   34.17    3.75
   8   9   9    6.18    2.45
  -8  -9  -9    5.09    2.33
   8  -1  -9    7.14    2.16
   8  -1  -9    5.78    2.07
   8   9   8    0.35    2.10
  -8  -9  -8   -1.17    1.89
   8  -1  -8    1.09    1.91
   8  -1  -8    0.50    1.41
   8   9   7    2.46    2.10
  -8  -9  -7    0.57    2.02
   8  -1  -7    2.98    2.05
   8  -1  -7    0.02    0.66
   8   9   6   45.85    3.92
  -8  -9  -6   43.13    4.05
   8  -1  -6   49.17    3.74
   8  -1  -6   -0.22    0.51
   8   9   5   -0.69    1.94
  -8  -9  -5   -2.39    1.77
   8  -1  -5   -0.12    1.90
   8  -1  -5    0.64    0.60
   8   9   4  130.12    5.20
   8  -1  -4  129.47    5.01
   8   9   3   33.28    3.44
   8  -1  -3   37.53    3.56
   8   9   2  120.58    4.76
   8  -1  -2  134.03    5.18
   8   9   1    0.63    0.59
   8  -1  -1   46.72    3.83
   8   9   0    0.32    0.45
   8   9   0    3.06    1.34
   8  -1   0    5.43    2.31
   8   9  -1    1.10    0.87
   8   9  -1   44.19    2.78
   8  -1   1   48.61    4.05
   8   9  -2  140.95    5.38
   8   9  -2  126.40    3.88
   8  -1   2  132.72    5.38
   8   9  -3   72.86    4.21
   8   9  -3   65.37    3.22
   8  -1   3   64.56    4.39
   8   9  -4   24.85    3.03
   8   9  -4   28.03    2.70
   8  -1   4   -0.17    0.81
   8   9  -5    1.47    2.01
   8   9  -5    3.99    1.51
   8  -1   5   -0.16    0.67
   8   9  -6   14.10    2.68
   8   9  -6   12.77    2.00
   8  -1   6    0.38    0.87
   8   9  -7   16.15    2.66
   8   9  -7   15.50    2.20
   8  -1   7   16.84    3.05
   8   9  -8   80.97    4.42
   8   9  -8   91.24    4.11
   8  -1   8   93.17    5.05
   8   9  -9   28.19    3.31
   8   9  -9   33.87    3.32
   8  -1   9   34.28    4.05
   8   9 -10  150.98    5.51
   8   9 -10  170.05    5.56
   8  -1  10  175.24    6.48
   8   9 -11    3.68    1.98
   8   9 -11    5.03    1.98
   8  -1  11    4.61    2.71
  -8   1 -12    9.95    2.22
   8   9 -12   21.00    2.80
   8   9 -12   27.32    3.41
   8  -1  12   29.17    3.74
  -8   1 -13    3.84    1.79
   8   9 -13   11.20    2.36
   8   9 -13   13.81    2.53
   8  -1  13   10.32    2.90
  -8   1 -14   20.72    2.93
   8   9 -14   43.76    3.50
   8   9 -14   54.59    4.06
   8  -1  14   52.11    4.57
  -8   1 -15   -0.28    1.63
   8   9 -15    3.28    2.02
   8  -1  15    1.91    2.43
  -8   1 -16    5.85    2.09
   8   9 -16   14.17    2.76
   8  -1  16   14.75    3.17
  -8   1 -17   16.41    2.92
   8   9 -17   30.18    3.67
   8  -1  17   27.09    3.85
  -8   1 -18    2.64    2.03
   8   9 -18    6.32    2.50
   8  -1  18    6.50    2.90
  -8   1 -19   12.33    2.87
   8   9 -19   29.64    3.85
   8  -1  19   27.05    3.96
  -8   1 -20    1.71    2.01
   8   9 -20   -0.50    2.09
  -8   1 -21   15.13    3.04
   8   9 -21   28.68    3.94
  -8   1 -22    1.36    2.08
   8   9 -22   -0.19    2.22
  -8   1 -23    0.67    2.10
   8   9 -23    2.57    2.49
  -8   1 -24    5.70    2.67
   8   9 -24    3.60    2.70
  -8   1 -25    3.41    2.45
   8   9 -25   -1.26    2.39
  10   0 -23   14.62    3.83
  10   0 -22  126.97    7.35
  10   0 -21    0.19    2.67
  10   0 -20   43.69    4.94
  10   0 -19    6.67    2.95
 -10 -10 -18   10.80    3.05
  10   0 -18    8.83    3.02
 -10 -10 -17   28.48    3.95
  10   0 -17   27.95    4.12
 -10 -10 -16   15.96    3.30
  10   0 -16   17.02    3.49
  10  10  15   11.46    2.94
 -10 -10 -15    8.57    2.78
  10   0 -15    5.18    2.67
  10  10  14   39.95    4.19
 -10 -10 -14   27.14    3.71
  10   0 -14   28.87    3.91
  10  10  13   15.04    3.20
 -10 -10 -13    8.92    2.79
  10   0 -13   10.49    2.82
  10  10  12   10.89    2.91
 -10 -10 -12   10.33    2.75
  10   0 -12    9.24    2.67
  10  10  11    6.66    2.56
 -10 -10 -11    3.07    2.42
  10   0 -11    4.31    2.28
  10  10  10  128.75    5.81
 -10 -10 -10  107.24    5.63
  10   0 -10   93.58    5.38
  10  10   9    5.34    2.53
  10   0  -9    3.74    2.25
  10   0  -9    1.68    2.01
  10  10   8   20.52    3.38
  10   0  -8   27.92    3.31
  10   0  -8   15.39    2.84
  10  10   7   11.22    2.94
  10   0  -7   11.64    2.73
  10   0  -7    5.89    2.25
  10  10   6   83.19    5.04
  10   0  -6   79.61    4.66
  10   0  -6   52.43    4.39
  10  10   5  159.76    6.33
  10   0  -5  159.12    5.95
  10   0  -5  102.13    5.50
  10  10   4  312.92    8.33
  10   0  -4  308.93    7.93
  10  10   3   73.20    4.79
  10   0  -3   73.46    4.92
  10  10   2   21.19    3.32
  10   0  -2   21.64    3.38
  10  10   1  165.80    6.30
  10   0  -1  173.15    6.48
  10  10   0   19.46    3.17
  10   0   0   19.36    3.32
  10  10  -1   74.83    4.81
  10   0   1   70.02    4.91
  10  10  -2   14.86    3.03
  10   0   2   19.17    3.34
  10  10  -3  263.30    7.64
  10   0   3  260.12    7.81
  10  10  -4    8.73    2.67
  10   0   4    7.16    2.84
  10  10  -5   53.00    4.36
  10   0   5   54.02    4.54
  10  10  -6    1.39    2.18
  10  10  -6    1.61    1.67
  10   0   6    0.25    2.38
  10  10  -7  106.62    5.31
  10  10  -7  106.01    4.64
  10   0   7  109.91    5.73
  10  10  -8   16.43    2.93
  10  10  -8   20.41    2.71
  10   0   8   19.75    3.41
  10  10  -9    4.40    2.21
  10  10  -9    7.27    2.11
  10   0   9    4.61    2.77
  10  10 -10   38.05    3.75
  10  10 -10   45.35    3.81
  10   0  10   47.07    4.60
  10  10 -11   67.87    4.42
  10  10 -11   72.24    4.52
  10   0  11   74.66    5.24
  10  10 -12   -0.91    1.86
  10  10 -12   -0.49    1.80
  10   0  12    0.26    2.53
  10  10 -13   18.41    2.94
  10  10 -13   16.77    2.86
  10   0  13   25.71    3.85
  10  10 -14    8.87    2.41
  10  10 -14    5.73    2.33
  10   0  14   11.73    3.29
  10  10 -15   56.71    4.56
  10   0  15   48.76    4.87
  10  10 -16   -0.42    2.08
  10   0  16    0.47    2.66
  10  10 -17   -0.94    2.04
  10   0  17    0.13    2.64
  10  10 -18    3.89    2.52
  10   0  18    7.53    3.13
 -10   0 -19   16.74    3.25
  10  10 -19   40.91    4.57
  10   0  19   36.46    4.69
 -10   0 -20   39.11    4.31
  10  10 -20   90.78    5.99
  10   0  20   95.44    6.22
 -10   0 -21   21.11    3.68
  10  10 -21   43.13    4.87
 -10   0 -22    3.34    2.35
  10  10 -22    7.13    3.04
 -10   0 -23    2.42    2.41
  10  10 -23    3.47    2.88
  12   1 -20   -0.67    2.94
  12   1 -19    6.52    3.30
  12   1 -18   21.36    4.12
  12   1 -17   23.46    4.12
  12  11  16   27.62    4.07
  12   1 -16   22.10    4.14
  12  11  15    0.08    2.67
  12   1 -15    1.86    2.62
  12  11  14   46.71    4.71
  12   1 -14   37.77    4.74
  12  11  13    6.66    2.89
  12   1 -13    2.05    2.50
  12  11  12    8.05    3.02
  12   1 -12    6.90    2.74
  12  11  11   -0.51    2.43
  12   1 -11   -2.65    1.99
  12  11  10   88.74    5.55
  12   1 -10   70.55    5.31
  12  11   9    1.75    2.64
  12   1  -9   -0.32    2.16
  12  11   8   34.66    4.23
  12   1  -8   36.64    4.19
  12   1  -8   27.24    3.73
  12  11   7   -0.82    2.36
  12   1  -7   -0.38    2.38
  12   1  -7    0.63    2.11
  12  11   6   28.80    3.95
  12   1  -6   25.06    3.70
  12   1  -6   16.83    3.26
  12  11   5   17.30    3.39
  12   1  -5   15.34    3.22
  12   1  -5    9.42    2.84
  12  11   4    2.12    2.50
  12   1  -4    3.55    2.60
  12   1  -4    0.31    2.07
  12  11   3   22.11    3.56
  12   1  -3   20.01    3.46
  12  11   2   54.93    4.56
  12   1  -2   56.03    4.75
  12  11   1    1.89    2.36
  12   1  -1   -2.32    2.35
  12  11   0    0.06    2.27
  12   1   0   -0.46    2.45
  12  11  -1   40.90    4.25
  12   1   1   39.95    4.51
  12  11  -2  126.83    6.21
  12   1   2  121.68    6.28
  12  11  -3  116.18    6.02
  12   1   3  102.21    5.94
  12  11  -4    9.73    2.90
  12   1   4    4.94    2.99
  12  11  -5   23.92    3.64
  12   1   5   19.65    3.70
  12  11  -6    7.42    2.74
  12   1   6   13.27    3.34
  12  11  -7   10.00    2.83
  12   1   7   10.66    3.24
  12  11  -8    8.27    2.83
  12   1   8    5.82    3.06
  12  11  -9    7.46    2.67
  12   1   9    6.47    3.20
  12  11 -10    4.96    2.48
  12   1  10    2.08    2.92
  12  11 -11   11.29    2.93
  12   1  11    6.17    3.17
  12  11 -12   18.89    3.28
  12   1  12   17.64    3.84
  12  11 -13   11.28    2.85
  12   1  13   11.31    3.49
  12   1  14    5.08    3.17
  12   1  15    0.14    2.97
  12   1  16    7.13    3.55
  12   1  17   17.98    4.11
  12   1  18    6.50    3.51
  12   1  19    6.23    3.53
  14   2 -16   19.99    4.17
  14  12  15    3.08    3.01
  14   2 -15    1.94    3.05
  14  12  14    9.28    3.44
  14   2 -14    7.40    3.40
  14  12  13   61.82    5.52
  14   2 -13   47.27    5.26
  14  12  12    2.98    3.00
  14   2 -12    0.74    2.65
  14  12  11   17.18    3.85
  14   2 -11   10.88    3.41
  14  12  10    7.00    3.12
  14   2 -10    1.64    2.58
  14  12   9   18.90    3.92
  14   2  -9   19.73    3.88
  14  12   8    4.90    3.05
  14   2  -8    2.73    2.63
  14  12   7    0.11    2.71
  14   2  -7   -0.26    2.61
  14   2  -7    1.23    2.40
  14  12   6    1.22    2.70
  14   2  -6   -1.91    2.60
  14   2  -6    1.49    2.33
  14  12   5   53.42    5.02
  14   2  -5   53.84    5.08
  14   2  -5   33.21    4.42
  14  12   4  133.51    6.90
  14   2  -4  126.95    6.62
  14   2  -4   81.07    5.68
  14  12   3   16.04    3.60
  14   2  -3   10.91    3.38
  14   2  -3    5.77    2.88
  14  12   2   -0.08    2.52
  14   2  -2    3.19    3.01
  14  12   1   11.97    3.33
  14   2  -1   14.91    3.73
  14  12   0   75.81    5.54
  14   2   0   75.68    5.73
  14  12  -1   16.60    3.61
  14   2   1   13.37    3.63
  14  12  -2    0.60    2.56
  14   2   2   -0.20    2.80
  14  12  -3  177.17    7.66
  14   2   3  162.90    7.60
  14  12  -4   17.24    3.61
  14   2   4   22.01    4.14
  14  12  -5   27.54    4.19
  14   2   5   24.71    4.24
  14  12  -6   72.28    5.50
  14   2   6   68.06    5.64
  14  12  -7   28.79    4.15
  14   2   7   26.60    4.41
  14  12  -8    4.91    2.77
  14   2   8   -0.08    2.96
  14  12  -9    7.27    2.95
  14   2   9    5.33    3.28
  14  12 -10   20.03    3.78
  14   2  10   15.18    4.01
  14  12 -11   16.71    3.48
  14   2  11   12.56    3.97
  14  12 -12   23.32    3.88
  14   2  12   23.00    4.61
  16   3  -8   16.99    4.09
  16   3  -7   -0.43    2.82
  16   3  -6   39.80    5.25
  16   3  -6   26.36    4.49
  16   3  -5    2.48    3.21
  16   3  -5    1.74    2.78
  16   3  -4    1.92    3.24
  16   3  -4    0.66    2.58
  16   3  -3   13.12    3.59
  16   3  -2    0.86    2.73
  16   3  -1    4.14    3.07
  -1  -6 -29    1.29    2.38
   1  -5 -29    2.12    2.54
  -1  -6 -28    2.64    2.39
   1  -5 -28    2.96    2.62
   1  -5 -28    0.11    2.91
  -1  -6 -27   45.81    4.59
   1  -5 -27   52.37    4.99
   1  -5 -27   28.96    4.15
  -1  -6 -26   59.24    4.79
  -1  -6 -26   48.33    5.12
   1  -5 -26   73.70    5.36
   1  -5 -26   41.58    5.00
  -1  -6 -25    4.00    2.27
  -1  -6 -25    3.52    2.72
   1  -5 -25    4.34    2.46
   1  -5 -25    5.69    2.75
  -1  -6 -24   19.55    3.28
  -1  -6 -24   12.13    3.08
   1  -5 -24   16.22    3.11
   1  -5 -24   12.59    3.14
  -1  -6 -23    6.48    2.26
  -1  -6 -23    4.12    2.52
   1  -5 -23    5.74    2.33
   1  -5 -23    3.78    2.59
  -1  -6 -22    6.55    2.27
  -1  -6 -22    3.15    2.38
   1  -5 -22    7.24    2.41
   1  -5 -22    5.20    2.51
  -1  -6 -21    2.77    1.89
  -1  -6 -21    2.51    2.22
   1  -5 -21    4.48    2.15
   1  -5 -21    5.78    2.59
  -1  -6 -20   16.32    2.68
  -1  -6 -20    7.70    2.43
   1  -5 -20   18.07    2.96
   1  -5 -20   15.62    3.08
  -1  -6 -19    0.57    1.70
  -1  -6 -19    0.48    1.91
   1  -5 -19    1.39    1.80
   1  -5 -19    1.97    2.13
  -1  -6 -18   43.82    3.53
  -1  -6 -18   20.75    3.02
   1  -5 -18   45.38    3.78
   1  -5 -18   36.67    4.32
  -1  -6 -17   11.62    2.29
  -1  -6 -17    4.98    2.21
   1  -5 -17   16.32    2.68
  -1  -6 -16   38.98    3.24
  -1  -6 -16   17.73    2.72
   1  -5 -16   41.89    3.60
  -1  -6 -15  101.32    4.24
  -1  -6 -15   48.36    4.06
   1  -5 -15  120.40    4.79
  -1  -6 -14    1.30    1.43
  -1  -6 -14    0.21    1.66
   1  -5 -14    3.32    1.65
  -1  -6 -13  332.63    6.38
  -1  -6 -13  141.71    5.17
   1  -5 -13  358.60    6.95
   1   6  12    2.22    0.80
  -1  -6 -12    1.59    1.21
  -1  -6 -12    0.61    1.43
   1  -5 -12    2.32    1.34
   1   6  11   27.31    1.53
  -1  -6 -11   24.01    2.30
  -1  -6 -11    9.32    1.85
   1  -5 -11   28.57    2.56
   1   6  10    1.03    0.80
  -1  -6 -10    0.92    0.99
  -1  -6 -10    0.43    1.24
   1  -5 -10    0.05    1.02
  -1   5   9   11.96    1.10
   1   6   9   10.45    1.16
  -1  -6  -9   12.23    1.46
  -1  -6  -9    5.32    1.43
   1  -5  -9   10.85    1.53
  -1   5   8   15.46    1.28
   1   6   8   14.76    1.51
  -1  -6  -8   15.58    1.66
  -1  -6  -8    5.90    1.37
   1  -5  -8   17.92    1.93
  -1   5   7    5.12    0.87
   1   6   7    4.59    1.00
  -1  -6  -7    5.70    1.00
  -1  -6  -7    0.05    0.25
   1  -5  -7    5.75    1.16
  -1   5   6   78.43    2.15
   1   6   6   99.82    2.58
  -1  -6  -6   97.29    2.38
  -1  -6  -6   51.86    2.80
   1  -5  -6  105.65    2.93
  -1   5   5    4.74    0.95
   1   6   5    5.43    1.06
  -1  -6  -5    5.39    0.82
  -1  -6  -5    3.16    1.16
   1  -5  -5    5.69    1.04
  -1   5   4    0.41    0.78
   1   6   4   -0.01    0.84
  -1  -6  -4    0.34    0.97
   1  -5  -4   -0.02    0.71
  -1   5   3   13.59    1.49
   1   6   3   20.07    1.67
  -1  -6  -3   16.21    1.62
  -1   5   2  443.39    5.19
   1   6   2  601.41    6.21
  -1  -6  -2  415.68    5.47
  -1   5   1  499.13    5.66
   1   6   1  618.71    6.43
  -1  -6  -1  427.09    5.32
   1  -5  -1  573.48    5.72
  -1   5   0  462.90    5.62
   1   6   0  338.61    4.86
  -1  -6   0  469.80    5.33
   1  -5   0  431.23    4.72
  -1   5  -1   -0.20    0.49
   1   6  -1    0.47    0.38
  -1  -6   1   27.84    1.95
   1  -5   1   14.53    1.61
  -1   5  -2   -0.07    0.33
  -1   5  -2   11.97    1.30
   1   6  -2    0.32    0.19
  -1  -6   2   20.72    1.80
   1  -5   2   11.24    1.02
  -1   5  -3   -0.06    0.21
  -1   5  -3   15.85    1.46
   1   6  -3    7.70    1.31
   1   6  -3   25.36    1.39
  -1  -6   3   23.82    1.73
  -1   5  -4    0.68    0.99
  -1   5  -4   -0.10    0.62
   1   6  -4   -0.17    1.01
   1   6  -4    0.64    0.64
  -1  -6   4    0.85    0.78
  -1   5  -5    1.84    1.09
  -1   5  -5    3.24    0.85
   1   6  -5    1.09    1.09
   1   6  -5    5.00    0.93
  -1   5  -6    0.44    0.97
  -1   5  -6   -0.08    0.47
   1   6  -6    0.18    1.01
   1   6  -6    0.39    0.72
  -1   5  -7    4.10    1.26
  -1   5  -7    5.08    1.13
   1   6  -7    2.30    1.16
   1   6  -7    0.14    0.41
  -1   5  -8   33.48    2.40
  -1   5  -8   38.80    2.37
   1   6  -8   21.67    2.14
   1   6  -8   44.15    2.43
  -1   5  -9    3.03    1.24
  -1   5  -9    4.59    1.25
   1   6  -9    2.17    1.22
   1   6  -9    5.18    1.26
  -1   5 -10   57.27    2.96
  -1   5 -10   63.55    3.14
   1   6 -10   26.25    2.29
   1   6 -10   67.99    3.14
  -1   5 -11   65.95    3.13
  -1   5 -11   68.31    3.33
   1   6 -11   33.94    2.54
   1   6 -11   80.73    3.47
  -1   5 -12   53.59    3.02
  -1   5 -12   63.44    3.42
   1   6 -12   29.99    2.50
   1   6 -12   63.65    3.44
  -1   5 -13   75.57    3.52
  -1   5 -13   78.62    3.92
   1   6 -13   46.30    2.91
   1   6 -13   86.82    4.02
  -1   5 -14   16.39    2.14
  -1   5 -14   14.27    2.23
   1   6 -14   10.88    1.83
   1   6 -14   17.75    2.40
  -1   5 -15   20.93    2.59
  -1   5 -15   18.86    2.56
   1   6 -15   15.58    2.08
   1   6 -15   26.27    3.05
  -1   5 -16   31.67    3.03
  -1   5 -16   33.99    3.37
   1   6 -16   21.28    2.55
   1   6 -16   37.69    3.45
  -1   5 -17   46.13    3.37
  -1   5 -17   47.29    3.86
   1   6 -17   38.24    3.03
   1   6 -17   49.80    3.97
  -1   5 -18   10.64    2.15
  -1   5 -18    6.53    2.22
   1   6 -18    7.62    2.24
  -1   5 -19   13.94    2.66
   1   6 -19   14.96    2.69
  -1   5 -20    2.15    1.89
   1   6 -20    3.05    1.98
  -1   5 -21    5.38    2.20
   1   6 -21    5.46    2.21
  -1   5 -22    2.79    2.11
   1   6 -22    4.17    2.29
  -1   5 -23    3.99    2.28
   1   6 -23    4.79    2.32
  -1   5 -24   41.64    4.33
   1   6 -24   49.77    4.62
  -1   5 -25    8.03    2.75
   1   6 -25    9.68    2.79
  -1   5 -26   25.76    4.00
   1   6 -26   26.61    3.96
  -1   5 -27    1.80    2.41
   1   6 -27    4.92    2.71
  -1   5 -28    1.59    2.55
   1   6 -28    3.29    2.49
  -1   5 -29    6.65    3.06
   1   6 -29    7.82    3.09
  -3  -7 -29    3.54    2.56
   3  -4 -29    6.61    3.15
   3  -4 -29    4.46    3.26
  -3  -7 -28    9.45    2.91
   3  -4 -28   11.32    3.37
   3  -4 -28    4.06    3.22
  -3  -7 -27   26.21    3.79
   3  -4 -27   35.96    4.68
   3  -4 -27   27.01    4.35
  -3  -7 -26   17.08    3.18
   3  -4 -26   23.53    3.86
   3  -4 -26   23.38    4.16
  -3  -7 -25    5.61    2.34
  -3  -7 -25    0.46    2.49
   3  -4 -25    3.89    2.55
  -3  -7 -24    6.38    2.30
  -3  -7 -24    7.76    2.90
   3  -4 -24   16.60    3.35
  -3  -7 -23   20.17    3.14
  -3  -7 -23   18.36    3.37
   3  -4 -23   31.33    3.93
  -3  -7 -22    3.10    1.95
  -3  -7 -22    3.00    2.37
   3  -4 -22    2.41    2.30
  -3  -7 -21    4.43    1.96
  -3  -7 -21    3.33    2.33
   3  -4 -21    3.30    2.27
  -3  -7 -20    4.80    1.90
  -3  -7 -20    3.29    2.34
   3  -4 -20    6.41    2.33
  -3  -7 -19   26.59    3.02
  -3  -7 -19   17.51    2.95
   3  -4 -19   35.35    3.81
  -3  -7 -18    1.97    1.65
  -3  -7 -18    2.53    2.04
   3  -4 -18    0.33    1.89
  -3  -7 -17    5.95    1.89
  -3  -7 -17    2.75    2.05
   3  -4 -17    7.96    2.38
  -3  -7 -16   57.51    3.55
  -3  -7 -16   37.47    4.00
   3  -4 -16   85.73    4.71
  -3  -7 -15    4.39    1.64
  -3  -7 -15    0.69    1.90
   3  -4 -15    5.07    1.98
  -3  -7 -14   23.17    2.54
  -3  -7 -14   17.77    2.63
   3  -4 -14   33.31    3.34
   3   7  13    3.16    1.08
  -3  -7 -13    0.78    1.21
  -3  -7 -13    1.65    1.72
   3  -4 -13    2.00    1.64
  -3  -7 -12   35.59    2.53
  -3  -7 -12   20.76    2.54
   3  -4 -12   52.54    3.48
  -3  -7 -11   18.11    1.97
  -3  -7 -11   14.46    2.21
   3  -4 -11   33.13    2.85
   3   7  10    3.13    0.84
  -3  -7 -10    8.97    1.33
  -3  -7 -10    6.80    1.75
   3  -4 -10   16.10    2.09
   3   7   9    0.42    0.61
  -3  -7  -9    4.44    1.03
  -3  -7  -9    4.63    1.55
   3  -4  -9   14.15    1.63
   3  -4  -9    9.09    1.69
   3   7   8    0.87    0.58
  -3  -7  -8   37.77    1.89
  -3  -7  -8   24.17    2.73
   3  -4  -8   75.96    2.37
   3  -4  -8   62.47    3.15
   3   7   7    1.32    0.57
  -3  -7  -7   11.25    1.28
  -3  -7  -7    9.17    1.65
   3  -4  -7   25.24    1.93
   3  -4  -7   18.45    2.12
   3   7   6    0.20    0.54
  -3  -7  -6    0.87    0.58
  -3  -7  -6   -0.28    0.62
   3  -4  -6    0.88    1.01
   3  -4  -6    0.69    0.96
   3   7   5    0.08    0.54
  -3  -7  -5   -0.24    0.32
   3  -4  -5   20.02    1.96
  -3   4   4    0.64    0.88
   3   7   4   -0.36    0.58
  -3  -7  -4    0.45    1.08
  -3   4   3   38.27    2.06
  -3  -7  -3   26.32    2.41
  -3   4   2   53.55    2.30
   3   7   2   44.85    2.34
  -3  -7  -2   41.75    2.63
  -3   4   1   -0.04    0.64
   3   7   1   70.88    2.84
  -3  -7  -1   53.83    2.78
  -3  -7   0  599.96    7.05
  -3   4  -1   16.28    1.72
   3   7  -1    0.64    0.43
  -3  -7   1   14.32    1.62
  -3   4  -2   47.89    2.36
   3   7  -2   27.65    1.95
  -3  -7   2   44.44    2.54
  -3   4  -3   -0.19    0.42
   3   7  -3   59.07    2.80
   3   7  -3   68.20    1.90
  -3   4  -4   52.95    2.48
   3   7  -4   95.34    3.36
   3   7  -4  113.37    2.57
  -3   4  -5  173.75    4.42
  -3   4  -5   95.37    3.22
   3   7  -5  144.39    3.97
   3   7  -5  181.63    3.44
  -3   4  -6    1.86    1.24
  -3   4  -6    1.03    0.92
   3   7  -6    1.00    1.15
   3   7  -6    1.59    0.86
  -3   4  -7   23.62    2.30
  -3   4  -7   15.57    1.93
   3   7  -7   14.45    1.84
   3   7  -7    0.02    0.41
  -3   4  -8    7.20    1.60
  -3   4  -8    5.44    1.29
   3   7  -8    2.31    1.29
   3   7  -8    5.90    1.26
  -3   4  -9   19.73    2.38
  -3   4  -9   13.25    1.83
   3   7  -9    8.32    1.60
   3   7  -9   18.16    2.11
  -3   4 -10    6.82    1.67
  -3   4 -10    4.64    1.41
   3   7 -10    2.14    1.24
   3   7 -10    6.74    1.50
  -3   4 -11  199.09    5.31
  -3   4 -11  156.96    4.93
   3   7 -11   62.18    3.13
   3   7 -11  200.38    5.17
  -3   4 -12    3.72    1.74
  -3   4 -12    3.72    1.52
   3   7 -12    3.08    1.42
   3   7 -12    4.23    1.57
  -3   4 -13  235.60    5.94
  -3   4 -13  194.72    5.86
   3   7 -13   96.83    3.84
   3   7 -13  232.82    6.04
  -3   4 -14    0.79    1.65
  -3   4 -14    1.59    1.51
   3   7 -14    0.01    1.33
   3   7 -14    2.71    1.65
  -3   4 -15   -1.23    1.57
  -3   4 -15   -0.63    1.46
   3   7 -15   -0.32    1.30
   3   7 -15    0.88    1.59
  -3   4 -16  113.25    5.18
   3   7 -16   58.38    3.47
   3   7 -16  139.74    5.51
   3  -4  16  147.22    5.48
  -3   4 -17    3.44    1.91
   3   7 -17    6.49    2.17
   3  -4  17    8.83    2.63
  -3   4 -18    3.99    1.97
   3   7 -18    4.62    2.06
   3  -4  18    4.85    2.33
  -3   4 -19    1.65    1.80
   3   7 -19    1.26    1.77
  -3   4 -20    3.33    2.06
   3   7 -20    4.97    2.12
  -3   4 -21    0.32    1.70
   3   7 -21    0.94    1.87
  -3   4 -22    6.35    2.41
   3   7 -22    7.26    2.50
  -3   4 -23    4.63    2.25
   3   7 -23    4.23    2.35
  -3   4 -24   60.91    4.96
   3   7 -24   70.31    5.15
  -3   4 -25   35.84    4.24
   3   7 -25   38.90    4.41
  -3   4 -26   12.09    3.20
   3   7 -26    8.50    2.86
  -3   4 -27    2.57    2.45
   3   7 -27    2.62    2.49
  -3   4 -28    1.62    2.49
   3   7 -28   -0.38    2.39
   5  -3 -28   18.38    3.98
   5  -3 -27   18.78    4.01
   5  -3 -26   41.89    4.94
   5  -3 -25   21.66    3.98
   5  -3 -24   20.29    3.66
  -5  -8 -23    0.54    1.84
  -5  -8 -23   -0.21    2.21
   5  -3 -23    3.80    2.55
  -5  -8 -22    5.19    2.07
  -5  -8 -22    4.12    2.44
   5  -3 -22    6.33    2.66
  -5  -8 -21    3.99    1.98
  -5  -8 -21    3.21    2.37
   5  -3 -21    9.99    2.84
  -5  -8 -20    3.93    1.80
  -5  -8 -20    1.58    2.23
   5  -3 -20    4.62    2.44
  -5  -8 -19    5.44    1.88
  -5  -8 -19    2.19    2.16
   5  -3 -19    4.42    2.27
  -5  -8 -18   20.05    2.64
  -5  -8 -18   20.58    3.19
   5  -3 -18   38.79    3.95
  -5  -8 -17    2.03    1.53
  -5  -8 -17    2.66    2.09
   5  -3 -17    5.63    2.32
  -5  -8 -16    5.59    1.79
  -5  -8 -16    3.76    2.26
   5  -3 -16   12.01    2.64
  -5  -8 -15   36.06    2.97
  -5  -8 -15   39.90    4.06
   5  -3 -15   72.13    4.62
   5   8  14   53.23    3.41
  -5  -8 -14   18.60    2.29
  -5  -8 -14   26.43    3.24
   5  -3 -14   36.14    3.74
   5   8  13  222.59    5.44
  -5  -8 -13   69.90    3.32
  -5  -8 -13   90.09    4.78
   5  -3 -13  163.51    5.78
   5   8  12  168.38    4.88
  -5  -8 -12   55.20    2.90
  -5  -8 -12   73.50    4.31
   5  -3 -12  123.62    5.17
   5   8  11    1.31    1.69
  -5  -8 -11    0.89    1.01
  -5  -8 -11    1.46    1.75
   5  -3 -11   -1.33    1.54
   5   8  10   42.54    3.08
  -5  -8 -10   14.00    1.61
  -5  -8 -10   24.05    2.79
   5  -3 -10   46.66    2.60
   5  -3 -10   34.38    3.24
   5   8   9    1.81    1.58
  -5  -8  -9    0.69    0.84
  -5  -8  -9    1.62    1.65
   5  -3  -9    1.80    1.30
   5  -3  -9    2.78    1.56
   5   8   8    1.30    1.48
  -5  -8  -8    0.94    0.76
  -5  -8  -8   -0.17    1.44
   5  -3  -8    1.07    1.26
   5  -3  -8    1.07    1.32
   5   8   7   13.28    1.99
  -5  -8  -7    5.63    0.96
  -5  -8  -7    6.81    1.79
   5  -3  -7   14.18    1.76
   5  -3  -7    7.39    1.71
   5   8   6   58.63    3.22
  -5  -8  -6   40.35    3.09
   5  -3  -6   67.41    3.09
   5  -3  -6   41.06    2.94
   5   8   5  155.33    4.51
  -5  -8  -5  104.73    4.14
   5  -3  -5  160.27    4.21
   5  -3  -5   96.00    3.88
   5   8   4    5.00    1.61
  -5  -8  -4   -0.27    0.37
   5  -3  -4    6.63    1.61
   5   8   3  232.86    5.34
   5  -3  -3  236.82    5.07
   5   8   2  748.79    9.10
  -5  -8  -2  575.94    8.22
   5  -3  -2  742.73    8.56
   5   8   1  136.44    4.31
  -5  -8  -1  111.45    4.12
   5  -3  -1  141.14    4.27
   5   8   0   56.76    3.04
   5   8   0   51.66    1.74
  -5  -8   0   52.00    3.13
   5  -3   0   56.80    3.22
   5   8  -1    0.53    0.37
   5   8  -1   73.20    2.08
   5  -3   1   86.49    3.71
   5   8  -2    1.10    1.33
   5   8  -2    1.70    0.76
   5  -3   2   -0.13    1.48
   5   8  -3   37.73    2.77
   5   8  -3   38.97    1.93
   5  -3   3   41.24    3.12
   5   8  -4   26.61    2.60
   5   8  -4   26.79    1.87
   5  -3   4   23.35    2.43
   5   8  -5    5.06    1.57
   5   8  -5    5.51    1.12
   5  -3   5    4.40    1.29
   5   8  -6   47.33    3.03
   5   8  -6    0.03    0.51
   5  -3   6   49.30    3.40
  -5   3  -7   17.35    2.10
   5   8  -7   20.37    2.47
   5   8  -7   24.34    2.24
   5  -3   7   27.98    3.10
  -5   3  -8   43.93    2.93
   5   8  -8   70.04    3.48
   5   8  -8   85.50    3.37
   5  -3   8   84.23    4.12
  -5   3  -9   20.31    2.30
   5   8  -9   27.11    2.69
   5   8  -9   34.02    2.73
   5  -3   9   30.52    3.34
  -5   3 -10    0.20    0.46
   5   8 -10   36.31    2.94
   5   8 -10   46.38    3.09
   5  -3  10   52.26    3.86
  -5   3 -11    0.01    0.42
   5   8 -11   14.36    2.17
   5   8 -11   17.85    2.29
   5  -3  11   21.09    2.89
  -5   3 -12    0.37    0.53
   5   8 -12    3.11    1.58
   5   8 -12    5.09    1.72
   5  -3  12    5.41    2.30
  -5   3 -13    6.59    1.66
   5   8 -13    6.93    1.87
   5   8 -13   15.99    2.43
   5  -3  13   15.54    2.80
  -5   3 -14   78.87    4.37
   5   8 -14   53.13    3.41
   5   8 -14  132.16    5.21
   5  -3  14  135.03    5.53
  -5   3 -15    1.74    1.63
   5   8 -15    0.60    1.53
   5   8 -15    2.00    1.86
   5  -3  15    3.40    2.38
  -5   3 -16   -0.40    1.45
   5   8 -16    0.77    1.48
   5   8 -16    0.58    1.70
   5  -3  16   -0.19    2.19
  -5   3 -17   78.37    4.62
   5   8 -17  106.10    5.22
   5  -3  17  119.06    5.41
  -5   3 -18    0.64    1.64
   5   8 -18    4.58    2.08
   5  -3  18    2.78    2.37
  -5   3 -19   11.71    2.54
   5   8 -19   23.30    3.33
   5  -3  19   22.92    3.33
  -5   3 -20    3.69    2.07
   5   8 -20    4.57    2.21
  -5   3 -21    3.11    2.15
   5   8 -21    4.31    2.31
  -5   3 -22   22.60    3.48
   5   8 -22   34.55    4.17
  -5   3 -23   37.73    4.13
   5   8 -23   49.73    4.66
  -5   3 -24    1.37    2.11
   5   8 -24    7.86    2.71
  -5   3 -25    2.86    2.37
   5   8 -25    4.19    2.56
  -5   3 -26   17.31    3.52
   5   8 -26   26.50    4.08
  -5   3 -27   19.50    3.77
   5   8 -27   20.75    3.88
  -5   3 -28    2.61    2.56
   7  -2 -26   -0.34    2.82
   7  -2 -25   23.53    4.27
   7  -2 -24   -0.06    2.48
   7  -2 -23   10.04    3.18
  -7  -9 -22    9.58    3.14
   7  -2 -22   13.44    3.24
  -7  -9 -21   -1.09    2.38
   7  -2 -21    1.04    2.35
  -7  -9 -20    0.76    2.40
   7  -2 -20   -0.19    2.17
  -7  -9 -19   23.38    3.53
   7  -2 -19   28.38    3.83
  -7  -9 -18    3.98    2.56
   7  -2 -18    9.46    2.78
  -7  -9 -17  108.75    5.61
   7  -2 -17  134.62    6.26
  -7  -9 -16   19.71    3.11
   7  -2 -16   20.91    3.22
  -7  -9 -15    6.58    2.38
   7  -2 -15    5.05    2.28
   7   9  14   16.42    2.77
  -7  -9 -14   11.67    2.69
   7  -2 -14   14.40    2.84
   7   9  13  134.73    5.27
  -7  -9 -13   80.98    4.97
   7  -2 -13   93.62    5.26
   7   9  12   38.07    3.79
  -7  -9 -12   23.00    3.20
   7  -2 -12   27.18    3.31
   7   9  11    5.72    2.28
  -7  -9 -11    3.46    2.19
   7  -2 -11    2.65    2.01
   7   9  10  167.91    5.55
  -7  -9 -10  125.74    5.45
   7  -2 -10  183.04    4.87
   7  -2 -10  130.23    5.47
   7   9   9   69.57    4.12
  -7  -9  -9   52.60    4.22
   7  -2  -9   68.23    3.63
   7  -2  -9   43.65    3.80
   7   9   8  200.94    5.92
  -7  -9  -8  160.46    5.82
   7  -2  -8  210.38    5.34
   7  -2  -8   -0.32    1.07
   7   9   7   43.38    3.55
  -7  -9  -7   32.37    3.74
   7  -2  -7   40.79    3.32
   7  -2  -7    0.03    0.66
   7   9   6    7.42    2.21
  -7  -9  -6    5.20    2.04
   7  -2  -6    7.14    2.03
   7  -2  -6    0.15    0.68
   7   9   5    1.30    1.79
  -7  -9  -5    3.19    1.86
   7  -2  -5    1.48    1.76
   7  -2  -5   -0.10    0.60
   7   9   4    0.52    1.74
  -7  -9  -4    0.23    1.63
   7  -2  -4    0.69    1.71
   7   9   3    8.92    2.21
  -7  -9  -3    8.61    1.68
   7  -2  -3   11.28    2.25
   7   9   2    8.75    2.12
   7  -2  -2    9.37    2.17
   7   9   1    4.02    1.89
   7   9   1    2.17    1.14
   7  -2  -1    4.54    2.02
   7   9   0    0.75    0.46
   7   9   0  363.39    5.04
   7  -2   0  419.67    7.78
   7   9  -1  107.85    4.32
   7   9  -1  122.15    3.28
   7  -2   1  135.40    5.03
   7   9  -2   49.57    3.53
   7   9  -2   40.10    2.12
   7  -2   2   48.65    3.74
   7   9  -3  351.88    7.42
   7   9  -3   -0.14    0.52
   7  -2   3  345.35    7.46
   7   9  -4  166.82    5.45
   7   9  -4  168.22    4.12
   7   9  -5   74.48    4.12
   7   9  -5   66.60    3.04
   7  -2   5   -0.04    0.56
   7   9  -6   18.42    2.68
   7   9  -6   17.86    2.04
   7  -2   6   -0.08    0.67
   7   9  -7    5.50    2.01
   7   9  -7    6.26    1.63
   7  -2   7    6.70    2.25
   7   9  -8  112.07    4.71
   7   9  -8  110.20    4.15
   7  -2   8  121.84    5.36
   7   9  -9    0.49    1.70
   7   9  -9    0.94    1.48
   7  -2   9    1.82    2.23
  -7   2 -10   46.99    3.46
   7   9 -10   98.55    4.55
   7   9 -10  105.13    4.36
   7  -2  10  103.79    5.18
  -7   2 -11   15.17    2.45
   7   9 -11   31.00    3.24
   7   9 -11   44.14    3.55
   7  -2  11   44.23    4.26
  -7   2 -12    5.28    1.96
   7   9 -12    6.18    2.05
   7   9 -12    9.75    2.21
   7  -2  12   10.57    2.88
  -7   2 -13   31.66    3.29
   7   9 -13   47.89    3.58
   7   9 -13   67.09    4.15
   7  -2  13   73.96    4.85
  -7   2 -14   47.63    3.81
   7   9 -14   67.54    3.95
   7   9 -14   91.85    4.72
   7  -2  14   91.84    5.17
  -7   2 -15   15.76    2.60
   7   9 -15   19.70    2.63
   7   9 -15   33.66    3.58
   7  -2  15   30.98    3.77
  -7   2 -16    8.45    2.27
   7   9 -16   19.23    2.91
   7  -2  16   26.22    3.61
  -7   2 -17    0.48    1.73
   7   9 -17    0.81    1.86
   7  -2  17   -0.57    2.40
  -7   2 -18    1.11    1.77
   7   9 -18    0.92    1.95
   7  -2  18    0.31    2.51
  -7   2 -19    3.14    2.14
   7   9 -19    6.33    2.48
   7  -2  19    5.13    2.83
  -7   2 -20    5.18    2.35
   7   9 -20   13.85    3.01
  -7   2 -21    1.60    2.01
   7   9 -21    1.67    2.14
  -7   2 -22    2.05    2.08
   7   9 -22    1.89    2.23
  -7   2 -23   11.03    2.94
   7   9 -23   15.06    3.36
  -7   2 -24   12.79    3.24
   7   9 -24   22.07    3.79
  -7   2 -25    6.73    2.73
   7   9 -25   12.56    3.41
  -7   2 -26    2.72    2.51
   7   9 -26    3.03    2.83
   9  -1 -24    5.70    3.20
   9  -1 -23    1.77    2.64
   9  -1 -22   13.33    3.65
   9  -1 -21    0.38    2.42
  -9 -10 -20   -0.74    2.54
   9  -1 -20   -1.97    2.15
  -9 -10 -19   24.71    3.81
   9  -1 -19   33.32    4.40
  -9 -10 -18    3.67    2.77
   9  -1 -18    6.64    2.66
  -9 -10 -17    0.46    2.52
   9  -1 -17    2.11    2.24
  -9 -10 -16   52.33    4.77
   9  -1 -16   64.04    4.93
   9  10  15   83.64    4.96
  -9 -10 -15   51.27    4.72
   9  -1 -15   57.22    4.72
   9  10  14    2.52    2.26
  -9 -10 -14    0.92    2.33
   9  -1 -14    0.22    1.99
   9  10  13   19.58    3.15
  -9 -10 -13   16.53    3.10
   9  -1 -13   18.58    3.19
   9  10  12  232.51    7.15
  -9 -10 -12  176.88    6.73
   9  -1 -12  166.07    6.63
   9  10  11   26.43    3.33
  -9 -10 -11   20.04    3.22
   9  -1 -11   21.54    3.28
   9  10  10   77.64    4.81
  -9 -10 -10   62.14    4.76
   9  -1 -10   53.64    4.28
   9  10   9   -0.42    2.14
  -9 -10  -9   -0.06    2.14
   9  -1  -9   -0.20    2.06
   9  -1  -9   -0.80    1.77
   9  10   8   24.41    3.32
  -9 -10  -8   17.02    3.09
   9  -1  -8   25.81    3.10
   9  -1  -8   12.93    2.60
   9  10   7   -0.15    2.20
  -9 -10  -7    1.27    2.26
   9  -1  -7    0.88    2.16
   9  -1  -7    0.52    1.82
   9  10   6   -0.44    2.24
   9  -1  -6    0.67    2.17
   9  -1  -6   -0.95    1.74
   9  10   5  113.88    5.39
   9  -1  -5  114.76    5.10
   9  -1  -5   67.56    4.66
   9  10   4    7.40    2.61
   9  -1  -4    9.37    2.59
   9  10   3  337.03    8.20
   9  -1  -3  322.93    7.71
   9  10   2   86.68    4.89
   9  -1  -2   85.49    4.84
   9  10   1    0.39    1.99
   9  -1  -1    1.65    2.42
   9  10   0   11.12    2.44
   9  -1   0   15.11    3.00
   9  10  -1   32.61    3.75
   9  -1   1   34.08    3.92
   9  10  -2    5.56    2.43
   9  -1   2    4.50    2.56
   9  10  -3    5.58    2.42
   9  -1   3    6.83    2.70
   9  10  -4   26.99    3.35
   9  -1   4   23.18    3.40
   9  10  -5    4.17    2.31
   9  10  -5    3.93    1.65
   9  -1   5    4.79    2.51
   9  10  -6   88.73    4.88
   9  10  -6   78.19    3.89
   9  -1   6   80.33    5.04
   9  10  -7   53.01    4.17
   9  10  -7   49.00    3.50
   9  -1   7   56.16    4.67
   9  10  -8  241.44    7.10
   9  10  -8  241.90    6.23
   9  -1   8  249.61    7.73
   9  10  -9  114.60    5.19
   9  10  -9  122.02    4.89
   9  -1   9  112.65    5.68
   9  10 -10   43.79    3.77
   9  10 -10   55.92    3.90
   9  -1  10   54.39    4.55
   9  10 -11   23.48    3.07
   9  10 -11   23.70    2.94
   9  -1  11   24.79    3.66
   9  10 -12   -0.15    1.77
   9  10 -12   -0.80    1.70
   9  -1  12    0.05    2.42
   9  10 -13   33.69    3.48
   9  10 -13   36.94    3.80
   9  -1  13   34.33    4.17
   9  10 -14    1.92    1.86
   9  10 -14    2.89    1.99
   9  -1  14    0.82    2.56
  -9   1 -15   62.33    4.47
   9  10 -15  156.55    6.22
   9  -1  15  155.55    6.74
  -9   1 -16    8.56    2.48
   9  10 -16   21.92    3.26
   9  -1  16   24.32    3.88
  -9   1 -17   50.50    4.34
   9  10 -17  121.77    6.00
   9  -1  17  111.23    6.11
  -9   1 -18    0.52    1.83
   9  10 -18    2.57    2.26
   9  -1  18    0.06    2.72
  -9   1 -19   -0.13    1.72
   9  10 -19    0.13    2.14
   9  -1  19    0.07    2.80
  -9   1 -20    4.60    2.28
   9  10 -20   14.68    3.20
   9  -1  20   12.36    3.45
  -9   1 -21    1.71    2.17
   9  10 -21    2.74    2.46
  -9   1 -22   28.44    4.17
   9  10 -22   62.14    5.40
  -9   1 -23    2.89    2.37
   9  10 -23    1.52    2.51
  -9   1 -24    2.16    2.39
   9  10 -24    0.56    2.46
  11   0 -22   20.90    4.25
  11   0 -21   -1.27    2.68
  11   0 -20   -0.63    2.64
  11   0 -19   38.01    5.00
 -11 -11 -18    1.62    2.73
  11   0 -18    0.97    2.47
 -11 -11 -17  232.79    8.48
  11   0 -17  217.37    8.63
 -11 -11 -16   19.27    3.61
  11   0 -16   15.36    3.46
  11  11  15   19.68    3.52
 -11 -11 -15   14.73    3.33
  11   0 -15   13.60    3.26
  11  11  14   14.52    3.24
 -11 -11 -14   10.03    3.07
  11   0 -14    8.69    2.95
  11  11  13   79.95    5.23
 -11 -11 -13   66.06    5.21
  11   0 -13   61.90    5.09
  11  11  12   14.03    3.24
  11   0 -12    9.85    2.88
  11  11  11   43.23    4.43
  11   0 -11   28.64    3.83
  11  11  10  274.96    8.43
  11   0 -10  200.84    7.59
  11  11   9  119.97    5.96
  11   0  -9   78.50    5.22
  11  11   8  104.56    5.65
  11   0  -8  106.02    5.35
  11   0  -8   78.25    5.13
  11  11   7    1.58    2.47
  11   0  -7    1.40    2.36
  11   0  -7   -0.16    1.87
  11  11   6    6.56    2.69
  11   0  -6    2.61    2.44
  11   0  -6    4.99    2.34
  11  11   5  108.22    5.65
  11   0  -5  102.70    5.30
  11   0  -5   56.36    4.66
  11  11   4   17.92    3.24
  11   0  -4   17.17    3.15
  11  11   3   35.27    3.95
  11   0  -3   38.33    4.18
  11  11   2    5.56    2.51
  11   0  -2    4.02    2.68
  11  11   1   48.02    4.22
  11   0  -1   51.52    4.52
  11  11   0    1.59    2.21
  11   0   0    0.46    2.40
  11  11  -1   40.88    4.08
  11   0   1   44.02    4.41
  11  11  -2   22.32    3.39
  11   0   2   21.05    3.53
  11  11  -3  147.83    6.28
  11   0   3  135.95    6.28
  11  11  -4   13.26    2.96
  11   0   4   13.56    3.23
  11  11  -5    2.49    2.33
  11   0   5    3.14    2.58
  11  11  -6   32.74    3.88
  11   0   6   32.41    4.11
  11  11  -7    0.57    2.19
  11   0   7   -2.22    2.34
  11  11  -8   43.10    4.09
  11   0   8   44.73    4.53
  11  11  -9   44.79    4.13
  11   0   9   41.06    4.58
  11  11 -10   45.12    4.11
  11   0  10   48.97    4.80
  11  11 -11    5.96    2.40
  11   0  11    1.34    2.87
  11  11 -12    3.07    2.25
  11   0  12    2.19    2.85
  11  11 -13    2.32    2.14
  11   0  13   -0.98    2.61
  11   0  14   12.89    3.59
  11   0  15    4.08    3.07
  11   0  16    1.74    2.90
  11   0  17   36.15    4.70
  11   0  18    2.23    3.15
  11   0  19    0.44    3.01
  11   0  20   -0.52    3.13
  13   1 -18   -1.00    2.70
  13   1 -17   -0.18    2.81
  13   1 -16   14.44    3.76
  13  12  15    2.78    2.87
  13   1 -15   -2.04    2.43
  13  12  14    0.39    2.78
  13   1 -14   -0.89    2.59
  13  12  13    7.01    3.12
  13   1 -13    4.08    2.80
  13  12  12   10.62    3.34
  13   1 -12    8.95    3.15
  13  12  11   33.47    4.50
  13   1 -11   23.75    4.03
  13  12  10    0.26    2.61
  13   1 -10    0.88    2.38
  13  12   9   -0.45    2.63
  13   1  -9    2.46    2.44
  13  12   8    9.54    3.17
  13   1  -8    9.35    2.97
  13  12   7    2.09    2.65
  13   1  -7   -0.94    2.49
  13   1  -7    0.68    2.23
  13  12   6   38.20    4.39
  13   1  -6   33.74    4.21
  13   1  -6   21.52    3.62
  13  12   5    4.47    2.82
  13   1  -5    2.62    2.85
  13   1  -5    2.87    2.54
  13  12   4    1.44    2.60
  13   1  -4    4.05    2.85
  13   1  -4   -0.22    2.19
  13  12   3   33.22    4.27
  13   1  -3   31.08    4.14
  13  12   2   20.31    3.64
  13   1  -2   18.94    3.70
  13  12   1   33.85    4.15
  13   1  -1   36.05    4.53
  13  12   0   -0.99    2.41
  13   1   0   -1.74    2.63
  13  12  -1    1.87    2.57
  13   1   1   -0.33    2.72
  13  12  -2   45.74    4.58
  13   1   2   48.61    4.91
  13  12  -3   97.08    5.82
  13   1   3   89.17    5.92
  13  12  -4   35.95    4.34
  13   1   4   23.59    4.10
  13  12  -5    7.76    2.88
  13   1   5    8.84    3.30
  13  12  -6    1.52    2.46
  13   1   6   -0.07    2.70
  13  12  -7    4.09    2.69
  13   1   7    6.31    3.20
  13  12  -8   51.21    4.75
  13   1   8   47.07    4.99
  13  12  -9   59.95    4.94
  13   1   9   55.57    5.31
  13  12 -10  101.14    5.91
  13   1  10  113.48    6.70
  13  12 -11    0.96    2.34
  13   1  11    0.23    2.90
  13  12 -12    2.28    2.38
  13   1  12    3.39    3.18
  13   1  13   -2.99    3.01
  13   1  14   57.96    5.76
  13   1  15  189.58    8.61
  15   2 -12   51.56    5.65
  15   2 -11   35.10    4.97
  15   2 -10   80.03    6.30
  15   2  -9    7.77    3.27
  15   2  -8    0.29    2.66
  15  13   7    4.78    3.19
  15   2  -7    3.90    2.88
  15  13   6    1.44    2.94
  15   2  -6    2.70    3.09
  15   2  -6   -0.39    2.57
  15  13   5   31.78    4.64
  15   2  -5   34.72    4.75
  15   2  -5   21.83    4.11
  15  13   4   30.95    4.53
  15   2  -4   26.41    4.42
  15   2  -4   14.73    3.49
  15  13   3   40.83    4.84
  15   2  -3   37.64    4.87
  15   2  -3   19.08    3.87
  15  13   2   69.32    5.61
  15   2  -2   67.18    5.73
  15   2  -2   44.92    4.96
  15  13   1    1.53    2.73
  15   2  -1    2.15    3.19
  15  13   0    4.78    2.99
  15   2   0    6.26    3.42
  15  13  -1   21.90    4.02
  15   2   1   17.67    4.02
  15  13  -2   39.35    4.78
  15   2   2   46.44    5.32
  15  13  -3   17.28    3.87
  15   2   3   17.55    4.07
  15  13  -4    4.05    2.97
  15   2   4    1.19    3.12
  15  13  -5    7.62    3.19
  15   2   5    1.50    3.21
  15  13  -6   12.22    3.51
  15   2   6    5.97    3.54
  15  13  -7    4.55    3.07
  15  13  -8    8.68    3.29
  15  13  -9    2.95    2.87
  15  13 -10    3.78    2.92
  15  13 -11   -0.73    2.62
   0  -6 -29    0.47    2.31
   0  -6 -28   19.59    3.63
   0  -6 -28   14.78    3.82
   0  -6 -27    1.58    2.39
   0  -6 -27    1.88    2.70
   0  -6 -26   -0.60    2.01
   0  -6 -26    0.99    2.53
   0  -6 -25   -0.46    1.93
   0  -6 -25    0.63    2.50
   0  -6 -24   18.60    3.20
   0  -6 -24   11.26    3.10
   0  -6 -23    0.79    1.90
   0  -6 -23    1.23    2.40
[truncated: 503,675 more chars]
